# Supplementary material for: Investigating RNA expression profiles altered by nicotinamide mononucleotide therapy in a chronic model of alcoholic liver disease
Source: Hum Genomics. 2019 Dec 10;13:65. doi: 10.1186/s40246-019-0251-1 (PMC6902345; doi:10.1186/s40246-019-0251-1)
Supplement: Supplementary file 2 — Additional file 2: Table S1: Metabolomics. [file 40246_2019_251_MOESM2_ESM.xlsx]

## Sheet: all results
Metabolite	Any Effect of Ethanol (p-value)	Any Effect of Ethanol (FDR)	Difference in Ethanol Effect Due to NMN (p-value)	Ethanol Effect in Saline Group (ratio of ethanol to control)	Ethanol Effect in Saline Group (p-value)	Ethanol Effect in NMN Group (ratio of ethanol to control)	Ethanol Effect in NMN Group (p-value)	NMN Effect in Control Group (ratio of NMN to Saline)	NMN Effect in Control Group (p-value)	NMN Effect in Control Group (FDR)
5-Amino-1-(5-Phospho-D-ribosyl)imidazole-4-carboxamide	0.0399512	0.118269	0.118459	4.20567	0.0131553	1.22496	0.713338	1.21325	0.710487	0.905138
adenosine	0.600406	0.679723	0.331343	0.760173	0.409753	1.22018	0.570381	0.536842	0.0735727	0.764434
CDP	0.0162266	0.0714724	0.619003	0.179377	0.0154522	0.28575	0.0800533	0.868928	0.826286	0.939178
CMP	0.0182149	0.0752013	0.903962	0.636691	0.0375272	0.61455	0.0348586	1.19531	0.381499	0.905138
CTP	0.0458437	0.127393	0.603798	0.0705037	0.0338213	0.169558	0.16134	0.990448	0.993368	0.996841
cytidine	0.00169059	0.0174493	0.555862	0.376354	0.00237815	0.47617	0.0196388	0.918712	0.755969	0.920477
Deoxyinosine	0.252711	0.397984	0.105695	0.786873	0.328741	1.42786	0.177684	0.849299	0.501979	0.905138
Deoxyuridine	0.62894	0.696412	0.659841	1.26427	0.361968	1.07386	0.791293	1.16765	0.543596	0.905138
dUDP	0.145219	0.289437	0.425134	0.517043	0.0679109	0.771879	0.477758	0.891231	0.736026	0.91686
GDP	0.0145747	0.0679371	0.158505	0.427451	0.00572582	0.756629	0.334992	0.771503	0.341299	0.905138
GMP	0.436647	0.565879	0.209817	0.90033	0.458014	1.17148	0.296087	0.839364	0.223268	0.905138
GTP	0.0261054	0.089815	0.276621	0.305573	0.0122372	0.606388	0.275159	0.691101	0.388934	0.905138
guanosine	0.329288	0.473454	0.281016	0.558928	0.143088	1.03246	0.937293	0.700145	0.358667	0.905138
Hypoxanthine	0.605636	0.679723	0.772732	1.14751	0.619022	1.28887	0.39124	0.880827	0.646338	0.905138
IMP	0.0371334	0.116647	0.999225	0.52509	0.0537529	0.525323	0.0673408	0.943816	0.85349	0.945052
inosine	0.191343	0.331127	0.202691	0.604825	0.0736019	1.00482	0.98638	0.838561	0.510841	0.905138
Thymidine	0.385335	0.540591	0.457857	1.36588	0.181898	1.06649	0.788962	1.19192	0.44284	0.905138
UDP	0.141981	0.286941	0.163831	0.55561	0.0519091	1.0063	0.983316	0.805005	0.44789	0.905138
UMP	0.341999	0.489296	0.15233	0.819463	0.261594	1.19253	0.346145	0.839863	0.32275	0.905138
uridine	0.419951	0.559064	0.209995	0.881086	0.530544	1.28387	0.250741	0.871743	0.497018	0.905138
UTP	0.0188441	0.0767034	0.236958	0.199656	0.00857272	0.52002	0.265571	0.730285	0.56421	0.905138
(-)-Salsolinol/NN-dimethyldopaminequinone-1	0.0399915	0.118269	0.0700988	0.585044	0.0125259	1.00137	0.994646	0.789027	0.229244	0.905138
(R)-2-hydroxy-4-methylpentanoate	0.0594506	0.155436	0.30087	1.21104	0.331762	1.63179	0.0287748	0.668406	0.052041	0.666509
(R)-carnitine	0.244155	0.390712	0.0987215	1.18365	0.229949	0.837675	0.234205	1.21755	0.164634	0.905138
(R)-mevalonate	0.175072	0.308511	0.24818	0.598808	0.0675912	0.944711	0.839566	1.00218	0.993435	0.996841
1-methylnicotinamide	0.264988	0.411728	0.388594	0.911186	0.659394	0.697156	0.120908	3.16784	5.31267e-05	0.0153536
1-methylpyrrolinium	0.220227	0.374386	0.353586	1.15169	0.638806	1.73783	0.0974997	0.700633	0.246202	0.905138
12,13-epoxy-9-hydroperoxy-10E-octadecenoate	0.0180545	0.0752013	0.654603	1.76741	0.0599839	2.12929	0.0224005	0.938665	0.82417	0.939178
12S-HHT	0.479318	0.594519	0.70634	1.17779	0.278806	1.08558	0.602774	0.839762	0.249055	0.905138
15(S)-Hydroxyeicosatrienoic acid	9.86206e-06	0.000422116	0.0450282	3.86619	7.82781e-06	2.02072	0.00529234	1.08839	0.683205	0.905138
2-aminoacrylic acid	0.0048818	0.0371274	0.354643	0.540404	0.00369025	0.693566	0.0734095	0.923125	0.661728	0.905138
2-aminomuconate	0.00102775	0.0129139	0.650593	0.177679	0.0019108	0.242248	0.0108798	0.97756	0.96131	0.996841
2-deoxycytidine	0.167388	0.302344	0.226461	0.328688	0.0635681	0.912665	0.878794	1.0065	0.990846	0.996841
2-Hydroxybutyric acid	0.000503705	0.00766162	0.75639	2.19265	0.00318026	2.43083	0.00196975	0.653526	0.0768503	0.764434
2-Hydroxyglutarate	0.406377	0.552353	0.187384	0.772413	0.384894	1.38092	0.308255	0.828787	0.524959	0.905138
2-methylglutaconic acid	0.224345	0.376952	0.17177	0.445022	0.0924321	1.14195	0.784943	1.13928	0.776174	0.934253
2-oxoadipate	0.00129266	0.0149432	0.177511	1.8483	0.0410658	3.25826	0.00104376	0.809461	0.453791	0.905138
2-oxoglutarate(2-)	0.00178966	0.0175973	0.114092	0.496108	0.000845891	0.749475	0.127845	0.865143	0.403994	0.905138
3-dehydro-L-gulonate/D-glucuronate/L-iduronate	0.00182671	0.0175973	0.419238	1.75298	0.0197633	2.27473	0.00262139	0.941261	0.782316	0.934253
3-Deoxy-D-glycero-D-galacto-2-nonulosonic acid	7.05045e-08	1.01879e-05	0.845096	0.16371	7.40201e-07	0.174661	2.35841e-06	1.05482	0.814453	0.939178
3-hydroxy-isovaleryl carnitine	0.0438541	0.124253	0.657166	1.46664	0.0355004	1.31464	0.140558	0.859147	0.374222	0.905138
3-Hydroxy-N6N6N6-trimethyl-L-lysine	0.973488	0.976868	0.829098	0.976987	0.924555	1.05562	0.835652	0.71396	0.183716	0.905138
3-hydroxyanthranilate	0.377497	0.532179	0.194478	0.910215	0.57161	1.25606	0.20617	0.865442	0.388325	0.905138
3-Hydroxybutyric acid	0.0692899	0.171682	0.256852	1.24219	0.423895	1.95459	0.0301093	0.595502	0.0682274	0.758374
3-Hydroxybutyrylcarnitine	0.0155225	0.0712063	0.824177	1.6303	0.0385482	1.75032	0.0271045	0.751626	0.205085	0.905138
3-hydroxyhexadecanoylcarnitine	0.521421	0.633155	0.560545	1.91309	0.272878	1.16669	0.802164	0.792265	0.688629	0.905138
3-Keto-beta-D-galactose/L-Gulonolactone	0.0578012	0.153253	0.129488	1.14017	0.681018	2.37032	0.0200934	0.844801	0.597832	0.905138
3-methyl-2-oxobutanoate	0.0547244	0.146438	0.0365634	0.804765	0.0218248	1.06911	0.469431	0.888758	0.185066	0.905138
3-methyl-2-oxopentanoate/4-methyl-2-oxopentanoate(ketoleucine)	0.115115	0.242835	0.947769	1.29563	0.114893	1.27631	0.157862	0.862275	0.353439	0.905138
3-oxo-10(R)-hydroxy-octadeca-6E8E12Z-trienoate/3-oxo-10(S)-hydroxy-octadeca-6E8E12Z-trienoate	0.238026	0.384298	0.656018	1.12038	0.36235	1.21388	0.15173	0.903851	0.416531	0.905138
3-oxo-6(R)-hydroxy-tetradec-8-cis-enoate/3-oxo-6(S)-hydroxy-tetradec-8Z-enoate	0.528513	0.639081	0.7076	1.24281	0.308426	1.10791	0.646096	0.912638	0.663809	0.905138
3-oxo-8(R)-hydroxy-hexadeca-6E10Z-dienoate/3-oxo-8(S)-hydroxy-hexadeca-6E10Z-dienoate	0.538575	0.640527	0.273906	0.478719	0.45589	2.35521	0.414529	0.648255	0.658854	0.905138
3-Ureidoisobutyrate/Glycylsarcosine	0.134465	0.273665	0.243906	0.63236	0.0511625	0.926882	0.745196	0.99063	0.965851	0.996841
3(S)10(R)-OH-octadeca-6-trans-412-cis-trienoate	0.0109512	0.0565159	0.988934	1.70538	0.0213273	1.69812	0.0296046	0.761004	0.208248	0.905138
3(S)6(R)-dihydroxy-tetradec-8Z-enoate/3(S)6(S)-dihydroxy-tetradec-8Z-enoate	0.601535	0.679723	0.895417	1.11986	0.418701	1.09054	0.557303	0.956757	0.749871	0.920477
4-hydroperoxy-2-nonenal	0.00633705	0.0406316	0.521075	1.25421	0.0380851	1.37976	0.00815192	0.87405	0.196555	0.905138
4-hydroxy-2-nonenal/3,4-epoxynonanal	0.154704	0.298063	0.218427	1.03259	0.776339	1.27081	0.0595652	0.821822	0.0970226	0.80113
4-hydroxybenzoate/Gentisate aldehyde	0.60381	0.679723	0.742094	0.873466	0.643572	0.759351	0.379293	1.11229	0.715491	0.905138
4-Imidazolone-5-propanoate	0.00338617	0.0287825	0.0730065	0.243864	0.00121559	0.661114	0.288883	0.77907	0.492495	0.905138
4(R)-hydroxy-dodec-6Z-enoate/4(S)-hydroxy-dodec-6Z-enoate	0.0597002	0.155436	0.572389	1.88183	0.0397156	1.48596	0.203322	0.688782	0.203989	0.905138
5-Hydroxyindoleacetate	0.641241	0.707324	0.384262	0.734978	0.404072	1.17426	0.678782	0.77998	0.498966	0.905138
5-Hydroxyisourate	6.15996e-06	0.000356046	0.112736	0.151677	8.12898e-06	0.305283	0.00134377	0.987539	0.965465	0.996841
5-Methoxyindoleacetate	0.401151	0.552353	0.185948	0.568205	0.307312	1.67457	0.377849	0.785725	0.658546	0.905138
5-Methylthioadenosine	0.0159441	0.0714724	0.686915	0.438699	0.0513064	0.347492	0.0216983	1.52679	0.29391	0.905138
5-oxoproline/L-1-Pyrroline-3-hydroxy-5-carboxylate	0.715852	0.771945	0.421282	0.933109	0.577689	1.08046	0.557585	0.882621	0.320964	0.905138
5-Phospho-beta-D-ribosylamine	0.153944	0.298063	0.170508	0.318924	0.0570415	1.02087	0.972441	0.756066	0.621316	0.905138
5,6-dihydrothymine	0.00965531	0.0526488	0.285299	0.680651	0.00549054	0.82453	0.146288	0.938462	0.60051	0.905138
6-Phosphogluconic acid	0.0100952	0.0540282	0.877686	2.08332	0.0165879	1.95783	0.0343961	1.2018	0.509808	0.905138
6(S)-hydroxy-tetradeca-2E4E8Z-trienoate/6(R)-hydroxy-tetradeca-2E4E8Z-trienoate	0.449886	0.572323	0.363878	1.00346	0.990621	1.48881	0.213796	0.69057	0.219622	0.905138
7,9-dihydro-1H-purine-2688(3H)-trione	0.000184827	0.00405378	0.054241	0.11051	9.41095e-05	0.394332	0.0531074	0.620676	0.271626	0.905138
8,11,14-Eicosatrienoic acid (DGLA)	0.0831926	0.200355	0.0944742	2.40928	0.0285454	0.93681	0.867639	1.15449	0.697848	0.905138
8(R)-hydroxy-hexadeca-2E4E6E10Z-tetraenoate/8(S)-hydroxy-hexadeca-2E4E6E10Z-tetraenoate	0.848349	0.887652	0.708874	1.00939	0.95748	1.11069	0.574392	0.691372	0.0491264	0.666509
9,10-hydroxyoctadec-12(Z)-enoate/12,13-hydroxyoctadec-9(Z)-enoate	0.000383823	0.00616248	0.835265	1.79863	0.00218887	1.88912	0.00185876	0.940426	0.704942	0.905138
9(10)-EpOME/12(13)-EpOME	0.00361444	0.0298449	0.408101	2.88657	0.00324865	1.98158	0.0504647	0.892989	0.714161	0.905138
acetamidopropanal	0.0972534	0.221309	0.0695579	0.942858	0.689723	1.42332	0.0360647	0.961566	0.789991	0.935686
acetoacetate	0.160678	0.29853	0.0604771	0.780678	0.155582	1.27432	0.187733	0.70628	0.053044	0.666509
acetylcarnosine	3.80493e-13	1.09963e-10	0.867999	0.000779444	8.75411e-12	0.000709055	1.69094e-11	1.09927	0.808665	0.939178
acetylcholine/4-(trimethylammonio)butanoate	0.450997	0.572323	0.720994	0.882519	0.522035	0.797631	0.281057	1.53587	0.0398225	0.643557
adenine	0.107576	0.233849	0.0471474	0.638883	0.063195	1.29161	0.297033	0.694643	0.123565	0.847173
adenosine diphosphate ribose	0.0207217	0.0783597	0.683207	0.55352	0.0207535	0.63597	0.0819842	0.870242	0.552814	0.905138
adipic acid	0.0656195	0.167823	0.718242	0.757934	0.13195	0.69046	0.063064	1.11119	0.553518	0.905138
ADP	0.0293268	0.0973279	0.129083	0.502676	0.00998644	0.868119	0.576206	0.863318	0.5383	0.905138
ADP-mannose/GDP-L-fucose/ADP alpha-D-glucoside	0.0107603	0.0565159	0.879096	1.5009	0.0265918	1.55787	0.0230683	1.31914	0.114254	0.810161
ADP-ribose	0.0208065	0.0783597	0.683067	0.553384	0.020814	0.635942	0.0822287	0.869945	0.552238	0.905138
adrenochrome/N-benzoylglycinate	0.0766139	0.187639	0.567113	0.489821	0.0481371	0.650035	0.239764	1.13025	0.71722	0.905138
alpha-D-glucose	0.27889	0.424207	0.201312	0.439041	0.121031	1.16477	0.777939	1.23303	0.681675	0.905138
alpha-linolenyl carnitine/gamma-linolenyl carnitine	0.537299	0.640527	0.297887	1.51928	0.331084	0.789522	0.600412	0.826389	0.653537	0.905138
AMP	0.193029	0.332055	0.0747682	0.808646	0.184322	1.23818	0.206701	0.866062	0.361016	0.905138
arachidonic acid	0.451521	0.572323	0.758377	1.49055	0.276489	1.26838	0.53551	0.750818	0.43011	0.905138
arginine	0.360372	0.513041	0.432577	1.44751	0.166257	1.07362	0.795769	1.31043	0.304303	0.905138
aspartate	0.0114316	0.0569609	0.54098	0.521041	0.0102948	0.63815	0.0761492	1.0009	0.996841	0.996841
ATP	0.030372	0.0986237	0.34667	0.342918	0.0158422	0.598829	0.238286	0.81403	0.608796	0.905138
Azelaic acid	0.227658	0.378121	0.43885	0.71249	0.104571	0.894475	0.599914	1.08835	0.672251	0.905138
benzoate	0.804499	0.85478	0.602003	0.984362	0.939944	1.1549	0.519273	1.13556	0.545906	0.905138
beta-D-Fructose 1,6-bisphosphate	0.0695045	0.171682	0.395989	0.434932	0.0343506	0.685983	0.336285	0.987825	0.973133	0.996841
beta-hydroxy-beta-methylbutyrate	0.0165697	0.0714724	0.0566394	1.0983	0.65257	2.03049	0.00515258	0.719539	0.127697	0.847173
bilirubin	0.996275	0.996275	0.937564	1.02525	0.976234	0.931776	0.936577	0.593175	0.535419	0.905138
Biotin	0.13274	0.273665	0.296474	0.114714	0.0534189	0.584712	0.631338	0.723208	0.75804	0.920477
butyryl carnitine	0.601295	0.679723	0.971707	1.32206	0.481812	1.34923	0.476862	0.892672	0.773289	0.934253
C14H24O3(4)	0.0685404	0.171682	0.46715	2.04131	0.0378533	1.45177	0.279675	0.752699	0.378958	0.905138
C16H26O3(4)	0.724689	0.778569	0.797823	1.14124	0.709249	1.30246	0.484583	0.862571	0.676677	0.905138
C18H32O4(3)	0.00116306	0.0140052	0.996446	1.53244	0.0039254	1.53371	0.00577694	1.0196	0.879079	0.962325
C20H28O(5)	0.00578014	0.0406316	0.223631	2.15203	0.00312488	1.43756	0.137394	0.968162	0.884002	0.964063
C20H28O2(7)	0.0296362	0.0973279	0.914479	1.46075	0.0395932	1.42216	0.0669861	0.893457	0.51301	0.905138
C20H30O2(4)	0.0260039	0.089815	0.300453	2.02269	0.0127767	1.36984	0.252468	0.819506	0.437041	0.905138
C20H30O3(6)	0.602025	0.679723	0.992031	1.16486	0.471559	1.16843	0.488414	0.755772	0.195395	0.905138
C20H30O4(18)	0.548826	0.648189	0.365396	0.692812	0.293913	1.09649	0.800383	0.742281	0.391034	0.905138
C20H32O3(12)	0.407097	0.552353	0.828271	1.40738	0.270567	1.27839	0.450293	0.854501	0.606329	0.905138
C20H32O4(21)	0.428072	0.559787	0.200329	0.80228	0.390158	1.30451	0.330024	0.716303	0.200105	0.905138
C27H44O2(5)	0.000356701	0.00606392	0.251062	1.97095	0.009973	2.94197	0.000496341	0.950874	0.829706	0.939178
C27H44O3(5)	0.0809354	0.196557	0.779998	1.60499	0.0686734	1.45225	0.165373	0.923374	0.745601	0.920477
C4H6O3(3)	0.236469	0.384298	0.158444	0.483939	0.102821	1.195	0.693339	1.06043	0.890173	0.967143
C4H9NO2(4)	0.0253827	0.0894584	0.0519906	1.02824	0.85718	1.64195	0.0077227	0.583006	0.00292632	0.224658
C5H10O5(6)	0.303248	0.447137	0.203208	0.448266	0.13723	1.2078	0.732435	1.22311	0.699043	0.905138
C6H11NO3(4)	0.000607653	0.00878058	0.0927451	0.490764	0.000315681	0.732751	0.07486	0.719654	0.0484444	0.666509
C6H12O6(5)	0.00872286	0.048479	0.144086	0.513789	0.0035413	0.792321	0.27281	0.892917	0.565622	0.905138
C9H8O3(3)	0.531397	0.639891	0.268965	0.860425	0.459481	1.19843	0.402306	1.11058	0.604054	0.905138
caprate	0.0894099	0.207443	0.104705	0.897543	0.0308024	1.00609	0.901177	0.871427	0.00836237	0.30209
carnosine	0.00621679	0.0406316	0.100852	0.516738	0.00230268	0.817904	0.309564	0.739665	0.114936	0.810161
CDP-ethanolamine	0.00332713	0.0287825	0.0058285	0.9466	0.762763	2.18325	0.000902133	0.436951	0.000322046	0.0465356
CDPcholine	0.0253681	0.0894584	0.0342278	0.970895	0.896453	2.07126	0.00767701	0.469008	0.00401526	0.224658
cholesterol sulfate	3.98743e-06	0.000288092	0.477568	1.80822	9.18942e-05	2.03682	2.51117e-05	0.77264	0.0361725	0.643557
choline	0.0853954	0.203481	0.0294582	0.754542	0.0946098	1.31264	0.125002	0.69313	0.0347049	0.643557
choline phosphate	0.403477	0.552353	0.225739	0.712854	0.217636	1.1571	0.608585	0.736408	0.262877	0.905138
cis-aconitate	0.50559	0.619357	0.687194	0.870315	0.600555	0.745043	0.302152	1.13739	0.62725	0.905138
citr_L[e]	0.0178664	0.0752013	0.185292	4.11484	0.00729041	1.63489	0.325629	0.98483	0.973704	0.996841
citrate/isocitrate	0.513537	0.626212	0.760641	0.79139	0.547122	0.666486	0.329821	1.07661	0.848499	0.943139
clupanodonic acid/docosa-4,7,10,13,16-pentaenoic acid	0.399318	0.552353	0.230346	1.92681	0.209246	0.774721	0.637177	1.03245	0.949912	0.996841
CMP-N-acetyl-beta-neuraminate	0.0367777	0.116647	0.431696	0.652929	0.0214907	0.794036	0.210232	1.1962	0.297852	0.905138
Coenzyme A	0.688026	0.747517	0.599544	1.09025	0.893902	1.79409	0.400603	0.530152	0.334938	0.905138
coumarin	0.850794	0.887652	0.603564	0.960844	0.837238	1.11385	0.602543	1.16244	0.44315	0.905138
creatine	0.0897243	0.207443	0.57552	0.809612	0.215978	0.706365	0.0633991	1.1843	0.317237	0.905138
creatinine	0.108032	0.233849	0.178987	0.544355	0.0385719	0.944653	0.844055	0.833484	0.50742	0.905138
Cystathionine	0.552863	0.649501	0.621811	1.09875	0.71315	1.32144	0.312363	0.733567	0.236664	0.905138
Cystine	0.468691	0.58892	0.47876	1.80036	0.230464	1.09402	0.859488	1.29113	0.59498	0.905138
cytosine	0.0401049	0.118269	0.340388	0.434501	0.0197372	0.687313	0.285915	0.878397	0.690592	0.905138
D-Alanyl-D-alanine	0.795467	0.848302	0.950067	1.11893	0.598794	1.09742	0.680969	0.673547	0.0781794	0.764434
D-Erythrose 4-phosphate	0.595213	0.679723	0.538092	0.683706	0.318838	0.959353	0.916914	1.01338	0.971728	0.996841
D-Glucosamine	0.247665	0.39327	0.178623	0.327147	0.105429	1.24181	0.757202	1.28445	0.704893	0.905138
D-Glucosamine 6-phosphate	0.471216	0.589529	0.313211	1.57045	0.238646	0.897507	0.78541	0.740168	0.426118	0.905138
D-Glucuronate 1-phosphate	0.0224845	0.0822534	0.320571	0.385091	0.0117766	0.634019	0.216476	0.600273	0.146128	0.905138
D-Glycerate 3-phosphate/D-Glycerate 2-phosphate	0.317156	0.46292	0.390058	0.576354	0.140685	0.910341	0.805984	0.811213	0.563586	0.905138
decanoyl carnitine	0.892371	0.917777	0.880094	0.860218	0.669434	0.929391	0.844427	0.828455	0.594263	0.905138
decenoyl carnitine	0.273574	0.418322	0.75363	0.666665	0.341483	0.550022	0.192207	1.28821	0.548672	0.905138
Dihydroxyacetone phosphate	0.47369	0.590071	0.824235	0.739466	0.309368	0.812765	0.506017	1.11269	0.714923	0.905138
Diphosphate	0.32291	0.468949	0.197484	0.900144	0.730058	1.62103	0.148813	0.643685	0.161631	0.905138
docosahexaenoate(DHA)	0.00744528	0.0438186	0.296857	3.71386	0.00456452	1.99647	0.118777	0.747473	0.471431	0.905138
Dodecanedioic acid	0.235906	0.384298	0.601819	1.20913	0.12933	1.10293	0.447153	0.92689	0.530774	0.905138
dopaminochrome	0.305658	0.448402	0.156545	0.695871	0.167757	1.19874	0.50486	0.657624	0.114532	0.810161
Eicosenoic acid	0.0384279	0.116902	0.488978	2.16988	0.0244844	1.57508	0.187054	0.814837	0.518678	0.905138
Elaidic carnitine/Vaccenyl carnitine	0.602164	0.679723	0.546584	0.935235	0.865744	0.659005	0.328543	0.848167	0.678296	0.905138
Flavin adenine dinucleotide oxidized	0.49806	0.615126	0.299857	0.815166	0.272047	1.07917	0.694213	0.873637	0.462661	0.905138
fructoselysine 3-phosphate	0.000857883	0.0118061	0.0395636	0.425667	0.000304886	0.776856	0.213105	0.650601	0.0330049	0.643557
fructosyllysine	0.325316	0.470082	0.170105	0.565807	0.17704	1.31661	0.52864	0.552086	0.160193	0.905138
fumarate	0.000154932	0.00405378	0.486279	0.342771	0.000309908	0.435417	0.0038803	0.921392	0.726726	0.909194
G6P/F6P	0.054688	0.146438	0.287395	0.306179	0.0234926	0.651298	0.402686	1.117	0.81685	0.939178
gama-L-glutamyl-L-alanine/5-L-Glutamyl-L-alanine-1	0.161804	0.29853	0.12472	0.272448	0.0639076	1.27216	0.731849	0.633166	0.492789	0.905138
gama-L-glutamyl-L-alpha-aminobutyrate	0.287291	0.430192	0.192739	1.46534	0.128689	0.913622	0.72502	1.26522	0.337894	0.905138
GDP-D-mannose	0.811456	0.859014	0.577388	0.870564	0.544555	1.04814	0.845494	0.97373	0.906796	0.981514
glutaryl carnitine	8.25739e-05	0.00265154	0.31056	0.353463	0.00226373	0.229183	0.000190577	1.45357	0.20638	0.905138
glutathione	0.91198	0.930415	0.703175	1.06448	0.693573	0.974737	0.87882	1.14628	0.393981	0.905138
Glycerol	1.61007e-07	1.55104e-05	0.16197	0.00365293	4.60044e-07	0.0152681	2.85742e-05	1.02784	0.967705	0.996841
Glycerol 3-phosphate	0.162177	0.29853	0.224187	0.535754	0.0613373	0.947641	0.871677	1.12776	0.70228	0.905138
glycine	0.423759	0.559064	0.386949	0.777544	0.197654	0.990886	0.963724	0.984269	0.933427	0.996841
glycine betaine	0.0858986	0.203481	0.319172	0.704618	0.0367911	0.886327	0.467905	0.709424	0.0400831	0.643557
Glycyl-phenylalanine	0.606812	0.679723	0.364562	0.757339	0.366424	1.13752	0.689719	0.770054	0.395076	0.905138
Glycylleucine	0.00209186	0.0195015	0.370366	1.59378	0.0255626	2.05293	0.00259323	0.721241	0.102742	0.810161
Glycylproline/L-Prolinylglycine	0.000354154	0.00606392	0.920489	1.96279	0.00174897	2.01504	0.00205042	0.923566	0.660655	0.905138
GSSG	0.0418581	0.119772	0.457016	0.653988	0.0248926	0.790563	0.213147	1.2039	0.293351	0.905138
Guanine	0.112685	0.239455	0.0412841	0.754825	0.101487	1.27544	0.175263	0.797255	0.180258	0.905138
gulonate	0.00758108	0.0438186	0.0986919	1.3693	0.261026	2.73152	0.00308884	0.861929	0.588958	0.905138
heptadecanoyl carnitine	0.287048	0.430192	0.454654	2.09483	0.133217	1.24398	0.664851	0.996114	0.993441	0.996841
Hexadecanedioic acid	0.303081	0.447137	0.966288	1.23705	0.271911	1.25159	0.274409	0.804715	0.262229	0.905138
Hypotaurine	0.101195	0.226707	0.375198	0.388749	0.0460934	0.693576	0.439638	0.651129	0.339115	0.905138
isoputreanine/putreanine	0.237351	0.384298	0.108064	0.740139	0.145283	1.20566	0.382208	0.762781	0.187064	0.905138
itaconate/Mesaconate	0.27001	0.417288	0.126704	0.829674	0.465922	1.49416	0.150057	0.830358	0.467858	0.905138
kynurenate	0.176845	0.309747	0.113844	0.386113	0.0757912	1.30928	0.617982	0.897866	0.831937	0.939178
L-2-aminoadipate	0.0126605	0.0599819	0.82591	2.77262	0.0180483	2.44591	0.0443548	0.63067	0.248882	0.905138
L-4-hydroxyglutamate semialdehyde	0.854802	0.888081	0.693255	0.997955	0.991423	0.894179	0.58176	1.11823	0.559672	0.905138
L-alanine	0.367179	0.52017	0.174264	0.813115	0.241594	1.15711	0.430168	0.901266	0.549299	0.905138
L-Alanyl-L-leucine	0.0889289	0.207443	0.0306344	0.682708	0.103569	1.46872	0.120632	0.603992	0.0369719	0.643557
L-arabinitol/xylitol/D-ribitol	0.000196377	0.00405378	0.431504	2.13456	0.00317847	2.75401	0.000499294	0.829492	0.400885	0.905138
L-asparagine	0.153056	0.298063	0.602072	0.781032	0.0892044	0.868018	0.34202	1.07349	0.609663	0.905138
L-cysteate	0.0112385	0.0569609	0.0782176	1.40294	0.407842	4.19567	0.00395253	0.791331	0.564852	0.905138
L-erythrulose	0.287176	0.430192	0.20952	0.439634	0.124876	1.15547	0.79123	1.23491	0.682338	0.905138
L-Fucose 1-phosphate	0.026834	0.0912356	0.173241	0.48934	0.0101224	0.812119	0.432098	0.663633	0.112261	0.810161
L-glutamate	0.857352	0.888081	0.707948	0.993682	0.973473	0.895239	0.585981	1.11435	0.572063	0.905138
L-glutamine	0.134271	0.273665	0.24457	0.632726	0.0511202	0.926376	0.743073	0.991571	0.969247	0.996841
L-histidine	0.179769	0.312972	0.304286	0.677014	0.0726299	0.926066	0.72499	1.01482	0.942904	0.996841
L-Iditol/D-glucitol/galactitol	0.21439	0.36662	0.266048	0.398843	0.0851863	0.923826	0.88294	1.25264	0.657995	0.905138
L-isoleucine/L-leucine	0.549502	0.648189	0.288949	0.856727	0.384399	1.12968	0.515439	0.785717	0.182633	0.905138
L-kynurenine/Formyl-5-hydroxykynurenamine	0.592656	0.679723	0.342222	0.732898	0.368831	1.18387	0.641979	0.771528	0.45131	0.905138
L-methionine	0.253388	0.397984	0.105297	0.778388	0.203031	1.24907	0.282781	0.816331	0.297966	0.905138
L-palmitoylcarnitine	0.398796	0.552353	0.759365	0.723643	0.448679	0.598979	0.263299	0.769184	0.53742	0.905138
L-phenylalanine	0.222457	0.375965	0.112734	0.694826	0.116628	1.18874	0.467501	0.767603	0.245161	0.905138
L-proline	0.0988517	0.223189	0.0687388	0.939077	0.672294	1.42418	0.0370628	0.96326	0.800733	0.939178
L-serine	0.00146376	0.0162702	0.182425	0.484122	0.000911054	0.693178	0.0686295	0.851478	0.375751	0.905138
L-threonine	0.41766	0.559064	0.277558	0.806385	0.203974	1.05224	0.771043	0.923618	0.630942	0.905138
L-tryptophan	0.441857	0.570074	0.212154	0.870431	0.451287	1.22395	0.305083	0.898338	0.559063	0.905138
L-tyrosine	0.914318	0.930415	0.740989	0.991535	0.966366	1.09289	0.678753	1.17104	0.438276	0.905138
L-xylonate/L-lyxonate	0.0124839	0.0599819	0.184942	0.496175	0.0053645	0.76778	0.265778	0.835933	0.418737	0.905138
lactate	0.244702	0.390712	0.250236	0.656394	0.0988209	0.99613	0.98801	0.997907	0.993128	0.996841
laurate	0.419613	0.559064	0.810695	1.14713	0.27276	1.09902	0.471697	0.86737	0.256295	0.905138
lauroyl carnitine	0.825309	0.870103	0.592732	1.27735	0.561688	0.919604	0.850634	0.910358	0.822946	0.939178
linoleic acid/linoelaidic acid (all trans C18:2)/octadecadienoate (n-C18:2)	0.110036	0.235559	0.402706	2.78102	0.0515458	1.51562	0.430162	0.823035	0.692791	0.905138
Linoleyl carnitine/Linoelaidyl carnitine	0.93533	0.945799	0.72102	1.10506	0.782326	0.915316	0.817457	0.717615	0.364926	0.905138
lysine	0.160312	0.29853	0.455571	1.33038	0.410092	1.93793	0.0838581	0.6363	0.199556	0.905138
malate(2-)	0.000183988	0.00405378	0.554606	0.341638	0.000405808	0.421175	0.00370675	0.927377	0.755325	0.920477
margarate	0.0450115	0.126294	0.327643	1.95336	0.0212767	1.33038	0.317694	0.993232	0.979537	0.996841
Methionine sulfoxide	0.782349	0.837403	0.842755	0.755282	0.537518	0.86088	0.755211	0.925641	0.864403	0.953483
methyl indole-3-acetate	0.157044	0.29853	0.101261	0.652206	0.0665555	1.13026	0.600916	0.78678	0.284463	0.905138
Methylimidazoleacetic acid	0.538318	0.640527	0.332644	0.698713	0.298119	1.13529	0.724097	0.801581	0.516179	0.905138
Methylisocitric acid/2-methylcitrate	0.0625704	0.161454	0.119421	0.615878	0.0207415	0.967383	0.869845	0.640724	0.0314188	0.643557
myo-inositol	0.00866188	0.048479	0.128547	0.512396	0.00336007	0.804065	0.301542	0.849423	0.409063	0.905138
myristate	0.166168	0.302029	0.516474	1.41694	0.0857913	1.17932	0.424715	0.91223	0.634848	0.905138
N-acetyl-L-aspartate/2-Amino-3-oxoadipate	0.423426	0.559064	0.778814	0.620097	0.265856	0.736743	0.496683	1.18925	0.681022	0.905138
N-acetyl-L-glutamate	0.00672768	0.0413681	0.0809065	1.45115	0.289362	3.65913	0.0025845	0.499872	0.0587705	0.679387
N-acetyl-seryl-aspartate	0.174368	0.308511	0.421549	0.758711	0.0798606	0.905672	0.534659	0.96455	0.809345	0.939178
N-Formimidoyl-L-glutamate	0.12979	0.269851	0.0506558	0.782691	0.268623	1.51515	0.0861334	0.693116	0.106236	0.810161
N-Ribosylnicotinamide	0.935981	0.945799	0.733988	1.0707	0.879339	0.856448	0.745784	0.994688	0.990553	0.996841
N(2)-acetyl-L-ornithine	0.00434083	0.0339054	0.783991	2.16908	0.00742317	1.95904	0.0229807	1.04089	0.874963	0.961462
N(omega)-(L-Arginino)succinate	0.55618	0.650753	0.796549	1.29392	0.351868	1.16775	0.593637	0.945167	0.836276	0.939208
N2-Formyl-N1-(5-phospho-D-ribosyl)glycinamide	1.02243e-05	0.000422116	0.0766763	512.929	1.02008e-05	35.7176	0.00318213	2.31089	0.397367	0.905138
N6N6N6-Trimethyl-L-lysine	0.685063	0.747107	0.396295	0.899267	0.614043	1.16912	0.485835	0.832676	0.388446	0.905138
NAD+	0.0280852	0.0943793	0.548291	0.562987	0.103406	0.41848	0.0255414	2.63765	0.0103984	0.333903
NADH	0.107563	0.233849	0.104953	1.05295	0.92106	0.290464	0.0378974	5.66507	0.00406071	0.224658
NADP+	0.0936936	0.2149	0.204789	0.512726	0.0341945	0.892326	0.713202	1.26408	0.426543	0.905138
naphthalene	0.0219124	0.0811883	0.973209	1.43745	0.0348382	1.4263	0.0491478	0.822953	0.231911	0.905138
NeuNGc	0.505772	0.619357	0.259255	0.778864	0.347057	1.20941	0.496897	0.85722	0.558484	0.905138
niacinamide	0.051372	0.141395	0.264769	0.592739	0.0214044	0.836018	0.419968	0.852571	0.445664	0.905138
Nicotinamide	0.0525277	0.143212	0.258926	0.590866	0.0216126	0.839398	0.433865	0.844787	0.424083	0.905138
nicotinamide nucleotide	0.00646732	0.0406316	0.906476	0.513542	0.0124306	0.534971	0.0238952	1.52536	0.0921708	0.80113
nonanoate	0.0241091	0.0870943	0.0209319	0.846696	0.00846247	1.04102	0.500867	0.833256	0.00466418	0.224658
O-acetylcarnitine	0.402374	0.552353	0.906162	0.722163	0.36893	0.679149	0.31565	1.19858	0.613727	0.905138
octanoyl carnitine/L-Octanoylcarnitine	0.827953	0.870103	0.755864	0.938745	0.867872	0.790073	0.560864	1.09145	0.817925	0.939178
oleic acid/elaidate/trans-vaccenate	0.102345	0.227522	0.275608	2.39153	0.0406639	1.25844	0.585908	0.925509	0.845037	0.942918
omega hydroxy dodecanoate (n-C12:0)	0.0165652	0.0714724	0.260126	2.55271	0.0080922	1.51145	0.224217	0.714571	0.29121	0.905138
omega hydroxy hexadecanoate (n-C16:0)	0.0205911	0.0783597	0.527583	1.70357	0.0159341	1.41598	0.115254	0.799527	0.271869	0.905138
omega hydroxy tetradecanoate (n-C14:0)	0.00622706	0.0406316	0.273755	2.70841	0.00375001	1.67326	0.115859	0.679227	0.203349	0.905138
Ornithine	0.00737317	0.0438186	0.960577	2.59893	0.0173117	2.66782	0.0204668	0.698587	0.331051	0.905138
palmitate	0.6172	0.686041	0.620822	1.29058	0.345917	1.06405	0.826332	0.869114	0.600389	0.905138
palmitoleate	0.231008	0.381494	0.335596	1.80952	0.096516	1.11404	0.765	0.853931	0.643659	0.905138
pendtadenoyl carnitine	0.446315	0.572323	0.474635	2.28822	0.217047	1.15147	0.838789	1.28923	0.698057	0.905138
pentadecanoate	0.594181	0.679723	0.753546	1.24115	0.363033	1.11482	0.662679	0.939135	0.788814	0.935686
Perillic acid	0.422979	0.559064	0.763292	0.840555	0.261333	0.898378	0.507495	0.916224	0.565296	0.905138
perillyl aldehyde	0.020431	0.0783597	0.877777	1.28813	0.0282223	1.25787	0.0556736	0.82335	0.0819981	0.764434
phenylacetaldehyde	0.425585	0.559064	0.277155	0.796943	0.210806	1.06019	0.755319	1.27982	0.175769	0.905138
Phosphodimethylethanolamine	0.160061	0.29853	0.140698	0.34653	0.0611105	1.1356	0.821952	0.292394	0.0329476	0.643557
Phosphoenolpyruvate	0.431386	0.561579	0.351537	0.582452	0.20264	1.02852	0.948762	0.793909	0.577859	0.905138
phytanic acid/arachidic acid	0.108428	0.233849	0.203513	2.18496	0.0395468	1.11587	0.769673	1.2055	0.597744	0.905138
pristanic acid	0.0124048	0.0599819	0.266188	2.79586	0.00645863	1.61697	0.183929	1.09724	0.779318	0.934253
propionyl-carnitine	0.00028906	0.00556922	0.299957	1.8235	0.00681728	2.46134	0.000485891	1.07797	0.700735	0.905138
Pyridoxal	0.264528	0.411728	0.115459	0.744881	0.183002	1.24526	0.342516	0.649217	0.0585218	0.679387
Pyridoxine/Norepinephrine-1	0.00281657	0.0254372	0.920573	1.92613	0.00895474	1.98934	0.0095624	0.948754	0.812944	0.939178
pyruvate	0.0208778	0.0783597	0.197215	0.503519	0.0085686	0.786943	0.33545	0.891414	0.619955	0.905138
quinolinate	0.0377622	0.116902	0.13515	1.24341	0.520845	2.66616	0.0137279	0.597149	0.140553	0.90266
Riboflavin	0.164042	0.300052	0.105676	0.531203	0.069807	1.19792	0.606941	0.594189	0.128981	0.847173
ribose-phosphate	0.148024	0.293006	0.158084	0.62713	0.0546117	1.01831	0.940078	0.88763	0.602147	0.905138
S-(2-Methylpropanoyl)-dihydrolipoamide	1.4191e-05	0.000512649	0.748952	0.201511	0.000161475	0.173001	0.000117998	1.23331	0.523496	0.905138
S-[2-carboxy-1-(1 H-imidazol-4-yl)ethyl]-L-cysteine	0.658478	0.720834	0.778828	1.14469	0.662353	1.29899	0.428946	1.26997	0.443069	0.905138
S-Adenosyl-L-homocysteine	0.00152792	0.0163544	0.0530563	1.33107	0.157528	2.39748	0.000646134	0.663487	0.049737	0.666509
S-adenosyl-L-methionine	0.0364258	0.116647	0.999276	0.434975	0.0531261	0.434743	0.0662926	1.27952	0.543545	0.905138
sedoheptulose 1,7-bisphosphate	0.00599558	0.0406316	0.544804	0.188368	0.00626926	0.302845	0.0489753	0.896692	0.838463	0.939208
Sedoheptulose 7-phosphate	0.0668036	0.169353	0.451508	0.43917	0.0361838	0.657176	0.285915	1.14518	0.710004	0.905138
sn-Glycero-3-phosphocholine	0.0414129	0.119772	0.750385	0.606703	0.0898037	0.532659	0.0478045	1.46019	0.189669	0.905138
stearate	0.0415869	0.119772	0.302861	1.71684	0.0190521	1.24666	0.328413	0.987251	0.9511	0.996841
stearoylcarnitine	0.302067	0.447137	0.27742	1.4747	0.128042	0.992293	0.976267	0.84537	0.496706	0.905138
succinate(2-)	0.0381708	0.116902	0.0943327	0.524314	0.0121354	0.945431	0.818429	0.798054	0.334971	0.905138
Taurine	0.160794	0.29853	0.0615366	0.719666	0.140027	1.34032	0.210538	0.614633	0.0358417	0.643557
Taurodeoxycholic acid/taurochenodeoxycholate	0.226535	0.378121	0.205137	0.557344	0.0906116	1.04034	0.909684	0.994296	0.986113	0.996841
taurolithocholate	0.171158	0.307234	0.0853414	0.402341	0.0885602	1.53999	0.428186	0.680748	0.45366	0.905138
tetradecanoyl carnitine(myristoyl carnitine)	0.643741	0.707381	0.754496	1.36838	0.669984	1.9129	0.410005	0.260074	0.0816275	0.764434
tetradecenoate (n-C14:1)	0.0193609	0.0777124	0.203846	2.44547	0.00815196	1.38522	0.311745	0.910184	0.752885	0.920477
thiosulfate	0.615086	0.686041	0.342058	0.792358	0.607256	1.49383	0.40678	0.729562	0.48784	0.905138
thymine/imidazol-4-ylacetate	0.907095	0.929612	0.987203	0.894013	0.760113	0.886388	0.756664	1.33319	0.437219	0.905138
tiglyl carnitine	0.954788	0.961442	0.768667	0.933764	0.808965	1.0545	0.859845	0.753734	0.326149	0.905138
trans-4,5-epoxy-2(E)-decenal	0.00510304	0.0378148	0.536125	1.58117	0.031261	1.88923	0.00716477	0.545128	0.00665619	0.274806
trans-Hexadec-2-enoyl carnitine	0.698055	0.755573	0.43998	1.45163	0.446198	0.836772	0.729233	0.829284	0.699886	0.905138
Trimethylamine N-oxide	0.143512	0.288021	0.312145	0.355797	0.0586206	0.768302	0.629717	1.59607	0.369091	0.905138
UDP-alpha-D-xylose	0.00018052	0.00405378	0.475051	0.178274	0.00262228	0.106891	0.00051518	2.40738	0.086507	0.781266
UDP-D-glucose/UDP-D-galactose	0.00102704	0.0129139	0.459108	0.377989	0.00133284	0.497192	0.0177494	1.28727	0.323691	0.905138
UDP-D-glucuronate	0.271766	0.417768	0.233068	0.558957	0.113163	1.04559	0.904839	0.798663	0.525348	0.905138
UDP-N-acetyl-alpha-D-glucosamine/UDP-N-acetyl-alpha-D-galactosamine	0.00397539	0.0319136	0.762449	0.556141	0.0066838	0.604714	0.022579	1.06948	0.7239	0.909194
uracil	0.45634	0.575905	0.492547	1.47179	0.224841	1.07618	0.823688	0.648809	0.176895	0.905138
Ureidopropionic acid/Glycyl-glycine	0.154143	0.298063	0.608589	0.782458	0.0905005	0.867679	0.339345	1.07663	0.594091	0.905138
Valine	0.891712	0.917777	0.837606	1.02718	0.865742	1.07703	0.660006	0.8567	0.336892	0.905138
w-hydroxydecanoicacid	0.172632	0.307968	0.579922	1.50061	0.0960124	1.24284	0.383946	0.665979	0.0955485	0.80113
Xanthine	0.11788	0.246864	0.779934	0.738441	0.0919439	0.791859	0.211089	0.98928	0.949819	0.996841
xanthosine	0.00579311	0.0406316	0.15073	0.258725	0.00255618	0.590984	0.204933	1.17331	0.675346	0.905138
