# Supplementary material for: Investigating RNA expression profiles altered by nicotinamide mononucleotide therapy in a chronic model of alcoholic liver disease
Source: Hum Genomics. 2019 Dec 10;13:65. doi: 10.1186/s40246-019-0251-1 (PMC6902345; doi:10.1186/s40246-019-0251-1)
Supplement: Supplementary file 3 — Additional file 3: Table S2: RNA-seq. [file 40246_2019_251_MOESM3_ESM.xlsx]

## Sheet: all tested protein coding genes
ensembl_gene	diffGavageEffect.stat	diffGavageEffect.pvalue	diffGavageEffect.padj	gavageEffect.stat	gavageEffect.pvalue	gavageEffect.padj	nmnEffect.stat	nmnEffect.pvalue	nmnEffect.padj	altEffect.stat	altEffect.pvalue	altEffect.padj	astEffect.stat	astEffect.pvalue	astEffect.padj	pEtOHEffect.stat	pEtOHEffect.pvalue	pEtOHEffect.padj	Gene.description	Chromosome	Gene.start..bp.	Gene.end..bp.	Strand	Gene.type	Transcript.count	Gene.name	EtOH_NMN_median	EtOH_Saline_median	Ctrl_NMN_median	Ctrl_Saline_median	EtOH_NMN_pctTC	EtOH_Saline_pctTC	Ctrl_NMN_pctTC	gavageEffect_Saline	gavageEffect_NMN	nmnEffect_Ctrl	nmnEffect_EtOH	description	EtOH_effect	diffEtOH_effect	NMN_effect	diffNMN_effect
ENSMUSG00000005413	102.95	3.43677e-24	3.59864e-20	638.229	2.57183e-139	3.59876e-135	194.452	5.96105e-43	8.3413e-39	44.8054	2.17626e-11	1.36214e-08	32.3041	1.31838e-08	4.11421e-06	73.6406	9.37165e-18	9.40044e-15	heme oxygenase 1 [Source:MGI Symbol;Acc:MGI:96163]	8	75093621	75100589	1	protein_coding	2	Hmox1	1396	6849	425	360	3.87778	19.025	1.18056	19.02	3.28	1.18	0.2	heme oxygenase 1	3.6e-135 (2.6e-139)	3.6e-20 (3.4e-24)	8.3e-39 (6.0e-43)	3.6e-20 (3.4e-24)
ENSMUSG00000032849	3.58563	0.0582813	0.600062	391.837	8.1984e-86	5.73601e-82	15.1216	0.000520455	0.0118585	7.91334	0.00490716	0.0522192	6.78847	0.00917486	0.0825384	37.0179	1.1705e-09	1.33637e-07	ATP-binding cassette, sub-family C (CFTR/MRP), member 4 [Source:MGI Symbol;Acc:MGI:2443111]	14	118482692	118706219	-1	protein_coding	6	Abcc4	628	1339	68	60	10.4667	22.3167	1.13333	22.32	9.24	1.13	0.47	ATP-binding cassette, sub-family C (CFTR/MRP), member 4	5.7e-82 ( 8.2e-86)	6.0e-01 (5.8e-02)	1.2e-02 (5.2e-04)	6.0e-01 (5.8e-02)
ENSMUSG00000022947	4.18278	0.0408366	0.541266	302.303	2.26884e-66	1.05826e-62	7.3235	0.0256875	0.151131	2.13342	0.144119	0.400251	1.66643	0.196738	0.477001	14.201	0.000164287	0.00263667	carbonyl reductase 3 [Source:MGI Symbol;Acc:MGI:1309992]	16	93683215	93690990	1	protein_coding	2	Cbr3	489	533	39	17	28.7647	31.3529	2.29412	31.35	12.54	2.29	0.92	carbonyl reductase 3	1.1e-62 ( 2.3e-66)	5.4e-01 (4.1e-02)	1.5e-01 (2.6e-02)	5.4e-01 (4.1e-02)
ENSMUSG00000032715	36.5109	1.51813e-09	3.97408e-06	262.665	9.18545e-58	3.2133e-54	46.1412	9.56254e-11	5.81776e-08	32.346	1.29021e-08	3.06313e-06	27.0424	1.99036e-07	3.82886e-05	73.4951	1.00887e-17	9.44508e-15	tribbles pseudokinase 3 [Source:MGI Symbol;Acc:MGI:1345675]	2	152337422	152344032	-1	protein_coding	3	Trib3	933	2610	332	176	5.30114	14.8295	1.88636	14.83	2.81	1.89	0.36	tribbles pseudokinase 3	3.2e-54 ( 9.2e-58)	4.0e-06 (1.5e-09)	5.8e-08 (9.6e-11)	4.0e-06 (1.5e-09)
ENSMUSG00000069170	4.50911	0.0337149	0.507804	174.591	1.22457e-38	3.0686e-35	16.5418	0.000255857	0.00739713	10.3674	0.00128258	0.0215642	10.2085	0.00139795	0.0244476	35.8586	2.12168e-09	2.2744e-07	adhesion G protein-coupled receptor V1 [Source:MGI Symbol;Acc:MGI:1274784]	13	81095068	81633154	-1	protein_coding	14	Adgrv1	43	11	176	270	0.159259	0.0407407	0.651852	0.04	0.24	0.65	3.91	adhesion G protein-coupled receptor V1	3.1e-35 ( 1.2e-38)	5.1e-01 (3.4e-02)	7.4e-03 (2.6e-04)	5.1e-01 (3.4e-02)
ENSMUSG00000025002	1.34228	0.246632	0.830381	174.448	1.31577e-38	3.0686e-35	1.68405	0.430837	0.686718	5.38529	0.0203073	0.126345	5.24639	0.0219923	0.137813	38.787	4.72672e-10	6.26201e-08	cytochrome P450, family 2, subfamily c, polypeptide 55 [Source:MGI Symbol;Acc:MGI:1919332]	19	39007019	39042693	1	protein_coding	1	Cyp2c55	313	355	53	26	12.0385	13.6538	2.03846	13.65	5.91	2.04	0.88	cytochrome P450, family 2, subfamily c, polypeptide 55	3.1e-35 ( 1.3e-38)	8.3e-01 (2.5e-01)	6.9e-01 (4.3e-01)	8.3e-01 (2.5e-01)
ENSMUSG00000058672	0.0123505	0.911511	0.989072	161.748	7.53262e-36	1.50577e-32	2.55156	0.279213	0.556794	2.47249	0.115854	0.352325	2.31685	0.127979	0.378999	16.8266	4.09549e-05	0.000920207	tubulin, beta 2A class IIA [Source:MGI Symbol;Acc:MGI:107861]	13	34074274	34078007	-1	protein_coding	1	Tubb2a	3116	2788	1129	680	4.58235	4.1	1.66029	4.1	2.76	1.66	1.12	tubulin, beta 2A class IIA	1.5e-32 ( 7.5e-36)	9.9e-01 (9.1e-01)	5.6e-01 (2.8e-01)	9.9e-01 (9.1e-01)
ENSMUSG00000062181	20.4961	5.97528e-06	0.00392142	158.299	4.22534e-35	7.39065e-32	54.993	1.14402e-12	1.45529e-09	17.1814	3.39747e-05	0.0017654	15.7414	7.26173e-05	0.00341058	64.2905	1.07362e-15	6.27651e-13	carboxylesterase 3B [Source:MGI Symbol;Acc:MGI:3644960]	8	105083753	105093929	1	protein_coding	4	Ces3b	7421	2441	13161	12707	0.584009	0.192099	1.03573	0.19	0.56	1.04	3.04	carboxylesterase 3B	7.4e-32 ( 4.2e-35)	3.9e-03 (6.0e-06)	1.5e-09 (1.1e-12)	3.9e-03 (6.0e-06)
ENSMUSG00000003053	4.3653	0.036678	0.522238	154.561	2.73842e-34	4.25764e-31	11.1507	0.00379024	0.0459989	18.1826	2.007e-05	0.0012393	15.1615	9.86969e-05	0.00421277	44.0742	3.16166e-11	6.25341e-09	cytochrome P450, family 2, subfamily c, polypeptide 29 [Source:MGI Symbol;Acc:MGI:103238]	19	39269405	39330713	1	protein_coding	3	Cyp2c29	75616	164236	22144	20042	3.77288	8.19459	1.10488	8.19	3.41	1.1	0.46	cytochrome P450, family 2, subfamily c, polypeptide 29	4.3e-31 ( 2.7e-34)	5.2e-01 (3.7e-02)	4.6e-02 (3.8e-03)	5.2e-01 (3.7e-02)
ENSMUSG00000058135	2.92346	0.0873004	0.660971	151.294	1.4029e-33	1.96308e-30	7.49506	0.0235759	0.142813	10.2056	0.00140017	0.022844	9.09851	0.00255818	0.0365087	45.7331	1.35516e-11	3.035e-09	glutathione S-transferase, mu 1 [Source:MGI Symbol;Acc:MGI:95860]	3	108012255	108017973	-1	protein_coding	4	Gstm1	89090	177876	25053	23478	3.79462	7.57628	1.06708	7.58	3.56	1.07	0.5	glutathione S-transferase, mu 1	2.0e-30 ( 1.4e-33)	6.6e-01 (8.7e-02)	1.4e-01 (2.4e-02)	6.6e-01 (8.7e-02)
ENSMUSG00000030483	0.079223	0.778353	0.97331	145.976	2.00335e-32	2.54844e-29	13.389	0.00123768	0.0215609	8.14952	0.00430725	0.0481879	7.39896	0.00652615	0.066251	30.1416	4.01622e-08	2.95287e-06	cytochrome P450, family 2, subfamily b, polypeptide 10 [Source:MGI Symbol;Acc:MGI:88598]	7	25897620	25926624	1	protein_coding	3	Cyp2b10	6178	22716	129	185	33.3946	122.789	0.697297	122.79	47.89	0.7	0.27	cytochrome P450, family 2, subfamily b, polypeptide 10	2.5e-29 ( 2.0e-32)	9.7e-01 (7.8e-01)	2.2e-02 (1.2e-03)	9.7e-01 (7.8e-01)
ENSMUSG00000039745	1.1016	0.293915	0.854293	143.17	8.1474e-32	9.50055e-29	1.67317	0.433187	0.688603	6.23697	0.012511	0.0944501	5.87886	0.0153238	0.112042	52.7864	3.71875e-13	1.18687e-10	HIV-1 Tat interactive protein 2 [Source:MGI Symbol;Acc:MGI:1859271]	7	49759115	49773975	1	protein_coding	3	Htatip2	1520	1660	664	576	2.63889	2.88194	1.15278	2.88	2.29	1.15	0.92	HIV-1 Tat interactive protein 2	9.5e-29 ( 8.1e-32)	8.5e-01 (2.9e-01)	6.9e-01 (4.3e-01)	8.5e-01 (2.9e-01)
ENSMUSG00000051483	2.40535	0.120921	0.728197	132.796	1.45777e-29	1.56912e-26	2.96202	0.227408	0.499	5.95969	0.0146366	0.103836	5.4416	0.0196626	0.128848	44.408	2.66589e-11	5.50545e-09	carbonyl reductase 1 [Source:MGI Symbol;Acc:MGI:88284]	16	93605853	93610505	1	protein_coding	4	Cbr1	6801	6840	3586	2660	2.55677	2.57143	1.34812	2.57	1.9	1.35	0.99	carbonyl reductase 1	1.6e-26 ( 1.5e-29)	7.3e-01 (1.2e-01)	5.0e-01 (2.3e-01)	7.3e-01 (1.2e-01)
ENSMUSG00000023034	39.7742	2.85092e-10	9.95067e-07	130.36	4.92785e-29	4.92538e-26	78.3209	9.83615e-18	2.75274e-14	130.287	3.54589e-30	2.44134e-26	53.9068	2.10229e-13	3.6903e-10	45.7238	1.36157e-11	3.035e-09	nuclear receptor subfamily 4, group A, member 1 [Source:MGI Symbol;Acc:MGI:1352454]	15	101254269	101274795	1	protein_coding	4	Nr4a1	90	539	73	51	1.76471	10.5686	1.43137	10.57	1.23	1.43	0.17	nuclear receptor subfamily 4, group A, member 1	4.9e-26 ( 4.9e-29)	1.0e-06 (2.9e-10)	2.8e-14 (9.8e-18)	1.0e-06 (2.9e-10)
ENSMUSG00000028240	0.212376	0.644911	0.948095	127.805	1.76804e-28	1.64935e-25	10.0505	0.00656986	0.0646498	10.7948	0.00101784	0.0185147	11.7808	0.000598437	0.0139705	53.9351	2.07225e-13	7.46171e-11	cytochrome P450, family 7, subfamily a, polypeptide 1 [Source:MGI Symbol;Acc:MGI:106091]	4	6265612	6275633	-1	protein_coding	2	Cyp7a1	778	455	3634	3536	0.220023	0.128676	1.02771	0.13	0.21	1.03	1.71	cytochrome P450, family 7, subfamily a, polypeptide 1	1.6e-25 ( 1.8e-28)	9.5e-01 (6.4e-01)	6.5e-02 (6.6e-03)	9.5e-01 (6.4e-01)
ENSMUSG00000032802	0.959625	0.327281	0.868406	120.54	6.68465e-27	5.84614e-24	2.11795	0.346811	0.622969	2.81136	0.0935989	0.31179	2.34698	0.125526	0.375826	14.6649	0.000128414	0.00219649	sulfiredoxin 1 homolog (S. cerevisiae) [Source:MGI Symbol;Acc:MGI:104971]	2	152105516	152111376	1	protein_coding	3	Srxn1	2309	2651	849	610	3.78525	4.3459	1.3918	4.35	2.72	1.39	0.87	sulfiredoxin 1 homolog (S. cerevisiae)	5.8e-24 ( 6.7e-27)	8.7e-01 (3.3e-01)	6.2e-01 (3.5e-01)	8.7e-01 (3.3e-01)
ENSMUSG00000026628	16.8969	3.94659e-05	0.0165299	117.423	3.1761e-26	2.61431e-23	50.7677	9.46102e-12	7.35489e-09	61.3087	4.8791e-15	6.10774e-12	48.8583	2.75139e-12	2.75985e-09	72.8397	1.40618e-17	1.23418e-14	activating transcription factor 3 [Source:MGI Symbol;Acc:MGI:109384]	1	191170296	191218039	-1	protein_coding	3	Atf3	167	1410	32	38	4.39474	37.1053	0.842105	37.11	5.22	0.84	0.12	activating transcription factor 3	2.6e-23 ( 3.2e-26)	1.7e-02 (3.9e-05)	7.4e-09 (9.5e-12)	1.7e-02 (3.9e-05)
ENSMUSG00000029338	0.159644	0.689485	0.95716	112.552	3.62705e-25	2.81963e-22	3.47791	0.175704	0.438809	12.0078	0.000529785	0.0119397	10.3504	0.00129448	0.0233544	29.7075	5.02401e-08	3.52761e-06	anthrax toxin receptor 2 [Source:MGI Symbol;Acc:MGI:1919164]	5	97882783	98031043	-1	protein_coding	3	Antxr2	817	888	432	483	1.69151	1.83851	0.89441	1.84	1.89	0.89	0.92	anthrax toxin receptor 2	2.8e-22 ( 3.6e-25)	9.6e-01 (6.9e-01)	4.4e-01 (1.8e-01)	9.6e-01 (6.9e-01)
ENSMUSG00000050860	2.45424	0.117208	0.720306	110.799	8.71533e-25	6.09768e-22	3.74416	0.153803	0.409547	5.47056	0.0193394	0.1227	4.29959	0.0381215	0.18977	45.2011	1.77808e-11	3.9015e-09	phosphatase, orphan 1 [Source:MGI Symbol;Acc:MGI:2447348]	11	95824499	95832140	1	protein_coding	3	Phospho1	630	638	328	183	3.44262	3.48634	1.79235	3.49	1.92	1.79	0.99	phosphatase, orphan 1	6.1e-22 ( 8.7e-25)	7.2e-01 (1.2e-01)	4.1e-01 (1.5e-01)	7.2e-01 (1.2e-01)
ENSMUSG00000090175	6.45688	0.0110524	0.344032	110.272	1.13419e-24	7.55751e-22	9.59454	0.00825224	0.0752391	4.08083	0.0433723	0.198615	3.58296	0.058375	0.243758	16.5377	4.7692e-05	0.00103514	UDP glucuronosyltransferase 1 family, polypeptide A9 [Source:MGI Symbol;Acc:MGI:3576092]	1	88070800	88218997	1	protein_coding	1	Ugt1a9	6445	7130	1597	532	12.1147	13.4023	3.00188	13.4	4.04	3	0.9	UDP glucuronosyltransferase 1 family, polypeptide A9	7.6e-22 ( 1.1e-24)	3.4e-01 (1.1e-02)	7.5e-02 (8.3e-03)	3.4e-01 (1.1e-02)
ENSMUSG00000039533	0.00129952	0.971243	0.996292	107.896	3.7203e-24	2.36628e-21	0.0580279	0.971403	0.987421	3.57321	0.0587186	0.236074	2.95017	0.0858686	0.304816	14.71	0.000125382	0.00216573	monocyte to macrophage differentiation-associated 2 [Source:MGI Symbol;Acc:MGI:1922354]	5	142562358	142608800	-1	protein_coding	3	Mmd2	209	205	52	30	6.96667	6.83333	1.73333	6.83	4.02	1.73	1.02	monocyte to macrophage differentiation-associated 2	2.4e-21 ( 3.7e-24)	1.0e+00 (9.7e-01)	9.9e-01 (9.7e-01)	1.0e+00 (9.7e-01)
ENSMUSG00000071076	31.9335	1.59545e-08	3.26023e-05	107.379	4.81925e-24	2.93199e-21	93.7657	4.35551e-21	2.45391e-17	44.3414	2.75823e-11	1.65134e-08	42.0395	8.94481e-11	5.70963e-08	36.6543	1.41044e-09	1.57197e-07	jun D proto-oncogene [Source:MGI Symbol;Acc:MGI:96648]	8	70698949	70700616	1	protein_coding	1	Jund	1972	5163	1749	1948	1.01232	2.65041	0.897844	2.65	1.13	0.9	0.38	jun D proto-oncogene	2.9e-21 ( 4.8e-24)	3.3e-05 (1.6e-08)	2.5e-17 (4.4e-21)	3.3e-05 (1.6e-08)
ENSMUSG00000015837	7.57293	0.00592513	0.272534	106.062	9.31159e-24	5.42905e-21	16.1015	0.000318866	0.00834416	27.1185	1.91353e-07	3.09992e-05	24.2552	8.43778e-07	0.000126159	53.1051	3.16166e-13	1.03254e-10	sequestosome 1 [Source:MGI Symbol;Acc:MGI:107931]	11	50199366	50210827	-1	protein_coding	7	Sqstm1	12979	18982	9563	8463	1.53362	2.24294	1.12998	2.24	1.36	1.13	0.68	sequestosome 1	5.4e-21 ( 9.3e-24)	2.7e-01 (5.9e-03)	8.3e-03 (3.2e-04)	2.7e-01 (5.9e-03)
ENSMUSG00000029314	6.24052	0.012486	0.360426	105.965	9.77102e-24	5.46904e-21	34.8068	2.7657e-08	6.34432e-06	43.6882	3.85083e-11	2.20941e-08	40.1298	2.37642e-10	1.33488e-07	84.9709	3.02795e-20	4.25216e-17	glycerol-3-phosphate acyltransferase 3 [Source:MGI Symbol;Acc:MGI:3603816]	5	100845713	100899102	1	protein_coding	5	Gpat3	407	804	143	197	2.06599	4.08122	0.725888	4.08	2.85	0.73	0.51	glycerol-3-phosphate acyltransferase 3	5.5e-21 ( 9.8e-24)	3.6e-01 (1.2e-02)	6.3e-06 (2.8e-08)	3.6e-01 (1.2e-02)
ENSMUSG00000032028	0.215814	0.642248	0.948095	100.711	1.35188e-22	7.27574e-20	8.36587	0.0152537	0.11025	19.5979	9.55755e-06	0.000671466	11.5399	0.000681173	0.0153543	65.6772	5.31156e-16	3.3305e-13	neurexophilin and PC-esterase domain family, member 2 [Source:MGI Symbol;Acc:MGI:1925502]	9	48318006	48353454	-1	protein_coding	5	Nxpe2	304	226	555	589	0.516129	0.383701	0.942275	0.38	0.55	0.94	1.35	neurexophilin and PC-esterase domain family, member 2	7.3e-20 ( 1.4e-22)	9.5e-01 (6.4e-01)	1.1e-01 (1.5e-02)	9.5e-01 (6.4e-01)
ENSMUSG00000000078	17.3597	3.09308e-05	0.0134949	99.759	2.17579e-22	1.12762e-19	27.1161	1.29363e-06	0.000142533	34.8532	3.55526e-09	1.06426e-06	22.88	1.72435e-06	0.000208744	95.5494	1.44247e-22	2.63195e-19	Kruppel-like factor 6 [Source:MGI Symbol;Acc:MGI:1346318]	13	5861482	5870394	1	protein_coding	3	Klf6	333	1202	247	175	1.90286	6.86857	1.41143	6.87	1.35	1.41	0.28	Kruppel-like factor 6	1.1e-19 ( 2.2e-22)	1.3e-02 (3.1e-05)	1.4e-04 (1.3e-06)	1.3e-02 (3.1e-05)
ENSMUSG00000032348	0.58191	0.445564	0.910523	96.6045	1.05343e-21	5.26451e-19	1.18045	0.554202	0.770645	3.48627	0.06188	0.243315	3.29865	0.0693368	0.269051	17.5465	2.80365e-05	0.000675328	glutathione S-transferase, alpha 4 [Source:MGI Symbol;Acc:MGI:1309515]	9	78182774	78209349	1	protein_coding	2	Gsta4	3734	3473	1854	1373	2.71959	2.5295	1.35033	2.53	2.01	1.35	1.08	glutathione S-transferase, alpha 4	5.3e-19 ( 1.1e-21)	9.1e-01 (4.5e-01)	7.7e-01 (5.5e-01)	9.1e-01 (4.5e-01)
ENSMUSG00000023043	2.46227	0.11661	0.71933	95.428	1.89704e-21	9.15356e-19	4.73186	0.0938621	0.315269	6.12411	0.013335	0.0981418	5.64991	0.0174563	0.121167	30.4078	3.50113e-08	2.64153e-06	keratin 18 [Source:MGI Symbol;Acc:MGI:96692]	15	102028180	102032027	1	protein_coding	1	Krt18	5846	6132	3026	3288	1.77798	1.86496	0.920316	1.86	1.93	0.92	0.95	keratin 18	9.2e-19 ( 1.9e-21)	7.2e-01 (1.2e-01)	3.2e-01 (9.4e-02)	7.2e-01 (1.2e-01)
ENSMUSG00000057933	2.43885	0.118363	0.723729	94.5352	2.96439e-21	1.38269e-18	3.64659	0.161493	0.418863	7.07667	0.0078094	0.0711014	6.40615	0.0113726	0.0934496	27.8262	1.32717e-07	8.03338e-06	glutathione S-transferase, alpha 2 (Yc2) [Source:MGI Symbol;Acc:MGI:95863]	9	78331018	78355788	-1	protein_coding	4	Gsta2	2787	4907	668	536	5.19963	9.15485	1.24627	9.15	4.17	1.25	0.57	glutathione S-transferase, alpha 2 (Yc2)	1.4e-18 ( 3.0e-21)	7.2e-01 (1.2e-01)	4.2e-01 (1.6e-01)	7.2e-01 (1.2e-01)
ENSMUSG00000028003	2.68099	0.101552	0.691838	92.8663	6.82888e-21	2.98614e-18	3.4665	0.176709	0.440001	23.6331	1.16566e-06	0.000138282	22.7881	1.80879e-06	0.000213735	49.9706	1.56066e-12	4.56589e-10	lecithin-retinol acyltransferase (phosphatidylcholine-retinol-O-acyltransferase) [Source:MGI Symbol;Acc:MGI:1891259]	3	82892579	82903973	-1	protein_coding	1	Lrat	766	848	379	320	2.39375	2.65	1.18437	2.65	2.02	1.18	0.9	lecithin-retinol acyltransferase (phosphatidylcholine-retinol-O-acyltransferase)	3.0e-18 ( 6.8e-21)	6.9e-01 (1.0e-01)	4.4e-01 (1.8e-01)	6.9e-01 (1.0e-01)
ENSMUSG00000026688	0.295936	0.586441	0.94193	88.4634	6.17201e-20	2.61712e-17	1.35192	0.508669	0.740204	4.2385	0.039517	0.188168	3.55207	0.0594712	0.246431	19.8724	8.27861e-06	0.000254948	microsomal glutathione S-transferase 3 [Source:MGI Symbol;Acc:MGI:1913697]	1	167371966	167393841	-1	protein_coding	1	Mgst3	1645	1392	877	508	3.23819	2.74016	1.72638	2.74	1.88	1.73	1.18	microsomal glutathione S-transferase 3	2.6e-17 ( 6.2e-20)	9.4e-01 (5.9e-01)	7.4e-01 (5.1e-01)	9.4e-01 (5.9e-01)
ENSMUSG00000079507	8.22967	0.0041211	0.23306	87.7076	9.00623e-20	3.70659e-17	8.29097	0.0158358	0.113403	9.24705	0.00235875	0.0323175	7.38664	0.00657101	0.0664817	15.6894	7.46415e-05	0.00144323	histocompatibility 2, Q region locus 1 [Source:MGI Symbol;Acc:MGI:95928]	17	35320405	35325099	1	protein_coding	3	H2-Q1	22	10	52	205	0.107317	0.0487805	0.253659	0.05	0.42	0.25	2.2	histocompatibility 2, Q region locus 1	3.7e-17 ( 9.0e-20)	2.3e-01 (4.1e-03)	1.1e-01 (1.6e-02)	2.3e-01 (4.1e-03)
ENSMUSG00000061353	3.2804	0.0701118	0.623995	86.1177	1.99425e-19	7.97301e-17	8.05103	0.0178542	0.121069	14.5021	0.000140006	0.00480769	12.9905	0.000313074	0.00912136	53.15	3.0902e-13	1.03254e-10	chemokine (C-X-C motif) ligand 12 [Source:MGI Symbol;Acc:MGI:103556]	6	117168535	117181367	1	protein_coding	4	Cxcl12	5360	3786	7473	8123	0.659855	0.466084	0.91998	0.47	0.72	0.92	1.42	chemokine (C-X-C motif) ligand 12	8.0e-17 ( 2.0e-19)	6.2e-01 (7.0e-02)	1.2e-01 (1.8e-02)	6.2e-01 (7.0e-02)
ENSMUSG00000020182	0.765614	0.381577	0.889278	85.9876	2.12824e-19	8.27235e-17	1.91642	0.383578	0.651622	1.48172	0.223506	0.503641	1.35055	0.245182	0.538177	10.8201	0.00100401	0.010475	dopa decarboxylase [Source:MGI Symbol;Acc:MGI:94876]	11	11814101	11898144	-1	protein_coding	10	Ddc	1500	1317	531	501	2.99401	2.62874	1.05988	2.63	2.82	1.06	1.14	dopa decarboxylase	8.3e-17 ( 2.1e-19)	8.9e-01 (3.8e-01)	6.5e-01 (3.8e-01)	8.9e-01 (3.8e-01)
ENSMUSG00000004038	2.99685	0.0834265	0.650916	85.675	2.48829e-19	9.16281e-17	5.52966	0.0629869	0.251271	9.48796	0.00206825	0.0297349	8.13757	0.00433573	0.0502573	40.7496	1.73039e-10	2.69998e-08	glutathione S-transferase, mu 3 [Source:MGI Symbol;Acc:MGI:106026]	3	107963696	107969283	-1	protein_coding	1	Gstm3	5651	18041	945	600	9.41833	30.0683	1.575	30.07	5.98	1.58	0.31	glutathione S-transferase, mu 3	9.2e-17 ( 2.5e-19)	6.5e-01 (8.3e-02)	2.5e-01 (6.3e-02)	6.5e-01 (8.3e-02)
ENSMUSG00000024987	2.66644	0.102485	0.69388	85.5399	2.66219e-19	9.55179e-17	4.30886	0.115969	0.352949	8.82109	0.0029777	0.0373432	7.66066	0.00564379	0.0601096	24.8281	6.26763e-07	3.03505e-05	cytochrome P450, family 26, subfamily a, polypeptide 1 [Source:MGI Symbol;Acc:MGI:1096359]	19	37697808	37701528	1	protein_coding	1	Cyp26a1	1887	3717	513	280	6.73929	13.275	1.83214	13.28	3.68	1.83	0.51	cytochrome P450, family 26, subfamily a, polypeptide 1	9.6e-17 ( 2.7e-19)	6.9e-01 (1.0e-01)	3.5e-01 (1.2e-01)	6.9e-01 (1.0e-01)
ENSMUSG00000026956	6.8398	0.0089149	0.317789	83.2935	8.18557e-19	2.86352e-16	12.3382	0.00209313	0.0305096	11.5157	0.000690125	0.0143767	10.02	0.00154851	0.0260866	44.1801	2.9951e-11	6.0086e-09	UDP-N-acteylglucosamine pyrophosphorylase 1-like 1 [Source:MGI Symbol;Acc:MGI:2443318]	2	25359889	25365682	-1	protein_coding	6	Uap1l1	211	393	103	79	2.67089	4.97468	1.3038	4.97	2.05	1.3	0.54	UDP-N-acteylglucosamine pyrophosphorylase 1-like 1	2.9e-16 ( 8.2e-19)	3.2e-01 (8.9e-03)	3.1e-02 (2.1e-03)	3.2e-01 (8.9e-03)
ENSMUSG00000026259	0.0219801	0.88214	0.985163	81.6147	1.89496e-18	6.31337e-16	2.14011	0.342989	0.620282	11.5302	0.000684757	0.0143299	10.714	0.00106329	0.020539	42.6399	6.5805e-11	1.18474e-08	neuronal guanine nucleotide exchange factor [Source:MGI Symbol;Acc:MGI:1858414]	1	87476834	87573870	-1	protein_coding	4	Ngef	493	586	921	1164	0.42354	0.503436	0.791237	0.5	0.54	0.79	0.84	neuronal guanine nucleotide exchange factor	6.3e-16 ( 1.9e-18)	9.9e-01 (8.8e-01)	6.2e-01 (3.4e-01)	9.9e-01 (8.8e-01)
ENSMUSG00000025375	8.62795	0.00331044	0.20511	81.2108	2.31895e-18	7.5463e-16	11.391	0.00336099	0.0423747	32.3486	1.28848e-08	3.06313e-06	15.2848	9.24553e-05	0.00403214	95.4728	1.49936e-22	2.63195e-19	apoptosis-associated tyrosine kinase [Source:MGI Symbol;Acc:MGI:1197518]	11	120007313	120047167	-1	protein_coding	9	Aatk	205	98	372	533	0.384615	0.183865	0.697936	0.18	0.55	0.7	2.09	apoptosis-associated tyrosine kinase	7.5e-16 ( 2.3e-18)	2.1e-01 (3.3e-03)	4.2e-02 (3.4e-03)	2.1e-01 (3.3e-03)
ENSMUSG00000028211	11.3362	0.000760109	0.0982605	80.9513	2.64025e-18	8.20999e-16	19.1596	6.91113e-05	0.00300334	22.6329	1.96094e-06	0.000198545	17.2114	3.34431e-05	0.00188611	38.7081	4.92162e-10	6.38255e-08	transformation related protein 53 inducible nuclear protein 1 [Source:MGI Symbol;Acc:MGI:1926609]	4	11156431	11174379	1	protein_coding	4	Trp53inp1	2283	6184	1438	1236	1.84709	5.00324	1.16343	5	1.59	1.16	0.37	transformation related protein 53 inducible nuclear protein 1	8.2e-16 ( 2.6e-18)	9.8e-02 (7.6e-04)	3.0e-03 (6.9e-05)	9.8e-02 (7.6e-04)
ENSMUSG00000001627	14.9672	0.000109398	0.0309595	80.5955	3.15437e-18	9.59544e-16	22.0343	1.64181e-05	0.00101206	31.5596	1.93414e-08	4.29565e-06	25.4183	4.61528e-07	7.86983e-05	33.9515	5.65042e-09	5.38016e-07	interferon-related developmental regulator 1 [Source:MGI Symbol;Acc:MGI:1316717]	12	40201567	40248504	-1	protein_coding	10	Ifrd1	1060	1881	577	483	2.19462	3.89441	1.19462	3.89	1.84	1.19	0.56	interferon-related developmental regulator 1	9.6e-16 ( 3.2e-18)	3.1e-02 (1.1e-04)	1.0e-03 (1.6e-05)	3.1e-02 (1.1e-04)
ENSMUSG00000034371	18.4111	1.78021e-05	0.00932028	80.0954	4.05046e-18	1.20592e-15	21.1148	2.60005e-05	0.00143804	1.72484	0.189072	0.46079	1.83359	0.175704	0.453485	10.0945	0.00148713	0.0142066	triokinase, FMN cyclase [Source:MGI Symbol;Acc:MGI:2385084]	19	10592200	10604258	-1	protein_coding	1	Tkfc	9656	8255	5099	6904	1.39861	1.19568	0.738557	1.2	1.89	0.74	1.17	triokinase, FMN cyclase	1.2e-15 ( 4.1e-18)	9.3e-03 (1.8e-05)	1.4e-03 (2.6e-05)	9.3e-03 (1.8e-05)
ENSMUSG00000062825	0.0409991	0.83954	0.980687	79.7551	4.80167e-18	1.39979e-15	13.5006	0.00117051	0.0208319	8.38597	0.00378129	0.0443891	7.63157	0.00573553	0.0608081	37.9817	7.14104e-10	8.72015e-08	actin, gamma, cytoplasmic 1 [Source:MGI Symbol;Acc:MGI:87906]	11	120345690	120348542	-1	protein_coding	9	Actg1	4569	6833	2192	2879	1.58701	2.37339	0.761375	2.37	2.08	0.76	0.67	actin, gamma, cytoplasmic 1	1.4e-15 ( 4.8e-18)	9.8e-01 (8.4e-01)	2.1e-02 (1.2e-03)	9.8e-01 (8.4e-01)
ENSMUSG00000041920	0.284039	0.594066	0.943647	79.4731	5.52898e-18	1.57892e-15	12.7591	0.00169589	0.0267538	12.3962	0.000430198	0.0104581	10.8346	0.000996219	0.0196212	54.8168	1.32307e-13	5.02158e-11	solute carrier family 16 (monocarboxylic acid transporters), member 6 [Source:MGI Symbol;Acc:MGI:2144585]	11	109450855	109473598	-1	protein_coding	5	Slc16a6	219	332	59	73	3	4.54795	0.808219	4.55	3.71	0.81	0.66	solute carrier family 16 (monocarboxylic acid transporters), member 6	1.6e-15 ( 5.5e-18)	9.4e-01 (5.9e-01)	2.7e-02 (1.7e-03)	9.4e-01 (5.9e-01)
ENSMUSG00000032902	0.366274	0.545042	0.934401	77.8358	1.25365e-17	3.50848e-15	0.468571	0.791136	0.903542	10.8672	0.000978834	0.0180194	10.7187	0.00106059	0.0205149	31.1393	2.40162e-08	1.89472e-06	solute carrier family 16 (monocarboxylic acid transporters), member 1 [Source:MGI Symbol;Acc:MGI:106013]	3	104638668	104658462	1	protein_coding	1	Slc16a1	1256	1113	698	665	1.88872	1.67368	1.04962	1.67	1.8	1.05	1.13	solute carrier family 16 (monocarboxylic acid transporters), member 1	3.5e-15 ( 1.3e-17)	9.3e-01 (5.5e-01)	9.0e-01 (7.9e-01)	9.3e-01 (5.5e-01)
ENSMUSG00000032420	0.254084	0.614214	0.945879	77.7696	1.29582e-17	3.55538e-15	1.35657	0.507488	0.739456	5.49841	0.0190338	0.121678	5.41	0.0200217	0.130289	38.7657	4.77845e-10	6.27138e-08	5' nucleotidase, ecto [Source:MGI Symbol;Acc:MGI:99782]	9	88327197	88372092	1	protein_coding	4	Nt5e	446	509	236	181	2.46409	2.81215	1.30387	2.81	1.89	1.3	0.88	5' nucleotidase, ecto	3.6e-15 ( 1.3e-17)	9.5e-01 (6.1e-01)	7.4e-01 (5.1e-01)	9.5e-01 (6.1e-01)
ENSMUSG00000024130	2.36856	0.123801	0.732015	77.1588	1.75868e-17	4.73254e-15	9.48923	0.0086984	0.0776091	19.1689	1.19644e-05	0.000811577	15.3081	9.13252e-05	0.00400775	39.2537	3.72156e-10	5.02518e-08	ATP-binding cassette, sub-family A (ABC1), member 3 [Source:MGI Symbol;Acc:MGI:1351617]	17	24351950	24410201	1	protein_coding	8	Abca3	1569	2018	1046	1124	1.39591	1.79537	0.930605	1.8	1.5	0.93	0.78	ATP-binding cassette, sub-family A (ABC1), member 3	4.7e-15 ( 1.8e-17)	7.3e-01 (1.2e-01)	7.8e-02 (8.7e-03)	7.3e-01 (1.2e-01)
ENSMUSG00000020926	0.249514	0.617417	0.946136	75.7828	3.49924e-17	9.23866e-15	18.2741	0.000107602	0.00395191	11.6464	0.000643268	0.0137757	10.6223	0.00111731	0.0213474	26.2399	3.01524e-07	1.63486e-05	a disintegrin and metallopeptidase domain 11 [Source:MGI Symbol;Acc:MGI:1098667]	11	102761439	102780262	1	protein_coding	9	Adam11	471	1385	73	161	2.92547	8.60248	0.453416	8.6	6.45	0.45	0.34	a disintegrin and metallopeptidase domain 11	9.2e-15 ( 3.5e-17)	9.5e-01 (6.2e-01)	4.0e-03 (1.1e-04)	9.5e-01 (6.2e-01)
ENSMUSG00000019960	0.0234511	0.87829	0.98478	75.5332	3.96445e-17	1.02731e-14	0.0729091	0.964202	0.983818	6.53722	0.010564	0.0850184	5.76173	0.016379	0.116459	39.9558	2.5977e-10	3.76078e-08	dual specificity phosphatase 6 [Source:MGI Symbol;Acc:MGI:1914853]	10	99263231	99267489	1	protein_coding	4	Dusp6	1312	1303	731	580	2.26207	2.24655	1.26034	2.25	1.79	1.26	1.01	dual specificity phosphatase 6	1.0e-14 ( 4.0e-17)	9.8e-01 (8.8e-01)	9.8e-01 (9.6e-01)	9.8e-01 (8.8e-01)
ENSMUSG00000029178	21.1882	4.16315e-06	0.00311374	75.4936	4.04368e-17	1.02879e-14	26.0607	2.19275e-06	0.000209223	39.0942	4.03845e-10	1.63557e-07	30.3639	3.58134e-08	9.38057e-06	44.4862	2.5616e-11	5.4504e-09	Kruppel-like factor 3 (basic) [Source:MGI Symbol;Acc:MGI:1342773]	5	64803388	64832901	1	protein_coding	9	Klf3	1625	2771	1587	1121	1.4496	2.4719	1.4157	2.47	1.02	1.42	0.59	Kruppel-like factor 3 (basic)	1.0e-14 ( 4.0e-17)	3.1e-03 (4.2e-06)	2.1e-04 (2.2e-06)	3.1e-03 (4.2e-06)
ENSMUSG00000026249	0.0908146	0.763144	0.9704	75.1314	4.84647e-17	1.21101e-14	0.503084	0.777601	0.897067	8.25976	0.00405335	0.0463233	6.7278	0.00949218	0.08416	19.4662	1.02397e-05	0.000298953	serine (or cysteine) peptidase inhibitor, clade E, member 2 [Source:MGI Symbol;Acc:MGI:101780]	1	79794197	79861180	-1	protein_coding	6	Serpine2	95	97	281	366	0.259563	0.265027	0.76776	0.27	0.34	0.77	0.98	serine (or cysteine) peptidase inhibitor, clade E, member 2	1.2e-14 ( 4.8e-17)	9.7e-01 (7.6e-01)	9.0e-01 (7.8e-01)	9.7e-01 (7.6e-01)
ENSMUSG00000038776	3.16968	0.0750172	0.633983	75.0887	4.95109e-17	1.21545e-14	3.3945	0.183187	0.448817	7.61734	0.00578097	0.0579984	7.13189	0.00757247	0.0726501	31.8094	1.70071e-08	1.42161e-06	epoxide hydrolase 1, microsomal [Source:MGI Symbol;Acc:MGI:95405]	1	180976210	181020904	-1	protein_coding	4	Ephx1	22491	26961	11709	9233	2.43594	2.92007	1.26817	2.92	1.92	1.27	0.83	epoxide hydrolase 1, microsomal	1.2e-14 ( 5.0e-17)	6.3e-01 (7.5e-02)	4.5e-01 (1.8e-01)	6.3e-01 (7.5e-02)
ENSMUSG00000030203	12.604	0.000384929	0.068315	74.6503	6.16438e-17	1.48721e-14	25.8391	2.44968e-06	0.000224041	64.5401	9.45853e-16	1.30244e-12	51.4447	7.36438e-13	9.40163e-10	48.4819	3.33355e-12	9.17903e-10	dual specificity phosphatase 16 [Source:MGI Symbol;Acc:MGI:1917936]	6	134715468	134792625	-1	protein_coding	7	Dusp16	922	1290	750	705	1.3078	1.82979	1.06383	1.83	1.23	1.06	0.71	dual specificity phosphatase 16	1.5e-14 ( 6.2e-17)	6.8e-02 (3.8e-04)	2.2e-04 (2.4e-06)	6.8e-02 (3.8e-04)
ENSMUSG00000063730	5.63149	0.0176406	0.401077	73.8108	9.37978e-17	2.2246e-14	14.1289	0.000854944	0.0169932	25.3399	4.8066e-07	6.89447e-05	14.0702	0.000176111	0.00627695	118.922	1.08923e-27	5.09867e-24	hydroxy-delta-5-steroid dehydrogenase, 3 beta- and steroid delta-isomerase 2 [Source:MGI Symbol;Acc:MGI:96234]	3	98709255	98724543	-1	protein_coding	3	Hsd3b2	985	534	1476	1471	0.669613	0.363018	1.0034	0.36	0.67	1	1.84	hydroxy-delta-5-steroid dehydrogenase, 3 beta- and steroid delta-isomerase 2	2.2e-14 ( 9.4e-17)	4.0e-01 (1.8e-02)	1.7e-02 (8.5e-04)	4.0e-01 (1.8e-02)
ENSMUSG00000042622	24.3656	7.96771e-07	0.000834299	71.6919	2.70587e-16	6.31055e-14	39.125	3.19242e-09	1.17557e-06	27.8134	1.33596e-07	2.45283e-05	24.234	8.53109e-07	0.000126159	31.8171	1.69395e-08	1.42161e-06	v-maf musculoaponeurotic fibrosarcoma oncogene family, protein F (avian) [Source:MGI Symbol;Acc:MGI:96910]	15	79346621	79359076	1	protein_coding	4	Maff	443	1125	409	228	1.94298	4.93421	1.79386	4.93	1.08	1.79	0.39	v-maf musculoaponeurotic fibrosarcoma oncogene family, protein F (avian)	6.3e-14 ( 2.7e-16)	8.3e-04 (8.0e-07)	1.2e-06 (3.2e-09)	8.3e-04 (8.0e-07)
ENSMUSG00000074476	0.29914	0.584422	0.940909	70.7787	4.27167e-16	9.79893e-14	10.9455	0.00419976	0.0488912	22.0055	2.71875e-06	0.000251257	22.0738	2.62369e-06	0.000277026	61.7183	3.96272e-15	2.06105e-12	SPC24, NDC80 kinetochore complex component, homolog (S. cerevisiae) [Source:MGI Symbol;Acc:MGI:1914879]	9	21755442	21760303	-1	protein_coding	5	Spc24	278	181	518	527	0.527514	0.343454	0.982922	0.34	0.54	0.98	1.54	SPC24, NDC80 kinetochore complex component, homolog (S. cerevisiae)	9.8e-14 ( 4.3e-16)	9.4e-01 (5.8e-01)	4.9e-02 (4.2e-03)	9.4e-01 (5.8e-01)
ENSMUSG00000021594	7.73265	0.00542311	0.260832	70.0583	6.12392e-16	1.38213e-13	20.8501	2.96797e-05	0.00157912	15.844	6.87858e-05	0.0029234	14.705	0.000125715	0.00487682	41.7101	1.05859e-10	1.85822e-08	steroid 5 alpha-reductase 1 [Source:MGI Symbol;Acc:MGI:98400]	13	69573449	69611442	-1	protein_coding	3	Srd5a1	1923	862	2288	2923	0.657886	0.294902	0.782757	0.29	0.84	0.78	2.23	steroid 5 alpha-reductase 1	1.4e-13 ( 6.1e-16)	2.6e-01 (5.4e-03)	1.6e-03 (3.0e-05)	2.6e-01 (5.4e-03)
ENSMUSG00000031645	2.36533	0.124058	0.73247	69.79	7.00327e-16	1.5312e-13	8.37909	0.0151532	0.109773	22.0175	2.70181e-06	0.000251257	23.8728	1.02917e-06	0.000140317	57.5675	3.26573e-14	1.34884e-11	coagulation factor XI [Source:MGI Symbol;Acc:MGI:99481]	8	45241174	45262031	-1	protein_coding	2	F11	1134	799	1817	2073	0.547033	0.385432	0.876507	0.39	0.62	0.88	1.42	coagulation factor XI	1.5e-13 ( 7.0e-16)	7.3e-01 (1.2e-01)	1.1e-01 (1.5e-02)	7.3e-01 (1.2e-01)
ENSMUSG00000030055	0.0162304	0.898625	0.988035	69.8103	6.93244e-16	1.5312e-13	1.34285	0.510979	0.74264	8.85159	0.00292833	0.0369259	8.27365	0.00402246	0.0477897	30.5395	3.27132e-08	2.49669e-06	RAB43, member RAS oncogene family [Source:MGI Symbol;Acc:MGI:1917084]	6	87788853	87812164	-1	protein_coding	7	Rab43	2859	2623	4482	4859	0.588393	0.539823	0.922412	0.54	0.64	0.92	1.09	RAB43, member RAS oncogene family	1.5e-13 ( 6.9e-16)	9.9e-01 (9.0e-01)	7.4e-01 (5.1e-01)	9.9e-01 (9.0e-01)
ENSMUSG00000025408	11.4813	0.000703003	0.0975429	69.4796	8.1791e-16	1.76077e-13	13.4349	0.00120963	0.0213298	33.7831	6.16109e-09	1.77e-06	27.6118	1.48269e-07	3.20329e-05	58.0732	2.52546e-14	1.0747e-11	DNA-damage inducible transcript 3 [Source:MGI Symbol;Acc:MGI:109247]	10	127290774	127296288	1	protein_coding	3	Ddit3	701	1343	261	145	4.83448	9.26207	1.8	9.26	2.69	1.8	0.52	DNA-damage inducible transcript 3	1.8e-13 ( 8.2e-16)	9.8e-02 (7.0e-04)	2.1e-02 (1.2e-03)	9.8e-02 (7.0e-04)
ENSMUSG00000057229	2.01124	0.156137	0.769852	68.1487	1.59111e-15	3.32305e-13	6.58725	0.037119	0.186029	3.46239	0.0627796	0.24511	3.13673	0.076547	0.284604	13.6283	0.0002228	0.0033179	distal membrane arm assembly complex 2 [Source:MGI Symbol;Acc:MGI:1913599]	7	25619414	25625551	1	protein_coding	6	Dmac2	750	1048	1387	1529	0.490517	0.685415	0.907129	0.69	0.54	0.91	0.72	distal membrane arm assembly complex 2	3.3e-13 ( 1.6e-15)	7.7e-01 (1.6e-01)	1.9e-01 (3.7e-02)	7.7e-01 (1.6e-01)
ENSMUSG00000035811	2.00105	0.15719	0.769852	67.9953	1.71797e-15	3.43423e-13	18.177	0.000112959	0.00410553	0.82018	0.365127	0.651735	0.535032	0.464499	0.734933	5.5879	0.018085	0.086369	UDP glucuronosyltransferase 2 family, polypeptide B35 [Source:MGI Symbol;Acc:MGI:3576100]	5	87000860	87013275	1	protein_coding	1	Ugt2b35	9071	6803	5186	2320	3.90991	2.93233	2.23534	2.93	1.75	2.24	1.33	UDP glucuronosyltransferase 2 family, polypeptide B35	3.4e-13 ( 1.7e-15)	7.7e-01 (1.6e-01)	4.1e-03 (1.1e-04)	7.7e-01 (1.6e-01)
ENSMUSG00000007594	4.91787	0.0265803	0.466457	68.0378	1.68181e-15	3.43423e-13	5.23533	0.0729732	0.274567	1.86466	0.172088	0.438256	1.69764	0.192597	0.472344	15.0182	0.000106478	0.00193478	hyaluronan and proteoglycan link protein 4 [Source:MGI Symbol;Acc:MGI:2679531]	8	70083457	70090862	1	protein_coding	3	Hapln4	306	330	93	138	2.21739	2.3913	0.673913	2.39	3.29	0.67	0.93	hyaluronan and proteoglycan link protein 4	3.4e-13 ( 1.7e-15)	4.7e-01 (2.7e-02)	2.7e-01 (7.3e-02)	4.7e-01 (2.7e-02)
ENSMUSG00000037035	4.59846	0.0320006	0.497149	67.3963	2.31782e-15	4.50462e-13	4.90407	0.0861181	0.301338	6.00247	0.0142859	0.102099	5.18394	0.0227965	0.140594	42.1746	8.34767e-11	1.48388e-08	inhibin beta-B [Source:MGI Symbol;Acc:MGI:96571]	1	119415465	119422248	-1	protein_coding	1	Inhbb	252	312	146	52	4.84615	6	2.80769	6	1.73	2.81	0.81	inhibin beta-B	4.5e-13 ( 2.3e-15)	5.0e-01 (3.2e-02)	3.0e-01 (8.6e-02)	5.0e-01 (3.2e-02)
ENSMUSG00000017639	0.0168153	0.896824	0.988032	66.8814	2.99842e-15	5.74752e-13	8.23631	0.0162745	0.115508	20.5873	5.69727e-06	0.000466973	21.575	3.40257e-06	0.000331821	67.53	2.07504e-16	1.45699e-13	RAB11 family interacting protein 4 (class II) [Source:MGI Symbol;Acc:MGI:2442920]	11	79591212	79698023	1	protein_coding	2	Rab11fip4	221	377	118	122	1.81148	3.09016	0.967213	3.09	1.87	0.97	0.59	RAB11 family interacting protein 4 (class II)	5.7e-13 ( 3.0e-15)	9.9e-01 (9.0e-01)	1.2e-01 (1.6e-02)	9.9e-01 (9.0e-01)
ENSMUSG00000063415	0.231478	0.63043	0.94754	66.7207	3.24922e-15	6.14411e-13	11.511	0.00316539	0.0407107	8.81056	0.00299492	0.0374569	8.9287	0.00280724	0.0384231	19.2634	1.13866e-05	0.000323689	cytochrome P450, family 26, subfamily b, polypeptide 1 [Source:MGI Symbol;Acc:MGI:2176159]	6	84571414	84593908	-1	protein_coding	5	Cyp26b1	1179	2333	275	435	2.71034	5.36322	0.632184	5.36	4.29	0.63	0.51	cytochrome P450, family 26, subfamily b, polypeptide 1	6.1e-13 ( 3.2e-15)	9.5e-01 (6.3e-01)	4.1e-02 (3.2e-03)	9.5e-01 (6.3e-01)
ENSMUSG00000025574	0.00946365	0.922503	0.989928	66.4452	3.72912e-15	6.95754e-13	4.32725	0.114908	0.351905	8.8709	0.00289753	0.0367291	8.45008	0.00365027	0.0453233	53.5659	2.50068e-13	8.56513e-11	thymidine kinase 1 [Source:MGI Symbol;Acc:MGI:98763]	11	117815526	117826092	-1	protein_coding	7	Tk1	595	451	1046	1186	0.501686	0.38027	0.881956	0.38	0.57	0.88	1.32	thymidine kinase 1	7.0e-13 ( 3.7e-15)	9.9e-01 (9.2e-01)	3.5e-01 (1.1e-01)	9.9e-01 (9.2e-01)
ENSMUSG00000024843	0.434389	0.509843	0.925885	66.218	4.17783e-15	7.69215e-13	1.11728	0.571986	0.780916	5.46365	0.019416	0.122867	4.85471	0.0275708	0.157028	18.4983	1.70056e-05	0.000450584	choline kinase alpha [Source:MGI Symbol;Acc:MGI:107760]	19	3851773	3894369	1	protein_coding	14	Chka	1199	1241	705	365	3.28493	3.4	1.93151	3.4	1.7	1.93	0.97	choline kinase alpha	7.7e-13 ( 4.2e-15)	9.3e-01 (5.1e-01)	7.8e-01 (5.7e-01)	9.3e-01 (5.1e-01)
ENSMUSG00000028838	0.209883	0.646859	0.948095	66.1837	4.25006e-15	7.72352e-13	9.59079	0.00826775	0.0752724	14.7537	0.000122504	0.00433644	14.8616	0.000115692	0.00464376	66.1852	4.10491e-16	2.74501e-13	exostoses (multiple)-like 1 [Source:MGI Symbol;Acc:MGI:1888742]	4	134356372	134383850	-1	protein_coding	3	Extl1	305	490	114	135	2.25926	3.62963	0.844444	3.63	2.68	0.84	0.62	exostoses (multiple)-like 1	7.7e-13 ( 4.3e-15)	9.5e-01 (6.5e-01)	7.5e-02 (8.3e-03)	9.5e-01 (6.5e-01)
ENSMUSG00000027075	0.00125946	0.97169	0.996292	66.0587	4.52415e-15	8.11621e-13	8.15413	0.0169572	0.117992	5.91492	0.0150132	0.105475	4.88942	0.0270218	0.155329	22.4328	2.17625e-06	8.30465e-05	solute carrier family 43, member 1 [Source:MGI Symbol;Acc:MGI:1931352]	2	84838850	84863594	1	protein_coding	6	Slc43a1	101	163	205	437	0.231121	0.372998	0.469108	0.37	0.49	0.47	0.62	solute carrier family 43, member 1	8.1e-13 ( 4.5e-15)	1.0e+00 (9.7e-01)	1.2e-01 (1.7e-02)	1.0e+00 (9.7e-01)
ENSMUSG00000027762	5.77641	0.0162427	0.394611	66.0184	4.61613e-15	8.1764e-13	30.1639	2.81835e-07	4.06569e-05	13.0447	0.000304143	0.00808505	13.0499	0.000303294	0.00897207	55.9721	7.3505e-14	2.86731e-11	succinate receptor 1 [Source:MGI Symbol;Acc:MGI:1934135]	3	60081869	60087566	1	protein_coding	2	Sucnr1	446	125	647	505	0.883168	0.247525	1.28119	0.25	0.69	1.28	3.57	succinate receptor 1	8.2e-13 ( 4.6e-15)	3.9e-01 (1.6e-02)	4.1e-05 (2.8e-07)	3.9e-01 (1.6e-02)
ENSMUSG00000030562	0.647168	0.421127	0.905798	64.9685	7.80334e-15	1.36001e-12	5.32772	0.0696788	0.266835	19.2514	1.14586e-05	0.000784997	18.4951	1.70345e-05	0.00112308	86.5577	1.35721e-20	2.1177e-17	NADPH oxidase 4 [Source:MGI Symbol;Acc:MGI:1354184]	7	87246096	87398710	1	protein_coding	8	Nox4	616	440	930	1020	0.603922	0.431373	0.911765	0.43	0.66	0.91	1.4	NADPH oxidase 4	1.4e-12 ( 7.8e-15)	9.1e-01 (4.2e-01)	2.7e-01 (7.0e-02)	9.1e-01 (4.2e-01)
ENSMUSG00000048486	0.384449	0.535232	0.932935	64.9508	7.87258e-15	1.36001e-12	0.448167	0.799248	0.907249	10.2942	0.00133447	0.0221393	9.07281	0.00259438	0.0367381	43.4587	4.33011e-11	8.21726e-09	fat storage-inducing transmembrane protein 2 [Source:MGI Symbol;Acc:MGI:2444508]	2	163466379	163472629	-1	protein_coding	1	Fitm2	1029	969	1760	2202	0.467302	0.440054	0.799273	0.44	0.58	0.8	1.06	fat storage-inducing transmembrane protein 2	1.4e-12 ( 7.9e-15)	9.3e-01 (5.4e-01)	9.1e-01 (8.0e-01)	9.3e-01 (5.4e-01)
ENSMUSG00000064284	0.192924	0.660494	0.949826	63.7008	1.47079e-14	2.50985e-12	6.98246	0.0304634	0.165905	1.6806	0.194845	0.467824	1.5689	0.210367	0.494581	16.7046	4.36759e-05	0.000958473	cysteine rich, DPF motif domain containing 1 [Source:MGI Symbol;Acc:MGI:1919605]	15	85806972	85811697	-1	protein_coding	6	Cdpf1	279	187	138	84	3.32143	2.22619	1.64286	2.23	2.02	1.64	1.49	cysteine rich, DPF motif domain containing 1	2.5e-12 ( 1.5e-14)	9.5e-01 (6.6e-01)	1.7e-01 (3.0e-02)	9.5e-01 (6.6e-01)
ENSMUSG00000070407	0.183101	0.668722	0.952436	62.5026	2.67756e-14	4.46037e-12	1.25223	0.534665	0.757074	9.51258	0.00204068	0.029486	8.24673	0.00408255	0.0482934	20.3927	6.30714e-06	0.000205502	heparan sulfate (glucosamine) 3-O-sulfotransferase 3B1 [Source:MGI Symbol;Acc:MGI:1333853]	11	63885792	63922290	-1	protein_coding	1	Hs3st3b1	1149	1272	1658	2140	0.536916	0.594393	0.774766	0.59	0.69	0.77	0.9	heparan sulfate (glucosamine) 3-O-sulfotransferase 3B1	4.5e-12 ( 2.7e-14)	9.5e-01 (6.7e-01)	7.6e-01 (5.3e-01)	9.5e-01 (6.7e-01)
ENSMUSG00000064220	3.37208	0.0663101	0.618258	61.6184	4.16605e-14	6.77856e-12	7.07378	0.0291037	0.162056	12.621	0.000381445	0.00963584	7.00073	0.00814767	0.0764313	30.3988	3.51753e-08	2.64153e-06	histone cluster 2, H2aa1 [Source:MGI Symbol;Acc:MGI:96097]	3	96245497	96246082	1	protein_coding	1	Hist2h2aa1	789	471	1150	1342	0.587928	0.350969	0.85693	0.35	0.69	0.86	1.68	histone cluster 2, H2aa1	6.8e-12 ( 4.2e-14)	6.2e-01 (6.6e-02)	1.6e-01 (2.9e-02)	6.2e-01 (6.6e-02)
ENSMUSG00000074254	1.32971	0.248857	0.832087	61.4388	4.55749e-14	7.33022e-12	4.12899	0.126882	0.369426	10.1561	0.00143823	0.0231902	8.91061	0.00283518	0.0385799	37.1418	1.09845e-09	1.26438e-07	cytochrome P450, family 2, subfamily a, polypeptide 4 [Source:MGI Symbol;Acc:MGI:88596]	7	26307169	26315088	1	protein_coding	1	Cyp2a4	485	1403	10	12	40.4167	116.917	0.833333	116.92	48.5	0.83	0.35	cytochrome P450, family 2, subfamily a, polypeptide 4	7.3e-12 ( 4.6e-14)	8.3e-01 (2.5e-01)	3.7e-01 (1.3e-01)	8.3e-01 (2.5e-01)
ENSMUSG00000038508	0.192059	0.661208	0.949826	60.2663	8.19113e-14	1.30248e-11	3.28604	0.193396	0.459922	6.58177	0.0103028	0.0837485	5.61502	0.0178072	0.122344	16.2929	5.42676e-05	0.00113574	growth differentiation factor 15 [Source:MGI Symbol;Acc:MGI:1346047]	8	70629393	70632456	-1	protein_coding	2	Gdf15	1563	2710	194	180	8.68333	15.0556	1.07778	15.06	8.06	1.08	0.58	growth differentiation factor 15	1.3e-11 ( 8.2e-14)	9.5e-01 (6.6e-01)	4.6e-01 (1.9e-01)	9.5e-01 (6.6e-01)
ENSMUSG00000040093	2.55472	0.109965	0.708579	60.2038	8.45123e-14	1.32874e-11	5.11655	0.0774384	0.284932	2.36001	0.124482	0.367756	2.09475	0.147806	0.411751	10.0394	0.0015323	0.0145255	BCL2 modifying factor [Source:MGI Symbol;Acc:MGI:2176433]	2	118528757	118549687	-1	protein_coding	8	Bmf	95	152	233	320	0.296875	0.475	0.728125	0.48	0.41	0.73	0.62	BCL2 modifying factor	1.3e-11 ( 8.5e-14)	7.1e-01 (1.1e-01)	2.8e-01 (7.7e-02)	7.1e-01 (1.1e-01)
ENSMUSG00000004221	0.403995	0.525033	0.929597	59.9552	9.56957e-14	1.48786e-11	0.96301	0.617853	0.809634	6.78239	0.00920615	0.0782318	5.95066	0.0147118	0.109195	19.5665	9.71556e-06	0.000287839	inhibitor of kappaB kinase gamma [Source:MGI Symbol;Acc:MGI:1338074]	X	74393290	74453854	1	protein_coding	18	Ikbkg	2005	2035	1388	1152	1.74045	1.76649	1.20486	1.77	1.44	1.2	0.99	inhibitor of kappaB kinase gamma	1.5e-11 ( 9.6e-14)	9.3e-01 (5.3e-01)	8.1e-01 (6.2e-01)	9.3e-01 (5.3e-01)
ENSMUSG00000026107	3.34742	0.0673104	0.618258	59.2052	1.39239e-13	2.11779e-11	6.76492	0.0339638	0.175325	5.72633	0.0167124	0.113086	4.62225	0.0315598	0.169937	9.99749	0.00156754	0.0147441	nucleic acid binding protein 1 [Source:MGI Symbol;Acc:MGI:1923258]	1	51465862	51478425	-1	protein_coding	10	Nabp1	798	694	395	209	3.81818	3.32057	1.88995	3.32	2.02	1.89	1.15	nucleic acid binding protein 1	2.1e-11 ( 1.4e-13)	6.2e-01 (6.7e-02)	1.8e-01 (3.4e-02)	6.2e-01 (6.7e-02)
ENSMUSG00000061540	43.8156	3.60813e-11	1.88904e-07	59.0259	1.52296e-13	2.2671e-11	52.4732	4.03259e-12	3.52675e-09	14.4129	0.000146795	0.00495733	10.603	0.00112907	0.0214514	6.12923	0.0132965	0.0701701	orosomucoid 2 [Source:MGI Symbol;Acc:MGI:97444]	4	63362449	63365878	1	protein_coding	1	Orm2	235	687	293	175	1.34286	3.92571	1.67429	3.93	0.8	1.67	0.34	orosomucoid 2	2.3e-11 ( 1.5e-13)	1.9e-07 (3.6e-11)	3.5e-09 (4.0e-12)	1.9e-07 (3.6e-11)
ENSMUSG00000036151	2.51567	0.11272	0.712306	58.8246	1.68421e-13	2.48075e-11	4.98741	0.0826034	0.29425	12.504	0.000406079	0.010021	10.2953	0.00133366	0.0236472	34.04	5.39903e-09	5.19306e-07	transmembrane 6 superfamily member 2 [Source:MGI Symbol;Acc:MGI:1933210]	8	70072924	70080066	1	protein_coding	5	Tm6sf2	913	1425	632	620	1.47258	2.29839	1.01935	2.3	1.44	1.02	0.64	transmembrane 6 superfamily member 2	2.5e-11 ( 1.7e-13)	7.1e-01 (1.1e-01)	2.9e-01 (8.3e-02)	7.1e-01 (1.1e-01)
ENSMUSG00000021765	9.63063	0.00191359	0.152217	58.6988	1.79361e-13	2.61437e-11	15.2308	0.000492814	0.0115124	28.7209	8.3598e-08	1.64449e-05	27.2627	1.77605e-07	3.51282e-05	128.967	6.89634e-30	4.84226e-26	follistatin [Source:MGI Symbol;Acc:MGI:95586]	13	114452290	114458951	-1	protein_coding	6	Fst	94	451	78	43	2.18605	10.4884	1.81395	10.49	1.21	1.81	0.21	follistatin	2.6e-11 ( 1.8e-13)	1.5e-01 (1.9e-03)	1.2e-02 (4.9e-04)	1.5e-01 (1.9e-03)
ENSMUSG00000054072	0.0595919	0.807142	0.979456	58.5363	1.94539e-13	2.80638e-11	38.3146	4.78733e-09	1.71767e-06	27.74	1.38766e-07	2.48158e-05	31.6969	1.80212e-08	5.27234e-06	46.6136	8.64592e-12	2.05787e-09	interferon inducible GTPase 1 [Source:MGI Symbol;Acc:MGI:1926259]	18	60376029	60392627	1	protein_coding	2	Iigp1	5259	2527	9291	5851	0.898821	0.431892	1.58793	0.43	0.57	1.59	2.08	interferon inducible GTPase 1	2.8e-11 ( 1.9e-13)	9.8e-01 (8.1e-01)	1.7e-06 (4.8e-09)	9.8e-01 (8.1e-01)
ENSMUSG00000042429	1.44466	0.229387	0.82063	58.0816	2.44203e-13	3.48687e-11	23.8623	6.58227e-06	0.000497868	20.1994	6.97739e-06	0.000539768	20.2097	6.94001e-06	0.000567258	20.2841	6.67541e-06	0.000215006	adenosine A1 receptor [Source:MGI Symbol;Acc:MGI:99401]	1	134199223	134235431	-1	protein_coding	4	Adora1	776	1882	491	497	1.56137	3.78672	0.987928	3.79	1.58	0.99	0.41	adenosine A1 receptor	3.5e-11 ( 2.4e-13)	8.2e-01 (2.3e-01)	5.0e-04 (6.6e-06)	8.2e-01 (2.3e-01)
ENSMUSG00000027890	0.570772	0.449952	0.910523	58.007	2.53483e-13	3.58282e-11	1.24387	0.536904	0.758571	5.64503	0.0175049	0.115775	4.78432	0.0287199	0.160619	24.4237	7.73122e-07	3.63109e-05	glutathione S-transferase, mu 4 [Source:MGI Symbol;Acc:MGI:95862]	3	108040408	108044894	-1	protein_coding	3	Gstm4	4302	7107	1073	829	5.18938	8.57298	1.29433	8.57	4.01	1.29	0.61	glutathione S-transferase, mu 4	3.6e-11 ( 2.5e-13)	9.1e-01 (4.5e-01)	7.6e-01 (5.4e-01)	9.1e-01 (4.5e-01)
ENSMUSG00000091867	0.0120543	0.912574	0.989072	57.8265	2.7742e-13	3.88193e-11	5.88712	0.0526778	0.227576	8.7334	0.00312434	0.0385503	8.26759	0.00403591	0.047909	21.4961	3.54557e-06	0.000126372	cytochrome P450, family 2, subfamily a, polypeptide 22 [Source:MGI Symbol;Acc:MGI:3648316]	7	26931631	26939384	-1	protein_coding	2	Cyp2a22	711	2062	45	65	10.9385	31.7231	0.692308	31.72	15.8	0.69	0.34	cytochrome P450, family 2, subfamily a, polypeptide 22	3.9e-11 ( 2.8e-13)	9.9e-01 (9.1e-01)	2.3e-01 (5.3e-02)	9.9e-01 (9.1e-01)
ENSMUSG00000031683	1.57018	0.21018	0.806517	57.7176	2.92939e-13	4.05851e-11	10.4558	0.00536484	0.0573006	23.9155	1.00657e-06	0.000123754	25.3022	4.90142e-07	8.09773e-05	41.0594	1.47675e-10	2.4114e-08	LSM6 homolog, U6 small nuclear RNA and mRNA degradation associated [Source:MGI Symbol;Acc:MGI:1925901]	8	78804865	78821140	-1	protein_coding	4	Lsm6	699	475	1086	940	0.743617	0.505319	1.15532	0.51	0.64	1.16	1.47	LSM6 homolog, U6 small nuclear RNA and mRNA degradation associated	4.1e-11 ( 2.9e-13)	8.1e-01 (2.1e-01)	5.7e-02 (5.4e-03)	8.1e-01 (2.1e-01)
ENSMUSG00000078566	2.91879	0.0875537	0.661828	57.357	3.5083e-13	4.8129e-11	2.92216	0.231986	0.504457	7.10545	0.00768498	0.0705481	6.9358	0.00844873	0.0784174	25.675	4.04025e-07	2.07829e-05	BCL2/adenovirus E1B interacting protein 3 [Source:MGI Symbol;Acc:MGI:109326]	7	138890836	138909519	-1	protein_coding	5	Bnip3	5816	6803	11233	10523	0.552694	0.646489	1.06747	0.65	0.52	1.07	0.85	BCL2/adenovirus E1B interacting protein 3	4.8e-11 ( 3.5e-13)	6.6e-01 (8.8e-02)	5.0e-01 (2.3e-01)	6.6e-01 (8.8e-02)
ENSMUSG00000032350	0.00183113	0.965868	0.996292	57.2111	3.77366e-13	5.12668e-11	5.60571	0.0606366	0.246036	1.49019	0.222188	0.50189	1.27942	0.258008	0.551905	8.12429	0.0043676	0.0318785	glutamate-cysteine ligase, catalytic subunit [Source:MGI Symbol;Acc:MGI:104990]	9	77754535	77794485	1	protein_coding	3	Gclc	11986	8867	5560	3323	3.60698	2.66837	1.67319	2.67	2.16	1.67	1.35	glutamate-cysteine ligase, catalytic subunit	5.1e-11 ( 3.8e-13)	1.0e+00 (9.7e-01)	2.5e-01 (6.1e-02)	1.0e+00 (9.7e-01)
ENSMUSG00000036528	0.510449	0.474945	0.915782	56.7144	4.83759e-13	6.4469e-11	6.49647	0.0388428	0.190845	13.9313	0.000189614	0.00594756	13.1527	0.000287108	0.00872697	37.4199	9.52437e-10	1.12396e-07	PTPRF interacting protein, binding protein 2 (liprin beta 2) [Source:MGI Symbol;Acc:MGI:894649]	7	107595207	107748583	1	protein_coding	6	Ppfibp2	620	789	395	440	1.40909	1.79318	0.897727	1.79	1.57	0.9	0.79	PTPRF interacting protein, binding protein 2 (liprin beta 2)	6.4e-11 ( 4.8e-13)	9.2e-01 (4.7e-01)	1.9e-01 (3.9e-02)	9.2e-01 (4.7e-01)
ENSMUSG00000044345	0.0116797	0.913938	0.989072	56.0472	6.7531e-13	8.74964e-11	0.0560595	0.972359	0.987541	4.63554	0.0313163	0.165031	4.02416	0.044853	0.208913	20.8709	4.91291e-06	0.000168084	MARVEL (membrane-associating) domain containing 1 [Source:MGI Symbol;Acc:MGI:2147570]	19	42147400	42151703	1	protein_coding	2	Marveld1	617	632	949	1291	0.477924	0.489543	0.735089	0.49	0.65	0.74	0.98	MARVEL (membrane-associating) domain containing 1	8.7e-11 ( 6.8e-13)	9.9e-01 (9.1e-01)	9.9e-01 (9.7e-01)	9.9e-01 (9.1e-01)
ENSMUSG00000048007	11.1506	0.000840031	0.102279	55.9227	7.18691e-13	9.16079e-11	14.6337	0.00066424	0.0141257	6.18382	0.0128924	0.0960128	6.67348	0.00978577	0.0857277	16.6935	4.39304e-05	0.000962425	translocase of inner mitochondrial membrane 8A1 [Source:MGI Symbol;Acc:MGI:1353433]	X	134537256	134541865	-1	protein_coding	1	Timm8a1	630	711	1135	863	0.730012	0.82387	1.31518	0.82	0.56	1.32	0.89	translocase of inner mitochondrial membrane 8A1	9.2e-11 ( 7.2e-13)	1.0e-01 (8.4e-04)	1.4e-02 (6.6e-04)	1.0e-01 (8.4e-04)
ENSMUSG00000035757	0.00598005	0.93836	0.993666	55.7253	7.93226e-13	9.99964e-11	3.31174	0.190926	0.457548	14.3504	0.000151747	0.00508605	13.8766	0.000195218	0.00678576	59.0826	1.51188e-14	7.08381e-12	selenoprotein O [Source:MGI Symbol;Acc:MGI:1919007]	15	89089084	89100340	1	protein_coding	2	Selenoo	1904	1441	2574	2636	0.722307	0.546662	0.97648	0.55	0.74	0.98	1.32	selenoprotein O	1.0e-10 ( 7.9e-13)	9.9e-01 (9.4e-01)	4.6e-01 (1.9e-01)	9.9e-01 (9.4e-01)
ENSMUSG00000027999	14.7451	0.000123068	0.0339118	55.3747	9.45244e-13	1.18096e-10	31.5619	1.40094e-07	2.45042e-05	53.428	2.68242e-13	2.63835e-10	51.1554	8.53336e-13	9.98617e-10	50.8163	1.01429e-12	3.09646e-10	phospholipase A2, group XIIA [Source:MGI Symbol;Acc:MGI:1913600]	3	129878606	129895825	1	protein_coding	4	Pla2g12a	637	1476	580	576	1.1059	2.5625	1.00694	2.56	1.1	1.01	0.43	phospholipase A2, group XIIA	1.2e-10 ( 9.5e-13)	3.4e-02 (1.2e-04)	2.5e-05 (1.4e-07)	3.4e-02 (1.2e-04)
ENSMUSG00000030364	16.39	5.15569e-05	0.0192804	55.2042	1.02936e-12	1.27468e-10	37.3205	7.86949e-09	2.62185e-06	11.7021	0.000624306	0.0134956	11.8684	0.000570943	0.0134979	6.09207	0.013579	0.0711809	C-type lectin domain family 2, member h [Source:MGI Symbol;Acc:MGI:2136934]	6	128662385	128677374	1	protein_coding	4	Clec2h	97	16	141	175	0.554286	0.0914286	0.805714	0.09	0.69	0.81	6.06	C-type lectin domain family 2, member h	1.3e-10 ( 1.0e-12)	1.9e-02 (5.2e-05)	2.6e-06 (7.9e-09)	1.9e-02 (5.2e-05)
ENSMUSG00000001419	9.0055	0.00269168	0.191732	54.425	1.51972e-12	1.86539e-10	31.0734	1.78853e-07	2.84397e-05	52.2225	4.95562e-13	4.26493e-10	48.9886	2.57455e-12	2.75985e-09	61.2815	4.94717e-15	2.48118e-12	myocyte enhancer factor 2D [Source:MGI Symbol;Acc:MGI:99533]	3	88142372	88172086	1	protein_coding	7	Mef2d	841	1664	695	851	0.988249	1.95535	0.816686	1.96	1.21	0.82	0.51	myocyte enhancer factor 2D	1.9e-10 ( 1.5e-12)	1.9e-01 (2.7e-03)	2.8e-05 (1.8e-07)	1.9e-01 (2.7e-03)
ENSMUSG00000035864	0.0240279	0.876814	0.98478	53.949	1.92804e-12	2.346e-10	24.597	4.55847e-06	0.000370852	15.0465	0.000104894	0.00388333	17.4973	2.8772e-05	0.0017341	28.1022	1.15078e-07	7.18237e-06	synaptotagmin I [Source:MGI Symbol;Acc:MGI:99667]	10	108497650	109010982	-1	protein_coding	6	Syt1	157	105	309	224	0.700893	0.46875	1.37946	0.47	0.51	1.38	1.5	synaptotagmin I	2.3e-10 ( 1.9e-12)	9.8e-01 (8.8e-01)	3.7e-04 (4.6e-06)	9.8e-01 (8.8e-01)
ENSMUSG00000063558	0.0115097	0.914564	0.989072	53.86	2.01584e-12	2.43169e-10	0.903831	0.636408	0.821139	6.25125	0.0124106	0.0937947	5.87852	0.0153267	0.112042	17.2283	3.31468e-05	0.000770664	aldehyde oxidase 1 [Source:MGI Symbol;Acc:MGI:88035]	1	58029931	58106413	1	protein_coding	2	Aox1	2192	2579	1190	1321	1.65935	1.95231	0.900833	1.95	1.84	0.9	0.85	aldehyde oxidase 1	2.4e-10 ( 2.0e-12)	9.9e-01 (9.1e-01)	8.2e-01 (6.4e-01)	9.9e-01 (9.1e-01)
ENSMUSG00000031767	10.1904	0.00141172	0.131984	53.7389	2.14168e-12	2.56142e-10	43.2553	4.04795e-10	1.95321e-07	15.6251	7.72236e-05	0.00318374	16.2903	5.43423e-05	0.00273523	26.6914	2.38679e-07	1.32481e-05	nudix (nucleoside diphosphate linked moiety X)-type motif 7 [Source:MGI Symbol;Acc:MGI:1914778]	8	114133557	114154739	1	protein_coding	5	Nudt7	9175	2448	9840	9749	0.941122	0.251103	1.00933	0.25	0.93	1.01	3.75	nudix (nucleoside diphosphate linked moiety X)-type motif 7	2.6e-10 ( 2.1e-12)	1.3e-01 (1.4e-03)	2.0e-07 (4.0e-10)	1.3e-01 (1.4e-03)
ENSMUSG00000025232	5.01176	0.0251757	0.461289	53.7102	2.17261e-12	2.57639e-10	7.47786	0.0237795	0.143364	14.6809	0.000127331	0.00447284	12.4203	0.000424681	0.0110466	20.8204	5.04418e-06	0.0001711	hexosaminidase A [Source:MGI Symbol;Acc:MGI:96073]	9	59539540	59565109	1	protein_coding	1	Hexa	2031	2593	1589	1433	1.41731	1.80949	1.10886	1.81	1.28	1.11	0.78	hexosaminidase A	2.6e-10 ( 2.2e-12)	4.6e-01 (2.5e-02)	1.4e-01 (2.4e-02)	4.6e-01 (2.5e-02)
ENSMUSG00000023206	5.85903	0.0154974	0.388213	53.6493	2.23977e-12	2.63371e-10	5.8981	0.0523894	0.226961	11.064	0.000880181	0.0168569	8.94958	0.00277534	0.038285	20.785	5.13851e-06	0.000173779	interleukin 15 receptor, alpha chain [Source:MGI Symbol;Acc:MGI:104644]	2	11705290	11734317	1	protein_coding	18	Il15ra	873	685	1033	1454	0.600413	0.471114	0.710454	0.47	0.85	0.71	1.27	interleukin 15 receptor, alpha chain	2.6e-10 ( 2.2e-12)	3.9e-01 (1.5e-02)	2.3e-01 (5.2e-02)	3.9e-01 (1.5e-02)
ENSMUSG00000029817	6.5876	0.0102691	0.333938	53.5195	2.38995e-12	2.78688e-10	6.99781	0.0302305	0.165499	2.46061	0.116733	0.353797	2.22375	0.135902	0.392207	11.0097	0.000906377	0.00969403	transformer 2 alpha [Source:MGI Symbol;Acc:MGI:1933972]	6	49243924	49264033	-1	protein_coding	5	Tra2a	666	567	337	402	1.65672	1.41045	0.838308	1.41	1.98	0.84	1.17	transformer 2 alpha	2.8e-10 ( 2.4e-12)	3.3e-01 (1.0e-02)	1.7e-01 (3.0e-02)	3.3e-01 (1.0e-02)
ENSMUSG00000064254	0.474564	0.490895	0.920199	53.4681	2.45215e-12	2.83578e-10	1.63797	0.44088	0.694384	4.25351	0.0391692	0.187343	3.53542	0.0600711	0.247456	14.879	0.000114634	0.00203001	ethylmalonic encephalopathy 1 [Source:MGI Symbol;Acc:MGI:1913321]	7	24587543	24608925	1	protein_coding	1	Ethe1	1828	2727	952	961	1.90219	2.83767	0.990635	2.84	1.92	0.99	0.67	ethylmalonic encephalopathy 1	2.8e-10 ( 2.5e-12)	9.2e-01 (4.9e-01)	6.9e-01 (4.4e-01)	9.2e-01 (4.9e-01)
ENSMUSG00000025270	3.43252	0.0639244	0.615768	53.1905	2.81724e-12	3.23128e-10	9.11219	0.010503	0.0871184	10.3999	0.00126024	0.0214207	10.3842	0.00127099	0.0230303	58.4665	2.06777e-14	9.07429e-12	aminolevulinic acid synthase 2, erythroid [Source:MGI Symbol;Acc:MGI:87990]	X	150547375	150570638	1	protein_coding	4	Alas2	1262	958	1858	2508	0.50319	0.381978	0.740829	0.38	0.68	0.74	1.32	aminolevulinic acid synthase 2, erythroid	3.2e-10 ( 2.8e-12)	6.2e-01 (6.4e-02)	8.7e-02 (1.1e-02)	6.2e-01 (6.4e-02)
ENSMUSG00000062300	3.45431	0.0630872	0.614102	53.1442	2.88319e-12	3.28004e-10	3.54704	0.169735	0.430427	9.13802	0.00250352	0.0335998	7.2584	0.00705702	0.0695471	23.6044	1.18317e-06	5.06563e-05	nectin cell adhesion molecule 2 [Source:MGI Symbol;Acc:MGI:97822]	7	19716644	19750483	-1	protein_coding	3	Nectin2	1140	1075	1440	1711	0.666277	0.628288	0.841613	0.63	0.79	0.84	1.06	nectin cell adhesion molecule 2	3.3e-10 ( 2.9e-12)	6.1e-01 (6.3e-02)	4.3e-01 (1.7e-01)	6.1e-01 (6.3e-02)
ENSMUSG00000021477	8.95189	0.00277183	0.192372	53.0031	3.09406e-12	3.49155e-10	18.8667	8.00111e-05	0.00327367	38.7082	4.92144e-10	1.93624e-07	31.4493	2.04721e-08	5.7498e-06	53.6471	2.39939e-13	8.42367e-11	cathepsin L [Source:MGI Symbol;Acc:MGI:88564]	13	64359337	64370890	-1	protein_coding	7	Ctsl	17348	26967	15615	15024	1.15469	1.79493	1.03934	1.79	1.11	1.04	0.64	cathepsin L	3.5e-10 ( 3.1e-12)	1.9e-01 (2.8e-03)	3.3e-03 (8.0e-05)	1.9e-01 (2.8e-03)
ENSMUSG00000020131	3.5885	0.0581809	0.599862	52.9679	3.14896e-12	3.52507e-10	3.83883	0.146693	0.399586	3.07422	0.0795425	0.281786	2.92173	0.0873943	0.307897	11.8741	0.000569212	0.00680925	proprotein convertase subtilisin/kexin type 4 [Source:MGI Symbol;Acc:MGI:97514]	10	80321283	80329498	-1	protein_coding	6	Pcsk4	252	348	424	774	0.325581	0.449612	0.547804	0.45	0.59	0.55	0.72	proprotein convertase subtilisin/kexin type 4	3.5e-10 ( 3.1e-12)	6.0e-01 (5.8e-02)	4.0e-01 (1.5e-01)	6.0e-01 (5.8e-02)
ENSMUSG00000040511	17.6174	2.70111e-05	0.012856	52.8497	3.34061e-12	3.70993e-10	27.4344	1.10332e-06	0.000123511	171.131	4.18859e-39	5.76769e-35	145.697	1.5124e-33	2.12387e-29	69.326	8.34635e-17	6.16883e-14	poliovirus receptor [Source:MGI Symbol;Acc:MGI:107741]	7	19903578	19921160	-1	protein_coding	5	Pvr	185	415	148	133	1.39098	3.1203	1.11278	3.12	1.25	1.11	0.45	poliovirus receptor	3.7e-10 ( 3.3e-12)	1.3e-02 (2.7e-05)	1.2e-04 (1.1e-06)	1.3e-02 (2.7e-05)
ENSMUSG00000021236	3.16791	0.0750984	0.634158	52.5123	3.9546e-12	4.32318e-10	4.15977	0.124945	0.366999	5.85703	0.0155149	0.108056	4.7968	0.0285127	0.159969	15.9035	6.66543e-05	0.00132582	ectonucleoside triphosphate diphosphohydrolase 5 [Source:MGI Symbol;Acc:MGI:1321385]	12	84373857	84409029	-1	protein_coding	8	Entpd5	10353	11563	6392	4225	2.45041	2.7368	1.5129	2.74	1.62	1.51	0.9	ectonucleoside triphosphate diphosphohydrolase 5	4.3e-10 ( 4.0e-12)	6.3e-01 (7.5e-02)	3.7e-01 (1.2e-01)	6.3e-01 (7.5e-02)
ENSMUSG00000066154	9.62555	0.00191888	0.152217	52.1512	4.73708e-12	5.13845e-10	21.7154	1.92561e-05	0.00113954	9.09778	0.0025592	0.0339501	8.91423	0.00282958	0.0385784	38.6403	5.09566e-10	6.44669e-08	major urinary protein 3 [Source:MGI Symbol;Acc:MGI:97235]	4	62083476	62087342	-1	protein_coding	3	Mup3	215767	94134	293903	280559	0.769061	0.335523	1.04756	0.34	0.73	1.05	2.29	major urinary protein 3	5.1e-10 ( 4.7e-12)	1.5e-01 (1.9e-03)	1.1e-03 (1.9e-05)	1.5e-01 (1.9e-03)
ENSMUSG00000044469	10.4446	0.0012301	0.122528	51.5384	6.43551e-12	6.92708e-10	12.7344	0.00171695	0.026904	15.5333	8.10642e-05	0.00327347	12.7309	0.000359667	0.00996215	23.8829	1.02378e-06	4.54966e-05	tumor necrosis factor, alpha-induced protein 8-like 1 [Source:MGI Symbol;Acc:MGI:1913693]	17	56162477	56173955	1	protein_coding	1	Tnfaip8l1	584	361	588	917	0.636859	0.393675	0.641221	0.39	0.99	0.64	1.62	tumor necrosis factor, alpha-induced protein 8-like 1	6.9e-10 ( 6.4e-12)	1.2e-01 (1.2e-03)	2.7e-02 (1.7e-03)	1.2e-01 (1.2e-03)
ENSMUSG00000027556	1.52723	0.216529	0.809741	51.4039	6.88315e-12	7.35236e-10	5.97947	0.0503007	0.221967	18.1536	2.03782e-05	0.00124715	16.8416	4.06324e-05	0.00218621	36.3788	1.6246e-09	1.7964e-07	carbonic anhydrase 1 [Source:MGI Symbol;Acc:MGI:88268]	3	14766216	14808368	-1	protein_coding	3	Car1	75	51	156	168	0.446429	0.303571	0.928571	0.3	0.48	0.93	1.47	carbonic anhydrase 1	7.4e-10 ( 6.9e-12)	8.1e-01 (2.2e-01)	2.2e-01 (5.0e-02)	8.1e-01 (2.2e-01)
ENSMUSG00000045969	0.159259	0.68984	0.95716	51.1291	7.89672e-12	8.37112e-10	9.43216	0.00895018	0.0788213	16.7587	4.24479e-05	0.00208876	16.4872	4.89786e-05	0.0025287	30.4497	3.42637e-08	2.6009e-06	inhibitor of growth family, member 1 [Source:MGI Symbol;Acc:MGI:1349481]	8	11555571	11563251	1	protein_coding	7	Ing1	338	249	471	434	0.778802	0.573733	1.08525	0.57	0.72	1.09	1.36	inhibitor of growth family, member 1	8.4e-10 ( 7.9e-12)	9.6e-01 (6.9e-01)	7.9e-02 (9.0e-03)	9.6e-01 (6.9e-01)
ENSMUSG00000026839	5.07669	0.0242496	0.455049	50.5787	1.03987e-11	1.09406e-09	11.042	0.00400192	0.0478214	1.77577	0.18267	0.452567	1.66658	0.196717	0.477001	10.0163	0.00155157	0.0146331	uridine phosphorylase 2 [Source:MGI Symbol;Acc:MGI:1923904]	2	58567298	58792971	1	protein_coding	10	Upp2	7713	14309	20368	26173	0.294693	0.546708	0.778207	0.55	0.38	0.78	0.54	uridine phosphorylase 2	1.1e-09 ( 1.0e-11)	4.6e-01 (2.4e-02)	4.8e-02 (4.0e-03)	4.6e-01 (2.4e-02)
ENSMUSG00000006800	2.91024	0.0880189	0.663532	50.4668	1.09971e-11	1.14838e-09	44.7274	1.93892e-10	1.08525e-07	7.61007	0.00580433	0.0581259	7.29427	0.0069175	0.0690422	9.2558	0.00234751	0.0198951	sulfatase 2 [Source:MGI Symbol;Acc:MGI:1919293]	2	166073089	166155663	-1	protein_coding	7	Sulf2	306	512	154	303	1.0099	1.68977	0.508251	1.69	1.99	0.51	0.6	sulfatase 2	1.1e-09 ( 1.1e-11)	6.6e-01 (8.8e-02)	1.1e-07 (1.9e-10)	6.6e-01 (8.8e-02)
ENSMUSG00000018427	1.22797	0.267803	0.845009	50.3283	1.17855e-11	1.22159e-09	1.7936	0.407873	0.671029	9.92248	0.00163272	0.0253753	8.29633	0.00397253	0.0474495	29.0285	7.13224e-08	4.74683e-06	yippee like 2 [Source:MGI Symbol;Acc:MGI:1925114]	11	86936425	86993707	-1	protein_coding	1	Ypel2	472	506	316	206	2.29126	2.45631	1.53398	2.46	1.49	1.53	0.93	yippee like 2	1.2e-09 ( 1.2e-11)	8.5e-01 (2.7e-01)	6.7e-01 (4.1e-01)	8.5e-01 (2.7e-01)
ENSMUSG00000026202	0.134224	0.714092	0.961828	50.2544	1.22291e-11	1.25825e-09	1.9269	0.381575	0.64948	1.83944	0.175017	0.441803	1.82303	0.176953	0.454953	17.9168	2.30772e-05	0.000573581	tubulin, alpha 4A [Source:MGI Symbol;Acc:MGI:1095410]	1	75214228	75219865	-1	protein_coding	8	Tuba4a	5961	4940	3404	2761	2.159	1.78921	1.23289	1.79	1.75	1.23	1.21	tubulin, alpha 4A	1.3e-09 ( 1.2e-11)	9.6e-01 (7.1e-01)	6.5e-01 (3.8e-01)	9.6e-01 (7.1e-01)
ENSMUSG00000028957	0.373486	0.54111	0.933709	50.131	1.30075e-11	1.32857e-09	4.03392	0.133059	0.378928	3.30711	0.0689808	0.2591	2.7296	0.0985041	0.330059	13.1366	0.000289589	0.00407485	period circadian clock 3 [Source:MGI Symbol;Acc:MGI:1277134]	4	151003652	151044665	-1	protein_coding	5	Per3	199	284	330	754	0.263926	0.376658	0.437666	0.38	0.6	0.44	0.7	period circadian clock 3	1.3e-09 ( 1.3e-11)	9.3e-01 (5.4e-01)	3.8e-01 (1.3e-01)	9.3e-01 (5.4e-01)
ENSMUSG00000059248	9.55352	0.00199567	0.15479	50.0818	1.33314e-11	1.35178e-09	10.0313	0.00663347	0.0650471	0.330975	0.565085	0.79748	0.355476	0.551029	0.78928	7.03416	0.00799695	0.0490184	septin 9 [Source:MGI Symbol;Acc:MGI:1858222]	11	117199661	117362325	1	protein_coding	10	2018-09-09	1382	1015	644	667	2.07196	1.52174	0.965517	1.52	2.15	0.97	1.36	septin 9	1.4e-09 ( 1.3e-11)	1.5e-01 (2.0e-03)	6.5e-02 (6.6e-03)	1.5e-01 (2.0e-03)
ENSMUSG00000081534	3.71418	0.053952	0.58713	49.7104	1.60518e-11	1.593e-09	4.64751	0.0979052	0.322502	6.98322	0.00822773	0.0729529	6.54615	0.0105111	0.0890812	31.3007	2.21003e-08	1.76338e-06	solute carrier family 48 (heme transporter), member 1 [Source:MGI Symbol;Acc:MGI:1914989]	15	97778520	97792692	1	protein_coding	4	Slc48a1	2015	2621	1304	1116	1.80556	2.34857	1.16846	2.35	1.55	1.17	0.77	solute carrier family 48 (heme transporter), member 1	1.6e-09 ( 1.6e-11)	5.9e-01 (5.4e-02)	3.2e-01 (9.8e-02)	5.9e-01 (5.4e-02)
ENSMUSG00000016024	11.7274	0.000615856	0.0933258	49.5643	1.72683e-11	1.70166e-09	23.0113	1.00732e-05	0.00068758	23.6107	1.17929e-06	0.000138282	20.9571	4.69677e-06	0.000436799	28.6658	8.60082e-08	5.51513e-06	lipopolysaccharide binding protein [Source:MGI Symbol;Acc:MGI:1098776]	2	158306493	158332852	1	protein_coding	5	Lbp	3113	5787	3073	2427	1.28265	2.38443	1.26617	2.38	1.01	1.27	0.54	lipopolysaccharide binding protein	1.7e-09 ( 1.7e-11)	9.3e-02 (6.2e-04)	6.9e-04 (1.0e-05)	9.3e-02 (6.2e-04)
ENSMUSG00000019970	5.18639	0.0227644	0.440041	49.2876	1.98305e-11	1.93811e-09	11.4722	0.00322733	0.0412013	40.2283	2.25951e-10	1.07288e-07	38.1599	6.51798e-10	3.23043e-07	178.464	1.0492e-40	1.4734e-36	serum/glucocorticoid regulated kinase 1 [Source:MGI Symbol;Acc:MGI:1340062]	10	21882184	21999903	1	protein_coding	13	Sgk1	1054	2539	464	477	2.20964	5.32285	0.972746	5.32	2.27	0.97	0.42	serum/glucocorticoid regulated kinase 1	1.9e-09 ( 2.0e-11)	4.4e-01 (2.3e-02)	4.1e-02 (3.2e-03)	4.4e-01 (2.3e-02)
ENSMUSG00000001473	0.018385	0.892144	0.987384	49.2761	1.99449e-11	1.93811e-09	9.82635	0.0073491	0.0700517	19.7349	8.89637e-06	0.000636907	20.8263	5.02865e-06	0.000455596	45.9411	1.21859e-11	2.80536e-09	tubulin, beta 6 class V [Source:MGI Symbol;Acc:MGI:1915201]	18	67390717	67402748	1	protein_coding	1	Tubb6	160	226	80	109	1.46789	2.07339	0.733945	2.07	2	0.73	0.71	tubulin, beta 6 class V	1.9e-09 ( 2.0e-11)	9.9e-01 (8.9e-01)	7.0e-02 (7.3e-03)	9.9e-01 (8.9e-01)
ENSMUSG00000022389	6.82378	0.00899519	0.317789	49.1296	2.1461e-11	2.07106e-09	11.1705	0.00375287	0.0456757	1.30107	0.254018	0.538235	1.30553	0.253205	0.547601	9.86492	0.0016846	0.0155534	thyrotroph embryonic factor [Source:MGI Symbol;Acc:MGI:98663]	15	81802421	81826863	1	protein_coding	10	Tef	2376	3209	4036	4165	0.570468	0.770468	0.969028	0.77	0.59	0.97	0.74	thyrotroph embryonic factor	2.1e-09 ( 2.1e-11)	3.2e-01 (9.0e-03)	4.6e-02 (3.8e-03)	3.2e-01 (9.0e-03)
ENSMUSG00000049382	1.17311	0.278762	0.849668	48.4874	2.95869e-11	2.83568e-09	1.67605	0.432563	0.688117	1.98311	0.159064	0.420088	1.61617	0.203627	0.485841	26.27	2.96864e-07	1.62058e-05	keratin 8 [Source:MGI Symbol;Acc:MGI:96705]	15	101996698	102004482	-1	protein_coding	1	Krt8	7157	7227	4559	3934	1.81927	1.83706	1.15887	1.84	1.57	1.16	0.99	keratin 8	2.8e-09 ( 3.0e-11)	8.5e-01 (2.8e-01)	6.9e-01 (4.3e-01)	8.5e-01 (2.8e-01)
ENSMUSG00000036478	9.90927	0.00164448	0.141142	47.713	4.35762e-11	4.12001e-09	9.95202	0.00690156	0.0669762	13.0683	0.000300337	0.00807884	9.66265	0.00188052	0.0296095	16.9157	3.90775e-05	0.000886535	B cell translocation gene 1, anti-proliferative [Source:MGI Symbol;Acc:MGI:88215]	10	96617006	96622809	1	protein_coding	2	Btg1	1411	1673	1293	983	1.4354	1.70193	1.31536	1.7	1.09	1.32	0.84	B cell translocation gene 1, anti-proliferative	4.1e-09 ( 4.4e-11)	1.4e-01 (1.6e-03)	6.7e-02 (6.9e-03)	1.4e-01 (1.6e-03)
ENSMUSG00000036775	0.144945	0.703414	0.959665	47.6852	4.4186e-11	4.14963e-09	21.3509	2.31057e-05	0.00130898	20.2075	6.94806e-06	0.000539768	22.4459	2.16144e-06	0.000239001	44.4352	2.62924e-11	5.50545e-09	2-4-dienoyl-Coenzyme A reductase 2, peroxisomal [Source:MGI Symbol;Acc:MGI:1347059]	17	26081211	26090329	-1	protein_coding	5	Decr2	7704	5021	10599	8064	0.955357	0.622644	1.31436	0.62	0.73	1.31	1.53	2-4-dienoyl-Coenzyme A reductase 2, peroxisomal	4.1e-09 ( 4.4e-11)	9.6e-01 (7.0e-01)	1.3e-03 (2.3e-05)	9.6e-01 (7.0e-01)
ENSMUSG00000071335	2.9639	0.0851421	0.654089	47.6515	4.49375e-11	4.19207e-09	4.59109	0.100707	0.327767	2.8556	0.0910562	0.306195	2.64175	0.104089	0.339225	11.6727	0.00063425	0.00736364	major facilitator superfamily domain containing 4B3 [Source:MGI Symbol;Acc:MGI:3773841]	10	39946907	39960153	-1	protein_coding	1	Mfsd4b3	489	384	298	249	1.96386	1.54217	1.19679	1.54	1.64	1.2	1.27	major facilitator superfamily domain containing 4B3	4.2e-09 ( 4.5e-11)	6.5e-01 (8.5e-02)	3.3e-01 (1.0e-01)	6.5e-01 (8.5e-02)
ENSMUSG00000040430	3.98312	0.0459584	0.564825	47.2204	5.57463e-11	5.16595e-09	23.5866	7.55485e-06	0.000547746	32.0686	1.48824e-08	3.4155e-06	32.3997	1.25503e-08	4.0987e-06	29.6674	5.12904e-08	3.58344e-06	phosphatidylinositol transfer protein, cytoplasmic 1 [Source:MGI Symbol;Acc:MGI:1919045]	11	107207892	107470699	-1	protein_coding	4	Pitpnc1	586	977	479	557	1.05206	1.75404	0.859964	1.75	1.22	0.86	0.6	phosphatidylinositol transfer protein, cytoplasmic 1	5.2e-09 ( 5.6e-11)	5.6e-01 (4.6e-02)	5.5e-04 (7.6e-06)	5.6e-01 (4.6e-02)
ENSMUSG00000023057	10.9262	0.000948121	0.109096	47.1389	5.80645e-11	5.34538e-09	18.8241	8.17342e-05	0.00329497	9.08085	0.002583	0.0340967	8.16449	0.00427185	0.0497427	13	0.000311489	0.00428847	fatty acid binding protein 2, intestinal [Source:MGI Symbol;Acc:MGI:95478]	3	122895072	122899506	1	protein_coding	1	Fabp2	2287	1100	2981	3826	0.597752	0.287507	0.779143	0.29	0.77	0.78	2.08	fatty acid binding protein 2, intestinal	5.3e-09 ( 5.8e-11)	1.1e-01 (9.5e-04)	3.3e-03 (8.2e-05)	1.1e-01 (9.5e-04)
ENSMUSG00000032288	0.000656643	0.979556	0.997547	47.0998	5.92109e-11	5.41528e-09	1.78753	0.409112	0.671993	6.84449	0.00889153	0.076859	5.65517	0.017404	0.121052	23.3846	1.32636e-06	5.49441e-05	IMP3, U3 small nucleolar ribonucleoprotein [Source:MGI Symbol;Acc:MGI:1916119]	9	56937475	56938398	1	protein_coding	1	Imp3	722	726	1088	1230	0.586992	0.590244	0.884553	0.59	0.66	0.88	0.99	IMP3, U3 small nucleolar ribonucleoprotein	5.4e-09 ( 5.9e-11)	1.0e+00 (9.8e-01)	6.7e-01 (4.1e-01)	1.0e+00 (9.8e-01)
ENSMUSG00000031960	3.60794	0.0575042	0.596165	47.0537	6.05912e-11	5.50554e-09	6.07405	0.0479775	0.215995	17.0379	3.66413e-05	0.00187289	14.8752	0.000114861	0.00464376	29.8839	4.58702e-08	3.28651e-06	alanyl-tRNA synthetase [Source:MGI Symbol;Acc:MGI:2384560]	8	111033144	111057664	1	protein_coding	7	Aars	5089	5915	4312	4004	1.27098	1.47727	1.07692	1.48	1.18	1.08	0.86	alanyl-tRNA synthetase	5.5e-09 ( 6.1e-11)	6.0e-01 (5.8e-02)	2.2e-01 (4.8e-02)	6.0e-01 (5.8e-02)
ENSMUSG00000062619	1.12131	0.289637	0.854293	46.6564	7.39098e-11	6.62961e-09	4.0111	0.134587	0.381225	22.9919	1.62686e-06	0.000171006	20.4054	6.26531e-06	0.000530022	50.4279	1.23627e-12	3.69381e-10	RIKEN cDNA 2310039H08 gene [Source:MGI Symbol;Acc:MGI:1914351]	17	46772635	46773407	1	protein_coding	1	2310039H08Rik	781	614	1308	1191	0.655751	0.515533	1.09824	0.52	0.6	1.1	1.27	RIKEN cDNA 2310039H08 gene	6.6e-09 ( 7.4e-11)	8.5e-01 (2.9e-01)	3.8e-01 (1.3e-01)	8.5e-01 (2.9e-01)
ENSMUSG00000020520	0.00748905	0.931038	0.99152	46.0858	9.83079e-11	8.76193e-09	1.94918	0.377346	0.645897	5.6213	0.0177435	0.116624	5.15893	0.0231272	0.141865	29.4271	5.806e-08	3.99675e-06	polypeptide N-acetylgalactosaminyltransferase 10 [Source:MGI Symbol;Acc:MGI:1890480]	11	57645442	57787514	1	protein_coding	2	Galnt10	221	233	124	82	2.69512	2.84146	1.5122	2.84	1.78	1.51	0.95	polypeptide N-acetylgalactosaminyltransferase 10	8.8e-09 ( 9.8e-11)	9.9e-01 (9.3e-01)	6.5e-01 (3.8e-01)	9.9e-01 (9.3e-01)
ENSMUSG00000056148	1.61588	0.203668	0.80192	46.023	1.01444e-10	8.98419e-09	2.39153	0.302472	0.580764	1.35612	0.244212	0.527415	1.19675	0.273973	0.569394	11.6624	0.000637749	0.00739546	retinol dehydrogenase 9 [Source:MGI Symbol;Acc:MGI:2143528]	10	127776386	127792697	1	protein_coding	3	Rdh9	1173	1111	2084	2399	0.488954	0.46311	0.868695	0.46	0.56	0.87	1.06	retinol dehydrogenase 9	9.0e-09 ( 1.0e-10)	8.0e-01 (2.0e-01)	5.8e-01 (3.0e-01)	8.0e-01 (2.0e-01)
ENSMUSG00000026317	19.3963	1.06214e-05	0.00654214	45.9422	1.0563e-10	9.29614e-09	21.9315	1.72835e-05	0.00106074	50.7315	1.05907e-12	8.10188e-10	44.9245	2.04778e-11	1.69158e-08	33.8854	5.84552e-09	5.5093e-07	ceroid-lipofuscinosis, neuronal 8 [Source:MGI Symbol;Acc:MGI:1349447]	8	14881335	14901720	1	protein_coding	5	Cln8	1416	2390	1416	1092	1.2967	2.18864	1.2967	2.19	1	1.3	0.59	ceroid-lipofuscinosis, neuronal 8	9.3e-09 ( 1.1e-10)	6.5e-03 (1.1e-05)	1.1e-03 (1.7e-05)	6.5e-03 (1.1e-05)
ENSMUSG00000060224	2.61521	0.105843	0.701447	45.0869	1.61993e-10	1.40793e-08	14.0951	0.000869541	0.01721	5.09999	0.023926	0.139839	4.85982	0.0274891	0.156923	11.5561	0.000675268	0.00771586	pyridine nucleotide-disulphide oxidoreductase domain 2 [Source:MGI Symbol;Acc:MGI:1921830]	19	42725858	42752775	-1	protein_coding	1	Pyroxd2	646	699	333	479	1.34864	1.45929	0.695198	1.46	1.94	0.7	0.92	pyridine nucleotide-disulphide oxidoreductase domain 2	1.4e-08 ( 1.6e-10)	7.0e-01 (1.1e-01)	1.7e-02 (8.7e-04)	7.0e-01 (1.1e-01)
ENSMUSG00000032010	8.73962	0.00311369	0.202506	45.0568	1.6445e-10	1.42046e-08	20.9649	2.80234e-05	0.00151855	0.626661	0.428583	0.700485	0.583168	0.445073	0.719845	3.25592	0.0711659	0.219404	ubiquitin specific peptidase 2 [Source:MGI Symbol;Acc:MGI:1858178]	9	44067021	44095627	1	protein_coding	9	Usp2	817	1440	1454	1812	0.450883	0.794702	0.802428	0.79	0.56	0.8	0.57	ubiquitin specific peptidase 2	1.4e-08 ( 1.6e-10)	2.0e-01 (3.1e-03)	1.5e-03 (2.8e-05)	2.0e-01 (3.1e-03)
ENSMUSG00000002763	1.82765	0.176405	0.776795	45.0278	1.66856e-10	1.4324e-08	2.73379	0.254897	0.530134	5.90506	0.0150975	0.105945	5.21223	0.0224285	0.13955	18.6146	1.59991e-05	0.000429589	peroxisomal biogenesis factor 6 [Source:MGI Symbol;Acc:MGI:2385054]	17	46711463	46725541	1	protein_coding	4	Pex6	1608	1794	2392	2501	0.642943	0.717313	0.956417	0.72	0.67	0.96	0.9	peroxisomal biogenesis factor 6	1.4e-08 ( 1.7e-10)	7.8e-01 (1.8e-01)	5.3e-01 (2.5e-01)	7.8e-01 (1.8e-01)
ENSMUSG00000016256	7.62166	0.00576715	0.272523	44.853	1.82094e-10	1.54427e-08	18.4936	9.64185e-05	0.00367625	24.0269	9.49999e-07	0.000118923	22.3723	2.24587e-06	0.000244487	38.3305	5.97225e-10	7.48825e-08	cathepsin Z [Source:MGI Symbol;Acc:MGI:1891190]	2	174427493	174439039	-1	protein_coding	1	Ctsz	6429	10423	6123	5609	1.14619	1.85826	1.09164	1.86	1.05	1.09	0.62	cathepsin Z	1.5e-08 ( 1.8e-10)	2.7e-01 (5.8e-03)	3.7e-03 (9.6e-05)	2.7e-01 (5.8e-03)
ENSMUSG00000037408	18.6678	1.55588e-05	0.00857456	44.7648	1.90306e-10	1.60418e-08	19.3335	6.33566e-05	0.0028399	38.2685	6.16499e-10	2.27732e-07	34.6846	3.87692e-09	1.43273e-06	31.6252	1.86989e-08	1.52667e-06	cyclin M4 [Source:MGI Symbol;Acc:MGI:2151060]	1	36471620	36508764	1	protein_coding	2	Cnnm4	168	302	164	101	1.66337	2.9901	1.62376	2.99	1.02	1.62	0.56	cyclin M4	1.6e-08 ( 1.9e-10)	8.6e-03 (1.6e-05)	2.8e-03 (6.3e-05)	8.6e-03 (1.6e-05)
ENSMUSG00000025498	6.91909	0.00852804	0.313769	44.6869	1.97859e-10	1.65787e-08	9.59786	0.00823857	0.0752391	4.8855	0.0270832	0.150864	4.91433	0.0266347	0.15424	16.05	6.16913e-05	0.00125737	interferon regulatory factor 7 [Source:MGI Symbol;Acc:MGI:1859212]	7	141262706	141266481	-1	protein_coding	13	Irf7	612	647	1094	932	0.656652	0.694206	1.17382	0.69	0.56	1.17	0.95	interferon regulatory factor 7	1.7e-08 ( 2.0e-10)	3.1e-01 (8.5e-03)	7.5e-02 (8.2e-03)	3.1e-01 (8.5e-03)
ENSMUSG00000068739	5.63581	0.0175972	0.401077	44.41	2.27242e-10	1.89273e-08	8.2811	0.0159141	0.113719	34.921	3.43362e-09	1.05069e-06	34.092	5.25675e-09	1.89284e-06	39.8109	2.79776e-10	3.97125e-08	seryl-aminoacyl-tRNA synthetase [Source:MGI Symbol;Acc:MGI:102809]	3	108424865	108445209	-1	protein_coding	5	Sars	2051	2653	1730	1507	1.36098	1.76045	1.14798	1.76	1.19	1.15	0.77	seryl-aminoacyl-tRNA synthetase	1.9e-08 ( 2.3e-10)	4.0e-01 (1.8e-02)	1.1e-01 (1.6e-02)	4.0e-01 (1.8e-02)
ENSMUSG00000019055	3.79132	0.0515192	0.575728	44.2354	2.47979e-10	2.05323e-08	10.0698	0.00650698	0.0642117	13.8337	0.00019972	0.0061117	12.2149	0.000474088	0.0119526	24.1413	8.95189e-07	4.13094e-05	procollagen-lysine, 2-oxoglutarate 5-dioxygenase 1 [Source:MGI Symbol;Acc:MGI:99907]	4	147909753	147936767	-1	protein_coding	6	Plod1	1764	2355	1467	1376	1.28198	1.71148	1.06613	1.71	1.2	1.07	0.75	procollagen-lysine, 2-oxoglutarate 5-dioxygenase 1	2.1e-08 ( 2.5e-10)	5.8e-01 (5.2e-02)	6.4e-02 (6.5e-03)	5.8e-01 (5.2e-02)
ENSMUSG00000030541	2.26092	0.132675	0.746104	43.812	3.0644e-10	2.50761e-08	8.30878	0.0156954	0.112629	13.805	0.000202799	0.00612401	13.6039	0.000225712	0.00743072	23.6158	1.17619e-06	5.06563e-05	isocitrate dehydrogenase 2 (NADP+), mitochondrial [Source:MGI Symbol;Acc:MGI:96414]	7	80094846	80115392	-1	protein_coding	7	Idh2	3840	5197	3314	3099	1.23911	1.67699	1.06938	1.68	1.16	1.07	0.74	isocitrate dehydrogenase 2 (NADP+), mitochondrial	2.5e-08 ( 3.1e-10)	7.5e-01 (1.3e-01)	1.1e-01 (1.6e-02)	7.5e-01 (1.3e-01)
ENSMUSG00000046404	8.31617	0.00392937	0.226068	43.7667	3.13465e-10	2.55018e-08	8.46022	0.0145508	0.107389	17.2516	3.27417e-05	0.0017654	13.6828	0.000216426	0.00723636	21.5041	3.5308e-06	0.000126166	YOD1 deubiquitinase [Source:MGI Symbol;Acc:MGI:2442596]	1	130717327	130724358	1	protein_coding	1	Yod1	607	838	534	352	1.72443	2.38068	1.51705	2.38	1.14	1.52	0.72	YOD1 deubiquitinase	2.6e-08 ( 3.1e-10)	2.3e-01 (3.9e-03)	1.1e-01 (1.5e-02)	2.3e-01 (3.9e-03)
ENSMUSG00000022181	0.0405689	0.840372	0.980687	43.5699	3.45875e-10	2.79759e-08	0.322466	0.851094	0.932604	7.02309	0.00804651	0.0720668	6.59376	0.0102337	0.0880857	24.6994	6.70053e-07	3.22245e-05	complement component 6 [Source:MGI Symbol;Acc:MGI:88233]	15	4727175	4814967	1	protein_coding	5	C6	967	1004	3317	5442	0.177692	0.184491	0.609519	0.18	0.29	0.61	0.96	complement component 6	2.8e-08 ( 3.5e-10)	9.8e-01 (8.4e-01)	9.3e-01 (8.5e-01)	9.8e-01 (8.4e-01)
ENSMUSG00000022865	0.0810848	0.775833	0.972787	43.5493	3.49453e-10	2.81029e-08	8.11555	0.0172874	0.119409	2.91451	0.0877859	0.299879	2.48526	0.114917	0.358061	9.61535	0.00192958	0.0171997	coxsackie virus and adenovirus receptor [Source:MGI Symbol;Acc:MGI:1201679]	16	78301489	78359774	1	protein_coding	6	Cxadr	1631	1305	1142	885	1.84294	1.47458	1.2904	1.47	1.43	1.29	1.25	coxsackie virus and adenovirus receptor	2.8e-08 ( 3.5e-10)	9.7e-01 (7.8e-01)	1.2e-01 (1.7e-02)	9.7e-01 (7.8e-01)
ENSMUSG00000039982	1.36121e-05	0.997056	0.999474	43.1113	4.35011e-10	3.45858e-08	1.11418	0.572874	0.781388	6.04406	0.0139531	0.100937	5.60189	0.0179411	0.122637	22.003	2.72226e-06	0.000101672	deltex 4, E3 ubiquitin ligase [Source:MGI Symbol;Acc:MGI:2672905]	19	12466341	12501996	-1	protein_coding	1	Dtx4	333	267	202	108	3.08333	2.47222	1.87037	2.47	1.65	1.87	1.25	deltex 4, E3 ubiquitin ligase	3.5e-08 ( 4.4e-10)	1.0e+00 (1.0e+00)	7.8e-01 (5.7e-01)	1.0e+00 (1.0e+00)
ENSMUSG00000041959	5.67892	0.01717	0.401077	43.0611	4.46064e-10	3.51911e-08	5.93817	0.0513503	0.22449	0.471736	0.492189	0.747292	0.38312	0.535938	0.781941	4.31104	0.0378659	0.145287	S100 calcium binding protein A10 (calpactin) [Source:MGI Symbol;Acc:MGI:1339468]	3	93555080	93564643	1	protein_coding	3	S100a10	3619	2810	1935	1867	1.9384	1.50509	1.03642	1.51	1.87	1.04	1.29	S100 calcium binding protein A10 (calpactin)	3.5e-08 ( 4.5e-10)	4.0e-01 (1.7e-02)	2.2e-01 (5.1e-02)	4.0e-01 (1.7e-02)
ENSMUSG00000032437	0.211597	0.645519	0.948095	43.054	4.47653e-10	3.51911e-08	0.26619	0.875382	0.943918	6.54873	0.0104959	0.084569	5.63334	0.017622	0.121584	15.7078	7.39181e-05	0.00143375	STT3, subunit of the oligosaccharyltransferase complex, homolog B (S. cerevisiae) [Source:MGI Symbol;Acc:MGI:1915542]	9	115242581	115310421	-1	protein_coding	1	Stt3b	2425	2458	1810	1802	1.34573	1.36404	1.00444	1.36	1.34	1	0.99	STT3, subunit of the oligosaccharyltransferase complex, homolog B (S. cerevisiae)	3.5e-08 ( 4.5e-10)	9.5e-01 (6.5e-01)	9.4e-01 (8.8e-01)	9.5e-01 (6.5e-01)
ENSMUSG00000040713	7.21895	0.00721377	0.288951	43.0055	4.58633e-10	3.58528e-08	8.25545	0.0161195	0.114672	5.57243	0.0182454	0.118677	5.16517	0.0230442	0.141623	12.8175	0.000343391	0.00459261	cellular repressor of E1A-stimulated genes 1 [Source:MGI Symbol;Acc:MGI:1344382]	1	165763746	165775308	1	protein_coding	3	Creg1	20616	21605	15833	10551	1.95394	2.04767	1.50062	2.05	1.3	1.5	0.95	cellular repressor of E1A-stimulated genes 1	3.6e-08 ( 4.6e-10)	2.9e-01 (7.2e-03)	1.1e-01 (1.6e-02)	2.9e-01 (7.2e-03)
ENSMUSG00000007038	11.9861	0.00053599	0.0863439	42.8211	5.02947e-10	3.88826e-08	12.7604	0.00169475	0.0267538	16.722	4.32754e-05	0.00212065	13.9055	0.000192235	0.00673207	17.5485	2.80076e-05	0.000675328	neuraminidase 1 [Source:MGI Symbol;Acc:MGI:97305]	17	34931253	34935953	1	protein_coding	3	Neu1	1278	1574	1221	1043	1.22531	1.50911	1.17066	1.51	1.05	1.17	0.81	neuraminidase 1	3.9e-08 ( 5.0e-10)	8.6e-02 (5.4e-04)	2.7e-02 (1.7e-03)	8.6e-02 (5.4e-04)
ENSMUSG00000026170	0.0544016	0.815574	0.979456	42.8314	5.00347e-10	3.88826e-08	0.205248	0.902466	0.955886	7.83226	0.0051322	0.0536644	6.50559	0.0107536	0.090427	18.0186	2.18762e-05	0.000550552	cytochrome P450, family 27, subfamily a, polypeptide 1 [Source:MGI Symbol;Acc:MGI:88594]	1	74713574	74737892	1	protein_coding	3	Cyp27a1	11339	10553	16611	19349	0.586025	0.545403	0.858494	0.55	0.68	0.86	1.07	cytochrome P450, family 27, subfamily a, polypeptide 1	3.9e-08 ( 5.0e-10)	9.8e-01 (8.2e-01)	9.6e-01 (9.0e-01)	9.8e-01 (8.2e-01)
ENSMUSG00000057103	2.48266	0.115107	0.717387	42.7737	5.15013e-10	3.95508e-08	23.3546	8.48444e-06	0.000605729	11.2169	0.000810566	0.015945	11.7732	0.000600882	0.0139705	44.2691	2.86201e-11	5.82481e-09	N-acetyltransferase 8 (GCN5-related) family member 1 [Source:MGI Symbol;Acc:MGI:1913366]	6	85910154	85915687	-1	protein_coding	3	Nat8f1	4361	1877	6685	5090	0.856778	0.368762	1.31336	0.37	0.65	1.31	2.32	N-acetyltransferase 8 (GCN5-related) family member 1	4.0e-08 ( 5.2e-10)	7.2e-01 (1.2e-01)	6.1e-04 (8.5e-06)	7.2e-01 (1.2e-01)
ENSMUSG00000005233	1.32142	0.250337	0.833211	42.765	5.17244e-10	3.95508e-08	11.2167	0.00366717	0.0450524	7.95868	0.00478574	0.0515244	8.29432	0.00397693	0.0474495	37.2982	1.01376e-09	1.18635e-07	SPC25, NDC80 kinetochore complex component, homolog (S. cerevisiae) [Source:MGI Symbol;Acc:MGI:1913692]	2	69193895	69206194	-1	protein_coding	9	Spc25	67	39	147	128	0.523438	0.304688	1.14844	0.3	0.46	1.15	1.72	SPC25, NDC80 kinetochore complex component, homolog (S. cerevisiae)	4.0e-08 ( 5.2e-10)	8.3e-01 (2.5e-01)	4.5e-02 (3.7e-03)	8.3e-01 (2.5e-01)
ENSMUSG00000025220	15.6707	7.53843e-05	0.0249867	42.6551	5.46464e-10	4.13333e-08	16.8947	0.000214467	0.00653822	0.362803	0.546954	0.786832	0.418487	0.517693	0.770733	3.8415	0.0499988	0.174356	meningioma expressed antigen 5 (hyaluronidase) [Source:MGI Symbol;Acc:MGI:1932139]	19	45750261	45783520	-1	protein_coding	1	Mgea5	804	1088	1339	1165	0.690129	0.933906	1.14936	0.93	0.6	1.15	0.74	meningioma expressed antigen 5 (hyaluronidase)	4.1e-08 ( 5.5e-10)	2.5e-02 (7.5e-05)	6.5e-03 (2.1e-04)	2.5e-02 (7.5e-05)
ENSMUSG00000005949	0.77747	0.377916	0.888868	42.5618	5.72568e-10	4.3075e-08	19.5517	5.68076e-05	0.00260626	32.6244	1.11802e-08	2.79911e-06	32.185	1.4017e-08	4.27915e-06	32.4417	1.22823e-08	1.05171e-06	cystinosis, nephropathic [Source:MGI Symbol;Acc:MGI:1932872]	11	73183596	73199042	-1	protein_coding	5	Ctns	498	735	380	409	1.2176	1.79707	0.929095	1.8	1.31	0.93	0.68	cystinosis, nephropathic	4.3e-08 ( 5.7e-10)	8.9e-01 (3.8e-01)	2.6e-03 (5.7e-05)	8.9e-01 (3.8e-01)
ENSMUSG00000027829	0.386891	0.533938	0.932935	42.4558	6.03727e-10	4.49746e-08	32.6269	8.22556e-08	1.55541e-05	24.6784	6.774e-07	9.01561e-05	24.2333	8.53454e-07	0.000126159	29.5061	5.57397e-08	3.85593e-06	cyclin L1 [Source:MGI Symbol;Acc:MGI:1922664]	3	65946151	65958249	-1	protein_coding	14	Ccnl1	1080	1740	770	1040	1.03846	1.67308	0.740385	1.67	1.4	0.74	0.62	cyclin L1	4.5e-08 ( 6.0e-10)	9.3e-01 (5.3e-01)	1.6e-05 (8.2e-08)	9.3e-01 (5.3e-01)
ENSMUSG00000020653	7.58692	0.00587934	0.272534	42.4541	6.04247e-10	4.49746e-08	11.1415	0.00380753	0.0460655	23.7083	1.12098e-06	0.000135403	18.9689	1.32867e-05	0.000932928	25.6487	4.09574e-07	2.09151e-05	Kruppel-like factor 11 [Source:MGI Symbol;Acc:MGI:2653368]	12	24651274	24662789	1	protein_coding	4	Klf11	448	664	320	240	1.86667	2.76667	1.33333	2.77	1.4	1.33	0.67	Kruppel-like factor 11	4.5e-08 ( 6.0e-10)	2.7e-01 (5.9e-03)	4.6e-02 (3.8e-03)	2.7e-01 (5.9e-03)
ENSMUSG00000073987	2.46439	0.116453	0.718974	42.12	7.141e-10	5.28698e-08	3.17625	0.204308	0.471997	7.3604	0.00666758	0.064115	6.08349	0.0136451	0.104758	15.6634	7.56727e-05	0.00145971	gamma-glutamyl hydrolase [Source:MGI Symbol;Acc:MGI:1329035]	4	20042052	20066750	1	protein_coding	1	Ggh	457	527	357	281	1.62633	1.87544	1.27046	1.88	1.28	1.27	0.87	gamma-glutamyl hydrolase	5.3e-08 ( 7.1e-10)	7.2e-01 (1.2e-01)	4.7e-01 (2.0e-01)	7.2e-01 (1.2e-01)
ENSMUSG00000024424	2.34017	0.126076	0.736276	41.6376	9.08883e-10	6.69368e-08	9.36486	0.00925651	0.0804012	35.1936	2.98502e-09	9.55901e-07	37.5846	8.75345e-10	3.8414e-07	81.9931	1.3656e-19	1.74337e-16	tetratricopeptide repeat domain 39C [Source:MGI Symbol;Acc:MGI:1919997]	18	12599926	12737050	1	protein_coding	4	Ttc39c	6211	3572	7470	8042	0.77232	0.444168	0.928873	0.44	0.83	0.93	1.74	tetratricopeptide repeat domain 39C	6.7e-08 ( 9.1e-10)	7.4e-01 (1.3e-01)	8.0e-02 (9.3e-03)	7.4e-01 (1.3e-01)
ENSMUSG00000063354	0.784013	0.375917	0.888171	41.3948	1.02622e-09	7.51825e-08	1.50881	0.47029	0.715089	7.1791	0.00737576	0.0690913	3.16531	0.0752181	0.28175	19.8918	8.19526e-06	0.000253411	solute carrier family 39 (zinc transporter), member 4 [Source:MGI Symbol;Acc:MGI:1919277]	15	76612383	76617384	-1	protein_coding	4	Slc39a4	1253	1303	897	810	1.54691	1.60864	1.10741	1.61	1.4	1.11	0.96	solute carrier family 39 (zinc transporter), member 4	7.5e-08 ( 1.0e-09)	8.9e-01 (3.8e-01)	7.2e-01 (4.7e-01)	8.9e-01 (3.8e-01)
ENSMUSG00000022895	21.6021	3.35487e-06	0.00283709	41.3599	1.04426e-09	7.61058e-08	33.5729	5.12547e-08	1.05472e-05	73.8159	8.57544e-18	2.36167e-14	53.5977	2.46044e-13	3.8391e-10	23.6491	1.156e-06	5.0104e-05	E26 avian leukemia oncogene 2, 3' domain [Source:MGI Symbol;Acc:MGI:95456]	16	95702407	95721045	1	protein_coding	1	Ets2	519	1081	519	464	1.11853	2.32974	1.11853	2.33	1	1.12	0.48	E26 avian leukemia oncogene 2, 3' domain	7.6e-08 ( 1.0e-09)	2.8e-03 (3.4e-06)	1.1e-05 (5.1e-08)	2.8e-03 (3.4e-06)
ENSMUSG00000010095	5.81775	0.0158652	0.389684	41.2	1.13118e-09	8.20132e-08	6.74483	0.0343066	0.17636	26.3217	2.8903e-07	4.52266e-05	21.7072	3.17592e-06	0.000316308	52.5618	4.16924e-13	1.30108e-10	solute carrier family 3 (activators of dibasic and neutral amino acid transport), member 2 [Source:MGI Symbol;Acc:MGI:96955]	19	8706882	8723369	-1	protein_coding	9	Slc3a2	1329	1610	1117	969	1.37152	1.66151	1.15273	1.66	1.19	1.15	0.83	solute carrier family 3 (activators of dibasic and neutral amino acid transport), member 2	8.2e-08 ( 1.1e-09)	3.9e-01 (1.6e-02)	1.8e-01 (3.4e-02)	3.9e-01 (1.6e-02)
ENSMUSG00000028059	8.99012	0.00271443	0.192046	41.1636	1.15194e-09	8.30879e-08	15.1671	0.000508746	0.0117135	81.6341	1.63762e-19	5.63752e-16	84.4919	3.85793e-20	1.35442e-16	106.82	4.87459e-25	1.36908e-21	rho/rac guanine nucleotide exchange factor (GEF) 2 [Source:MGI Symbol;Acc:MGI:103264]	3	88605966	88648052	1	protein_coding	32	Arhgef2	132	385	113	106	1.24528	3.63208	1.06604	3.63	1.17	1.07	0.34	rho/rac guanine nucleotide exchange factor (GEF) 2	8.3e-08 ( 1.2e-09)	1.9e-01 (2.7e-03)	1.2e-02 (5.1e-04)	1.9e-01 (2.7e-03)
ENSMUSG00000010067	15.2284	9.52598e-05	0.0293372	41.1411	1.16501e-09	8.35997e-08	28.8959	5.31295e-07	6.88372e-05	68.4522	1.29991e-16	2.9833e-13	60.1922	8.60319e-15	2.01358e-11	29.9588	4.41325e-08	3.22788e-06	Ras association (RalGDS/AF-6) domain family member 1 [Source:MGI Symbol;Acc:MGI:1928386]	9	107551555	107562267	1	protein_coding	10	Rassf1	263	476	263	210	1.25238	2.26667	1.25238	2.27	1	1.25	0.55	Ras association (RalGDS/AF-6) domain family member 1	8.4e-08 ( 1.2e-09)	2.9e-02 (9.5e-05)	6.9e-05 (5.3e-07)	2.9e-02 (9.5e-05)
ENSMUSG00000048490	3.87143	0.0491145	0.57142	41.1086	1.18407e-09	8.4534e-08	7.11062	0.0285726	0.160474	16.2892	5.4373e-05	0.00247919	13.2124	0.000278105	0.00856454	23.9089	1.01003e-06	4.50282e-05	nuclear receptor interacting protein 1 [Source:MGI Symbol;Acc:MGI:1315213]	16	76287400	76373827	-1	protein_coding	8	Nrip1	252	350	192	165	1.52727	2.12121	1.16364	2.12	1.31	1.16	0.72	nuclear receptor interacting protein 1	8.5e-08 ( 1.2e-09)	5.7e-01 (4.9e-02)	1.6e-01 (2.9e-02)	5.7e-01 (4.9e-02)
ENSMUSG00000033326	5.58386	0.0181267	0.405657	41.0266	1.23366e-09	8.76272e-08	12.5514	0.00188143	0.0285541	28.94	7.46571e-08	1.4899e-05	24.706	6.67763e-07	0.000106561	28.454	9.59491e-08	6.06943e-06	lysine (K)-specific demethylase 4A [Source:MGI Symbol;Acc:MGI:2446210]	4	118136957	118180043	-1	protein_coding	6	Kdm4a	766	1187	642	549	1.39526	2.16211	1.1694	2.16	1.19	1.17	0.65	lysine (K)-specific demethylase 4A	8.8e-08 ( 1.2e-09)	4.1e-01 (1.8e-02)	2.9e-02 (1.9e-03)	4.1e-01 (1.8e-02)
ENSMUSG00000042797	0.78835	0.3746	0.888171	40.9741	1.26642e-09	8.95e-08	5.69092	0.0581076	0.240562	12.0248	0.000524976	0.0118765	13.0401	0.000304895	0.00897207	34.9534	3.37698e-09	3.41172e-07	aquaporin 11 [Source:MGI Symbol;Acc:MGI:1913583]	7	97724006	97738289	-1	protein_coding	5	Aqp11	753	661	1161	1163	0.647463	0.568358	0.99828	0.57	0.65	1	1.14	aquaporin 11	8.9e-08 ( 1.3e-09)	8.9e-01 (3.7e-01)	2.4e-01 (5.8e-02)	8.9e-01 (3.7e-01)
ENSMUSG00000037405	4.64394	0.0311634	0.493664	40.83	1.36103e-09	9.52246e-08	15.2191	0.000495703	0.0115222	24.205	8.6605e-07	0.000110421	20.558	5.78504e-06	0.000495362	32.7623	1.04145e-08	9.14071e-07	intercellular adhesion molecule 1 [Source:MGI Symbol;Acc:MGI:96392]	9	21015985	21028817	1	protein_coding	2	Icam1	306	506	228	210	1.45714	2.40952	1.08571	2.41	1.34	1.09	0.6	intercellular adhesion molecule 1	9.5e-08 ( 1.4e-09)	4.9e-01 (3.1e-02)	1.2e-02 (5.0e-04)	4.9e-01 (3.1e-02)
ENSMUSG00000020432	3.0938	0.078591	0.638918	40.8356	1.35723e-09	9.52246e-08	13.6446	0.00108922	0.0198975	15.0311	0.000105755	0.00388333	13.6251	0.00022318	0.00740924	20.7428	5.25273e-06	0.000175629	transcobalamin 2 [Source:MGI Symbol;Acc:MGI:98534]	11	3917192	3932159	-1	protein_coding	7	Tcn2	3118	4214	2425	2671	1.16735	1.57769	0.9079	1.58	1.29	0.91	0.74	transcobalamin 2	9.5e-08 ( 1.4e-09)	6.4e-01 (7.9e-02)	2.0e-02 (1.1e-03)	6.4e-01 (7.9e-02)
ENSMUSG00000037820	1.55629	0.212209	0.807135	40.7971	1.38363e-09	9.63238e-08	1.79501	0.407586	0.671029	8.76276	0.00307443	0.0381282	7.63097	0.00573743	0.0608081	18.0964	2.1e-05	0.000539129	transglutaminase 2, C polypeptide [Source:MGI Symbol;Acc:MGI:98731]	2	158116402	158146436	-1	protein_coding	4	Tgm2	2501	2798	1674	1351	1.85122	2.07106	1.23908	2.07	1.49	1.24	0.89	transglutaminase 2, C polypeptide	9.6e-08 ( 1.4e-09)	8.1e-01 (2.1e-01)	6.7e-01 (4.1e-01)	8.1e-01 (2.1e-01)
ENSMUSG00000020142	0.00364496	0.951858	0.993697	40.7341	1.42795e-09	9.89171e-08	0.127477	0.93825	0.973131	4.5944	0.0320766	0.16769	4.32657	0.0375218	0.188252	22.5176	2.08227e-06	8.12258e-05	solute carrier family 1 (glutamate/neutral amino acid transporter), member 4 [Source:MGI Symbol;Acc:MGI:2135601]	11	20302180	20332713	-1	protein_coding	2	Slc1a4	165	177	58	47	3.51064	3.76596	1.23404	3.77	2.84	1.23	0.93	solute carrier family 1 (glutamate/neutral amino acid transporter), member 4	9.9e-08 ( 1.4e-09)	9.9e-01 (9.5e-01)	9.7e-01 (9.4e-01)	9.9e-01 (9.5e-01)
ENSMUSG00000030499	2.72961	0.0985032	0.687618	40.6596	1.48212e-09	1.02164e-07	25.9544	2.31247e-06	0.000215722	32.2082	1.38505e-08	3.23258e-06	33.5363	6.99478e-09	2.3958e-06	41.0317	1.49783e-10	2.4177e-08	potassium channel tetramerisation domain containing 15 [Source:MGI Symbol;Acc:MGI:2385276]	7	34639014	34656732	-1	protein_coding	8	Kctd15	346	614	285	339	1.02065	1.81121	0.840708	1.81	1.21	0.84	0.56	potassium channel tetramerisation domain containing 15	1.0e-07 ( 1.5e-09)	6.9e-01 (9.9e-02)	2.2e-04 (2.3e-06)	6.9e-01 (9.9e-02)
ENSMUSG00000030827	2.30793	0.128716	0.743395	40.6218	1.51037e-09	1.03601e-07	2.51221	0.284761	0.562409	2.11164	0.146183	0.403394	1.84547	0.174312	0.45164	14.4241	0.000145926	0.00242598	fibroblast growth factor 21 [Source:MGI Symbol;Acc:MGI:1861377]	7	45613886	45615490	-1	protein_coding	1	Fgf21	1768	1067	93	104	17	10.2596	0.894231	10.26	19.01	0.89	1.66	fibroblast growth factor 21	1.0e-07 ( 1.5e-09)	7.4e-01 (1.3e-01)	5.6e-01 (2.8e-01)	7.4e-01 (1.3e-01)
ENSMUSG00000038745	1.95158	0.162417	0.769852	40.3283	1.74913e-09	1.19393e-07	10.616	0.00495187	0.054662	5.05583	0.0245433	0.142021	4.14929	0.0416519	0.199735	12.6316	0.000379276	0.00495458	NLR family, pyrin domain containing 6 [Source:MGI Symbol;Acc:MGI:2141990]	7	140920902	140929192	1	protein_coding	4	Nlrp6	2652	2874	3106	4499	0.589464	0.638809	0.690376	0.64	0.85	0.69	0.92	NLR family, pyrin domain containing 6	1.2e-07 ( 1.7e-09)	7.7e-01 (1.6e-01)	5.5e-02 (5.0e-03)	7.7e-01 (1.6e-01)
ENSMUSG00000066153	6.82756	0.00897616	0.317789	40.3025	1.77184e-09	1.19775e-07	13.4005	0.00123061	0.0214921	9.5604	0.0019882	0.0290631	9.28868	0.00230574	0.0339764	23.4469	1.28411e-06	5.40148e-05	major urinary protein 21 [Source:MGI Symbol;Acc:MGI:3650630]	4	62147932	62150863	-1	protein_coding	1	Mup21	1545	111	2336	5891	0.262264	0.0188423	0.396537	0.02	0.66	0.4	13.92	major urinary protein 21	1.2e-07 ( 1.8e-09)	3.2e-01 (9.0e-03)	2.1e-02 (1.2e-03)	3.2e-01 (9.0e-03)
ENSMUSG00000024335	1.52357	0.21708	0.810105	40.2707	1.80027e-09	1.21112e-07	1.70083	0.427239	0.684749	9.5646	0.00198365	0.0290276	8.4197	0.00371177	0.0456467	17.747	2.52309e-05	0.000619539	bromodomain containing 2 [Source:MGI Symbol;Acc:MGI:99495]	17	34112023	34122634	-1	protein_coding	13	Brd2	2561	2801	2129	1808	1.41648	1.54923	1.17754	1.55	1.2	1.18	0.91	bromodomain containing 2	1.2e-07 ( 1.8e-09)	8.1e-01 (2.2e-01)	6.8e-01 (4.3e-01)	8.1e-01 (2.2e-01)
ENSMUSG00000025271	3.12674	0.0770174	0.636423	40.1224	1.93883e-09	1.2919e-07	3.39357	0.183271	0.448817	32.8191	1.01145e-08	2.60377e-06	30.6878	3.03063e-08	8.34493e-06	40.6702	1.80215e-10	2.78105e-08	6-phosphofructo-2-kinase/fructose-2,6-biphosphatase 1 [Source:MGI Symbol;Acc:MGI:107816]	X	150588229	150643878	1	protein_coding	7	Pfkfb1	977	827	1240	1606	0.608344	0.514944	0.772105	0.51	0.79	0.77	1.18	6-phosphofructo-2-kinase/fructose-2,6-biphosphatase 1	1.3e-07 ( 1.9e-09)	6.4e-01 (7.7e-02)	4.5e-01 (1.8e-01)	6.4e-01 (7.7e-02)
ENSMUSG00000024197	1.1287	0.288053	0.853437	40.0893	1.97117e-09	1.30723e-07	1.15741	0.560623	0.774336	8.70202	0.00317858	0.0391144	7.88363	0.00498843	0.0549432	19.2363	1.15495e-05	0.000327655	perilipin 3 [Source:MGI Symbol;Acc:MGI:1914155]	17	56278962	56290511	-1	protein_coding	1	Plin3	1577	1662	1164	954	1.65304	1.74214	1.22013	1.74	1.35	1.22	0.95	perilipin 3	1.3e-07 ( 2.0e-09)	8.5e-01 (2.9e-01)	7.7e-01 (5.6e-01)	8.5e-01 (2.9e-01)
ENSMUSG00000048546	0.0593774	0.807483	0.979456	39.976	2.08605e-09	1.37689e-07	5.01934	0.0812949	0.29101	13.8768	0.000195194	0.00604005	11.7504	0.000608318	0.0140967	28.7858	8.08421e-08	5.25586e-06	transducer of ERBB2, 2 [Source:MGI Symbol;Acc:MGI:1888525]	15	81848272	81858796	-1	protein_coding	4	Tob2	2189	2604	1256	1367	1.60132	1.9049	0.9188	1.9	1.74	0.92	0.84	transducer of ERBB2, 2	1.4e-07 ( 2.1e-09)	9.8e-01 (8.1e-01)	2.9e-01 (8.1e-02)	9.8e-01 (8.1e-01)
ENSMUSG00000022025	0.239851	0.624314	0.946136	39.8093	2.26741e-09	1.48261e-07	13.0021	0.00150184	0.0246368	17.288	3.21214e-05	0.0017552	18.6744	1.55051e-05	0.00104181	49.0693	2.47079e-12	7.08107e-10	chondromodulin [Source:MGI Symbol;Acc:MGI:1341171]	14	79637690	79662170	-1	protein_coding	5	Cnmd	153	74	207	180	0.85	0.411111	1.15	0.41	0.74	1.15	2.07	chondromodulin	1.5e-07 ( 2.3e-09)	9.5e-01 (6.2e-01)	2.5e-02 (1.5e-03)	9.5e-01 (6.2e-01)
ENSMUSG00000005125	0.00879755	0.925272	0.989936	39.8109	2.26553e-09	1.48261e-07	0.00921255	0.995404	0.997543	5.06159	0.0244618	0.141903	4.31539	0.0377692	0.188685	41.1474	1.41168e-10	2.33226e-08	N-myc downstream regulated gene 1 [Source:MGI Symbol;Acc:MGI:1341799]	15	66929318	66969640	-1	protein_coding	13	Ndrg1	722	771	498	366	1.97268	2.10656	1.36066	2.11	1.45	1.36	0.94	N-myc downstream regulated gene 1	1.5e-07 ( 2.3e-09)	9.9e-01 (9.3e-01)	1.0e+00 (1.0e+00)	9.9e-01 (9.3e-01)
ENSMUSG00000000552	0.196499	0.657561	0.949569	39.617	2.49619e-09	1.62461e-07	2.0422	0.360199	0.632881	7.69721	0.00553061	0.0563109	7.28671	0.00694665	0.0691366	34.1166	5.19058e-09	5.02699e-07	zinc finger protein 385A [Source:MGI Symbol;Acc:MGI:1352495]	15	103313895	103340093	-1	protein_coding	3	Zfp385a	461	572	260	288	1.60069	1.98611	0.902778	1.99	1.77	0.9	0.81	zinc finger protein 385A	1.6e-07 ( 2.5e-09)	9.5e-01 (6.6e-01)	6.3e-01 (3.6e-01)	9.5e-01 (6.6e-01)
ENSMUSG00000007656	0.487595	0.485002	0.918994	39.582	2.54024e-09	1.64563e-07	1.2406	0.537783	0.759201	5.67032	0.0172543	0.11489	5.44492	0.0196253	0.128724	24.0749	9.26582e-07	4.25229e-05	cAMP-regulated phosphoprotein 19 [Source:MGI Symbol;Acc:MGI:1891691]	9	75037614	75060313	1	protein_coding	11	Arpp19	2514	2375	1867	1469	1.71137	1.61675	1.27093	1.62	1.35	1.27	1.06	cAMP-regulated phosphoprotein 19	1.6e-07 ( 2.5e-09)	9.2e-01 (4.9e-01)	7.6e-01 (5.4e-01)	9.2e-01 (4.9e-01)
ENSMUSG00000028766	0.151775	0.696845	0.95807	39.524	2.61497e-09	1.68505e-07	26.6706	1.61638e-06	0.00016654	11.5483	0.000678122	0.0142968	13.3328	0.000260802	0.00810815	14.1396	0.000169735	0.00271171	alkaline phosphatase, liver/bone/kidney [Source:MGI Symbol;Acc:MGI:87983]	4	137741733	137796384	-1	protein_coding	8	Alpl	787	1193	494	613	1.28385	1.94617	0.805873	1.95	1.59	0.81	0.66	alkaline phosphatase, liver/bone/kidney	1.7e-07 ( 2.6e-09)	9.6e-01 (7.0e-01)	1.7e-04 (1.6e-06)	9.6e-01 (7.0e-01)
ENSMUSG00000042675	1.07089	0.300744	0.860128	39.5162	2.62517e-09	1.68505e-07	4.38974	0.111373	0.345828	5.27932	0.0215802	0.131288	5.54553	0.0185279	0.12497	17.9042	2.32313e-05	0.000576391	yippee like 3 [Source:MGI Symbol;Acc:MGI:1913340]	7	126776955	126780514	1	protein_coding	11	Ypel3	1088	946	1517	1524	0.713911	0.620735	0.995407	0.62	0.72	1	1.15	yippee like 3	1.7e-07 ( 2.6e-09)	8.6e-01 (3.0e-01)	3.5e-01 (1.1e-01)	8.6e-01 (3.0e-01)
ENSMUSG00000020300	0.126243	0.722359	0.963336	39.3915	2.79407e-09	1.78527e-07	3.56356	0.168338	0.429002	12.0887	0.000507284	0.0115651	10.9983	0.00091196	0.0184534	25.8968	3.60162e-07	1.88722e-05	cytoplasmic polyadenylation element binding protein 4 [Source:MGI Symbol;Acc:MGI:1914829]	11	31872211	31935634	1	protein_coding	3	Cpeb4	693	904	476	460	1.50652	1.96522	1.03478	1.97	1.46	1.03	0.77	cytoplasmic polyadenylation element binding protein 4	1.8e-07 ( 2.8e-09)	9.6e-01 (7.2e-01)	4.3e-01 (1.7e-01)	9.6e-01 (7.2e-01)
ENSMUSG00000026074	0.820291	0.365095	0.887298	39.3742	2.81837e-09	1.79261e-07	1.94592	0.377963	0.64632	17.2264	3.318e-05	0.0017654	15.9215	6.60228e-05	0.00319951	71.7487	2.44425e-17	1.90692e-14	mitogen-activated protein kinase kinase kinase kinase 4 [Source:MGI Symbol;Acc:MGI:1349394]	1	39900913	40026310	1	protein_coding	18	Map4k4	350	497	246	174	2.01149	2.85632	1.41379	2.86	1.42	1.41	0.7	mitogen-activated protein kinase kinase kinase kinase 4	1.8e-07 ( 2.8e-09)	8.9e-01 (3.7e-01)	6.5e-01 (3.8e-01)	8.9e-01 (3.7e-01)
ENSMUSG00000003849	0.803465	0.370059	0.887872	39.359	2.83993e-09	1.79815e-07	1.09617	0.578057	0.784249	3.79932	0.0512734	0.218855	2.92814	0.0870476	0.307282	14.727	0.000124255	0.00215176	NAD(P)H dehydrogenase, quinone 1 [Source:MGI Symbol;Acc:MGI:103187]	8	107388225	107403206	-1	protein_coding	1	Nqo1	538	697	275	116	4.63793	6.00862	2.37069	6.01	1.96	2.37	0.77	NAD(P)H dehydrogenase, quinone 1	1.8e-07 ( 2.8e-09)	8.9e-01 (3.7e-01)	7.8e-01 (5.8e-01)	8.9e-01 (3.7e-01)
ENSMUSG00000020737	0.846245	0.357617	0.882686	39.2603	2.98348e-09	1.88054e-07	4.393	0.111192	0.345449	2.92095	0.0874366	0.299131	2.40882	0.120654	0.367579	13.6431	0.000221053	0.00329619	Jupiter microtubule associated homolog 1 [Source:MGI Symbol;Acc:MGI:1096361]	11	115497353	115514387	-1	protein_coding	5	Jpt1	348	339	250	202	1.72277	1.67822	1.23762	1.68	1.39	1.24	1.03	Jupiter microtubule associated homolog 1	1.9e-07 ( 3.0e-09)	8.8e-01 (3.6e-01)	3.5e-01 (1.1e-01)	8.8e-01 (3.6e-01)
ENSMUSG00000032051	0.640444	0.42355	0.905798	39.2117	3.05701e-09	1.90119e-07	5.16562	0.0755612	0.281055	18.0092	2.19842e-05	0.00131048	16.758	4.24623e-05	0.00225871	40.8155	1.673e-10	2.64456e-08	ferredoxin 1 [Source:MGI Symbol;Acc:MGI:103224]	9	51943306	51963556	-1	protein_coding	3	Fdx1	2841	2003	3765	3647	0.778996	0.549219	1.03236	0.55	0.75	1.03	1.42	ferredoxin 1	1.9e-07 ( 3.1e-09)	9.1e-01 (4.2e-01)	2.8e-01 (7.6e-02)	9.1e-01 (4.2e-01)
ENSMUSG00000028467	0.257263	0.612007	0.94532	39.2141	3.05324e-09	1.90119e-07	0.500223	0.778714	0.897744	8.94937	0.00277566	0.0356537	7.86416	0.00504244	0.0552389	23.5135	1.2404e-06	5.24668e-05	glucosidase beta 2 [Source:MGI Symbol;Acc:MGI:2654325]	4	43566928	43578873	-1	protein_coding	7	Gba2	186	192	256	351	0.529915	0.547009	0.729345	0.55	0.73	0.73	0.97	glucosidase beta 2	1.9e-07 ( 3.1e-09)	9.5e-01 (6.1e-01)	9.0e-01 (7.8e-01)	9.5e-01 (6.1e-01)
ENSMUSG00000024900	0.87494	0.349591	0.880792	39.1643	3.1302e-09	1.93809e-07	9.07502	0.0107	0.0880735	2.11528	0.145836	0.40284	2.09612	0.147673	0.411627	10.4042	0.00125729	0.0124514	carnitine palmitoyltransferase 1a, liver [Source:MGI Symbol;Acc:MGI:1098296]	19	3323301	3385732	1	protein_coding	1	Cpt1a	5992	6979	8346	10754	0.557188	0.648968	0.776083	0.65	0.72	0.78	0.86	carnitine palmitoyltransferase 1a, liver	1.9e-07 ( 3.1e-09)	8.8e-01 (3.5e-01)	8.8e-02 (1.1e-02)	8.8e-01 (3.5e-01)
ENSMUSG00000004098	11.6509	0.000641721	0.0933258	39.1019	3.22941e-09	1.99071e-07	13.5705	0.00113032	0.0204085	9.48756	0.0020687	0.0297349	7.23003	0.00716942	0.0703565	15.2657	9.33953e-05	0.00172572	collagen, type V, alpha 3 [Source:MGI Symbol;Acc:MGI:1858212]	9	20770050	20815067	-1	protein_coding	2	Col5a3	718	563	718	1304	0.550613	0.431748	0.550613	0.43	1	0.55	1.28	collagen, type V, alpha 3	2.0e-07 ( 3.2e-09)	9.3e-02 (6.4e-04)	2.0e-02 (1.1e-03)	9.3e-02 (6.4e-04)
ENSMUSG00000021360	0.704262	0.401355	0.897289	39.0559	3.30462e-09	2.02814e-07	6.19468	0.0451693	0.208186	29.7851	4.82699e-08	1.03856e-05	25.904	3.58829e-07	6.2988e-05	34.6571	3.93193e-09	3.91603e-07	glucosaminyl (N-acetyl) transferase 2, I-branching enzyme [Source:MGI Symbol;Acc:MGI:1100870]	13	40859754	40960892	1	protein_coding	6	Gcnt2	655	870	468	490	1.33673	1.77551	0.955102	1.78	1.4	0.96	0.75	glucosaminyl (N-acetyl) transferase 2, I-branching enzyme	2.0e-07 ( 3.3e-09)	9.0e-01 (4.0e-01)	2.1e-01 (4.5e-02)	9.0e-01 (4.0e-01)
ENSMUSG00000023073	0.00642916	0.936092	0.993422	38.8941	3.58305e-09	2.18942e-07	0.0808496	0.960381	0.982766	10.9127	0.000955078	0.0176766	11.6646	0.000637007	0.0145455	59.0808	1.51331e-14	7.08381e-12	solute carrier family 10, member 2 [Source:MGI Symbol;Acc:MGI:1201406]	8	5083219	5105351	-1	protein_coding	1	Slc10a2	459	302	1067	1317	0.348519	0.229309	0.810175	0.23	0.43	0.81	1.52	solute carrier family 10, member 2	2.2e-07 ( 3.6e-09)	9.9e-01 (9.4e-01)	9.8e-01 (9.6e-01)	9.9e-01 (9.4e-01)
ENSMUSG00000021770	6.17733	0.0129397	0.363249	38.8305	3.69887e-09	2.25036e-07	6.25086	0.0439179	0.205157	17.0196	3.69954e-05	0.00187289	13.6168	0.000224165	0.00742439	38.0278	6.97452e-10	8.66754e-08	sterile alpha motif domain containing 8 [Source:MGI Symbol;Acc:MGI:1914880]	14	21750531	21798726	1	protein_coding	4	Samd8	746	929	674	500	1.492	1.858	1.348	1.86	1.11	1.35	0.8	sterile alpha motif domain containing 8	2.3e-07 ( 3.7e-09)	3.6e-01 (1.3e-02)	2.1e-01 (4.4e-02)	3.6e-01 (1.3e-02)
ENSMUSG00000020258	6.08841	0.0136071	0.372662	38.7412	3.86769e-09	2.34288e-07	11.4353	0.0032874	0.0418085	33.7402	6.29847e-09	1.77e-06	29.8377	4.69769e-08	1.17803e-05	47.2899	6.12256e-12	1.53534e-09	glycerate kinase [Source:MGI Symbol;Acc:MGI:2444085]	9	106152857	106158138	-1	protein_coding	5	Glyctk	4725	3351	5021	5957	0.793184	0.562531	0.842874	0.56	0.94	0.84	1.41	glycerate kinase	2.3e-07 ( 3.9e-09)	3.7e-01 (1.4e-02)	4.2e-02 (3.3e-03)	3.7e-01 (1.4e-02)
ENSMUSG00000039782	4.33895	0.03725	0.524277	38.539	4.27927e-09	2.56995e-07	7.06122	0.0292871	0.162668	6.45096	0.0110893	0.0878642	4.53287	0.0332498	0.17501	16.7721	4.21478e-05	0.000936522	cytoplasmic polyadenylation element binding protein 2 [Source:MGI Symbol;Acc:MGI:2442640]	5	43233170	43289724	1	protein_coding	7	Cpeb2	852	910	708	519	1.64162	1.75337	1.36416	1.75	1.2	1.36	0.94	cytoplasmic polyadenylation element binding protein 2	2.6e-07 ( 4.3e-09)	5.2e-01 (3.7e-02)	1.6e-01 (2.9e-02)	5.2e-01 (3.7e-02)
ENSMUSG00000078597	3.7204	0.0537515	0.586284	38.4972	4.36957e-09	2.61297e-07	4.9792	0.0829432	0.294734	9.44921	0.0021124	0.0302053	8.4513	0.00364782	0.0453233	20.8684	4.91936e-06	0.000168084	cytochrome P450, family 4, subfamily a, polypeptide 12B [Source:MGI Symbol;Acc:MGI:3611747]	4	115411624	115439034	1	protein_coding	1	Cyp4a12b	338	162	938	1932	0.174948	0.0838509	0.485507	0.08	0.36	0.49	2.09	cytochrome P450, family 4, subfamily a, polypeptide 12B	2.6e-07 ( 4.4e-09)	5.9e-01 (5.4e-02)	2.9e-01 (8.3e-02)	5.9e-01 (5.4e-02)
ENSMUSG00000023175	1.13853	0.285964	0.852446	38.4214	4.53845e-09	2.7024e-07	2.49307	0.2875	0.566305	8.20842	0.00416965	0.0469853	7.28343	0.00695936	0.0691472	18.586	1.62405e-05	0.00043441	basigin [Source:MGI Symbol;Acc:MGI:88208]	10	79704491	79711969	1	protein_coding	6	Bsg	13764	15849	10668	9457	1.45543	1.6759	1.12805	1.68	1.29	1.13	0.87	basigin	2.7e-07 ( 4.5e-09)	8.5e-01 (2.9e-01)	5.7e-01 (2.9e-01)	8.5e-01 (2.9e-01)
ENSMUSG00000020265	0.046548	0.829183	0.980048	38.4067	4.57184e-09	2.71075e-07	6.64385	0.0360833	0.182877	2.59868	0.106953	0.336264	2.27199	0.131731	0.385024	10.6751	0.00108589	0.0111321	small ubiquitin-like modifier 3 [Source:MGI Symbol;Acc:MGI:1336201]	10	77606097	77618331	1	protein_coding	8	Sumo3	2579	2121	1942	1471	1.75323	1.44188	1.32019	1.44	1.33	1.32	1.22	small ubiquitin-like modifier 3	2.7e-07 ( 4.6e-09)	9.8e-01 (8.3e-01)	1.8e-01 (3.6e-02)	9.8e-01 (8.3e-01)
ENSMUSG00000042293	13.381	0.000254182	0.0544417	38.3562	4.68879e-09	2.76837e-07	13.782	0.00101688	0.0188967	18.7406	1.49756e-05	0.000972707	15.1157	0.000101117	0.00423159	21.3301	3.86611e-06	0.000136755	predicted gene 5617 [Source:MGI Symbol;Acc:MGI:3643566]	9	48495442	48495972	1	protein_coding	1	Gm5617	344	219	350	505	0.681188	0.433663	0.693069	0.43	0.98	0.69	1.57	predicted gene 5617	2.8e-07 ( 4.7e-09)	5.4e-02 (2.5e-04)	1.9e-02 (1.0e-03)	5.4e-02 (2.5e-04)
ENSMUSG00000021871	0.356826	0.550274	0.935223	38.3341	4.74083e-09	2.78733e-07	0.803379	0.669189	0.838597	4.77006	0.0289588	0.156746	3.58912	0.0581589	0.243318	16.634	4.53321e-05	0.000988507	predicted gene, 49342 [Source:MGI Symbol;Acc:MGI:6121535]	14	50944517	50963136	1	protein_coding	1	Gm49342	632	692	329	308	2.05195	2.24675	1.06818	2.25	1.92	1.07	0.91	predicted gene, 49342	2.8e-07 ( 4.7e-09)	9.4e-01 (5.5e-01)	8.4e-01 (6.7e-01)	9.4e-01 (5.5e-01)
ENSMUSG00000024421	1.62639	0.202203	0.801389	38.2241	5.00879e-09	2.93255e-07	8.53583	0.014011	0.10552	21.1898	4.15974e-06	0.000360833	21.5093	3.52111e-06	0.000338678	40.4036	2.06558e-10	3.08039e-08	laminin, alpha 3 [Source:MGI Symbol;Acc:MGI:99909]	18	12333819	12583013	1	protein_coding	2	Lama3	65	28	117	142	0.457746	0.197183	0.823944	0.2	0.56	0.82	2.32	laminin, alpha 3	2.9e-07 ( 5.0e-09)	8.0e-01 (2.0e-01)	1.1e-01 (1.4e-02)	8.0e-01 (2.0e-01)
ENSMUSG00000032245	6.19011	0.0128466	0.361605	38.1842	5.10994e-09	2.97931e-07	15.1596	0.000510653	0.0117333	33.4709	7.2338e-09	1.99219e-06	32.3468	1.28971e-08	4.11421e-06	40.3864	2.08386e-10	3.08039e-08	ceroid-lipofuscinosis, neuronal 6 [Source:MGI Symbol;Acc:MGI:2159324]	9	62838785	62852006	1	protein_coding	4	Cln6	230	519	179	159	1.44654	3.26415	1.12579	3.26	1.28	1.13	0.44	ceroid-lipofuscinosis, neuronal 6	3.0e-07 ( 5.1e-09)	3.6e-01 (1.3e-02)	1.2e-02 (5.1e-04)	3.6e-01 (1.3e-02)
ENSMUSG00000050708	4.53514	0.0332057	0.503908	38.1101	5.30261e-09	3.07877e-07	6.54504	0.0379108	0.188116	10.9781	0.000921945	0.0172724	10.827	0.00100032	0.0196744	23.446	1.28469e-06	5.40148e-05	ferritin light polypeptide 1 [Source:MGI Symbol;Acc:MGI:95589]	7	45457944	45459884	-1	protein_coding	6	Ftl1	156514	185942	128176	117070	1.33693	1.5883	1.09487	1.59	1.22	1.09	0.84	ferritin light polypeptide 1	3.1e-07 ( 5.3e-09)	5.0e-01 (3.3e-02)	1.9e-01 (3.8e-02)	5.0e-01 (3.3e-02)
ENSMUSG00000063232	2.71758	0.0992483	0.689731	38.1019	5.32454e-09	3.07877e-07	3.60257	0.165087	0.424254	11.2699	0.000787729	0.0156523	11.194	0.000820606	0.0171997	28.7613	8.18697e-08	5.29814e-06	serine (or cysteine) peptidase inhibitor, clade A (alpha-1 antiproteinase, antitrypsin), member 11 [Source:MGI Symbol;Acc:MGI:2685741]	12	103980243	103989957	-1	protein_coding	5	Serpina11	1391	1252	1953	2051	0.678206	0.610434	0.952218	0.61	0.71	0.95	1.11	serine (or cysteine) peptidase inhibitor, clade A (alpha-1 antiproteinase, antitrypsin), member 11	3.1e-07 ( 5.3e-09)	6.9e-01 (9.9e-02)	4.2e-01 (1.7e-01)	6.9e-01 (9.9e-02)
ENSMUSG00000067586	12.2231	0.000472016	0.0799756	38.0839	5.37249e-09	3.09371e-07	19.9497	4.65551e-05	0.00223098	24.7983	6.36528e-07	8.78727e-05	21.6071	3.34615e-06	0.000328601	27.9738	1.22971e-07	7.58606e-06	sphingosine-1-phosphate receptor 3 [Source:MGI Symbol;Acc:MGI:1339365]	13	51408639	51422797	1	protein_coding	1	S1pr3	93	214	93	61	1.52459	3.5082	1.52459	3.51	1	1.52	0.43	sphingosine-1-phosphate receptor 3	3.1e-07 ( 5.4e-09)	8.0e-02 (4.7e-04)	2.2e-03 (4.7e-05)	8.0e-02 (4.7e-04)
ENSMUSG00000038539	0.69797	0.403467	0.897928	38	5.60293e-09	3.21319e-07	0.698416	0.705246	0.85958	3.60223	0.0577022	0.23377	3.49234	0.0616534	0.251399	27.1661	1.86708e-07	1.05723e-05	activating transcription factor 5 [Source:MGI Symbol;Acc:MGI:2141857]	7	44812256	44816658	-1	protein_coding	3	Atf5	15180	15128	9782	8441	1.79837	1.7922	1.15887	1.79	1.55	1.16	1	activating transcription factor 5	3.2e-07 ( 5.6e-09)	9.0e-01 (4.0e-01)	8.6e-01 (7.1e-01)	9.0e-01 (4.0e-01)
ENSMUSG00000031434	1.10244	0.293732	0.854293	37.8598	6.00957e-09	3.43232e-07	6.69079	0.0352463	0.179804	13.8849	0.000194353	0.00602758	14.2912	0.000156596	0.00572675	45.0653	1.90574e-11	4.11729e-09	microrchidia 4 [Source:MGI Symbol;Acc:MGI:1922996]	X	139821632	139871677	-1	protein_coding	10	Morc4	105	187	48	67	1.56716	2.79104	0.716418	2.79	2.19	0.72	0.56	microrchidia 4	3.4e-07 ( 6.0e-09)	8.5e-01 (2.9e-01)	1.8e-01 (3.5e-02)	8.5e-01 (2.9e-01)
ENSMUSG00000037847	1.76223	0.184346	0.784222	37.82	6.13039e-09	3.4871e-07	5.5208	0.0632665	0.251881	22.5313	2.06743e-06	0.000204809	19.6357	9.3701e-06	0.00071904	40.812	1.67604e-10	2.64456e-08	nicotinamide riboside kinase 1 [Source:MGI Symbol;Acc:MGI:2147434]	19	18631950	18652194	1	protein_coding	5	Nmrk1	619	340	620	1120	0.552679	0.303571	0.553571	0.3	1	0.55	1.82	nicotinamide riboside kinase 1	3.5e-07 ( 6.1e-09)	7.8e-01 (1.8e-01)	2.5e-01 (6.3e-02)	7.8e-01 (1.8e-01)
ENSMUSG00000040435	11.2435	0.00079904	0.0985738	37.5721	6.93942e-09	3.91545e-07	24.13	5.75753e-06	0.000442665	32.8007	1.02109e-08	2.60377e-06	28.9574	7.39882e-08	1.73169e-05	25.7135	3.96046e-07	2.05228e-05	protein phosphatase 1, regulatory (inhibitor) subunit 15A [Source:MGI Symbol;Acc:MGI:1927072]	7	45522916	45526268	-1	protein_coding	3	Ppp1r15a	529	911	392	394	1.34264	2.31218	0.994924	2.31	1.35	0.99	0.58	protein phosphatase 1, regulatory (inhibitor) subunit 15A	3.9e-07 ( 6.9e-09)	9.9e-02 (8.0e-04)	4.4e-04 (5.8e-06)	9.9e-02 (8.0e-04)
ENSMUSG00000027806	13.1841	0.000282338	0.0577967	37.5094	7.16025e-09	4.00774e-07	16.3559	0.000280774	0.00779537	54.2576	1.75854e-13	1.8627e-10	42.621	6.64408e-11	4.44299e-08	29.1259	6.78241e-08	4.53549e-06	TSC22 domain family, member 2 [Source:MGI Symbol;Acc:MGI:1919283]	3	58414715	58466783	1	protein_coding	4	Tsc22d2	682	1033	631	470	1.45106	2.19787	1.34255	2.2	1.08	1.34	0.66	TSC22 domain family, member 2	4.0e-07 ( 7.2e-09)	5.8e-02 (2.8e-04)	7.8e-03 (2.8e-04)	5.8e-02 (2.8e-04)
ENSMUSG00000022425	2.32515	0.127298	0.739287	37.4815	7.26092e-09	4.04789e-07	3.81767	0.148253	0.401859	3.99805	0.045553	0.205052	3.7123	0.0540129	0.232812	11.672	0.00063448	0.00736364	ectonucleotide pyrophosphatase/phosphodiesterase 2 [Source:MGI Symbol;Acc:MGI:1321390]	15	54838901	54952892	-1	protein_coding	9	Enpp2	1451	1829	2029	2425	0.598351	0.754227	0.836701	0.75	0.72	0.84	0.79	ectonucleotide pyrophosphatase/phosphodiesterase 2	4.0e-07 ( 7.3e-09)	7.4e-01 (1.3e-01)	4.0e-01 (1.5e-01)	7.4e-01 (1.3e-01)
ENSMUSG00000022512	2.61571	0.10581	0.701447	37.4222	7.47966e-09	4.15329e-07	14.6449	0.000660539	0.0140898	0.204857	0.650829	0.846889	0.167196	0.682616	0.864458	3.53768	0.0599892	0.196751	claudin 1 [Source:MGI Symbol;Acc:MGI:1276109]	16	26356642	26371841	-1	protein_coding	2	Cldn1	1204	711	711	466	2.58369	1.52575	1.52575	1.53	1.69	1.53	1.69	claudin 1	4.2e-07 ( 7.5e-09)	7.0e-01 (1.1e-01)	1.4e-02 (6.6e-04)	7.0e-01 (1.1e-01)
ENSMUSG00000025504	0.0354419	0.850673	0.981331	37.3073	7.92179e-09	4.38141e-07	3.67408	0.159289	0.415922	14.954	0.000110166	0.0040132	14.4833	0.000141407	0.00529542	38.0044	7.0585e-10	8.69495e-08	EPS8-like 2 [Source:MGI Symbol;Acc:MGI:2138828]	7	141338880	141363020	1	protein_coding	12	Eps8l2	2004	2428	1518	1349	1.48554	1.79985	1.12528	1.8	1.32	1.13	0.83	EPS8-like 2	4.4e-07 ( 7.9e-09)	9.8e-01 (8.5e-01)	4.2e-01 (1.6e-01)	9.8e-01 (8.5e-01)
ENSMUSG00000031024	1.40857	0.235294	0.824781	37.2015	8.3523e-09	4.60133e-07	5.69585	0.0579644	0.240246	4.1405	0.0418688	0.194184	3.74453	0.0529805	0.229923	21.8265	2.98454e-06	0.000110005	suppression of tumorigenicity 5 [Source:MGI Symbol;Acc:MGI:108517]	7	109523911	109703605	-1	protein_coding	11	St5	572	608	355	379	1.50923	1.60422	0.936675	1.6	1.61	0.94	0.94	suppression of tumorigenicity 5	4.6e-07 ( 8.4e-09)	8.2e-01 (2.4e-01)	2.4e-01 (5.8e-02)	8.2e-01 (2.4e-01)
ENSMUSG00000110353	0.44747	0.503539	0.924817	37.1294	8.65867e-09	4.7514e-07	2.84254	0.241408	0.515334	9.96421	0.00159613	0.02494	10.693	0.00107543	0.0206597	28.6113	8.84663e-08	5.64697e-06	predicted gene, 33543 [Source:MGI Symbol;Acc:MGI:5592702]	10	95823973	95842930	-1	protein_coding	3	Gm33543	151	119	431	273	0.553114	0.435897	1.57875	0.44	0.35	1.58	1.27	predicted gene, 33543	4.8e-07 ( 8.7e-09)	9.2e-01 (5.0e-01)	5.2e-01 (2.4e-01)	9.2e-01 (5.0e-01)
ENSMUSG00000061959	5.15506	0.0231787	0.442703	36.9893	9.28707e-09	5.07633e-07	11.5771	0.00306235	0.0397647	25.5435	4.32514e-07	6.33588e-05	23.3002	1.38588e-06	0.000181887	40.3407	2.1332e-10	3.12048e-08	carboxylesterase 1E [Source:MGI Symbol;Acc:MGI:95432]	8	93201218	93229619	-1	protein_coding	3	Ces1e	3929	2416	3929	4701	0.83578	0.513933	0.83578	0.51	1	0.84	1.63	carboxylesterase 1E	5.1e-07 ( 9.3e-09)	4.4e-01 (2.3e-02)	4.0e-02 (3.1e-03)	4.4e-01 (2.3e-02)
ENSMUSG00000028300	24.502	7.42316e-07	0.000834299	36.9102	9.66149e-09	5.26044e-07	35.4698	1.98529e-08	5.05093e-06	53.2195	2.98278e-13	2.73819e-10	40.7005	1.77446e-10	1.08342e-07	15.4548	8.45001e-05	0.00160356	RIKEN cDNA 3110043O21 gene [Source:MGI Symbol;Acc:MGI:1920455]	4	35191285	35226175	-1	protein_coding	7	3110043O21Rik	302	626	337	297	1.01684	2.10774	1.13468	2.11	0.9	1.13	0.48	RIKEN cDNA 3110043O21 gene	5.3e-07 ( 9.7e-09)	8.3e-04 (7.4e-07)	5.1e-06 (2.0e-08)	8.3e-04 (7.4e-07)
ENSMUSG00000035299	7.84362	0.00510004	0.255025	36.8066	1.01753e-08	5.51873e-07	35.3933	2.0627e-08	5.09063e-06	29.0023	7.22933e-08	1.46394e-05	30.35	3.60714e-08	9.38057e-06	33.2087	8.2781e-09	7.49996e-07	midline 1 [Source:MGI Symbol;Acc:MGI:1100537]	X	169685199	170005736	1	protein_coding	15	Mid1	129	326	122	137	0.941606	2.37956	0.890511	2.38	1.06	0.89	0.4	midline 1	5.5e-07 ( 1.0e-08)	2.6e-01 (5.1e-03)	5.1e-06 (2.1e-08)	2.6e-01 (5.1e-03)
ENSMUSG00000025260	4.9671	0.0258339	0.46399	36.7638	1.03955e-08	5.61636e-07	18.8458	8.08499e-05	0.00327922	24.5753	7.14624e-07	9.37178e-05	23.0665	1.56493e-06	0.000200884	37.2502	1.03905e-09	1.2059e-07	hydroxysteroid (17-beta) dehydrogenase 10 [Source:MGI Symbol;Acc:MGI:1333871]	X	152001845	152004442	1	protein_coding	4	Hsd17b10	5756	3014	5937	6308	0.912492	0.477806	0.941186	0.48	0.97	0.94	1.91	hydroxysteroid (17-beta) dehydrogenase 10	5.6e-07 ( 1.0e-08)	4.6e-01 (2.6e-02)	3.3e-03 (8.1e-05)	4.6e-01 (2.6e-02)
ENSMUSG00000038422	27.6372	1.46335e-07	0.000191535	36.7447	1.04952e-08	5.64845e-07	44.1969	2.52798e-10	1.33349e-07	1.48932	0.222322	0.502112	1.33702	0.247561	0.54051	0.246059	0.619864	0.801691	haloacid dehalogenase-like hydrolase domain containing 3 [Source:MGI Symbol;Acc:MGI:1919998]	4	62499008	62503467	-1	protein_coding	2	Hdhd3	652	237	268	313	2.08307	0.757188	0.85623	0.76	2.43	0.86	2.75	haloacid dehalogenase-like hydrolase domain containing 3	5.6e-07 ( 1.0e-08)	1.9e-04 (1.5e-07)	1.3e-07 (2.5e-10)	1.9e-04 (1.5e-07)
ENSMUSG00000030352	0.87933	0.348385	0.879758	36.6101	1.12257e-08	6.01843e-07	3.55096	0.169402	0.429982	11.1672	0.000832576	0.0162158	10.39	0.00126702	0.0229881	22.4603	2.14534e-06	8.23144e-05	tetraspanin 9 [Source:MGI Symbol;Acc:MGI:1924558]	6	127961396	128143594	-1	protein_coding	11	Tspan9	735	914	602	538	1.36617	1.69888	1.11896	1.7	1.22	1.12	0.8	tetraspanin 9	6.0e-07 ( 1.1e-08)	8.8e-01 (3.5e-01)	4.3e-01 (1.7e-01)	8.8e-01 (3.5e-01)
ENSMUSG00000050199	0.198373	0.656037	0.948813	36.5779	1.1408e-08	6.09283e-07	5.81809	0.0545279	0.232173	20.9879	4.62189e-06	0.00038807	22.8984	1.70795e-06	0.000208563	29.2134	6.48288e-08	4.37347e-06	leucine-rich repeat-containing G protein-coupled receptor 4 [Source:MGI Symbol;Acc:MGI:1891468]	2	109917647	110014257	1	protein_coding	4	Lgr4	709	547	908	926	0.765659	0.590713	0.980562	0.59	0.78	0.98	1.3	leucine-rich repeat-containing G protein-coupled receptor 4	6.1e-07 ( 1.1e-08)	9.5e-01 (6.6e-01)	2.3e-01 (5.5e-02)	9.5e-01 (6.6e-01)
ENSMUSG00000027184	0.30392	0.581435	0.939814	36.427	1.23021e-08	6.54539e-07	3.14908	0.207103	0.47508	3.68261	0.0549826	0.228338	2.79797	0.0943839	0.321949	11.17	0.000831299	0.0090777	cell cycle associated protein 1 [Source:MGI Symbol;Acc:MGI:1858234]	2	103762941	103797649	-1	protein_coding	15	Caprin1	4385	3973	3412	2677	1.63803	1.48412	1.27456	1.48	1.29	1.27	1.1	cell cycle associated protein 1	6.5e-07 ( 1.2e-08)	9.4e-01 (5.8e-01)	4.8e-01 (2.1e-01)	9.4e-01 (5.8e-01)
ENSMUSG00000056131	10.7091	0.00106612	0.116786	36.2468	1.34617e-08	7.13522e-07	11.298	0.00352105	0.0439519	20.2713	6.72001e-06	0.000534758	20.0228	7.65226e-06	0.000607455	20.5683	5.75406e-06	0.000190576	phosphoglucomutase 3 [Source:MGI Symbol;Acc:MGI:97566]	9	86554377	86571842	-1	protein_coding	5	Pgm3	234	144	253	365	0.641096	0.394521	0.693151	0.39	0.92	0.69	1.62	phosphoglucomutase 3	7.1e-07 ( 1.3e-08)	1.2e-01 (1.1e-03)	4.4e-02 (3.5e-03)	1.2e-01 (1.1e-03)
ENSMUSG00000032500	0.732298	0.392139	0.894175	36.127	1.4293e-08	7.54723e-07	1.11044	0.573946	0.782161	5.46212	0.019433	0.122918	5.29359	0.021404	0.135456	30.861	2.77184e-08	2.13873e-06	doublecortin-like kinase 3 [Source:MGI Symbol;Acc:MGI:3039580]	9	111439081	111489118	1	protein_coding	1	Dclk3	62	56	146	145	0.427586	0.386207	1.0069	0.39	0.42	1.01	1.11	doublecortin-like kinase 3	7.5e-07 ( 1.4e-08)	8.9e-01 (3.9e-01)	7.8e-01 (5.7e-01)	8.9e-01 (3.9e-01)
ENSMUSG00000036390	3.92785	0.0474927	0.567581	36.0015	1.52188e-08	7.9759e-07	6.91007	0.0315862	0.168955	31.8322	1.68085e-08	3.79431e-06	25.3432	4.79842e-07	8.02192e-05	47.0983	6.75148e-12	1.66335e-09	growth arrest and DNA-damage-inducible 45 alpha [Source:MGI Symbol;Acc:MGI:107799]	6	67035096	67037457	-1	protein_coding	7	Gadd45a	183	888	133	70	2.61429	12.6857	1.9	12.69	1.38	1.9	0.21	growth arrest and DNA-damage-inducible 45 alpha	8.0e-07 ( 1.5e-08)	5.7e-01 (4.7e-02)	1.7e-01 (3.2e-02)	5.7e-01 (4.7e-02)
ENSMUSG00000021838	4.40501	0.0358336	0.521286	35.9312	1.57633e-08	8.23046e-07	4.41337	0.110065	0.343738	12.8731	0.000333339	0.00867689	9.98109	0.00158156	0.0264402	29.2056	6.50898e-08	4.37347e-06	sterile alpha motif domain containing 4 [Source:MGI Symbol;Acc:MGI:1921730]	14	46882854	47105815	1	protein_coding	11	Samd4	110	180	90	42	2.61905	4.28571	2.14286	4.29	1.22	2.14	0.61	sterile alpha motif domain containing 4	8.2e-07 ( 1.6e-08)	5.2e-01 (3.6e-02)	3.4e-01 (1.1e-01)	5.2e-01 (3.6e-02)
ENSMUSG00000029201	5.45412	0.0195222	0.412089	35.8079	1.67658e-08	8.65696e-07	9.30538	0.00953594	0.0817625	1.58595	0.207905	0.484163	1.07717	0.299331	0.595728	5.12953	0.0235221	0.103842	UDP-glucose dehydrogenase [Source:MGI Symbol;Acc:MGI:1306785]	5	65413221	65435949	-1	protein_coding	4	Ugdh	4976	6006	3712	2162	2.30157	2.77798	1.71693	2.78	1.34	1.72	0.83	UDP-glucose dehydrogenase	8.7e-07 ( 1.7e-08)	4.1e-01 (2.0e-02)	8.2e-02 (9.5e-03)	4.1e-01 (2.0e-02)
ENSMUSG00000054364	0.95745	0.32783	0.868406	35.813	1.67225e-08	8.65696e-07	3.7266	0.15516	0.411126	20.5745	5.73557e-06	0.00046733	18.9528	1.33996e-05	0.000936171	95.9185	1.19714e-22	2.63195e-19	ras homolog family member B [Source:MGI Symbol;Acc:MGI:107949]	12	8497661	8500009	-1	protein_coding	1	Rhob	969	1277	749	776	1.24871	1.64562	0.965206	1.65	1.29	0.97	0.76	ras homolog family member B	8.7e-07 ( 1.7e-08)	8.7e-01 (3.3e-01)	4.1e-01 (1.6e-01)	8.7e-01 (3.3e-01)
ENSMUSG00000002103	0.243952	0.621366	0.946136	35.8175	1.66853e-08	8.65696e-07	0.854993	0.65214	0.829799	3.97343	0.0462237	0.206925	3.67886	0.0551065	0.235366	14.6771	0.000127585	0.00218496	acid phosphatase 2, lysosomal [Source:MGI Symbol;Acc:MGI:87882]	2	91202885	91214098	1	protein_coding	5	Acp2	1375	1447	871	886	1.55192	1.63318	0.98307	1.63	1.58	0.98	0.95	acid phosphatase 2, lysosomal	8.7e-07 ( 1.7e-08)	9.5e-01 (6.2e-01)	8.3e-01 (6.5e-01)	9.5e-01 (6.2e-01)
ENSMUSG00000040616	2.64012	0.104195	0.697144	35.4448	2.01028e-08	1.03418e-06	5.36562	0.0683707	0.263377	21.0645	4.44086e-06	0.000377473	17.4434	2.95994e-05	0.00174836	43.8499	3.54542e-11	6.91505e-09	transmembrane protein 51 [Source:MGI Symbol;Acc:MGI:2384874]	4	142030992	142084304	-1	protein_coding	1	Tmem51	166	317	156	112	1.48214	2.83036	1.39286	2.83	1.06	1.39	0.52	transmembrane protein 51	1.0e-06 ( 2.0e-08)	7.0e-01 (1.0e-01)	2.6e-01 (6.8e-02)	7.0e-01 (1.0e-01)
ENSMUSG00000030513	1.15364	0.282789	0.850814	35.3388	2.1197e-08	1.08648e-06	4.96592	0.0834958	0.295712	15.0963	0.000102162	0.00383315	13.5332	0.000234374	0.00756625	19.6148	9.4732e-06	0.000282096	proprotein convertase subtilisin/kexin type 6 [Source:MGI Symbol;Acc:MGI:102897]	7	65861734	66050386	1	protein_coding	6	Pcsk6	2854	3551	2174	2197	1.29904	1.61629	0.989531	1.62	1.31	0.99	0.8	proprotein convertase subtilisin/kexin type 6	1.1e-06 ( 2.1e-08)	8.5e-01 (2.8e-01)	3.0e-01 (8.3e-02)	8.5e-01 (2.8e-01)
ENSMUSG00000055707	3.618	0.0571576	0.594838	35.2902	2.17185e-08	1.10915e-06	35.0776	2.41539e-08	5.82734e-06	9.28406	0.00231157	0.0319902	11.5323	0.000683964	0.0153747	14.3891	0.000148663	0.00244172	kelch-like 26 [Source:MGI Symbol;Acc:MGI:2443079]	8	70450219	70476968	-1	protein_coding	5	Klhl26	89	157	42	96	0.927083	1.63542	0.4375	1.64	2.12	0.44	0.57	kelch-like 26	1.1e-06 ( 2.2e-08)	5.9e-01 (5.7e-02)	5.8e-06 (2.4e-08)	5.9e-01 (5.7e-02)
ENSMUSG00000041895	0.103469	0.747705	0.965974	34.9302	2.60013e-08	1.31349e-06	2.08525	0.352528	0.627208	3.72601	0.0535712	0.224996	3.21632	0.0729074	0.277313	12.2037	0.000476944	0.00588036	WD repeat domain, phosphoinositide interacting 1 [Source:MGI Symbol;Acc:MGI:1261864]	11	109573331	109611967	-1	protein_coding	4	Wipi1	219	233	284	447	0.489933	0.521253	0.635347	0.52	0.77	0.64	0.94	WD repeat domain, phosphoinositide interacting 1	1.3e-06 ( 2.6e-08)	9.7e-01 (7.5e-01)	6.3e-01 (3.5e-01)	9.7e-01 (7.5e-01)
ENSMUSG00000054676	0.763556	0.382218	0.889278	34.8816	2.66411e-08	1.34096e-06	8.10893	0.0173448	0.119677	11.0334	0.000894828	0.0169255	11.213	0.000812267	0.0171447	35.7013	2.30015e-09	2.42865e-07	RIKEN cDNA 1600014C10 gene [Source:MGI Symbol;Acc:MGI:1919494]	7	38183217	38197568	1	protein_coding	9	1600014C10Rik	3853	3016	5007	4628	0.832541	0.651685	1.08189	0.65	0.77	1.08	1.28	RIKEN cDNA 1600014C10 gene	1.3e-06 ( 2.7e-08)	8.9e-01 (3.8e-01)	1.2e-01 (1.7e-02)	8.9e-01 (3.8e-01)
ENSMUSG00000029580	4.23217	0.0396646	0.535721	34.765	2.8241e-08	1.4164e-06	5.39522	0.0673663	0.261248	0.39381	0.530303	0.775353	0.328035	0.566818	0.799822	8.848	0.0029341	0.0237348	actin, beta [Source:MGI Symbol;Acc:MGI:87904]	5	142903115	142906754	-1	protein_coding	9	Actb	20144	17043	11771	12524	1.60843	1.36083	0.939875	1.36	1.71	0.94	1.18	actin, beta	1.4e-06 ( 2.8e-08)	5.4e-01 (4.0e-02)	2.6e-01 (6.7e-02)	5.4e-01 (4.0e-02)
ENSMUSG00000026020	3.78826	0.0516134	0.576166	34.7235	2.88332e-08	1.44094e-06	5.86434	0.0532813	0.229334	25.6609	4.06988e-07	6.02605e-05	23.0394	1.58717e-06	0.000200884	47.613	5.19236e-12	1.37578e-09	NOP58 ribonucleoprotein [Source:MGI Symbol;Acc:MGI:1933184]	1	59684971	59719044	1	protein_coding	15	Nop58	434	566	345	301	1.44186	1.8804	1.14618	1.88	1.26	1.15	0.77	NOP58 ribonucleoprotein	1.4e-06 ( 2.9e-08)	5.8e-01 (5.2e-02)	2.3e-01 (5.3e-02)	5.8e-01 (5.2e-02)
ENSMUSG00000047150	0.0653274	0.798266	0.977449	34.6801	2.94653e-08	1.46209e-06	5.00719	0.0817903	0.292186	11.7847	0.000597198	0.013053	11.6124	0.000655128	0.0148867	21.8174	2.99861e-06	0.000110211	RIKEN cDNA 1700001C19 gene [Source:MGI Symbol;Acc:MGI:1922712]	17	47412734	47437376	-1	protein_coding	4	1700001C19Rik	313	358	220	212	1.47642	1.68868	1.03774	1.69	1.42	1.04	0.87	RIKEN cDNA 1700001C19 gene	1.5e-06 ( 2.9e-08)	9.8e-01 (8.0e-01)	2.9e-01 (8.2e-02)	9.8e-01 (8.0e-01)
ENSMUSG00000028653	2.38265	0.122689	0.72993	34.6811	2.94507e-08	1.46209e-06	2.58636	0.274396	0.551592	9.89824	0.00165437	0.0254532	7.62066	0.00577033	0.0609312	20.0061	7.71965e-06	0.000243611	tRNA isopentenyltransferase 1 [Source:MGI Symbol;Acc:MGI:1914216]	4	123016597	123054949	1	protein_coding	3	Trit1	237	211	314	364	0.651099	0.57967	0.862637	0.58	0.75	0.86	1.12	tRNA isopentenyltransferase 1	1.5e-06 ( 2.9e-08)	7.3e-01 (1.2e-01)	5.5e-01 (2.7e-01)	7.3e-01 (1.2e-01)
ENSMUSG00000040269	2.08144	0.149099	0.766805	34.6465	2.99646e-08	1.48161e-06	2.14137	0.342774	0.620282	14.9279	0.000111699	0.00404763	13.1389	0.000289234	0.00874733	34.4914	4.28147e-09	4.23413e-07	mitochondrial ribosomal protein S28 [Source:MGI Symbol;Acc:MGI:1913480]	3	8802146	8923918	-1	protein_coding	1	Mrps28	515	423	614	892	0.577354	0.474215	0.688341	0.47	0.84	0.69	1.22	mitochondrial ribosomal protein S28	1.5e-06 ( 3.0e-08)	7.7e-01 (1.5e-01)	6.2e-01 (3.4e-01)	7.7e-01 (1.5e-01)
ENSMUSG00000032300	3.99583	0.0456131	0.563503	34.6096	3.05218e-08	1.49857e-06	35.0027	2.50757e-08	5.94719e-06	35.0407	3.22893e-09	1.01051e-06	39.9755	2.57175e-10	1.38904e-07	36.7292	1.35735e-09	1.5249e-07	RIKEN cDNA 1700017B05 gene [Source:MGI Symbol;Acc:MGI:1921461]	9	57253117	57262612	-1	protein_coding	6	1700017B05Rik	374	933	281	402	0.930348	2.3209	0.699005	2.32	1.33	0.7	0.4	RIKEN cDNA 1700017B05 gene	1.5e-06 ( 3.1e-08)	5.6e-01 (4.6e-02)	5.9e-06 (2.5e-08)	5.6e-01 (4.6e-02)
ENSMUSG00000024661	2.22261	0.136003	0.75056	34.5664	3.11883e-08	1.52593e-06	8.90655	0.0116404	0.0932899	12.204	0.000476877	0.0112058	11.8516	0.000576125	0.0135975	18.6255	1.59076e-05	0.000427951	ferritin heavy polypeptide 1 [Source:MGI Symbol;Acc:MGI:95588]	19	9982703	9985092	1	protein_coding	1	Fth1	78848	101694	62596	61685	1.27824	1.6486	1.01477	1.65	1.26	1.01	0.78	ferritin heavy polypeptide 1	1.5e-06 ( 3.1e-08)	7.5e-01 (1.4e-01)	9.3e-02 (1.2e-02)	7.5e-01 (1.4e-01)
ENSMUSG00000034450	0.0473526	0.827736	0.979708	34.5334	3.17077e-08	1.54594e-06	0.102553	0.950016	0.97793	6.53006	0.0106067	0.0851625	6.26284	0.0123296	0.0976205	24.5402	7.27741e-07	3.44097e-05	gulonolactone (L-) oxidase [Source:MGI Symbol;Acc:MGI:1353434]	14	65986786	66009207	-1	protein_coding	1	Gulo	9058	8531	11970	12005	0.754519	0.710621	0.997085	0.71	0.76	1	1.06	gulonolactone (L-) oxidase	1.5e-06 ( 3.2e-08)	9.8e-01 (8.3e-01)	9.8e-01 (9.5e-01)	9.8e-01 (8.3e-01)
ENSMUSG00000022257	4.14396	0.0417834	0.544726	34.4342	3.332e-08	1.61891e-06	4.41839	0.109789	0.343738	12.4703	0.000413473	0.0101489	9.78168	0.00176259	0.028418	15.8325	6.92023e-05	0.00136298	lysosomal-associated protein transmembrane 4B [Source:MGI Symbol;Acc:MGI:1890494]	15	34238028	34284302	1	protein_coding	4	Laptm4b	513	617	430	367	1.39782	1.6812	1.17166	1.68	1.19	1.17	0.83	lysosomal-associated protein transmembrane 4B	1.6e-06 ( 3.3e-08)	5.4e-01 (4.2e-02)	3.4e-01 (1.1e-01)	5.4e-01 (4.2e-02)
ENSMUSG00000008140	8.11949	0.00437919	0.235199	34.3367	3.49853e-08	1.69394e-06	9.59073	0.00826797	0.0752724	10.5665	0.00115154	0.0201739	9.58812	0.0019584	0.0303552	16.3011	5.40324e-05	0.00113485	ER membrane protein complex subunit 10 [Source:MGI Symbol;Acc:MGI:1916933]	7	44489937	44496529	-1	protein_coding	6	Emc10	2094	2587	1857	1700	1.23176	1.52176	1.09235	1.52	1.13	1.09	0.81	ER membrane protein complex subunit 10	1.7e-06 ( 3.5e-08)	2.4e-01 (4.4e-03)	7.5e-02 (8.3e-03)	2.4e-01 (4.4e-03)
ENSMUSG00000063590	1.92792	0.164986	0.771235	34.1777	3.78792e-08	1.82774e-06	2.46174	0.292039	0.571204	6.30826	0.0120177	0.0920729	5.55959	0.0183797	0.124689	22.4855	2.11738e-06	8.19128e-05	solute carrier family 22, member 28 [Source:MGI Symbol;Acc:MGI:3645714]	19	8062209	8131982	-1	protein_coding	1	Slc22a28	61	26	219	360	0.169444	0.0722222	0.608333	0.07	0.28	0.61	2.35	solute carrier family 22, member 28	1.8e-06 ( 3.8e-08)	7.7e-01 (1.6e-01)	5.7e-01 (2.9e-01)	7.7e-01 (1.6e-01)
ENSMUSG00000034243	0.180477	0.670964	0.953149	34.1041	3.92989e-08	1.88972e-06	3.75225	0.153183	0.409457	4.49666	0.0339612	0.173074	3.524	0.0604861	0.248365	11.246	0.00079796	0.0087988	golgi autoantigen, golgin subfamily b, macrogolgin 1 [Source:MGI Symbol;Acc:MGI:1099447]	16	36875140	36933085	1	protein_coding	7	Golgb1	965	1074	1361	1563	0.617402	0.68714	0.870761	0.69	0.71	0.87	0.9	golgi autoantigen, golgin subfamily b, macrogolgin 1	1.9e-06 ( 3.9e-08)	9.5e-01 (6.7e-01)	4.1e-01 (1.5e-01)	9.5e-01 (6.7e-01)
ENSMUSG00000028893	5.32788	0.0209869	0.421061	34.0439	4.05004e-08	1.94083e-06	19.696	5.28531e-05	0.00246524	32.8133	1.0145e-08	2.60377e-06	33.7075	6.40529e-09	2.24874e-06	39.2703	3.69004e-10	5.02518e-08	sestrin 2 [Source:MGI Symbol;Acc:MGI:2651874]	4	132492032	132510501	-1	protein_coding	1	Sesn2	466	958	372	347	1.34294	2.76081	1.07205	2.76	1.25	1.07	0.49	sestrin 2	1.9e-06 ( 4.1e-08)	4.2e-01 (2.1e-02)	2.5e-03 (5.3e-05)	4.2e-01 (2.1e-02)
ENSMUSG00000047728	4.70496	0.0300757	0.492425	34.0299	4.0785e-08	1.9478e-06	6.12541	0.0467611	0.212375	23.0887	1.54696e-06	0.000165099	21.3545	3.81718e-06	0.000364658	47.9942	4.27483e-12	1.15445e-09	cDNA sequence BC025446 [Source:MGI Symbol;Acc:MGI:2385015]	15	75216376	75222661	1	protein_coding	3	BC025446	2577	1819	2649	4197	0.61401	0.433405	0.631165	0.43	0.97	0.63	1.42	cDNA sequence BC025446	1.9e-06 ( 4.1e-08)	4.9e-01 (3.0e-02)	2.1e-01 (4.7e-02)	4.9e-01 (3.0e-02)
ENSMUSG00000054263	0.882748	0.34745	0.879608	34.0146	4.10984e-08	1.95609e-06	6.58807	0.0371038	0.186029	13.6108	0.000224885	0.00656073	12.6718	0.000371207	0.0101093	33.9447	5.67019e-09	5.38016e-07	leukemia inhibitory factor receptor [Source:MGI Symbol;Acc:MGI:96788]	15	7090614	7197489	1	protein_coding	8	Lifr	3871	2742	4910	4553	0.850209	0.60224	1.07841	0.6	0.79	1.08	1.41	leukemia inhibitory factor receptor	2.0e-06 ( 4.1e-08)	8.8e-01 (3.5e-01)	1.9e-01 (3.7e-02)	8.8e-01 (3.5e-01)
ENSMUSG00000023070	0.597032	0.439713	0.908473	33.9609	4.22173e-08	2.00253e-06	6.57286	0.0373871	0.186642	11.2261	0.000806539	0.0159112	10.9642	0.000928908	0.0186288	39.2557	3.71777e-10	5.02518e-08	regucalcin [Source:MGI Symbol;Acc:MGI:108024]	X	20549787	20562089	1	protein_coding	1	Rgn	18449	10987	22847	21788	0.846751	0.504268	1.0486	0.5	0.81	1.05	1.68	regucalcin	2.0e-06 ( 4.2e-08)	9.1e-01 (4.4e-01)	1.9e-01 (3.7e-02)	9.1e-01 (4.4e-01)
ENSMUSG00000104445	0.236818	0.626514	0.946136	33.7479	4.696e-08	2.2125e-06	2.72535	0.255975	0.530853	7.04956	0.00792845	0.0714963	7.2602	0.00704994	0.0695471	16.7555	4.25192e-05	0.000939693	Rhesus blood group-associated B glycoprotein [Source:MGI Symbol;Acc:MGI:1927379]	3	88242874	88254709	-1	protein_coding	1	Rhbg	740	1009	354	273	2.71062	3.69597	1.2967	3.7	2.09	1.3	0.73	Rhesus blood group-associated B glycoprotein	2.2e-06 ( 4.7e-08)	9.5e-01 (6.3e-01)	5.3e-01 (2.6e-01)	9.5e-01 (6.3e-01)
ENSMUSG00000021759	2.80861	0.0937599	0.673544	33.7296	4.73931e-08	2.22541e-06	10.3318	0.00570782	0.0593384	26.8235	2.22908e-07	3.5281e-05	24.1886	8.7346e-07	0.000127771	35.0078	3.28386e-09	3.34169e-07	phospholipid phosphatase 1 [Source:MGI Symbol;Acc:MGI:108412]	13	112800792	112867894	1	protein_coding	2	Plpp1	443	616	361	367	1.20708	1.67847	0.983651	1.68	1.23	0.98	0.72	phospholipid phosphatase 1	2.2e-06 ( 4.7e-08)	6.7e-01 (9.4e-02)	5.9e-02 (5.7e-03)	6.7e-01 (9.4e-02)
ENSMUSG00000032083	0.274337	0.600437	0.944377	33.6049	5.0441e-08	2.36061e-06	0.744068	0.689331	0.849028	11.6839	0.000630443	0.0135644	10.978	0.00092198	0.0185758	22.8274	1.77219e-06	7.0501e-05	apolipoprotein A-I [Source:MGI Symbol;Acc:MGI:88049]	9	46228580	46230466	1	protein_coding	2	Apoa1	264175	283210	414224	559112	0.47249	0.506535	0.740861	0.51	0.64	0.74	0.93	apolipoprotein A-I	2.4e-06 ( 5.0e-08)	9.4e-01 (6.0e-01)	8.5e-01 (6.9e-01)	9.4e-01 (6.0e-01)
ENSMUSG00000039660	1.94415	0.163219	0.769852	33.5927	5.07511e-08	2.3672e-06	4.37997	0.111919	0.346707	5.72449	0.0167299	0.113093	4.4164	0.0355951	0.182299	14.0711	0.000176028	0.0027995	SPOUT domain containing methyltransferase 1 [Source:MGI Symbol;Acc:MGI:106544]	2	30173453	30178459	-1	protein_coding	8	Spout1	361	368	443	601	0.600666	0.612313	0.737105	0.61	0.81	0.74	0.98	SPOUT domain containing methyltransferase 1	2.4e-06 ( 5.1e-08)	7.7e-01 (1.6e-01)	3.5e-01 (1.1e-01)	7.7e-01 (1.6e-01)
ENSMUSG00000074064	0.686317	0.40742	0.900338	33.5638	5.149e-08	2.37006e-06	4.11102	0.128027	0.371086	9.2629	0.00233842	0.0322646	8.27628	0.00401663	0.0477608	25.4871	4.45339e-07	2.2496e-05	malonyl-CoA decarboxylase [Source:MGI Symbol;Acc:MGI:1928485]	8	119394878	119411102	1	protein_coding	2	Mlycd	2863	2415	3815	3589	0.797715	0.672889	1.06297	0.67	0.75	1.06	1.19	malonyl-CoA decarboxylase	2.4e-06 ( 5.1e-08)	9.0e-01 (4.1e-01)	3.7e-01 (1.3e-01)	9.0e-01 (4.1e-01)
ENSMUSG00000002032	2.4477	0.117697	0.721551	33.5755	5.11873e-08	2.37006e-06	3.21378	0.200511	0.467468	15.5275	8.13133e-05	0.00327393	16.1105	5.9753e-05	0.00293396	39.7896	2.82842e-10	3.97195e-08	transmembrane protein 25 [Source:MGI Symbol;Acc:MGI:1918937]	9	44793769	44799307	-1	protein_coding	8	Tmem25	535	411	745	990	0.540404	0.415152	0.752525	0.42	0.72	0.75	1.3	transmembrane protein 25	2.4e-06 ( 5.1e-08)	7.2e-01 (1.2e-01)	4.7e-01 (2.0e-01)	7.2e-01 (1.2e-01)
ENSMUSG00000037826	0.873104	0.350098	0.881643	33.5642	5.14785e-08	2.37006e-06	1.94521	0.378096	0.646463	5.93381	0.0148531	0.104886	5.82382	0.0158106	0.113861	19.2689	1.13542e-05	0.000323689	protein phosphatase 1K (PP2C domain containing) [Source:MGI Symbol;Acc:MGI:2442111]	6	57506502	57535468	-1	protein_coding	3	Ppm1k	1192	1238	2024	1670	0.713772	0.741317	1.21198	0.74	0.59	1.21	0.96	protein phosphatase 1K (PP2C domain containing)	2.4e-06 ( 5.1e-08)	8.8e-01 (3.5e-01)	6.5e-01 (3.8e-01)	8.8e-01 (3.5e-01)
ENSMUSG00000020869	0.397102	0.528589	0.930657	33.5495	5.18582e-08	2.37141e-06	2.67951	0.261909	0.537801	2.16481	0.141202	0.396645	2.21959	0.13627	0.392782	9.8774	0.00167321	0.0154761	leucine rich repeat containing 59 [Source:MGI Symbol;Acc:MGI:2138133]	11	94629767	94645216	1	protein_coding	2	Lrrc59	2667	2135	1647	1415	1.88481	1.50883	1.16396	1.51	1.62	1.16	1.25	leucine rich repeat containing 59	2.4e-06 ( 5.2e-08)	9.3e-01 (5.3e-01)	5.4e-01 (2.6e-01)	9.3e-01 (5.3e-01)
ENSMUSG00000074743	8.37374	0.00380682	0.224673	33.5317	5.23209e-08	2.38478e-06	9.53694	0.00849337	0.0762823	17.7781	2.48224e-05	0.00142419	14.6812	0.00012731	0.00489814	30.8405	2.80133e-08	2.14968e-06	thrombomodulin [Source:MGI Symbol;Acc:MGI:98736]	2	148404466	148408188	-1	protein_coding	1	Thbd	233	383	224	150	1.55333	2.55333	1.49333	2.55	1.04	1.49	0.61	thrombomodulin	2.4e-06 ( 5.2e-08)	2.2e-01 (3.8e-03)	7.6e-02 (8.5e-03)	2.2e-01 (3.8e-03)
ENSMUSG00000005547	1.23346	0.266735	0.845009	33.4128	5.55276e-08	2.52272e-06	2.618	0.27009	0.546672	10.103	0.0014803	0.0235922	8.87207	0.00289567	0.0388384	17.8083	2.44314e-05	0.000601912	cytochrome P450, family 2, subfamily a, polypeptide 5 [Source:MGI Symbol;Acc:MGI:88597]	7	26835305	26843548	1	protein_coding	5	Cyp2a5	85117	165031	45451	28260	3.01192	5.83974	1.60832	5.84	1.87	1.61	0.52	cytochrome P450, family 2, subfamily a, polypeptide 5	2.5e-06 ( 5.6e-08)	8.5e-01 (2.7e-01)	5.5e-01 (2.7e-01)	8.5e-01 (2.7e-01)
ENSMUSG00000021211	1.97615	0.159797	0.769852	33.3227	5.80847e-08	2.61344e-06	8.54103	0.0139746	0.105473	23.7555	1.09384e-06	0.000133294	20.5955	5.67307e-06	0.000488754	41.2646	1.32955e-10	2.22272e-08	aldo-keto reductase family 1, member C12 [Source:MGI Symbol;Acc:MGI:1351661]	13	4268176	4279433	-1	protein_coding	1	Akr1c12	2029	1527	2592	2565	0.791033	0.595322	1.01053	0.6	0.78	1.01	1.33	aldo-keto reductase family 1, member C12	2.6e-06 ( 5.8e-08)	7.7e-01 (1.6e-01)	1.1e-01 (1.4e-02)	7.7e-01 (1.6e-01)
ENSMUSG00000028008	0.110678	0.739373	0.965341	33.3265	5.79755e-08	2.61344e-06	4.61912	0.099305	0.325351	19.2269	1.16067e-05	0.000791209	20.011	7.69971e-06	0.000607455	36.0969	1.87741e-09	2.04376e-07	acid-sensing (proton-gated) ion channel family member 5 [Source:MGI Symbol;Acc:MGI:1929259]	3	81982290	82021233	1	protein_coding	3	Asic5	100	66	293	196	0.510204	0.336735	1.4949	0.34	0.34	1.49	1.52	acid-sensing (proton-gated) ion channel family member 5	2.6e-06 ( 5.8e-08)	9.7e-01 (7.4e-01)	3.3e-01 (9.9e-02)	9.7e-01 (7.4e-01)
ENSMUSG00000033068	0.258436	0.611197	0.945252	33.2923	5.89756e-08	2.64502e-06	2.07674	0.354031	0.628294	2.50258	0.11366	0.348808	1.86452	0.172104	0.448891	12.1055	0.000502746	0.00616599	ectonucleoside triphosphate diphosphohydrolase 6 [Source:MGI Symbol;Acc:MGI:1202295]	2	150749042	150771675	1	protein_coding	4	Entpd6	240	181	132	106	2.26415	1.70755	1.24528	1.71	1.82	1.25	1.33	ectonucleoside triphosphate diphosphohydrolase 6	2.6e-06 ( 5.9e-08)	9.5e-01 (6.1e-01)	6.3e-01 (3.5e-01)	9.5e-01 (6.1e-01)
ENSMUSG00000038092	7.29202	0.00692615	0.288037	33.2688	5.96709e-08	2.65916e-06	15.6344	0.000402746	0.00990443	10.1991	0.00140509	0.0228701	10.1778	0.00142142	0.0247331	24.6636	6.82626e-07	3.26059e-05	hydroxy-delta-5-steroid dehydrogenase, 3 beta- and steroid delta-isomerase 5 [Source:MGI Symbol;Acc:MGI:104645]	3	98618634	98630252	-1	protein_coding	1	Hsd3b5	139	3	2916	2484	0.0559581	0.00120773	1.17391	0	0.05	1.17	46.33	hydroxy-delta-5-steroid dehydrogenase, 3 beta- and steroid delta-isomerase 5	2.7e-06 ( 6.0e-08)	2.9e-01 (6.9e-03)	9.9e-03 (4.0e-04)	2.9e-01 (6.9e-03)
ENSMUSG00000015749	0.335413	0.562489	0.936478	33.2724	5.95644e-08	2.65916e-06	1.26823	0.530404	0.753879	2.24979	0.133632	0.384078	1.84696	0.174138	0.451434	8.69533	0.00319026	0.0253648	acidic (leucine-rich) nuclear phosphoprotein 32 family, member E [Source:MGI Symbol;Acc:MGI:1913721]	3	95929246	95947390	1	protein_coding	10	Anp32e	407	381	277	235	1.73191	1.62128	1.17872	1.62	1.47	1.18	1.07	acidic (leucine-rich) nuclear phosphoprotein 32 family, member E	2.7e-06 ( 6.0e-08)	9.4e-01 (5.6e-01)	7.5e-01 (5.3e-01)	9.4e-01 (5.6e-01)
ENSMUSG00000038550	29.4181	5.83317e-08	8.7256e-05	33.1285	6.40081e-08	2.83438e-06	65.268	6.71795e-15	1.56674e-11	2.30557	0.128911	0.375729	1.94438	0.163194	0.43652	0.332402	0.564248	0.763651	circadian associated repressor of transcription [Source:MGI Symbol;Acc:MGI:2684975]	3	95878503	95882251	-1	protein_coding	6	Ciart	423	1287	785	1030	0.41068	1.24951	0.762136	1.25	0.54	0.76	0.33	circadian associated repressor of transcription	2.8e-06 ( 6.4e-08)	8.7e-05 (5.8e-08)	1.6e-11 (6.7e-15)	8.7e-05 (5.8e-08)
ENSMUSG00000031665	0.409944	0.521998	0.9286	33.1335	6.38494e-08	2.83438e-06	13.0488	0.00146721	0.0242827	16.9121	3.91514e-05	0.00196757	16.2968	5.4156e-05	0.00273523	34.4328	4.41216e-09	4.33286e-07	spalt like transcription factor 1 [Source:MGI Symbol;Acc:MGI:1889585]	8	89027235	89044162	-1	protein_coding	1	Sall1	642	868	420	477	1.34591	1.81971	0.880503	1.82	1.53	0.88	0.74	spalt like transcription factor 1	2.8e-06 ( 6.4e-08)	9.3e-01 (5.2e-01)	2.4e-02 (1.5e-03)	9.3e-01 (5.2e-01)
ENSMUSG00000046962	2.52064	0.112365	0.71228	32.9312	7.06452e-08	3.11842e-06	19.1765	6.85289e-05	0.00299862	39.4445	3.3751e-10	1.40834e-07	36.4857	1.53793e-09	6.35211e-07	31.6834	1.81464e-08	1.499e-06	zinc finger and BTB domain containing 21 [Source:MGI Symbol;Acc:MGI:1927240]	16	97943357	97962622	-1	protein_coding	8	Zbtb21	250	440	192	206	1.21359	2.13592	0.932039	2.14	1.3	0.93	0.57	zinc finger and BTB domain containing 21	3.1e-06 ( 7.1e-08)	7.1e-01 (1.1e-01)	3.0e-03 (6.9e-05)	7.1e-01 (1.1e-01)
ENSMUSG00000067813	2.39557	0.12168	0.729183	32.9164	7.1168e-08	3.13162e-06	34.809	2.76263e-08	6.34432e-06	0.0210448	0.884657	0.957231	0.00354252	0.952539	0.981329	1.51575	0.218264	0.445053	X-linked Kx blood group related 9 [Source:MGI Symbol;Acc:MGI:2686466]	1	13668771	13701723	1	protein_coding	1	Xkr9	577	354	390	194	2.97423	1.82474	2.01031	1.82	1.48	2.01	1.63	X-linked Kx blood group related 9	3.1e-06 ( 7.1e-08)	7.3e-01 (1.2e-01)	6.3e-06 (2.8e-08)	7.3e-01 (1.2e-01)
ENSMUSG00000036752	0.574318	0.448548	0.910523	32.9065	7.15242e-08	3.13742e-06	6.89731	0.0317884	0.169542	0.484539	0.486373	0.743078	0.416233	0.518823	0.771425	7.41413	0.00647137	0.0420294	tubulin, beta 4B class IVB [Source:MGI Symbol;Acc:MGI:1915472]	2	25222160	25224702	-1	protein_coding	2	Tubb4b	4332	3998	3062	2080	2.08269	1.92212	1.47212	1.92	1.41	1.47	1.08	tubulin, beta 4B class IVB	3.1e-06 ( 7.2e-08)	9.1e-01 (4.5e-01)	1.7e-01 (3.2e-02)	9.1e-01 (4.5e-01)
ENSMUSG00000032531	4.85534	0.0275606	0.472519	32.7423	7.76429e-08	3.3846e-06	4.91283	0.0857419	0.300397	8.06408	0.00451515	0.0496594	7.30802	0.00686477	0.0687385	20.7814	5.14797e-06	0.000173779	angiomotin-like 2 [Source:MGI Symbol;Acc:MGI:1929286]	9	102716672	102733418	1	protein_coding	14	Amotl2	618	529	638	866	0.713626	0.610855	0.736721	0.61	0.97	0.74	1.17	angiomotin-like 2	3.4e-06 ( 7.8e-08)	4.7e-01 (2.8e-02)	3.0e-01 (8.6e-02)	4.7e-01 (2.8e-02)
ENSMUSG00000071632	2.13279	0.144178	0.762604	32.7115	7.88493e-08	3.42652e-06	21.6112	2.02858e-05	0.00117784	27.2182	1.81741e-07	2.97925e-05	28.9715	7.34499e-08	1.73169e-05	32.8574	9.91738e-09	8.81454e-07	RIKEN cDNA 2510002D24 gene [Source:MGI Symbol;Acc:MGI:1919557]	16	18836578	18840160	1	protein_coding	4	2510002D24Rik	458	247	490	460	0.995652	0.536957	1.06522	0.54	0.93	1.07	1.85	RIKEN cDNA 2510002D24 gene	3.4e-06 ( 7.9e-08)	7.6e-01 (1.4e-01)	1.2e-03 (2.0e-05)	7.6e-01 (1.4e-01)
ENSMUSG00000090264	0.00712028	0.932753	0.991717	32.5116	8.71375e-08	3.77497e-06	3.76455	0.152243	0.408378	6.49433	0.0108219	0.0862869	4.84323	0.0277548	0.157529	9.31561	0.0022721	0.0194606	eukaryotic translation initiation factor 4E binding protein 3 [Source:MGI Symbol;Acc:MGI:1270847]	18	36664060	36665917	1	protein_coding	1	Eif4ebp3	748	1103	2715	5170	0.144681	0.213346	0.525145	0.21	0.28	0.53	0.68	eukaryotic translation initiation factor 4E binding protein 3	3.8e-06 ( 8.7e-08)	9.9e-01 (9.3e-01)	4.1e-01 (1.5e-01)	9.9e-01 (9.3e-01)
ENSMUSG00000015776	0.43432	0.509877	0.925885	32.4789	8.85722e-08	3.82528e-06	8.04617	0.0178977	0.121147	15.2961	9.19066e-05	0.0035312	14.1408	0.000169627	0.00609226	43.5313	4.17233e-11	8.02631e-09	mediator complex subunit 22 [Source:MGI Symbol;Acc:MGI:98446]	2	26905262	26910677	-1	protein_coding	3	Med22	466	338	623	577	0.807626	0.585789	1.07972	0.59	0.75	1.08	1.38	mediator complex subunit 22	3.8e-06 ( 8.9e-08)	9.3e-01 (5.1e-01)	1.2e-01 (1.8e-02)	9.3e-01 (5.1e-01)
ENSMUSG00000030590	0.089623	0.764657	0.971196	32.4312	9.071e-08	3.90555e-06	0.63664	0.72737	0.871266	8.79507	0.00302046	0.0376396	7.19076	0.00732798	0.071222	18.6622	1.56049e-05	0.000421422	family with sequence similarity 98, member C [Source:MGI Symbol;Acc:MGI:1921083]	7	29152510	29156234	-1	protein_coding	9	Fam98c	371	335	505	571	0.649737	0.58669	0.884413	0.59	0.73	0.88	1.11	family with sequence similarity 98, member C	3.9e-06 ( 9.1e-08)	9.7e-01 (7.6e-01)	8.7e-01 (7.3e-01)	9.7e-01 (7.6e-01)
ENSMUSG00000024665	0.393894	0.53026	0.931602	32.2537	9.91293e-08	4.24195e-06	4.21953	0.121266	0.362349	4.18272	0.0408381	0.191794	4.94375	0.0261852	0.152834	22.4392	2.16898e-06	8.29945e-05	fatty acid desaturase 2 [Source:MGI Symbol;Acc:MGI:1930079]	19	10064164	10101503	-1	protein_coding	1	Fads2	5681	4857	9675	10874	0.522439	0.446662	0.889737	0.45	0.59	0.89	1.17	fatty acid desaturase 2	4.2e-06 ( 9.9e-08)	9.3e-01 (5.3e-01)	3.6e-01 (1.2e-01)	9.3e-01 (5.3e-01)
ENSMUSG00000078672	0.792038	0.373485	0.887872	32.1819	1.0275e-07	4.38349e-06	7.83459	0.0198949	0.128467	4.80323	0.0284064	0.154892	4.80722	0.0283408	0.159544	26.1517	3.15618e-07	1.7047e-05	major urinary protein 20 [Source:MGI Symbol;Acc:MGI:3651981]	4	62050234	62054158	-1	protein_coding	1	Mup20	117406	43157	206919	303515	0.386821	0.142191	0.681742	0.14	0.57	0.68	2.72	major urinary protein 20	4.4e-06 ( 1.0e-07)	8.9e-01 (3.7e-01)	1.3e-01 (2.0e-02)	8.9e-01 (3.7e-01)
ENSMUSG00000025132	0.0562918	0.812456	0.979456	32.1677	1.03483e-07	4.38951e-06	11.9911	0.0024898	0.0345857	16.6529	4.48824e-05	0.00218114	17.0225	3.69405e-05	0.00205041	42.8332	5.9612e-11	1.08718e-08	Rho GDP dissociation inhibitor (GDI) alpha [Source:MGI Symbol;Acc:MGI:2178103]	11	120578104	120581624	-1	protein_coding	2	Arhgdia	1764	2705	1365	1757	1.00398	1.53956	0.776892	1.54	1.29	0.78	0.65	Rho GDP dissociation inhibitor (GDI) alpha	4.4e-06 ( 1.0e-07)	9.8e-01 (8.1e-01)	3.5e-02 (2.5e-03)	9.8e-01 (8.1e-01)
ENSMUSG00000027261	0.480836	0.488044	0.91938	32.167	1.03519e-07	4.38951e-06	3.03749	0.218987	0.489189	10.1606	0.00143476	0.0231613	9.96245	0.00159765	0.0265374	37.5094	9.09734e-10	1.08266e-07	hydroxyacid oxidase 1, liver [Source:MGI Symbol;Acc:MGI:96011]	2	134497361	134554368	-1	protein_coding	2	Hao1	4046	3054	4854	6474	0.624961	0.471733	0.749768	0.47	0.83	0.75	1.32	hydroxyacid oxidase 1, liver	4.4e-06 ( 1.0e-07)	9.2e-01 (4.9e-01)	4.9e-01 (2.2e-01)	9.2e-01 (4.9e-01)
ENSMUSG00000024827	1.39145	0.238161	0.826752	32.0847	1.0787e-07	4.56019e-06	1.54673	0.461457	0.708645	3.4209	0.0643758	0.248725	3.46421	0.0627106	0.253496	12.8605	0.000335594	0.00451412	glycine decarboxylase [Source:MGI Symbol;Acc:MGI:1341155]	19	30098449	30175418	-1	protein_coding	1	Gldc	3091	2919	2412	2009	1.53858	1.45296	1.2006	1.45	1.28	1.2	1.06	glycine decarboxylase	4.6e-06 ( 1.1e-07)	8.3e-01 (2.4e-01)	7.1e-01 (4.6e-01)	8.3e-01 (2.4e-01)
ENSMUSG00000029650	0.0360306	0.849452	0.981331	31.9159	1.17368e-07	4.94676e-06	1.24576	0.536398	0.75824	13.7879	0.000204653	0.00616646	14.8683	0.000115287	0.00464376	40.4053	2.06385e-10	3.08039e-08	solute carrier family 46, member 3 [Source:MGI Symbol;Acc:MGI:1918956]	5	147878437	147894815	-1	protein_coding	4	Slc46a3	627	523	729	888	0.706081	0.588964	0.820946	0.59	0.86	0.82	1.2	solute carrier family 46, member 3	4.9e-06 ( 1.2e-07)	9.8e-01 (8.5e-01)	7.6e-01 (5.4e-01)	9.8e-01 (8.5e-01)
ENSMUSG00000058207	5.75915	0.016403	0.397582	31.8982	1.1841e-07	4.97569e-06	13.7214	0.0010482	0.0193247	20.5078	5.93892e-06	0.00047824	18.3153	1.87198e-05	0.00121144	27.8032	1.34307e-07	8.07995e-06	serine (or cysteine) peptidase inhibitor, clade A, member 3K [Source:MGI Symbol;Acc:MGI:98377]	12	104338486	104346144	1	protein_coding	1	Serpina3k	236113	124648	239429	283215	0.833688	0.440118	0.845397	0.44	0.99	0.85	1.89	serine (or cysteine) peptidase inhibitor, clade A, member 3K	5.0e-06 ( 1.2e-07)	4.0e-01 (1.6e-02)	1.9e-02 (1.0e-03)	4.0e-01 (1.6e-02)
ENSMUSG00000043091	1.78279e-05	0.996631	0.999474	31.8624	1.20553e-07	5.05059e-06	2.20837	0.331481	0.609037	0.931903	0.334369	0.622354	0.909121	0.340348	0.63611	7.48172	0.00623286	0.0409429	tubulin, alpha 1C [Source:MGI Symbol;Acc:MGI:1095409]	15	99029891	99038110	1	protein_coding	2	Tuba1c	3594	3202	2625	1919	1.87285	1.66858	1.3679	1.67	1.37	1.37	1.12	tubulin, alpha 1C	5.1e-06 ( 1.2e-07)	1.0e+00 (1.0e+00)	6.1e-01 (3.3e-01)	1.0e+00 (1.0e+00)
ENSMUSG00000051579	1.35753	0.243966	0.830235	31.8436	1.21691e-07	5.08306e-06	1.50147	0.47202	0.715881	1.89709	0.168404	0.432636	1.54286	0.214193	0.499622	6.92245	0.00851203	0.0511487	transcription elongation factor A (SII)-like 8 [Source:MGI Symbol;Acc:MGI:1913934]	X	136168984	136172342	-1	protein_coding	4	Tceal8	650	556	411	315	2.06349	1.76508	1.30476	1.77	1.58	1.3	1.17	transcription elongation factor A (SII)-like 8	5.1e-06 ( 1.2e-07)	8.3e-01 (2.4e-01)	7.2e-01 (4.7e-01)	8.3e-01 (2.4e-01)
ENSMUSG00000003123	5.74932	0.016495	0.398117	31.8088	1.23824e-07	5.13734e-06	9.84673	0.00727462	0.0696741	5.31078	0.0211939	0.129937	4.38452	0.0362666	0.184126	9.79888	0.00174618	0.0159854	lipase, hormone sensitive [Source:MGI Symbol;Acc:MGI:96790]	7	25379527	25398710	-1	protein_coding	8	Lipe	282	274	341	563	0.500888	0.486679	0.605684	0.49	0.83	0.61	1.03	lipase, hormone sensitive	5.1e-06 ( 1.2e-07)	4.0e-01 (1.6e-02)	7.0e-02 (7.3e-03)	4.0e-01 (1.6e-02)
ENSMUSG00000024921	0.181861	0.669779	0.952436	31.8112	1.23677e-07	5.13734e-06	0.946626	0.622935	0.812749	6.771	0.00926511	0.0784628	5.93258	0.0148635	0.109915	15.5429	8.06525e-05	0.00154727	SWI/SNF related, matrix associated, actin dependent regulator of chromatin, subfamily a, member 2 [Source:MGI Symbol;Acc:MGI:99603]	19	26605050	26778322	1	protein_coding	46	Smarca2	1816	1912	2169	3039	0.597565	0.629154	0.713722	0.63	0.84	0.71	0.95	SWI/SNF related, matrix associated, actin dependent regulator of chromatin, subfamily a, member 2	5.1e-06 ( 1.2e-07)	9.5e-01 (6.7e-01)	8.1e-01 (6.2e-01)	9.5e-01 (6.7e-01)
ENSMUSG00000039960	13.8812	0.000194733	0.0474197	31.5587	1.40318e-07	5.7749e-06	35.6547	1.80998e-08	4.8706e-06	47.0898	6.78074e-12	4.91425e-09	40.188	2.30666e-10	1.33488e-07	20.3814	6.34424e-06	0.000206232	ras homolog family member U [Source:MGI Symbol;Acc:MGI:1916831]	8	123653929	123663884	1	protein_coding	2	Rhou	1160	2059	1160	1118	1.03757	1.84168	1.03757	1.84	1	1.04	0.56	ras homolog family member U	5.8e-06 ( 1.4e-07)	4.7e-02 (1.9e-04)	4.9e-06 (1.8e-08)	4.7e-02 (1.9e-04)
ENSMUSG00000039233	1.35198	0.244931	0.830381	31.544	1.41352e-07	5.80039e-06	5.83814	0.0539838	0.230839	5.58396	0.0181257	0.118346	6.02966	0.0140675	0.106152	14.2773	0.000157755	0.00254638	tubulin-specific chaperone E [Source:MGI Symbol;Acc:MGI:1917680]	13	13997949	14039638	-1	protein_coding	13	Tbce	437	464	309	349	1.25215	1.32951	0.885387	1.33	1.41	0.89	0.94	tubulin-specific chaperone E	5.8e-06 ( 1.4e-07)	8.3e-01 (2.4e-01)	2.3e-01 (5.4e-02)	8.3e-01 (2.4e-01)
ENSMUSG00000028680	7.18599	0.00734749	0.292531	31.4087	1.51247e-07	6.18829e-06	18.8106	8.22863e-05	0.00329497	22.2705	2.36814e-06	0.000228037	19.9823	7.81612e-06	0.000613194	22.2854	2.34984e-06	8.91858e-05	polo like kinase 3 [Source:MGI Symbol;Acc:MGI:109604]	4	117128655	117133963	-1	protein_coding	3	Plk3	4373	13603	3192	2051	2.13213	6.63237	1.55631	6.63	1.37	1.56	0.32	polo like kinase 3	6.2e-06 ( 1.5e-07)	2.9e-01 (7.3e-03)	3.3e-03 (8.2e-05)	2.9e-01 (7.3e-03)
ENSMUSG00000022218	0.00237817	0.961105	0.99599	31.3923	1.52496e-07	6.22123e-06	7.05632	0.0293588	0.162958	4.97161	0.0257667	0.146736	4.59859	0.0319982	0.171247	15.2519	9.40843e-05	0.00173617	transglutaminase 1, K polypeptide [Source:MGI Symbol;Acc:MGI:98730]	14	55700009	55713926	-1	protein_coding	6	Tgm1	126	165	188	359	0.350975	0.45961	0.523677	0.46	0.67	0.52	0.76	transglutaminase 1, K polypeptide	6.2e-06 ( 1.5e-07)	1.0e+00 (9.6e-01)	1.6e-01 (2.9e-02)	1.0e+00 (9.6e-01)
ENSMUSG00000028339	0.145374	0.702996	0.959598	31.3316	1.57191e-07	6.39409e-06	6.09885	0.0473862	0.214448	1.09423	0.295536	0.58595	0.791717	0.373581	0.662985	10.3469	0.00129694	0.012772	collagen, type XV, alpha 1 [Source:MGI Symbol;Acc:MGI:88449]	4	47208161	47313167	1	protein_coding	9	Col15a1	173	112	111	39	4.4359	2.87179	2.84615	2.87	1.56	2.85	1.54	collagen, type XV, alpha 1	6.4e-06 ( 1.6e-07)	9.6e-01 (7.0e-01)	2.1e-01 (4.7e-02)	9.6e-01 (7.0e-01)
ENSMUSG00000040451	3.50054	0.0613489	0.607951	31.264	1.62597e-07	6.59486e-06	8.63548	0.01333	0.102262	25.2192	5.11707e-07	7.26413e-05	20.9161	4.79852e-06	0.000440429	31.0504	2.51413e-08	1.96144e-06	sphingomyelin synthase 1 [Source:MGI Symbol;Acc:MGI:2444110]	19	32122727	32389714	-1	protein_coding	14	Sgms1	361	576	323	306	1.17974	1.88235	1.05556	1.88	1.12	1.06	0.63	sphingomyelin synthase 1	6.6e-06 ( 1.6e-07)	6.1e-01 (6.1e-02)	1.0e-01 (1.3e-02)	6.1e-01 (6.1e-02)
ENSMUSG00000019996	1.15847	0.281783	0.850485	31.2377	1.64747e-07	6.66272e-06	17.6691	0.000145616	0.00500641	15.8146	6.98628e-05	0.00296003	16.5727	4.68197e-05	0.00245332	22.6169	1.97739e-06	7.75658e-05	microtubule-associated protein 7 [Source:MGI Symbol;Acc:MGI:1328328]	10	20148471	20281590	1	protein_coding	13	Map7	619	870	545	558	1.10932	1.55914	0.976703	1.56	1.14	0.98	0.71	microtubule-associated protein 7	6.7e-06 ( 1.6e-07)	8.5e-01 (2.8e-01)	5.0e-03 (1.5e-04)	8.5e-01 (2.8e-01)
ENSMUSG00000040548	0.165221	0.684394	0.956016	31.1644	1.709e-07	6.87183e-06	1.14009	0.565499	0.777301	2.94009	0.0864058	0.29671	2.50786	0.11328	0.355334	9.31841	0.00226862	0.0194495	testis expressed gene 2 [Source:MGI Symbol;Acc:MGI:102465]	11	106502147	106613423	-1	protein_coding	5	Tex2	3355	3317	2651	2089	1.60603	1.58784	1.26903	1.59	1.27	1.27	1.01	testis expressed gene 2	6.9e-06 ( 1.7e-07)	9.6e-01 (6.8e-01)	7.8e-01 (5.7e-01)	9.6e-01 (6.8e-01)
ENSMUSG00000021707	0.755077	0.384873	0.890778	31.1295	1.7391e-07	6.97284e-06	6.79417	0.0334706	0.174304	11.6356	0.000647008	0.0138343	13.5559	0.000231567	0.00752753	48.7132	2.96271e-12	8.32107e-10	dihydrofolate reductase [Source:MGI Symbol;Acc:MGI:94890]	13	92354726	92389053	1	protein_coding	1	Dhfr	904	694	1384	1056	0.856061	0.657197	1.31061	0.66	0.65	1.31	1.3	dihydrofolate reductase	7.0e-06 ( 1.7e-07)	8.9e-01 (3.8e-01)	1.7e-01 (3.3e-02)	8.9e-01 (3.8e-01)
ENSMUSG00000027533	1.91627	0.166269	0.77309	31.1044	1.76101e-07	7.02047e-06	1.92625	0.381698	0.649611	9.29393	0.00229914	0.0318503	9.49808	0.00205687	0.0313964	12.9718	0.00031621	0.00433223	fatty acid binding protein 5, epidermal [Source:MGI Symbol;Acc:MGI:101790]	3	10012548	10016607	1	protein_coding	2	Fabp5	136	85	334	453	0.300221	0.187638	0.737307	0.19	0.41	0.74	1.6	fatty acid binding protein 5, epidermal	7.0e-06 ( 1.8e-07)	7.7e-01 (1.7e-01)	6.5e-01 (3.8e-01)	7.7e-01 (1.7e-01)
ENSMUSG00000025269	2.07868	0.14937	0.766814	31.0462	1.81306e-07	7.20741e-06	4.83334	0.089218	0.306588	7.07231	0.00782844	0.0711014	5.44892	0.0195804	0.12861	11.4449	0.000716924	0.00806066	apurinic/apyrimidinic endonuclease 2 [Source:MGI Symbol;Acc:MGI:1924872]	X	150519519	150589868	-1	protein_coding	10	Apex2	137	134	195	295	0.464407	0.454237	0.661017	0.45	0.7	0.66	1.02	apurinic/apyrimidinic endonuclease 2	7.2e-06 ( 1.8e-07)	7.7e-01 (1.5e-01)	3.1e-01 (8.9e-02)	7.7e-01 (1.5e-01)
ENSMUSG00000037108	0.0850901	0.770514	0.971631	30.9587	1.8941e-07	7.50826e-06	0.363845	0.833666	0.924658	6.86004	0.00881448	0.0763367	5.52068	0.0187929	0.126108	16.7169	4.33935e-05	0.000955133	zinc finger, CW type with PWWP domain 1 [Source:MGI Symbol;Acc:MGI:2685899]	5	137787798	137822621	1	protein_coding	5	Zcwpw1	140	161	97	78	1.79487	2.0641	1.24359	2.06	1.44	1.24	0.87	zinc finger, CW type with PWWP domain 1	7.5e-06 ( 1.9e-07)	9.7e-01 (7.7e-01)	9.2e-01 (8.3e-01)	9.7e-01 (7.7e-01)
ENSMUSG00000051502	1.64696	0.199373	0.799542	30.9019	1.94866e-07	7.70271e-06	1.67356	0.433103	0.688603	10.2595	0.00135985	0.0223864	7.96006	0.00478209	0.0533399	12.9599	0.000318241	0.00435156	UFM1-specific peptidase 1 [Source:MGI Symbol;Acc:MGI:1917490]	5	137294629	137295665	1	protein_coding	1	Ufsp1	42	34	79	112	0.375	0.303571	0.705357	0.3	0.53	0.71	1.24	UFM1-specific peptidase 1	7.7e-06 ( 1.9e-07)	8.0e-01 (2.0e-01)	6.9e-01 (4.3e-01)	8.0e-01 (2.0e-01)
ENSMUSG00000025464	0.00499948	0.943631	0.993666	30.7076	2.14743e-07	8.4645e-06	10.5332	0.00516111	0.0561145	14.4646	0.000142818	0.00486972	17.6796	2.61417e-05	0.00160309	29.3121	6.16091e-08	4.22038e-06	polyamine oxidase (exo-N4-amino) [Source:MGI Symbol;Acc:MGI:1916983]	7	140115799	140137224	1	protein_coding	5	Paox	895	647	1268	1063	0.841957	0.608655	1.19285	0.61	0.71	1.19	1.38	polyamine oxidase (exo-N4-amino)	8.5e-06 ( 2.1e-07)	9.9e-01 (9.4e-01)	5.6e-02 (5.2e-03)	9.9e-01 (9.4e-01)
ENSMUSG00000038576	0.48394	0.486643	0.918994	30.6784	2.17905e-07	8.56499e-06	1.54589	0.461651	0.708865	14.5396	0.000137242	0.00474829	13.1655	0.000285146	0.00872399	30.9049	2.70993e-08	2.10252e-06	sushi domain containing 4 [Source:MGI Symbol;Acc:MGI:2138351]	1	182763860	182896591	1	protein_coding	5	Susd4	321	367	535	692	0.463873	0.530347	0.773121	0.53	0.6	0.77	0.87	sushi domain containing 4	8.6e-06 ( 2.2e-07)	9.2e-01 (4.9e-01)	7.1e-01 (4.6e-01)	9.2e-01 (4.9e-01)
ENSMUSG00000029759	0.156706	0.692207	0.957604	30.6303	2.2321e-07	8.74895e-06	0.246054	0.88424	0.947472	4.92224	0.0265132	0.14932	4.27078	0.0387732	0.19206	10.7584	0.00103806	0.0107442	paraoxonase 3 [Source:MGI Symbol;Acc:MGI:106686]	6	5220852	5256286	-1	protein_coding	6	Pon3	1655	1642	1227	1274	1.29906	1.28885	0.963108	1.29	1.35	0.96	1.01	paraoxonase 3	8.7e-06 ( 2.2e-07)	9.6e-01 (6.9e-01)	9.5e-01 (8.8e-01)	9.6e-01 (6.9e-01)
ENSMUSG00000027086	0.118099	0.731106	0.964564	30.6013	2.26475e-07	8.85215e-06	2.26221	0.322676	0.602265	5.61564	0.0178009	0.116946	4.98441	0.0255767	0.150408	14.7603	0.000122082	0.0021263	FAST kinase domains 1 [Source:MGI Symbol;Acc:MGI:2444596]	2	69686815	69713516	-1	protein_coding	4	Fastkd1	347	384	446	589	0.589134	0.651952	0.757216	0.65	0.78	0.76	0.9	FAST kinase domains 1	8.9e-06 ( 2.3e-07)	9.6e-01 (7.3e-01)	6.0e-01 (3.2e-01)	9.6e-01 (7.3e-01)
ENSMUSG00000112129	0.662987	0.415507	0.903776	30.56	2.31191e-07	9.01129e-06	6.53208	0.0381572	0.188536	15.7678	7.16091e-05	0.00301821	16.3847	5.17e-05	0.00262102	65.6248	5.45478e-16	3.3305e-13	phenazine biosynthesis-like protein domain containing 1 [Source:MGI Symbol;Acc:MGI:1915621]	10	63060162	63077962	1	protein_coding	7	Pbld1	6190	4199	7490	7252	0.853558	0.579013	1.03282	0.58	0.83	1.03	1.47	phenazine biosynthesis-like protein domain containing 1	9.0e-06 ( 2.3e-07)	9.0e-01 (4.2e-01)	1.9e-01 (3.8e-02)	9.0e-01 (4.2e-01)
ENSMUSG00000072704	0.200169	0.654584	0.948813	30.4255	2.47279e-07	9.58495e-06	11.7044	0.00287361	0.0379702	11.7154	0.000619836	0.01342	12.5427	0.000397753	0.0106241	29.9043	4.53895e-08	3.28651e-06	small integral membrane protein 10 like 1 [Source:MGI Symbol;Acc:MGI:1914379]	6	133104909	133110899	1	protein_coding	4	Smim10l1	1753	1385	2470	2011	0.871706	0.688712	1.22824	0.69	0.71	1.23	1.27	small integral membrane protein 10 like 1	9.6e-06 ( 2.5e-07)	9.5e-01 (6.5e-01)	3.8e-02 (2.9e-03)	9.5e-01 (6.5e-01)
ENSMUSG00000023232	1.31745	0.251051	0.83426	30.374	2.53728e-07	9.8078e-06	1.53161	0.46496	0.710748	4.54836	0.0329503	0.17051	4.48674	0.0341587	0.178125	19.5613	9.74247e-06	0.000288029	serine incorporator 2 [Source:MGI Symbol;Acc:MGI:1919132]	4	130253495	130279205	-1	protein_coding	5	Serinc2	370	363	251	253	1.46245	1.43478	0.992095	1.43	1.47	0.99	1.02	serine incorporator 2	9.8e-06 ( 2.5e-07)	8.3e-01 (2.5e-01)	7.1e-01 (4.6e-01)	8.3e-01 (2.5e-01)
ENSMUSG00000028327	0.0999217	0.751924	0.966675	30.2328	2.72283e-07	1.0496e-05	5.07059	0.0792383	0.286962	5.85647	0.0155199	0.108056	5.48828	0.0191443	0.127171	21.6877	3.20836e-06	0.000115823	STRA6-like [Source:MGI Symbol;Acc:MGI:1921402]	4	45848664	45887008	1	protein_coding	5	Stra6l	3452	4393	2574	2257	1.52946	1.94639	1.14045	1.95	1.34	1.14	0.79	STRA6-like	1.0e-05 ( 2.7e-07)	9.7e-01 (7.5e-01)	2.9e-01 (7.9e-02)	9.7e-01 (7.5e-01)
ENSMUSG00000023055	0.586193	0.443895	0.910232	30.1524	2.83461e-07	1.0867e-05	8.63946	0.0133035	0.102189	2.60922	0.106244	0.335361	2.22201	0.136056	0.392246	6.4714	0.0109624	0.0615482	calcium binding and coiled coil domain 1 [Source:MGI Symbol;Acc:MGI:1914738]	15	102706777	102722178	-1	protein_coding	9	Calcoco1	637	762	888	1154	0.551993	0.660312	0.769497	0.66	0.72	0.77	0.84	calcium binding and coiled coil domain 1	1.1e-05 ( 2.8e-07)	9.1e-01 (4.4e-01)	1.0e-01 (1.3e-02)	9.1e-01 (4.4e-01)
ENSMUSG00000067889	2.42874	0.119129	0.723729	30.1549	2.83101e-07	1.0867e-05	2.5004	0.286447	0.564964	5.03692	0.0248125	0.143197	4.42504	0.0354154	0.181643	13.7512	0.000208683	0.00316248	spectrin beta, non-erythrocytic 2 [Source:MGI Symbol;Acc:MGI:1313261]	19	4711208	4752353	1	protein_coding	1	Sptbn2	1122	866	1296	1503	0.746507	0.576181	0.862275	0.58	0.87	0.86	1.3	spectrin beta, non-erythrocytic 2	1.1e-05 ( 2.8e-07)	7.2e-01 (1.2e-01)	5.6e-01 (2.9e-01)	7.2e-01 (1.2e-01)
ENSMUSG00000030083	2.11351	0.146004	0.763641	30.1202	2.88063e-07	1.10133e-05	2.14077	0.342876	0.620282	5.57644	0.0182037	0.118574	5.08576	0.0241231	0.145328	13.6818	0.00021654	0.00325576	ankyrin repeat and BTB (POZ) domain containing 1 [Source:MGI Symbol;Acc:MGI:1933148]	6	88835914	88841984	-1	protein_coding	12	Abtb1	524	599	777	775	0.676129	0.772903	1.00258	0.77	0.67	1	0.87	ankyrin repeat and BTB (POZ) domain containing 1	1.1e-05 ( 2.9e-07)	7.6e-01 (1.5e-01)	6.2e-01 (3.4e-01)	7.6e-01 (1.5e-01)
ENSMUSG00000010307	0.254885	0.613656	0.945642	30.1014	2.90774e-07	1.10867e-05	1.56054	0.458283	0.706405	5.63433	0.0176121	0.116149	5.12551	0.0235767	0.1435	15.3759	8.81064e-05	0.00165411	transmembrane protein 86A [Source:MGI Symbol;Acc:MGI:1915143]	7	47050601	47054777	1	protein_coding	2	Tmem86a	158	156	266	302	0.523179	0.516556	0.880795	0.52	0.59	0.88	1.01	transmembrane protein 86A	1.1e-05 ( 2.9e-07)	9.5e-01 (6.1e-01)	7.1e-01 (4.6e-01)	9.5e-01 (6.1e-01)
ENSMUSG00000053641	9.88029	0.00167058	0.142217	30.0715	2.95156e-07	1.12231e-05	15.6658	0.000396466	0.00980169	36.8541	1.27309e-09	4.27571e-07	31.8908	1.63085e-08	4.87278e-06	21.2915	3.94467e-06	0.000139183	DENN/MADD domain containing 4A [Source:MGI Symbol;Acc:MGI:2142979]	9	64811340	64919667	1	protein_coding	9	Dennd4a	436	666	435	392	1.11224	1.69898	1.10969	1.7	1	1.11	0.65	DENN/MADD domain containing 4A	1.1e-05 ( 3.0e-07)	1.4e-01 (1.7e-03)	9.8e-03 (4.0e-04)	1.4e-01 (1.7e-03)
ENSMUSG00000021366	0.947396	0.330383	0.868592	30.011	3.04221e-07	1.15365e-05	31.2237	1.65907e-07	2.73645e-05	13.9716	0.000185592	0.00586577	13.735	0.000210494	0.0071039	16.8913	3.95836e-05	0.000896569	human immunodeficiency virus type I enhancer binding protein 1 [Source:MGI Symbol;Acc:MGI:96100]	13	42052021	42192537	1	protein_coding	5	Hivep1	265	616	208	315	0.84127	1.95556	0.660317	1.96	1.27	0.66	0.43	human immunodeficiency virus type I enhancer binding protein 1	1.2e-05 ( 3.0e-07)	8.7e-01 (3.3e-01)	2.7e-05 (1.7e-07)	8.7e-01 (3.3e-01)
ENSMUSG00000024913	0.000278836	0.986677	0.997827	29.9821	3.08659e-07	1.16417e-05	9.07951	0.010676	0.0879281	15.9294	6.57504e-05	0.00283819	13.7603	0.000207678	0.00706155	30.1949	3.90726e-08	2.89604e-06	low density lipoprotein receptor-related protein 5 [Source:MGI Symbol;Acc:MGI:1278315]	19	3584828	3686564	-1	protein_coding	4	Lrp5	1205	1904	1022	1013	1.18954	1.87957	1.00888	1.88	1.18	1.01	0.63	low density lipoprotein receptor-related protein 5	1.2e-05 ( 3.1e-07)	1.0e+00 (9.9e-01)	8.8e-02 (1.1e-02)	1.0e+00 (9.9e-01)
ENSMUSG00000064215	0.740475	0.389509	0.892495	29.8864	3.23781e-07	1.21635e-05	4.71172	0.094812	0.316914	10.0264	0.00154308	0.0243673	8.88608	0.00287353	0.0388271	17.0955	3.5547e-05	0.000816999	interferon, alpha-inducible protein 27 [Source:MGI Symbol;Acc:MGI:1277180]	12	103434211	103440239	1	protein_coding	9	Ifi27	1390	1129	2114	1787	0.77784	0.631785	1.18299	0.63	0.66	1.18	1.23	interferon, alpha-inducible protein 27	1.2e-05 ( 3.2e-07)	8.9e-01 (3.9e-01)	3.2e-01 (9.5e-02)	8.9e-01 (3.9e-01)
ENSMUSG00000030269	0.918028	0.337993	0.871986	29.8836	3.24233e-07	1.21635e-05	4.10242	0.128579	0.371872	5.71406	0.0168295	0.113544	4.54308	0.033052	0.174666	13.0066	0.000310403	0.00428191	myotubularin related protein 14 [Source:MGI Symbol;Acc:MGI:1916075]	6	113237843	113281392	1	protein_coding	10	Mtmr14	435	449	507	681	0.638767	0.659325	0.744493	0.66	0.86	0.74	0.97	myotubularin related protein 14	1.2e-05 ( 3.2e-07)	8.7e-01 (3.4e-01)	3.7e-01 (1.3e-01)	8.7e-01 (3.4e-01)
ENSMUSG00000049502	6.57206	0.0103592	0.335825	29.8641	3.27404e-07	1.2217e-05	8.9748	0.0112498	0.0911874	18.2929	1.89408e-05	0.00118552	15.9136	6.63004e-05	0.00319951	27.6996	1.41689e-07	8.36022e-06	deltex 3-like, E3 ubiquitin ligase [Source:MGI Symbol;Acc:MGI:2656973]	16	35926511	35939151	-1	protein_coding	2	Dtx3l	681	506	754	865	0.787283	0.584971	0.871676	0.58	0.9	0.87	1.35	deltex 3-like, E3 ubiquitin ligase	1.2e-05 ( 3.3e-07)	3.4e-01 (1.0e-02)	9.1e-02 (1.1e-02)	3.4e-01 (1.0e-02)
ENSMUSG00000037287	0.0400564	0.84137	0.980687	29.8641	3.27406e-07	1.2217e-05	0.0486038	0.975991	0.988893	7.1756	0.00739019	0.0691794	6.17281	0.0129728	0.101548	14.4112	0.000146928	0.0024266	tubulin folding cofactor E-like [Source:MGI Symbol;Acc:MGI:1925543]	9	42412316	42507809	-1	protein_coding	8	Tbcel	1609	1615	1146	926	1.73758	1.74406	1.23758	1.74	1.4	1.24	1	tubulin folding cofactor E-like	1.2e-05 ( 3.3e-07)	9.8e-01 (8.4e-01)	9.9e-01 (9.8e-01)	9.8e-01 (8.4e-01)
ENSMUSG00000057228	0.148534	0.69994	0.958927	29.8365	3.31962e-07	1.23541e-05	5.48273	0.0644824	0.2546	16.3905	5.1542e-05	0.00240528	16.018	6.2743e-05	0.00305938	31.2548	2.26282e-08	1.7953e-06	aminoadipate aminotransferase [Source:MGI Symbol;Acc:MGI:1345167]	8	60505932	60545677	1	protein_coding	3	Aadat	1561	1457	2361	2195	0.711162	0.663781	1.07563	0.66	0.66	1.08	1.07	aminoadipate aminotransferase	1.2e-05 ( 3.3e-07)	9.6e-01 (7.0e-01)	2.5e-01 (6.4e-02)	9.6e-01 (7.0e-01)
ENSMUSG00000020015	0.108251	0.742144	0.965341	29.7798	3.41501e-07	1.26754e-05	5.10741	0.0777927	0.285575	12.8292	0.00034126	0.00883298	10.3097	0.00132333	0.0235719	24.0106	9.58077e-07	4.34009e-05	cyclin-dependent kinase 17 [Source:MGI Symbol;Acc:MGI:97517]	10	93160875	93267071	1	protein_coding	6	Cdk17	371	473	268	318	1.16667	1.48742	0.842767	1.49	1.38	0.84	0.78	cyclin-dependent kinase 17	1.3e-05 ( 3.4e-07)	9.7e-01 (7.4e-01)	2.9e-01 (7.8e-02)	9.7e-01 (7.4e-01)
ENSMUSG00000038884	2.64901	0.103614	0.697144	29.7534	3.46052e-07	1.28103e-05	3.19952	0.201945	0.469093	2.75353	0.0970399	0.31842	4.78994	0.0286265	0.16016	11.7802	0.000598636	0.00708227	RIKEN cDNA A230050P20 gene [Source:MGI Symbol;Acc:MGI:2441788]	9	20868642	20874307	1	protein_coding	5	A230050P20Rik	1648	1559	1046	1130	1.45841	1.37965	0.925664	1.38	1.58	0.93	1.06	RIKEN cDNA A230050P20 gene	1.3e-05 ( 3.5e-07)	7.0e-01 (1.0e-01)	4.7e-01 (2.0e-01)	7.0e-01 (1.0e-01)
ENSMUSG00000044134	0.125838	0.722787	0.963336	29.7333	3.49542e-07	1.29054e-05	3.23779	0.198117	0.464988	2.97774	0.0844169	0.292728	2.09144	0.148126	0.412235	8.01831	0.00463069	0.033161	family with sequence similarity 109, member A [Source:MGI Symbol;Acc:MGI:2442708]	5	121848984	121854632	1	protein_coding	3	Fam109a	137	183	253	330	0.415152	0.554545	0.766667	0.55	0.54	0.77	0.75	family with sequence similarity 109, member A	1.3e-05 ( 3.5e-07)	9.6e-01 (7.2e-01)	4.6e-01 (2.0e-01)	9.6e-01 (7.2e-01)
ENSMUSG00000073436	6.69336	0.00967729	0.323741	29.6863	3.57847e-07	1.31427e-05	7.68666	0.0214222	0.135294	0.777046	0.378046	0.663448	1.20196	0.272931	0.567956	7.72975	0.00543183	0.0371188	essential meiotic structure-specific endonuclease subunit 2 [Source:MGI Symbol;Acc:MGI:1919889]	17	24888486	24895087	-1	protein_coding	8	Eme2	391	292	183	250	1.564	1.168	0.732	1.17	2.14	0.73	1.34	essential meiotic structure-specific endonuclease subunit 2	1.3e-05 ( 3.6e-07)	3.2e-01 (9.7e-03)	1.4e-01 (2.1e-02)	3.2e-01 (9.7e-03)
ENSMUSG00000041828	0.403385	0.525346	0.929675	29.6384	3.66528e-07	1.34262e-05	16.0623	0.000325169	0.00846002	10.6738	0.00108666	0.0193825	11.2104	0.000813416	0.0171447	28.6791	8.54226e-08	5.5027e-06	ATP-binding cassette, sub-family A (ABC1), member 8a [Source:MGI Symbol;Acc:MGI:2386846]	11	110025634	110095978	-1	protein_coding	8	Abca8a	1345	782	1980	1435	0.937282	0.544948	1.37979	0.54	0.68	1.38	1.72	ATP-binding cassette, sub-family A (ABC1), member 8a	1.3e-05 ( 3.7e-07)	9.3e-01 (5.3e-01)	8.5e-03 (3.3e-04)	9.3e-01 (5.3e-01)
ENSMUSG00000024754	4.61686	0.0316592	0.495027	29.5424	3.8455e-07	1.40496e-05	5.91332	0.0519924	0.226161	14.1085	0.000172562	0.00557462	10.1756	0.00142308	0.0247331	23.4176	1.30381e-06	5.44922e-05	transmembrane protein 2 [Source:MGI Symbol;Acc:MGI:1890373]	19	21778342	21858327	1	protein_coding	2	Tmem2	324	389	251	207	1.56522	1.87923	1.21256	1.88	1.29	1.21	0.83	transmembrane protein 2	1.4e-05 ( 3.8e-07)	5.0e-01 (3.2e-02)	2.3e-01 (5.2e-02)	5.0e-01 (3.2e-02)
ENSMUSG00000018727	1.32872	0.249033	0.832087	29.5327	3.86415e-07	1.4081e-05	1.70835	0.425634	0.684036	10.4233	0.00124434	0.0213383	9.38449	0.00218828	0.0326568	31.3825	2.11879e-08	1.70024e-06	cleavage and polyadenylation specific factor 4-like [Source:MGI Symbol;Acc:MGI:1277182]	11	113698172	113710017	-1	protein_coding	5	Cpsf4l	115	86	143	222	0.518018	0.387387	0.644144	0.39	0.8	0.64	1.34	cleavage and polyadenylation specific factor 4-like	1.4e-05 ( 3.9e-07)	8.3e-01 (2.5e-01)	6.8e-01 (4.3e-01)	8.3e-01 (2.5e-01)
ENSMUSG00000025130	0.258007	0.611493	0.945252	29.5115	3.90526e-07	1.41938e-05	0.307106	0.857655	0.935279	4.62004	0.0316005	0.16602	4.25506	0.0391335	0.193059	11.1734	0.00082978	0.00906817	prolyl 4-hydroxylase, beta polypeptide [Source:MGI Symbol;Acc:MGI:97464]	11	120560298	120573253	-1	protein_coding	3	P4hb	52186	49048	37770	37436	1.39401	1.31018	1.00892	1.31	1.38	1.01	1.06	prolyl 4-hydroxylase, beta polypeptide	1.4e-05 ( 3.9e-07)	9.5e-01 (6.1e-01)	9.4e-01 (8.6e-01)	9.5e-01 (6.1e-01)
ENSMUSG00000067225	0.646861	0.421237	0.905798	29.4129	4.10262e-07	1.48341e-05	0.654413	0.720935	0.868393	3.69335	0.0546298	0.227542	3.10857	0.0778813	0.287309	14.5138	0.000139134	0.0023288	cytochrome P450, family 2, subfamily c, polypeptide 54 [Source:MGI Symbol;Acc:MGI:3642960]	19	40037941	40073811	-1	protein_coding	1	Cyp2c54	14198	17271	10429	6777	2.09503	2.54847	1.53888	2.55	1.36	1.54	0.82	cytochrome P450, family 2, subfamily c, polypeptide 54	1.5e-05 ( 4.1e-07)	9.1e-01 (4.2e-01)	8.7e-01 (7.2e-01)	9.1e-01 (4.2e-01)
ENSMUSG00000032633	1.72351	0.189242	0.788542	29.4072	4.11432e-07	1.48381e-05	1.78114	0.410421	0.672879	11.3978	0.000735313	0.0149365	9.35392	0.00222509	0.0331242	16.1893	5.73159e-05	0.0011889	folliculin [Source:MGI Symbol;Acc:MGI:2442184]	11	59791408	59810016	-1	protein_coding	6	Flcn	926	1128	738	624	1.48397	1.80769	1.18269	1.81	1.25	1.18	0.82	folliculin	1.5e-05 ( 4.1e-07)	7.9e-01 (1.9e-01)	6.7e-01 (4.1e-01)	7.9e-01 (1.9e-01)
ENSMUSG00000045868	0.444524	0.504947	0.924817	29.3757	4.17971e-07	1.50351e-05	9.20813	0.010011	0.084541	7.36511	0.00665015	0.063992	8.94549	0.00278155	0.0382954	13.5945	0.000226849	0.00336748	GTPase, very large interferon inducible 1 [Source:MGI Symbol;Acc:MGI:1921808]	7	106156556	106215326	-1	protein_coding	2	Gvin1	121	124	252	193	0.626943	0.642487	1.3057	0.64	0.48	1.31	0.98	GTPase, very large interferon inducible 1	1.5e-05 ( 4.2e-07)	9.2e-01 (5.0e-01)	8.5e-02 (1.0e-02)	9.2e-01 (5.0e-01)
ENSMUSG00000057963	0.228715	0.632478	0.947721	29.1979	4.56839e-07	1.63492e-05	2.68	0.261846	0.537798	5.64175	0.0175377	0.11588	5.55112	0.0184689	0.124872	13.9934	0.000183455	0.00288171	inositol 1,3,4-triphosphate 5/6 kinase [Source:MGI Symbol;Acc:MGI:2446159]	12	102568582	102704930	-1	protein_coding	5	Itpk1	489	551	334	357	1.36975	1.54342	0.935574	1.54	1.46	0.94	0.89	inositol 1,3,4-triphosphate 5/6 kinase	1.6e-05 ( 4.6e-07)	9.5e-01 (6.3e-01)	5.4e-01 (2.6e-01)	9.5e-01 (6.3e-01)
ENSMUSG00000006273	13.0658	0.000300734	0.0577967	29.1756	4.61948e-07	1.64899e-05	24.1707	5.64144e-06	0.000436744	32.4914	1.19719e-08	2.94381e-06	28.0547	1.17932e-07	2.62876e-05	13.5584	0.000231256	0.00342206	ATPase, H+ transporting, lysosomal V1 subunit B2 [Source:MGI Symbol;Acc:MGI:109618]	8	69088646	69113711	1	protein_coding	6	Atp6v1b2	849	1242	837	826	1.02785	1.50363	1.01332	1.5	1.01	1.01	0.68	ATPase, H+ transporting, lysosomal V1 subunit B2	1.6e-05 ( 4.6e-07)	5.8e-02 (3.0e-04)	4.4e-04 (5.6e-06)	5.8e-02 (3.0e-04)
ENSMUSG00000026502	1.95377	0.162181	0.769852	29.0124	5.01239e-07	1.77117e-05	2.99062	0.224179	0.495097	23.5852	1.19503e-06	0.000138282	21.8766	2.90758e-06	0.000295086	41.4242	1.22531e-10	2.12433e-08	desumoylating isopeptidase 2 [Source:MGI Symbol;Acc:MGI:1926075]	1	178187417	178257301	1	protein_coding	4	Desi2	483	522	368	315	1.53333	1.65714	1.16825	1.66	1.31	1.17	0.93	desumoylating isopeptidase 2	1.8e-05 ( 5.0e-07)	7.7e-01 (1.6e-01)	5.0e-01 (2.2e-01)	7.7e-01 (1.6e-01)
ENSMUSG00000032076	0.0913368	0.762485	0.969989	29.001	5.04107e-07	1.77682e-05	4.75008	0.0930108	0.314342	1.65779	0.197902	0.470653	1.59616	0.206448	0.489307	11.0434	0.000890022	0.00957261	cell adhesion molecule 1 [Source:MGI Symbol;Acc:MGI:1889272]	9	47530173	47857637	1	protein_coding	10	Cadm1	874	745	693	553	1.58047	1.3472	1.25316	1.35	1.26	1.25	1.17	cell adhesion molecule 1	1.8e-05 ( 5.0e-07)	9.7e-01 (7.6e-01)	3.1e-01 (9.3e-02)	9.7e-01 (7.6e-01)
ENSMUSG00000090958	1.14621	0.284343	0.851891	28.9817	5.08977e-07	1.78948e-05	17.7077	0.000142834	0.00493564	10.8125	0.00100818	0.0183813	12.0794	0.000509818	0.0125726	23.1723	1.48115e-06	6.02894e-05	leucine rich repeat containing 32 [Source:MGI Symbol;Acc:MGI:93882]	7	98489283	98502181	1	protein_coding	3	Lrrc32	360	464	194	286	1.25874	1.62238	0.678322	1.62	1.86	0.68	0.78	leucine rich repeat containing 32	1.8e-05 ( 5.1e-07)	8.5e-01 (2.8e-01)	4.9e-03 (1.4e-04)	8.5e-01 (2.8e-01)
ENSMUSG00000027367	0.709735	0.399532	0.896851	28.9459	5.18187e-07	1.81729e-05	6.66723	0.0356639	0.181207	8.41284	0.0037258	0.0438874	9.42449	0.00214107	0.0321229	28.0155	1.20349e-07	7.47815e-06	START domain containing 7 [Source:MGI Symbol;Acc:MGI:2139090]	2	127270218	127298932	1	protein_coding	8	Stard7	2185	1906	2840	2814	0.776475	0.677328	1.00924	0.68	0.77	1.01	1.15	START domain containing 7	1.8e-05 ( 5.2e-07)	9.0e-01 (4.0e-01)	1.8e-01 (3.6e-02)	9.0e-01 (4.0e-01)
ENSMUSG00000028261	0.350633	0.553755	0.935679	28.8996	5.30301e-07	1.85512e-05	4.67557	0.0965412	0.319967	10.6863	0.00107931	0.0193015	11.5315	0.00068427	0.0153747	27.2762	1.76366e-07	1.00591e-05	NADH dehydrogenase (ubiquinone) 1 alpha subcomplex, assembly factor 4 [Source:MGI Symbol;Acc:MGI:1915743]	4	24898083	24905001	1	protein_coding	3	Ndufaf4	690	520	751	825	0.836364	0.630303	0.910303	0.63	0.92	0.91	1.33	NADH dehydrogenase (ubiquinone) 1 alpha subcomplex, assembly factor 4	1.9e-05 ( 5.3e-07)	9.4e-01 (5.5e-01)	3.2e-01 (9.7e-02)	9.4e-01 (5.5e-01)
ENSMUSG00000026669	0.0455166	0.831057	0.980326	28.768	5.66367e-07	1.97144e-05	2.24544	0.325393	0.604394	6.22946	0.0125642	0.0947474	6.2657	0.0123098	0.0975541	27.1063	1.92571e-07	1.08171e-05	minichromosome maintenance 10 replication initiation factor [Source:MGI Symbol;Acc:MGI:1917274]	2	4989714	5012791	-1	protein_coding	10	Mcm10	1721	1583	3122	3052	0.563893	0.518676	1.02294	0.52	0.55	1.02	1.09	minichromosome maintenance 10 replication initiation factor	2.0e-05 ( 5.7e-07)	9.8e-01 (8.3e-01)	6.0e-01 (3.3e-01)	9.8e-01 (8.3e-01)
ENSMUSG00000067825	0.0105235	0.918293	0.989392	28.7519	5.70959e-07	1.98249e-05	0.986728	0.610569	0.805392	5.13112	0.0235005	0.138235	4.25094	0.0392285	0.193429	23.9789	9.73981e-07	4.36985e-05	peroxisomal biogenesis factor 26 [Source:MGI Symbol;Acc:MGI:1921293]	6	121183667	121198837	1	protein_coding	6	Pex26	418	445	665	707	0.591231	0.62942	0.940594	0.63	0.63	0.94	0.94	peroxisomal biogenesis factor 26	2.0e-05 ( 5.7e-07)	9.9e-01 (9.2e-01)	8.1e-01 (6.1e-01)	9.9e-01 (9.2e-01)
ENSMUSG00000020778	4.27263	0.0387309	0.531838	28.5685	6.25788e-07	2.16749e-05	7.6346	0.021987	0.137281	28.3785	9.97666e-08	1.92327e-05	24.7774	6.43492e-07	0.000103868	33.47	7.23707e-09	6.73047e-07	TEN1 telomerase capping complex subunit [Source:MGI Symbol;Acc:MGI:1916785]	11	116198855	116215318	1	protein_coding	4	Ten1	72	34	75	103	0.699029	0.330097	0.728155	0.33	0.96	0.73	2.12	TEN1 telomerase capping complex subunit	2.2e-05 ( 6.3e-07)	5.3e-01 (3.9e-02)	1.4e-01 (2.2e-02)	5.3e-01 (3.9e-02)
ENSMUSG00000054827	0.597981	0.439349	0.908473	28.4889	6.51184e-07	2.24988e-05	2.37499	0.304984	0.583011	8.41467	0.00372206	0.0438807	7.45967	0.00630966	0.0648049	16.7043	4.36818e-05	0.000958473	cytochrome P450, family 2, subfamily c, polypeptide 50 [Source:MGI Symbol;Acc:MGI:2147497]	19	40089688	40113950	1	protein_coding	3	Cyp2c50	26608	35231	19549	17016	1.5637	2.07046	1.14886	2.07	1.36	1.15	0.76	cytochrome P450, family 2, subfamily c, polypeptide 50	2.2e-05 ( 6.5e-07)	9.1e-01 (4.4e-01)	5.8e-01 (3.0e-01)	9.1e-01 (4.4e-01)
ENSMUSG00000023852	12.9078	0.000327213	0.0610241	28.3586	6.9505e-07	2.39552e-05	25.2436	3.29933e-06	0.000280176	39.8555	2.73457e-10	1.21468e-07	31.6241	1.87095e-08	5.36198e-06	20.6925	5.39281e-06	0.000179454	chromodomain helicase DNA binding protein 1 [Source:MGI Symbol;Acc:MGI:88393]	17	15704967	15772610	1	protein_coding	5	Chd1	440	849	482	482	0.912863	1.76141	1	1.76	0.91	1	0.52	chromodomain helicase DNA binding protein 1	2.4e-05 ( 7.0e-07)	6.1e-02 (3.3e-04)	2.8e-04 (3.3e-06)	6.1e-02 (3.3e-04)
ENSMUSG00000025197	0.0296555	0.863274	0.984744	28.3295	7.05221e-07	2.42461e-05	0.67186	0.714673	0.864257	2.11722	0.145651	0.402572	2.06724	0.150494	0.416079	10.0308	0.00153948	0.0145582	cytochrome P450, family 2, subfamily c, polypeptide 23 [Source:MGI Symbol;Acc:MGI:1888897]	19	44005022	44029208	-1	protein_coding	2	Cyp2c23	4881	5466	7590	8697	0.561228	0.628493	0.872715	0.63	0.64	0.87	0.89	cytochrome P450, family 2, subfamily c, polypeptide 23	2.4e-05 ( 7.1e-07)	9.8e-01 (8.6e-01)	8.6e-01 (7.1e-01)	9.8e-01 (8.6e-01)
ENSMUSG00000040466	0.0508278	0.821629	0.979456	28.2879	7.20061e-07	2.46956e-05	0.928379	0.628644	0.81663	2.19722	0.13826	0.392018	2.09649	0.147638	0.411609	11.4577	0.000711991	0.00802998	biliverdin reductase B (flavin reductase (NADPH)) [Source:MGI Symbol;Acc:MGI:2385271]	7	27447978	27466144	1	protein_coding	6	Blvrb	8808	8041	6141	3803	2.31607	2.11438	1.61478	2.11	1.43	1.61	1.1	biliverdin reductase B (flavin reductase (NADPH))	2.5e-05 ( 7.2e-07)	9.8e-01 (8.2e-01)	8.2e-01 (6.3e-01)	9.8e-01 (8.2e-01)
ENSMUSG00000027800	4.57394	0.0324618	0.502239	28.2228	7.43886e-07	2.54503e-05	4.5742	0.101561	0.329425	2.21611	0.136577	0.389452	2.53323	0.111472	0.352938	9.76387	0.00177975	0.0161767	transmembrane 4 superfamily member 1 [Source:MGI Symbol;Acc:MGI:104678]	3	57285611	57301988	-1	protein_coding	6	Tm4sf1	294	273	184	200	1.47	1.365	0.92	1.36	1.6	0.92	1.08	transmembrane 4 superfamily member 1	2.5e-05 ( 7.4e-07)	5.0e-01 (3.2e-02)	3.3e-01 (1.0e-01)	5.0e-01 (3.2e-02)
ENSMUSG00000052562	4.44803	0.0349415	0.514919	28.1694	7.64001e-07	2.60748e-05	15.7657	0.000377155	0.00953065	13.0557	0.000302357	0.00807884	12.2345	0.000469142	0.0118706	22.7601	1.8354e-06	7.28096e-05	solute carrier family 22, member 30 [Source:MGI Symbol;Acc:MGI:2442750]	19	8335371	8405111	-1	protein_coding	3	Slc22a30	2958	1720	3072	3328	0.888822	0.516827	0.923077	0.52	0.96	0.92	1.72	solute carrier family 22, member 30	2.6e-05 ( 7.6e-07)	5.1e-01 (3.5e-02)	9.5e-03 (3.8e-04)	5.1e-01 (3.5e-02)
ENSMUSG00000050069	0.414278	0.519806	0.9286	28.1381	7.76036e-07	2.64211e-05	2.19977	0.33291	0.610298	3.83478	0.0501995	0.216353	4.3484	0.0370438	0.186856	14.4226	0.000146043	0.00242598	gremlin 2, DAN family BMP antagonist [Source:MGI Symbol;Acc:MGI:1344367]	1	174833785	174921819	-1	protein_coding	1	Grem2	145	134	273	284	0.510563	0.471831	0.961268	0.47	0.53	0.96	1.08	gremlin 2, DAN family BMP antagonist	2.6e-05 ( 7.8e-07)	9.3e-01 (5.2e-01)	6.1e-01 (3.3e-01)	9.3e-01 (5.2e-01)
ENSMUSG00000032606	0.248248	0.618311	0.946136	28.0669	8.04157e-07	2.73121e-05	3.7124	0.156265	0.412103	2.11028	0.146313	0.403651	1.75101	0.18575	0.46466	8.7635	0.00307318	0.024661	nicolin 1 [Source:MGI Symbol;Acc:MGI:1913507]	9	108290429	108296498	1	protein_coding	4	Nicn1	446	371	309	273	1.6337	1.35897	1.13187	1.36	1.44	1.13	1.2	nicolin 1	2.7e-05 ( 8.0e-07)	9.5e-01 (6.2e-01)	4.1e-01 (1.6e-01)	9.5e-01 (6.2e-01)
ENSMUSG00000078619	1.63463	0.201064	0.80009	28.0023	8.3059e-07	2.81415e-05	4.21208	0.121719	0.362896	5.47441	0.0192968	0.122606	4.31746	0.0377232	0.188522	8.89335	0.00286212	0.0232462	SWI/SNF related, matrix associated, actin dependent regulator of chromatin, subfamily d, member 2 [Source:MGI Symbol;Acc:MGI:1933621]	11	106263179	106272972	-1	protein_coding	9	Smarcd2	1423	1351	1554	2066	0.688771	0.653921	0.752178	0.65	0.92	0.75	1.05	SWI/SNF related, matrix associated, actin dependent regulator of chromatin, subfamily d, member 2	2.8e-05 ( 8.3e-07)	8.0e-01 (2.0e-01)	3.6e-01 (1.2e-01)	8.0e-01 (2.0e-01)
ENSMUSG00000029416	22.1056	2.58057e-06	0.00245647	27.9712	8.4357e-07	2.85123e-05	23.8119	6.75015e-06	0.000507822	15.3977	8.70958e-05	0.00339748	12.9216	0.000324814	0.0093273	6.36106	0.0116652	0.0642276	solute carrier family 15, member 4 [Source:MGI Symbol;Acc:MGI:2140796]	5	127595664	127632897	-1	protein_coding	11	Slc15a4	739	1220	959	662	1.11631	1.8429	1.44864	1.84	0.77	1.45	0.61	solute carrier family 15, member 4	2.9e-05 ( 8.4e-07)	2.5e-03 (2.6e-06)	5.1e-04 (6.8e-06)	2.5e-03 (2.6e-06)
ENSMUSG00000027358	0.0355961	0.850352	0.981331	27.8618	8.91034e-07	2.99508e-05	0.935913	0.626281	0.814893	11.398	0.000735217	0.0149365	10.3633	0.00128545	0.0232623	26.2643	2.97735e-07	1.62058e-05	bone morphogenetic protein 2 [Source:MGI Symbol;Acc:MGI:88177]	2	133552159	133562885	1	protein_coding	1	Bmp2	683	747	469	522	1.30843	1.43103	0.898467	1.43	1.46	0.9	0.91	bone morphogenetic protein 2	3.0e-05 ( 8.9e-07)	9.8e-01 (8.5e-01)	8.1e-01 (6.3e-01)	9.8e-01 (8.5e-01)
ENSMUSG00000006715	1.48035	0.223719	0.819332	27.7003	9.65959e-07	3.23365e-05	2.06944	0.355326	0.629302	13.1851	0.000282182	0.00774032	11.9865	0.000535875	0.0130195	17.6463	2.66035e-05	0.000645239	geminin [Source:MGI Symbol;Acc:MGI:1927344]	13	24751845	24761923	-1	protein_coding	5	Gmnn	152	109	186	277	0.548736	0.393502	0.67148	0.39	0.82	0.67	1.39	geminin	3.2e-05 ( 9.7e-07)	8.2e-01 (2.2e-01)	6.3e-01 (3.6e-01)	8.2e-01 (2.2e-01)
ENSMUSG00000052684	1.6178	0.203399	0.80192	27.6628	9.84257e-07	3.28704e-05	17.4412	0.000163192	0.00538571	17.0306	3.67827e-05	0.00187289	14.0574	0.00017731	0.00630372	16.3039	5.39514e-05	0.00113485	jun proto-oncogene [Source:MGI Symbol;Acc:MGI:96646]	4	95049034	95052222	-1	protein_coding	1	Jun	893	1807	437	583	1.53173	3.09949	0.749571	3.1	2.04	0.75	0.49	jun proto-oncogene	3.3e-05 ( 9.8e-07)	8.0e-01 (2.0e-01)	5.4e-03 (1.6e-04)	8.0e-01 (2.0e-01)
ENSMUSG00000023022	1.62049	0.203024	0.80192	27.6476	9.91766e-07	3.30423e-05	1.62089	0.44466	0.697467	12.4974	0.000407522	0.0100386	10.458	0.00122121	0.0225205	17.9796	2.23285e-05	0.000558928	LIM domain and actin binding 1 [Source:MGI Symbol;Acc:MGI:1920992]	15	99778470	99875456	-1	protein_coding	6	Lima1	1702	1770	1337	1075	1.58326	1.64651	1.24372	1.65	1.27	1.24	0.96	LIM domain and actin binding 1	3.3e-05 ( 9.9e-07)	8.0e-01 (2.0e-01)	7.0e-01 (4.4e-01)	8.0e-01 (2.0e-01)
ENSMUSG00000032411	6.21984	0.0126327	0.360426	27.6349	9.98067e-07	3.31733e-05	15.6747	0.000394711	0.00977556	0.00243962	0.960607	0.986763	9.94526e-05	0.992043	0.996685	2.07939	0.1493	0.354699	transcription factor Dp 2 [Source:MGI Symbol;Acc:MGI:107167]	9	96196275	96323646	1	protein_coding	16	Tfdp2	250	365	410	441	0.566893	0.827664	0.929705	0.83	0.61	0.93	0.68	transcription factor Dp 2	3.3e-05 ( 1.0e-06)	3.6e-01 (1.3e-02)	9.8e-03 (3.9e-04)	3.6e-01 (1.3e-02)
ENSMUSG00000015312	0.424804	0.51455	0.927788	27.6143	1.00841e-06	3.34377e-05	9.18996	0.0101024	0.085056	11.1437	0.000843179	0.0163529	10.6593	0.00109518	0.0209817	19.6131	9.48153e-06	0.000282096	growth arrest and DNA-damage-inducible 45 beta [Source:MGI Symbol;Acc:MGI:107776]	10	80930073	80932204	1	protein_coding	3	Gadd45b	219	729	61	53	4.13208	13.7547	1.15094	13.75	3.59	1.15	0.3	growth arrest and DNA-damage-inducible 45 beta	3.3e-05 ( 1.0e-06)	9.3e-01 (5.1e-01)	8.5e-02 (1.0e-02)	9.3e-01 (5.1e-01)
ENSMUSG00000022204	7.09408	0.0077339	0.299932	27.5071	1.06392e-06	3.51608e-05	7.31853	0.0257515	0.151276	15.631	7.69833e-05	0.00318336	12.4202	0.000424712	0.0110466	17.9256	2.29712e-05	0.000571957	neuroguidin, EIF4E binding protein [Source:MGI Symbol;Acc:MGI:1916216]	14	55015454	55024137	1	protein_coding	4	Ngdn	584	749	584	462	1.26407	1.62121	1.26407	1.62	1	1.26	0.78	neuroguidin, EIF4E binding protein	3.5e-05 ( 1.1e-06)	3.0e-01 (7.7e-03)	1.5e-01 (2.6e-02)	3.0e-01 (7.7e-03)
ENSMUSG00000020777	0.208326	0.648082	0.948095	27.5043	1.0654e-06	3.51608e-05	4.79602	0.0908988	0.310122	8.28917	0.00398822	0.0459	8.72573	0.0031375	0.0409098	27.9707	1.23166e-07	7.58606e-06	acyl-Coenzyme A oxidase 1, palmitoyl [Source:MGI Symbol;Acc:MGI:1330812]	11	116171888	116199045	-1	protein_coding	7	Acox1	41471	36349	57222	54894	0.755474	0.662167	1.04241	0.66	0.72	1.04	1.14	acyl-Coenzyme A oxidase 1, palmitoyl	3.5e-05 ( 1.1e-06)	9.5e-01 (6.5e-01)	3.1e-01 (9.1e-02)	9.5e-01 (6.5e-01)
ENSMUSG00000071757	6.51855	0.0106755	0.338737	27.4704	1.08365e-06	3.56697e-05	11.8508	0.00267078	0.0363542	40.7952	1.69049e-10	8.3136e-08	34.9682	3.35129e-09	1.34463e-06	28.8235	7.92816e-08	5.17838e-06	zinc fingers and homeoboxes 2 [Source:MGI Symbol;Acc:MGI:2683087]	15	57694665	57839832	1	protein_coding	2	Zhx2	336	509	331	304	1.10526	1.67434	1.08882	1.67	1.02	1.09	0.66	zinc fingers and homeoboxes 2	3.6e-05 ( 1.1e-06)	3.4e-01 (1.1e-02)	3.6e-02 (2.7e-03)	3.4e-01 (1.1e-02)
ENSMUSG00000018166	4.39465	0.0360519	0.521286	27.4662	1.08592e-06	3.56697e-05	5.58537	0.0612567	0.247307	1.30801	0.252755	0.536856	1.3416	0.246753	0.539407	5.98446	0.0144324	0.0739959	erb-b2 receptor tyrosine kinase 3 [Source:MGI Symbol;Acc:MGI:95411]	10	128567523	128589652	-1	protein_coding	1	Erbb3	1765	2184	2606	2792	0.632163	0.782235	0.933381	0.78	0.68	0.93	0.81	erb-b2 receptor tyrosine kinase 3	3.6e-05 ( 1.1e-06)	5.2e-01 (3.6e-02)	2.5e-01 (6.1e-02)	5.2e-01 (3.6e-02)
ENSMUSG00000042349	0.868198	0.351455	0.882159	27.4583	1.09022e-06	3.57271e-05	1.3631	0.505833	0.738304	0.428337	0.512806	0.761741	0.434801	0.509642	0.765321	8.57162	0.00341443	0.0266475	inhibitor of kappaB kinase epsilon [Source:MGI Symbol;Acc:MGI:1929612]	1	131254343	131279606	-1	protein_coding	7	Ikbke	544	457	266	275	1.97818	1.66182	0.967273	1.66	2.05	0.97	1.19	inhibitor of kappaB kinase epsilon	3.6e-05 ( 1.1e-06)	8.8e-01 (3.5e-01)	7.4e-01 (5.1e-01)	8.8e-01 (3.5e-01)
ENSMUSG00000029003	0.761246	0.382939	0.889278	27.4115	1.11599e-06	3.64861e-05	0.811498	0.666477	0.83724	4.19666	0.0405037	0.191005	4.03843	0.0444752	0.207953	19.7292	8.92283e-06	0.000270379	MAD2 mitotic arrest deficient-like 2 [Source:MGI Symbol;Acc:MGI:1919140]	4	148130384	148145699	1	protein_coding	8	Mad2l2	355	342	245	258	1.37597	1.32558	0.949612	1.33	1.45	0.95	1.04	MAD2 mitotic arrest deficient-like 2	3.6e-05 ( 1.1e-06)	8.9e-01 (3.8e-01)	8.4e-01 (6.7e-01)	8.9e-01 (3.8e-01)
ENSMUSG00000023952	5.8894	0.0152323	0.386777	27.4001	1.12241e-06	3.66103e-05	25.6314	2.71775e-06	0.000246945	66.0531	4.38937e-16	6.71574e-13	76.852	1.84261e-18	5.17514e-15	36.0247	1.94833e-09	2.10465e-07	GTP binding protein 2 [Source:MGI Symbol;Acc:MGI:1860138]	17	46161032	46169370	1	protein_coding	17	Gtpbp2	771	1496	714	777	0.992278	1.92535	0.918919	1.93	1.08	0.92	0.52	GTP binding protein 2	3.7e-05 ( 1.1e-06)	3.9e-01 (1.5e-02)	2.5e-04 (2.7e-06)	3.9e-01 (1.5e-02)
ENSMUSG00000042462	0.0227239	0.880177	0.98478	27.38	1.13374e-06	3.6894e-05	6.96659	0.030706	0.166609	10.9506	0.000935708	0.0174778	10.9997	0.00091126	0.0184534	23.2733	1.40534e-06	5.7537e-05	dCTP pyrophosphatase 1 [Source:MGI Symbol;Acc:MGI:1913672]	7	127256959	127260709	-1	protein_coding	1	Dctpp1	991	778	1243	1146	0.864747	0.678883	1.08464	0.68	0.8	1.08	1.27	dCTP pyrophosphatase 1	3.7e-05 ( 1.1e-06)	9.8e-01 (8.8e-01)	1.7e-01 (3.1e-02)	9.8e-01 (8.8e-01)
ENSMUSG00000024694	6.95687	0.0083498	0.313372	27.3413	1.1559e-06	3.75279e-05	23.6757	7.22566e-06	0.000540688	21.1747	4.19268e-06	0.000360833	21.9106	2.85657e-06	0.000292809	24.0134	9.56659e-07	4.34009e-05	kidney expressed gene 1 [Source:MGI Symbol;Acc:MGI:1928492]	19	12695786	12719902	1	protein_coding	7	Keg1	2458	692	2988	2603	0.944295	0.265847	1.14791	0.27	0.82	1.15	3.55	kidney expressed gene 1	3.8e-05 ( 1.2e-06)	3.1e-01 (8.3e-03)	5.4e-04 (7.2e-06)	3.1e-01 (8.3e-03)
ENSMUSG00000107002	0.0501314	0.822835	0.979456	27.3085	1.17497e-06	3.80585e-05	1.80371	0.405816	0.669249	12.7925	0.00034802	0.00895746	11.3138	0.000769319	0.0166482	28.9367	7.47806e-08	4.93026e-06	RIKEN cDNA 0610012G03 gene [Source:MGI Symbol;Acc:MGI:1913301]	16	31947050	31948494	-1	protein_coding	1	0610012G03Rik	785	576	1071	1046	0.750478	0.550669	1.0239	0.55	0.73	1.02	1.36	RIKEN cDNA 0610012G03 gene	3.8e-05 ( 1.2e-06)	9.8e-01 (8.2e-01)	6.7e-01 (4.1e-01)	9.8e-01 (8.2e-01)
ENSMUSG00000041567	14.9776	0.000108795	0.0309595	27.2217	1.22712e-06	3.95416e-05	15.8167	0.000367658	0.00938802	9.15008	0.00248708	0.0334613	7.75493	0.0053566	0.0577373	8.32469	0.00391098	0.029433	serine (or cysteine) peptidase inhibitor, clade A (alpha-1 antiproteinase, antitrypsin), member 12 [Source:MGI Symbol;Acc:MGI:1915304]	12	104028769	104044443	-1	protein_coding	1	Serpina12	1516	534	1516	2468	0.614263	0.21637	0.614263	0.22	1	0.61	2.84	serine (or cysteine) peptidase inhibitor, clade A (alpha-1 antiproteinase, antitrypsin), member 12	4.0e-05 ( 1.2e-06)	3.1e-02 (1.1e-04)	9.4e-03 (3.7e-04)	3.1e-02 (1.1e-04)
ENSMUSG00000022041	4.03866	0.0444692	0.560954	27.2182	1.22923e-06	3.95416e-05	6.5413	0.0379817	0.188201	11.6089	0.000656381	0.0139696	9.24772	0.00235789	0.0345275	24.0269	9.49983e-07	4.33137e-05	cholinergic receptor, nicotinic, alpha polypeptide 2 (neuronal) [Source:MGI Symbol;Acc:MGI:87886]	14	66135039	66152948	1	protein_coding	2	Chrna2	135	60	151	218	0.619266	0.275229	0.692661	0.28	0.89	0.69	2.25	cholinergic receptor, nicotinic, alpha polypeptide 2 (neuronal)	4.0e-05 ( 1.2e-06)	5.6e-01 (4.4e-02)	1.9e-01 (3.8e-02)	5.6e-01 (4.4e-02)
ENSMUSG00000001891	0.448976	0.502821	0.924817	27.1931	1.24479e-06	3.99504e-05	2.01698	0.36477	0.636952	4.74779	0.029336	0.157365	4.13923	0.0419001	0.200615	9.78108	0.00176317	0.016078	UDP-glucose pyrophosphorylase 2 [Source:MGI Symbol;Acc:MGI:2183447]	11	21321138	21371201	-1	protein_coding	4	Ugp2	14129	14466	10520	8106	1.74303	1.7846	1.2978	1.78	1.34	1.3	0.98	UDP-glucose pyrophosphorylase 2	4.0e-05 ( 1.2e-06)	9.2e-01 (5.0e-01)	6.4e-01 (3.6e-01)	9.2e-01 (5.0e-01)
ENSMUSG00000026718	4.49695	0.0339554	0.508651	27.1354	1.28124e-06	4.10262e-05	4.87517	0.0873716	0.304127	21.3905	3.74624e-06	0.000330678	18.8824	1.39032e-05	0.000961785	20.2733	6.71298e-06	0.000215722	signal transducing adaptor molecule (SH3 domain and ITAM motif) 1 [Source:MGI Symbol;Acc:MGI:1329014]	2	14074098	14149634	1	protein_coding	9	Stam	357	421	322	244	1.46311	1.72541	1.31967	1.73	1.11	1.32	0.85	signal transducing adaptor molecule (SH3 domain and ITAM motif) 1	4.1e-05 ( 1.3e-06)	5.1e-01 (3.4e-02)	3.0e-01 (8.7e-02)	5.1e-01 (3.4e-02)
ENSMUSG00000006241	0.412981	0.52046	0.9286	27.113	1.29562e-06	4.13919e-05	2.85877	0.239456	0.513357	0.597118	0.43968	0.708548	0.446194	0.504148	0.762329	7.47314	0.00626262	0.0410579	coiled-coil domain containing 159 [Source:MGI Symbol;Acc:MGI:1914369]	9	21927471	21935872	1	protein_coding	5	Ccdc159	134	109	57	50	2.68	2.18	1.14	2.18	2.35	1.14	1.23	coiled-coil domain containing 159	4.1e-05 ( 1.3e-06)	9.3e-01 (5.2e-01)	5.1e-01 (2.4e-01)	9.3e-01 (5.2e-01)
ENSMUSG00000032594	3.20162	0.0735652	0.630023	27.0985	1.30506e-06	4.15983e-05	5.26198	0.0720073	0.271883	1.32936	0.24892	0.53224	1.2196	0.26944	0.564485	7.73581	0.00541364	0.037053	inositol hexaphosphate kinase 1 [Source:MGI Symbol;Acc:MGI:1351633]	9	108002501	108048782	1	protein_coding	10	Ip6k1	1103	1297	1433	1584	0.696338	0.818813	0.904672	0.82	0.77	0.9	0.85	inositol hexaphosphate kinase 1	4.2e-05 ( 1.3e-06)	6.3e-01 (7.4e-02)	2.7e-01 (7.2e-02)	6.3e-01 (7.4e-02)
ENSMUSG00000078689	2.79964	0.0942854	0.673544	27.0701	1.32373e-06	4.20977e-05	7.62849	0.0220543	0.137343	23.3041	1.38307e-06	0.000154027	20.7439	5.24998e-06	0.000472599	23.833	1.05066e-06	4.6544e-05	major urinary protein 6 [Source:MGI Symbol;Acc:MGI:3650962]	4	59964294	60007274	1	protein_coding	3	Mup6	792	343	1423	1346	0.58841	0.254829	1.05721	0.25	0.56	1.06	2.31	major urinary protein 6	4.2e-05 ( 1.3e-06)	6.7e-01 (9.4e-02)	1.4e-01 (2.2e-02)	6.7e-01 (9.4e-02)
ENSMUSG00000068220	0.917764	0.338063	0.871986	27.0373	1.34562e-06	4.26968e-05	1.9538	0.376476	0.645732	1.97125	0.160315	0.42185	1.91809	0.166067	0.440607	4.75088	0.0292834	0.121467	lectin, galactose binding, soluble 1 [Source:MGI Symbol;Acc:MGI:96777]	15	78926725	78930465	1	protein_coding	2	Lgals1	1483	1062	928	670	2.21343	1.58507	1.38507	1.59	1.6	1.39	1.4	lectin, galactose binding, soluble 1	4.3e-05 ( 1.3e-06)	8.7e-01 (3.4e-01)	6.5e-01 (3.8e-01)	8.7e-01 (3.4e-01)
ENSMUSG00000020027	0.0384192	0.844604	0.980772	27.0126	1.36233e-06	4.3129e-05	1.93715	0.379623	0.647576	5.8922	0.0152081	0.106464	4.57883	0.0323693	0.172503	13.7773	0.000205807	0.00314832	suppressor of cytokine signaling 2 [Source:MGI Symbol;Acc:MGI:1201787]	10	95385362	95417180	-1	protein_coding	14	Socs2	100	177	237	773	0.129366	0.228978	0.306598	0.23	0.42	0.31	0.56	suppressor of cytokine signaling 2	4.3e-05 ( 1.4e-06)	9.8e-01 (8.4e-01)	6.5e-01 (3.8e-01)	9.8e-01 (8.4e-01)
ENSMUSG00000028019	0.0183179	0.89234	0.987468	26.9025	1.43944e-06	4.53649e-05	1.71466	0.424293	0.682978	1.77056	0.183313	0.453409	1.33038	0.248738	0.542058	7.44151	0.00637365	0.041611	platelet-derived growth factor, C polypeptide [Source:MGI Symbol;Acc:MGI:1859631]	3	81036416	81214040	1	protein_coding	3	Pdgfc	127	101	77	56	2.26786	1.80357	1.375	1.8	1.65	1.38	1.26	platelet-derived growth factor, C polypeptide	4.5e-05 ( 1.4e-06)	9.9e-01 (8.9e-01)	6.8e-01 (4.2e-01)	9.9e-01 (8.9e-01)
ENSMUSG00000064294	3.97376	0.0462146	0.566642	26.7796	1.53066e-06	4.80916e-05	17.4456	0.000162833	0.00538571	12.5323	0.000399984	0.00994184	12.2458	0.000466314	0.0118631	16.7786	4.20051e-05	0.000934829	aldehyde oxidase 3 [Source:MGI Symbol;Acc:MGI:1918974]	1	58113130	58200698	1	protein_coding	5	Aox3	6944	4009	7145	7652	0.907475	0.523915	0.933743	0.52	0.97	0.93	1.73	aldehyde oxidase 3	4.8e-05 ( 1.5e-06)	5.7e-01 (4.6e-02)	5.4e-03 (1.6e-04)	5.7e-01 (4.6e-02)
ENSMUSG00000041126	0.506274	0.476756	0.915782	26.7768	1.53283e-06	4.80916e-05	0.881842	0.643444	0.824907	4.44721	0.0349584	0.175813	4.36644	0.0366535	0.185487	17.3801	3.06007e-05	0.000720996	H2A histone family, member V [Source:MGI Symbol;Acc:MGI:1924855]	11	6427229	6444443	-1	protein_coding	2	H2afv	685	699	1044	1150	0.595652	0.607826	0.907826	0.61	0.66	0.91	0.98	H2A histone family, member V	4.8e-05 ( 1.5e-06)	9.2e-01 (4.8e-01)	8.2e-01 (6.4e-01)	9.2e-01 (4.8e-01)
ENSMUSG00000022864	16.093	6.03053e-05	0.0217744	26.7686	1.5391e-06	4.81804e-05	27.2918	1.18484e-06	0.000131583	23.4213	1.30133e-06	0.00014715	22.9696	1.64585e-06	0.000204537	12.7896	0.000348547	0.0046527	DNA segment, Chr 16, ERATO Doi 472, expressed [Source:MGI Symbol;Acc:MGI:1196400]	16	78540338	78576708	-1	protein_coding	8	D16Ertd472e	209	425	218	190	1.1	2.23684	1.14737	2.24	0.96	1.15	0.49	DNA segment, Chr 16, ERATO Doi 472, expressed	4.8e-05 ( 1.5e-06)	2.2e-02 (6.0e-05)	1.3e-04 (1.2e-06)	2.2e-02 (6.0e-05)
ENSMUSG00000026566	0.784656	0.375721	0.888171	26.6695	1.6173e-06	5.05155e-05	0.929152	0.628401	0.816531	3.1903	0.0740764	0.269807	3.34418	0.0674432	0.265073	33.2765	7.99446e-09	7.29001e-07	myelin protein zero-like 1 [Source:MGI Symbol;Acc:MGI:1915731]	1	165592240	165634538	-1	protein_coding	12	Mpzl1	147	161	75	65	2.26154	2.47692	1.15385	2.48	1.96	1.15	0.91	myelin protein zero-like 1	5.1e-05 ( 1.6e-06)	8.9e-01 (3.8e-01)	8.2e-01 (6.3e-01)	8.9e-01 (3.8e-01)
ENSMUSG00000022892	0.139765	0.708515	0.960495	26.6284	1.65092e-06	5.14505e-05	0.143612	0.930711	0.969006	13.742	0.000209707	0.00627754	12.4542	0.000417045	0.0109673	53.9679	2.0379e-13	7.46171e-11	amyloid beta (A4) precursor protein [Source:MGI Symbol;Acc:MGI:88059]	16	84949685	85173766	-1	protein_coding	11	App	1569	1739	1199	1069	1.46773	1.62675	1.12161	1.63	1.31	1.12	0.9	amyloid beta (A4) precursor protein	5.1e-05 ( 1.7e-06)	9.6e-01 (7.1e-01)	9.7e-01 (9.3e-01)	9.6e-01 (7.1e-01)
ENSMUSG00000062410	8.1108	0.00440022	0.235199	26.5361	1.72889e-06	5.37607e-05	32.8028	7.53284e-08	1.48461e-05	17.0075	3.72324e-05	0.00187799	18.862	1.40524e-05	0.000967345	10.4971	0.00119565	0.0119978	hydroxy-delta-5-steroid dehydrogenase, 3 beta- and steroid delta-isomerase 3 [Source:MGI Symbol;Acc:MGI:96235]	3	98741523	98763127	-1	protein_coding	6	Hsd3b3	4514	2275	4514	4357	1.03603	0.522148	1.03603	0.52	1	1.04	1.98	hydroxy-delta-5-steroid dehydrogenase, 3 beta- and steroid delta-isomerase 3	5.4e-05 ( 1.7e-06)	2.4e-01 (4.4e-03)	1.5e-05 (7.5e-08)	2.4e-01 (4.4e-03)
ENSMUSG00000028437	3.34405	0.0674485	0.618258	26.5285	1.73545e-06	5.3845e-05	3.64262	0.161814	0.419357	9.43065	0.00213388	0.0304315	8.29444	0.00397665	0.0474495	15.5065	8.22205e-05	0.00156844	ubiquitin-associated protein 1 [Source:MGI Symbol;Acc:MGI:2149543]	4	41348996	41390525	1	protein_coding	5	Ubap1	1548	1842	1520	1213	1.27617	1.51855	1.25309	1.52	1.02	1.25	0.84	ubiquitin-associated protein 1	5.4e-05 ( 1.7e-06)	6.2e-01 (6.7e-02)	4.2e-01 (1.6e-01)	6.2e-01 (6.7e-02)
ENSMUSG00000026102	3.05088	0.0806935	0.645556	26.5064	1.75473e-06	5.43229e-05	4.55786	0.102394	0.331054	9.59544	0.00195061	0.0287272	6.78989	0.00916758	0.0825258	12.9834	0.00031426	0.00430972	inositol polyphosphate-1-phosphatase [Source:MGI Symbol;Acc:MGI:104848]	1	52785427	52817688	-1	protein_coding	6	Inpp1	165	143	205	277	0.595668	0.516245	0.740072	0.52	0.8	0.74	1.15	inositol polyphosphate-1-phosphatase	5.4e-05 ( 1.8e-06)	6.5e-01 (8.1e-02)	3.3e-01 (1.0e-01)	6.5e-01 (8.1e-02)
ENSMUSG00000054422	1.69415	0.193055	0.792114	26.4975	1.76253e-06	5.44439e-05	4.20524	0.122136	0.36355	8.83785	0.00295046	0.0371677	8.30018	0.00396413	0.0474495	26.0128	3.39159e-07	1.81096e-05	fatty acid binding protein 1, liver [Source:MGI Symbol;Acc:MGI:95479]	6	71199827	71205023	1	protein_coding	1	Fabp1	81876	50192	102707	134448	0.608979	0.373319	0.763916	0.37	0.8	0.76	1.63	fatty acid binding protein 1, liver	5.4e-05 ( 1.8e-06)	7.9e-01 (1.9e-01)	3.6e-01 (1.2e-01)	7.9e-01 (1.9e-01)
ENSMUSG00000028423	9.57189	0.00197579	0.154392	26.4166	1.83529e-06	5.65666e-05	22.3413	1.40813e-05	0.000891581	37.3398	9.92392e-10	3.41631e-07	38.0484	6.90116e-10	3.23043e-07	16.7537	4.25582e-05	0.000939693	nuclear transcription factor, X-box binding 1 [Source:MGI Symbol;Acc:MGI:1921414]	4	40970906	41025993	1	protein_coding	7	Nfx1	982	1457	995	988	0.993927	1.4747	1.00709	1.47	0.99	1.01	0.67	nuclear transcription factor, X-box binding 1	5.7e-05 ( 1.8e-06)	1.5e-01 (2.0e-03)	8.9e-04 (1.4e-05)	1.5e-01 (2.0e-03)
ENSMUSG00000046179	4.38861e-06	0.998329	0.999474	26.3996	1.85098e-06	5.67998e-05	2.25409	0.323989	0.60327	1.52887	0.216282	0.494636	1.06416	0.302267	0.598038	7.35192	0.00669911	0.043154	E2F transcription factor 8 [Source:MGI Symbol;Acc:MGI:1922038]	7	48866429	48881596	-1	protein_coding	4	E2f8	72	85	110	222	0.324324	0.382883	0.495495	0.38	0.65	0.5	0.85	E2F transcription factor 8	5.7e-05 ( 1.9e-06)	1.0e+00 (1.0e+00)	6.0e-01 (3.2e-01)	1.0e+00 (1.0e+00)
ENSMUSG00000060317	0.00269399	0.958605	0.995504	26.336	1.91082e-06	5.85078e-05	0.0230524	0.98854	0.994668	2.56578	0.109199	0.341331	2.35623	0.124784	0.374618	12.1354	0.000494731	0.00608363	acyl-coenzyme A amino acid N-acyltransferase 2 [Source:MGI Symbol;Acc:MGI:2444345]	4	49379840	49408151	-1	protein_coding	4	Acnat2	1576	1786	736	463	3.40389	3.85745	1.58963	3.86	2.14	1.59	0.88	acyl-coenzyme A amino acid N-acyltransferase 2	5.9e-05 ( 1.9e-06)	1.0e+00 (9.6e-01)	9.9e-01 (9.9e-01)	1.0e+00 (9.6e-01)
ENSMUSG00000018736	13.5226	0.000235709	0.0535331	26.2929	1.9524e-06	5.94624e-05	13.5953	0.00111639	0.0201915	18.457	1.73781e-05	0.00110729	15.0326	0.00010567	0.00439031	10.174	0.00142432	0.0137752	nudE neurodevelopment protein 1 like 1 [Source:MGI Symbol;Acc:MGI:1932915]	11	68821434	68871858	-1	protein_coding	6	Ndel1	1024	1342	1092	809	1.26576	1.65884	1.34981	1.66	0.94	1.35	0.76	nudE neurodevelopment protein 1 like 1	5.9e-05 ( 2.0e-06)	5.4e-02 (2.4e-04)	2.0e-02 (1.1e-03)	5.4e-02 (2.4e-04)
ENSMUSG00000060407	2.46083	0.116717	0.71933	26.2868	1.95838e-06	5.94624e-05	6.43702	0.0400146	0.193879	9.59934	0.00194647	0.0286969	9.46487	0.00209444	0.0316943	16.3029	5.39808e-05	0.00113485	cytochrome P450, family 2, subfamily a, polypeptide 12 [Source:MGI Symbol;Acc:MGI:105055]	7	27029081	27037375	1	protein_coding	2	Cyp2a12	16999	21957	14503	13485	1.26059	1.62825	1.07549	1.63	1.17	1.08	0.77	cytochrome P450, family 2, subfamily a, polypeptide 12	5.9e-05 ( 2.0e-06)	7.2e-01 (1.2e-01)	1.9e-01 (4.0e-02)	7.2e-01 (1.2e-01)
ENSMUSG00000036292	0.00973727	0.921394	0.989908	26.2862	1.95899e-06	5.94624e-05	0.0311202	0.98456	0.992929	5.89388	0.0151936	0.106427	5.61626	0.0177946	0.122344	21.9241	2.8365e-06	0.0001051	GRAM domain containing 1C [Source:MGI Symbol;Acc:MGI:2443024]	16	43980350	44063345	-1	protein_coding	6	Gramd1c	964	958	721	554	1.74007	1.72924	1.30144	1.73	1.34	1.3	1.01	GRAM domain containing 1C	5.9e-05 ( 2.0e-06)	9.9e-01 (9.2e-01)	9.9e-01 (9.8e-01)	9.9e-01 (9.2e-01)
ENSMUSG00000026029	3.40299	0.0650784	0.616946	26.2411	2.00366e-06	6.06867e-05	8.29981	0.0157659	0.112961	18.755	1.48635e-05	0.000972707	16.1902	5.72899e-05	0.00284283	29.282	6.25733e-08	4.26562e-06	caspase 8 [Source:MGI Symbol;Acc:MGI:1261423]	1	58795374	58847503	1	protein_coding	4	Casp8	486	377	563	689	0.70537	0.54717	0.817126	0.55	0.86	0.82	1.29	caspase 8	6.1e-05 ( 2.0e-06)	6.2e-01 (6.5e-02)	1.1e-01 (1.6e-02)	6.2e-01 (6.5e-02)
ENSMUSG00000025981	18.1932	1.99588e-05	0.00995186	26.2199	2.02494e-06	6.11985e-05	18.8309	8.14543e-05	0.00329419	0.000716383	0.978647	0.993489	0.00981827	0.921069	0.969681	1.55441	0.212485	0.437718	coenzyme Q10B [Source:MGI Symbol;Acc:MGI:1915126]	1	55052770	55072702	1	protein_coding	4	Coq10b	885	1286	1288	1222	0.724223	1.05237	1.05401	1.05	0.69	1.05	0.69	coenzyme Q10B	6.1e-05 ( 2.0e-06)	1.0e-02 (2.0e-05)	3.3e-03 (8.1e-05)	1.0e-02 (2.0e-05)
ENSMUSG00000032012	0.578811	0.446779	0.910523	26.1637	2.0827e-06	6.28087e-05	7.05382	0.0293956	0.162992	9.53533	0.00201554	0.0292916	10.1142	0.00147131	0.025197	19.7269	8.93368e-06	0.000270379	nectin cell adhesion molecule 1 [Source:MGI Symbol;Acc:MGI:1926483]	9	43743984	43807461	1	protein_coding	2	Nectin1	1066	1380	774	998	1.06814	1.38277	0.775551	1.38	1.38	0.78	0.77	nectin cell adhesion molecule 1	6.3e-05 ( 2.1e-06)	9.1e-01 (4.5e-01)	1.6e-01 (2.9e-02)	9.1e-01 (4.5e-01)
ENSMUSG00000020592	1.12762	0.288283	0.853437	26.1207	2.12794e-06	6.4035e-05	2.25861	0.323258	0.602608	6.95811	0.00834399	0.0736048	6.34625	0.011763	0.0951336	11.7109	0.000621366	0.0072534	syndecan 1 [Source:MGI Symbol;Acc:MGI:1349162]	12	8771323	8793715	1	protein_coding	5	Sdc1	5740	6440	4452	4418	1.29923	1.45767	1.0077	1.46	1.29	1.01	0.89	syndecan 1	6.4e-05 ( 2.1e-06)	8.5e-01 (2.9e-01)	6.0e-01 (3.2e-01)	8.5e-01 (2.9e-01)
ENSMUSG00000023030	2.64331	0.103987	0.697144	26.0757	2.17642e-06	6.53533e-05	3.10338	0.21189	0.480859	6.47926	0.010914	0.0868706	5.78112	0.0161992	0.115592	12.2328	0.000469565	0.00580978	solute carrier family 11 (proton-coupled divalent metal ion transporters), member 2 [Source:MGI Symbol;Acc:MGI:1345279]	15	100387898	100425072	-1	protein_coding	8	Slc11a2	800	787	656	459	1.74292	1.7146	1.42919	1.71	1.22	1.43	1.02	solute carrier family 11 (proton-coupled divalent metal ion transporters), member 2	6.5e-05 ( 2.2e-06)	7.0e-01 (1.0e-01)	4.8e-01 (2.1e-01)	7.0e-01 (1.0e-01)
ENSMUSG00000021939	3.67057	0.0553812	0.589297	26.0093	2.24988e-06	6.74144e-05	4.52444	0.104119	0.333781	11.9431	0.000548502	0.0122413	10.5988	0.00113162	0.0214514	18.0402	2.16291e-05	0.000545354	cathepsin B [Source:MGI Symbol;Acc:MGI:88561]	14	63122462	63145923	1	protein_coding	3	Ctsb	14742	17351	14065	11742	1.25549	1.47769	1.19784	1.48	1.05	1.2	0.85	cathepsin B	6.7e-05 ( 2.2e-06)	5.9e-01 (5.5e-02)	3.3e-01 (1.0e-01)	5.9e-01 (5.5e-02)
ENSMUSG00000075254	4.92078	0.0265355	0.466457	25.9621	2.3036e-06	6.88766e-05	10.2328	0.00599756	0.0609473	24.6684	6.80917e-07	9.01561e-05	19.934	8.01612e-06	0.000625391	29.7112	5.01439e-08	3.52761e-06	heart development protein with EGF-like domains 1 [Source:MGI Symbol;Acc:MGI:1924696]	16	33684370	33771576	1	protein_coding	8	Heg1	283	487	262	233	1.21459	2.09013	1.12446	2.09	1.08	1.12	0.58	heart development protein with EGF-like domains 1	6.9e-05 ( 2.3e-06)	4.7e-01 (2.7e-02)	6.1e-02 (6.0e-03)	4.7e-01 (2.7e-02)
ENSMUSG00000051495	1.82605	0.176595	0.776795	25.9332	2.33708e-06	6.95802e-05	9.57069	0.00835126	0.075637	18.7995	1.45207e-05	0.000956697	17.4507	2.9485e-05	0.00174836	33.0509	8.97791e-09	8.03036e-07	interferon regulatory factor 2 binding protein 2 [Source:MGI Symbol;Acc:MGI:2443921]	8	126588296	126593986	-1	protein_coding	1	Irf2bp2	2438	3683	1681	1826	1.33516	2.01698	0.920591	2.02	1.45	0.92	0.66	interferon regulatory factor 2 binding protein 2	7.0e-05 ( 2.3e-06)	7.8e-01 (1.8e-01)	7.6e-02 (8.4e-03)	7.8e-01 (1.8e-01)
ENSMUSG00000022790	0.717232	0.397053	0.896796	25.912	2.36197e-06	7.01722e-05	1.06871	0.586047	0.788895	3.25087	0.0713856	0.263749	2.72924	0.0985263	0.330059	8.96324	0.00275466	0.0225429	immunoglobulin superfamily, member 11 [Source:MGI Symbol;Acc:MGI:2388477]	16	38892671	39027159	1	protein_coding	5	Igsf11	597	569	435	380	1.57105	1.49737	1.14474	1.5	1.37	1.14	1.05	immunoglobulin superfamily, member 11	7.0e-05 ( 2.4e-06)	9.0e-01 (4.0e-01)	7.9e-01 (5.9e-01)	9.0e-01 (4.0e-01)
ENSMUSG00000031816	3.0225	0.0821169	0.648773	25.8767	2.40411e-06	7.12728e-05	3.15559	0.206429	0.474469	1.38848	0.238662	0.520907	1.31478	0.251531	0.545624	9.16733	0.00246374	0.0207298	methenyltetrahydrofolate synthetase domain containing [Source:MGI Symbol;Acc:MGI:2679252]	8	121091628	121108392	-1	protein_coding	16	Mthfsd	359	320	227	231	1.55411	1.38528	0.982684	1.39	1.58	0.98	1.12	methenyltetrahydrofolate synthetase domain containing	7.1e-05 ( 2.4e-06)	6.5e-01 (8.2e-02)	4.7e-01 (2.1e-01)	6.5e-01 (8.2e-02)
ENSMUSG00000030244	0.83974	0.359471	0.883905	25.8324	2.45793e-06	7.27142e-05	2.02831	0.362708	0.635136	1.06498	0.302081	0.593135	1.05866	0.30352	0.599485	9.55838	0.00199038	0.0175903	glycogen synthase 2 [Source:MGI Symbol;Acc:MGI:2385254]	6	142422613	142473109	-1	protein_coding	2	Gys2	3313	3552	3691	6482	0.511108	0.547979	0.569423	0.55	0.9	0.57	0.93	glycogen synthase 2	7.3e-05 ( 2.5e-06)	8.8e-01 (3.6e-01)	6.4e-01 (3.6e-01)	8.8e-01 (3.6e-01)
ENSMUSG00000056770	13.9321	0.000189535	0.0472529	25.8053	2.49143e-06	7.33948e-05	13.9321	0.00094337	0.01796	0.00929598	0.92319	0.974125	0.0426691	0.83635	0.938156	2.42047	0.119759	0.30909	SET domain containing 3 [Source:MGI Symbol;Acc:MGI:1289184]	12	108106431	108179314	-1	protein_coding	8	Setd3	1604	1873	2255	1880	0.853191	0.996277	1.19947	1	0.71	1.2	0.86	SET domain containing 3	7.3e-05 ( 2.5e-06)	4.7e-02 (1.9e-04)	1.8e-02 (9.4e-04)	4.7e-02 (1.9e-04)
ENSMUSG00000044361	0.0101471	0.919763	0.989503	25.8056	2.49102e-06	7.33948e-05	0.341256	0.843135	0.929561	10.6759	0.00108541	0.0193825	11.3086	0.000771497	0.0166482	32.7351	1.05614e-08	9.21205e-07	cDNA sequence BC024139 [Source:MGI Symbol;Acc:MGI:2442591]	15	76119517	76126596	-1	protein_coding	5	BC024139	137	99	203	231	0.593074	0.428571	0.878788	0.43	0.67	0.88	1.38	cDNA sequence BC024139	7.3e-05 ( 2.5e-06)	9.9e-01 (9.2e-01)	9.3e-01 (8.4e-01)	9.9e-01 (9.2e-01)
ENSMUSG00000037904	5.67549	0.0172035	0.401077	25.7645	2.54282e-06	7.47515e-05	6.44615	0.0398323	0.193667	1.39071	0.238285	0.520907	1.59348	0.206829	0.489964	5.84103	0.0156567	0.0784399	ankyrin repeat domain 9 [Source:MGI Symbol;Acc:MGI:1921501]	12	110975353	110979040	-1	protein_coding	7	Ankrd9	42	76	76	113	0.371681	0.672566	0.672566	0.67	0.55	0.67	0.55	ankyrin repeat domain 9	7.5e-05 ( 2.5e-06)	4.0e-01 (1.7e-02)	1.9e-01 (4.0e-02)	4.0e-01 (1.7e-02)
ENSMUSG00000060032	3.23887	0.0719102	0.624355	25.7365	2.57864e-06	7.56455e-05	8.41409	0.0148903	0.108706	13.0623	0.000301298	0.00807884	11.4268	0.00072393	0.0160097	10.7552	0.00103986	0.0107531	H2A histone family, member J [Source:MGI Symbol;Acc:MGI:3606192]	6	136808244	136810074	1	protein_coding	2	H2afj	1558	1009	1764	1594	0.977415	0.632999	1.10665	0.63	0.88	1.11	1.54	H2A histone family, member J	7.6e-05 ( 2.6e-06)	6.2e-01 (7.2e-02)	1.1e-01 (1.5e-02)	6.2e-01 (7.2e-02)
ENSMUSG00000027610	5.77771	0.0162307	0.394611	25.7223	2.59706e-06	7.60266e-05	7.7671	0.0205776	0.131062	4.97578	0.0257047	0.146736	4.43359	0.0352382	0.180999	10.0902	0.0014906	0.0142301	glutathione synthetase [Source:MGI Symbol;Acc:MGI:95852]	2	155563181	155592810	-1	protein_coding	9	Gss	2560	2665	2560	1668	1.53477	1.59772	1.53477	1.6	1	1.53	0.96	glutathione synthetase	7.6e-05 ( 2.6e-06)	3.9e-01 (1.6e-02)	1.3e-01 (2.1e-02)	3.9e-01 (1.6e-02)
ENSMUSG00000044749	4.9177	0.026583	0.466457	25.7174	2.60343e-06	7.60539e-05	5.40862	0.0669164	0.260317	11.0528	0.000885552	0.0168794	8.40526	0.00374137	0.045881	10.5529	0.00116007	0.011737	ATP-binding cassette, sub-family A (ABC1), member 6 [Source:MGI Symbol;Acc:MGI:1923434]	11	110176820	110251776	-1	protein_coding	2	Abca6	2011	2395	1876	1478	1.36062	1.62043	1.26928	1.62	1.07	1.27	0.84	ATP-binding cassette, sub-family A (ABC1), member 6	7.6e-05 ( 2.6e-06)	4.7e-01 (2.7e-02)	2.6e-01 (6.7e-02)	4.7e-01 (2.7e-02)
ENSMUSG00000039637	0.568419	0.450888	0.910523	25.6994	2.62695e-06	7.64217e-05	5.67681	0.058519	0.241479	8.01155	0.00464799	0.0507959	7.20179	0.00728308	0.0711734	18.9971	1.30918e-05	0.000366231	coronin 7 [Source:MGI Symbol;Acc:MGI:1926135]	16	4626133	4679777	-1	protein_coding	12	Coro7	298	422	217	238	1.2521	1.77311	0.911765	1.77	1.37	0.91	0.71	coronin 7	7.6e-05 ( 2.6e-06)	9.1e-01 (4.5e-01)	2.4e-01 (5.9e-02)	9.1e-01 (4.5e-01)
ENSMUSG00000090523	0.575929	0.447912	0.910523	25.703	2.62217e-06	7.64217e-05	2.44676	0.294234	0.573029	12.5256	0.000401405	0.00995919	11.2055	0.000815541	0.0171447	15.208	9.6297e-05	0.00177234	glycophorin C [Source:MGI Symbol;Acc:MGI:1098566]	18	32528322	32560034	-1	protein_coding	3	Gypc	223	352	202	134	1.66418	2.62687	1.50746	2.63	1.1	1.51	0.63	glycophorin C	7.6e-05 ( 2.6e-06)	9.1e-01 (4.5e-01)	5.7e-01 (2.9e-01)	9.1e-01 (4.5e-01)
ENSMUSG00000042507	9.0639	0.00260706	0.190899	25.6896	2.63988e-06	7.66387e-05	18.705	8.67481e-05	0.0034357	66.9892	2.72995e-16	5.37021e-13	51.9877	5.58484e-13	7.84279e-10	33.3995	7.50414e-09	6.88763e-07	ELM2 and Myb/SANT-like domain containing 1 [Source:MGI Symbol;Acc:MGI:2685106]	12	84149176	84218881	-1	protein_coding	5	Elmsan1	179	388	179	190	0.942105	2.04211	0.942105	2.04	1	0.94	0.46	ELM2 and Myb/SANT-like domain containing 1	7.7e-05 ( 2.6e-06)	1.9e-01 (2.6e-03)	3.4e-03 (8.7e-05)	1.9e-01 (2.6e-03)
ENSMUSG00000052934	11.3787	0.000742892	0.0975429	25.6661	2.67101e-06	7.73819e-05	36.7753	1.03356e-08	3.24418e-06	0.0406383	0.840238	0.937607	0.0613408	0.804389	0.924113	0.19165	0.661547	0.826595	F-box protein 31 [Source:MGI Symbol;Acc:MGI:1354708]	8	121549440	121578806	-1	protein_coding	5	Fbxo31	1915	4068	3570	4470	0.428412	0.910067	0.798658	0.91	0.54	0.8	0.47	F-box protein 31	7.7e-05 ( 2.7e-06)	9.8e-02 (7.4e-04)	3.2e-06 (1.0e-08)	9.8e-02 (7.4e-04)
ENSMUSG00000004018	0.0769925	0.781415	0.973825	25.6265	2.7245e-06	7.87684e-05	2.75566	0.252124	0.528193	14.4973	0.000140359	0.00480783	15.2409	9.46311e-05	0.00410156	34.8899	3.48879e-09	3.4995e-07	Fanconi anemia, complementation group L [Source:MGI Symbol;Acc:MGI:1914280]	11	26386135	26471876	1	protein_coding	5	Fancl	103	83	181	148	0.695946	0.560811	1.22297	0.56	0.57	1.22	1.24	Fanconi anemia, complementation group L	7.9e-05 ( 2.7e-06)	9.7e-01 (7.8e-01)	5.3e-01 (2.5e-01)	9.7e-01 (7.8e-01)
ENSMUSG00000028024	0.392776	0.530844	0.931746	25.6105	2.74637e-06	7.92371e-05	0.433037	0.805318	0.910523	7.15824	0.00746202	0.0696152	6.26883	0.012288	0.0975541	10.8966	0.000963391	0.0101721	glutamyl aminopeptidase [Source:MGI Symbol;Acc:MGI:106645]	3	129269175	129332720	-1	protein_coding	5	Enpep	1655	1596	1054	1058	1.56427	1.50851	0.996219	1.51	1.57	1	1.04	glutamyl aminopeptidase	7.9e-05 ( 2.7e-06)	9.3e-01 (5.3e-01)	9.1e-01 (8.1e-01)	9.3e-01 (5.3e-01)
ENSMUSG00000015711	2.37538	0.123262	0.731362	25.6016	2.75861e-06	7.94264e-05	4.76186	0.0924646	0.312979	26.0786	3.27792e-07	5.01522e-05	27.1559	1.87694e-07	3.66082e-05	29.7525	4.90865e-08	3.48142e-06	prune exopolyphosphatase [Source:MGI Symbol;Acc:MGI:1925152]	3	95253674	95282076	-1	protein_coding	2	Prune1	382	517	313	311	1.2283	1.66238	1.00643	1.66	1.22	1.01	0.74	prune exopolyphosphatase	7.9e-05 ( 2.8e-06)	7.3e-01 (1.2e-01)	3.1e-01 (9.2e-02)	7.3e-01 (1.2e-01)
ENSMUSG00000000881	1.76312	0.184236	0.784222	25.5973	2.76457e-06	7.94345e-05	3.70103	0.157156	0.413361	6.3906	0.0114726	0.0893542	5.46027	0.0194537	0.128187	11.9633	0.000542596	0.00657888	discs large MAGUK scaffold protein 3 [Source:MGI Symbol;Acc:MGI:1888986]	X	100767722	100818410	1	protein_coding	8	Dlg3	338	354	381	587	0.575809	0.603066	0.649063	0.6	0.89	0.65	0.95	discs large MAGUK scaffold protein 3	7.9e-05 ( 2.8e-06)	7.8e-01 (1.8e-01)	4.1e-01 (1.6e-01)	7.8e-01 (1.8e-01)
ENSMUSG00000022999	2.40612	0.120861	0.728197	25.5502	2.83038e-06	8.11588e-05	2.58322	0.274828	0.551955	2.52177	0.112284	0.346438	2.16765	0.140942	0.400538	7.0172	0.00807305	0.0492057	limb region 1 like [Source:MGI Symbol;Acc:MGI:1289247]	15	98903917	98918231	-1	protein_coding	8	Lmbr1l	283	338	449	472	0.599576	0.716102	0.951271	0.72	0.63	0.95	0.84	limb region 1 like	8.1e-05 ( 2.8e-06)	7.3e-01 (1.2e-01)	5.5e-01 (2.7e-01)	7.3e-01 (1.2e-01)
ENSMUSG00000038459	5.23637	0.0221194	0.434544	25.5375	2.84839e-06	8.13419e-05	13.2635	0.00131789	0.0225718	33.7702	6.20215e-09	1.77e-06	28.3761	9.98901e-08	2.26251e-05	19.5529	9.78508e-06	0.00028868	abhydrolase domain containing 17C [Source:MGI Symbol;Acc:MGI:1917428]	7	84109356	84151893	-1	protein_coding	3	Abhd17c	1237	1765	1171	1074	1.15177	1.64339	1.09032	1.64	1.06	1.09	0.7	abhydrolase domain containing 17C	8.1e-05 ( 2.8e-06)	4.3e-01 (2.2e-02)	2.3e-02 (1.3e-03)	4.3e-01 (2.2e-02)
ENSMUSG00000045316	2.21078	0.137049	0.752119	25.5381	2.84759e-06	8.13419e-05	6.86383	0.032325	0.171076	7.8145	0.00518288	0.0540374	7.6504	0.00567596	0.0603845	18.9709	1.32725e-05	0.000369814	fumarylacetoacetate hydrolase domain containing 1 [Source:MGI Symbol;Acc:MGI:1915886]	17	24848896	24850302	-1	protein_coding	1	Fahd1	827	606	1186	1213	0.681781	0.499588	0.977741	0.5	0.7	0.98	1.36	fumarylacetoacetate hydrolase domain containing 1	8.1e-05 ( 2.8e-06)	7.5e-01 (1.4e-01)	1.7e-01 (3.2e-02)	7.5e-01 (1.4e-01)
ENSMUSG00000003131	0.0229264	0.879649	0.98478	25.4789	2.93315e-06	8.35917e-05	0.599562	0.74098	0.877648	5.76776	0.0163229	0.111436	4.85637	0.0275443	0.157006	16.051	6.16588e-05	0.00125737	platelet-activating factor acetylhydrolase, isoform 1b, subunit 2 [Source:MGI Symbol;Acc:MGI:108415]	9	45962859	46012690	-1	protein_coding	9	Pafah1b2	732	727	555	562	1.30249	1.29359	0.987544	1.29	1.32	0.99	1.01	platelet-activating factor acetylhydrolase, isoform 1b, subunit 2	8.4e-05 ( 2.9e-06)	9.8e-01 (8.8e-01)	8.8e-01 (7.4e-01)	9.8e-01 (8.8e-01)
ENSMUSG00000010453	3.86803	0.0492143	0.571945	25.4056	3.04252e-06	8.65325e-05	9.38008	0.00918633	0.0799405	0.111901	0.73799	0.891962	0.0545496	0.815328	0.928239	4.11381	0.0425344	0.157085	KAT8 regulatory NSL complex subunit 3 [Source:MGI Symbol;Acc:MGI:1918055]	1	36335730	36369181	-1	protein_coding	9	Kansl3	969	1178	1414	1491	0.649899	0.790074	0.948357	0.79	0.69	0.95	0.82	KAT8 regulatory NSL complex subunit 3	8.7e-05 ( 3.0e-06)	5.7e-01 (4.9e-02)	8.0e-02 (9.2e-03)	5.7e-01 (4.9e-02)
ENSMUSG00000022244	0.243087	0.621986	0.946136	25.3697	3.09764e-06	8.75661e-05	8.07913	0.0176051	0.120287	29.2416	6.38924e-08	1.31313e-05	32.821	1.01048e-08	3.3786e-06	46.9152	7.41255e-12	1.79473e-09	alpha-methylacyl-CoA racemase [Source:MGI Symbol;Acc:MGI:1098273]	15	10981756	10996626	1	protein_coding	2	Amacr	3231	2255	3986	3957	0.816528	0.569876	1.00733	0.57	0.81	1.01	1.43	alpha-methylacyl-CoA racemase	8.8e-05 ( 3.1e-06)	9.5e-01 (6.2e-01)	1.2e-01 (1.8e-02)	9.5e-01 (6.2e-01)
ENSMUSG00000036893	0.0338313	0.854066	0.982585	25.3703	3.09671e-06	8.75661e-05	2.6304	0.268421	0.545218	12.7467	0.000356634	0.00916205	13.5861	0.000227865	0.00747641	23.0178	1.60509e-06	6.45972e-05	euchromatic histone methyltransferase 1 [Source:MGI Symbol;Acc:MGI:1924933]	2	24789928	24919614	-1	protein_coding	18	Ehmt1	479	416	615	638	0.750784	0.652038	0.96395	0.65	0.78	0.96	1.15	euchromatic histone methyltransferase 1	8.8e-05 ( 3.1e-06)	9.8e-01 (8.5e-01)	5.5e-01 (2.7e-01)	9.8e-01 (8.5e-01)
ENSMUSG00000000555	0.016546	0.897649	0.988032	25.3011	3.20573e-06	9.00759e-05	15.5272	0.000424919	0.0103407	16.0976	6.01598e-05	0.00266086	17.5836	2.74942e-05	0.00166423	19.9369	8.00401e-06	0.000250335	integrin alpha 5 (fibronectin receptor alpha) [Source:MGI Symbol;Acc:MGI:96604]	15	103344286	103366763	-1	protein_coding	4	Itga5	407	561	311	346	1.1763	1.62139	0.898844	1.62	1.31	0.9	0.73	integrin alpha 5 (fibronectin receptor alpha)	9.0e-05 ( 3.2e-06)	9.9e-01 (9.0e-01)	1.0e-02 (4.2e-04)	9.9e-01 (9.0e-01)
ENSMUSG00000055148	0.618124	0.431745	0.905798	25.2675	3.26008e-06	9.14194e-05	5.30204	0.0705791	0.268657	10.4007	0.0012597	0.0214207	9.20999	0.00240698	0.0350999	19.4423	1.03683e-05	0.000302078	Kruppel-like factor 2 (lung) [Source:MGI Symbol;Acc:MGI:1342772]	8	72319033	72321656	1	protein_coding	1	Klf2	399	566	308	277	1.44043	2.04332	1.11191	2.04	1.3	1.11	0.7	Kruppel-like factor 2 (lung)	9.1e-05 ( 3.3e-06)	9.1e-01 (4.3e-01)	2.7e-01 (7.1e-02)	9.1e-01 (4.3e-01)
ENSMUSG00000111709	3.81535	0.050785	0.57392	25.2517	3.28596e-06	9.1961e-05	4.406	0.110471	0.344531	3.99177	0.0457229	0.20535	3.63001	0.0567466	0.239451	12.688	0.000368004	0.00484337	predicted gene 3776 [Source:MGI Symbol;Acc:MGI:3826440]	9	78257129	78269166	1	protein_coding	1	Gm3776	948	1861	224	21	45.1429	88.619	10.6667	88.62	4.23	10.67	0.51	predicted gene 3776	9.2e-05 ( 3.3e-06)	5.7e-01 (5.1e-02)	3.4e-01 (1.1e-01)	5.7e-01 (5.1e-02)
ENSMUSG00000033147	0.112124	0.737738	0.965341	25.157	3.44531e-06	9.57e-05	0.217834	0.896805	0.953394	4.87648	0.027225	0.151348	3.75294	0.0527148	0.229281	13.7354	0.00021045	0.00317438	solute carrier family 22 (organic anion/cation transporter), member 15 [Source:MGI Symbol;Acc:MGI:3607704]	3	101855776	101924453	-1	protein_coding	7	Slc22a15	547	536	383	329	1.66261	1.62918	1.16413	1.63	1.43	1.16	1.02	solute carrier family 22 (organic anion/cation transporter), member 15	9.6e-05 ( 3.4e-06)	9.7e-01 (7.4e-01)	9.5e-01 (9.0e-01)	9.7e-01 (7.4e-01)
ENSMUSG00000037499	2.28297	0.130801	0.744572	25.105	3.53607e-06	9.76925e-05	2.31024	0.31502	0.594757	1.3208	0.250448	0.534234	0.98401	0.321211	0.61719	8.70306	0.00317677	0.0252899	neuron derived neurotrophic factor [Source:MGI Symbol;Acc:MGI:1913458]	1	191306789	191318194	-1	protein_coding	1	Nenf	435	365	282	307	1.41694	1.18893	0.918567	1.19	1.54	0.92	1.19	neuron derived neurotrophic factor	9.8e-05 ( 3.5e-06)	7.4e-01 (1.3e-01)	5.9e-01 (3.2e-01)	7.4e-01 (1.3e-01)
ENSMUSG00000037710	5.54882	0.0184932	0.408094	25.0813	3.57817e-06	9.85617e-05	6.57432	0.0373598	0.186609	1.23441	0.266551	0.554443	1.204	0.272524	0.567936	7.33066	0.00677882	0.0434879	CDGSH iron sulfur domain 1 [Source:MGI Symbol;Acc:MGI:1261855]	10	71330480	71344954	-1	protein_coding	1	Cisd1	3426	4003	4673	4774	0.717637	0.8385	0.978844	0.84	0.73	0.98	0.86	CDGSH iron sulfur domain 1	9.9e-05 ( 3.6e-06)	4.1e-01 (1.8e-02)	1.9e-01 (3.7e-02)	4.1e-01 (1.8e-02)
ENSMUSG00000041966	0.15721	0.691738	0.957495	25.0768	3.58628e-06	9.85871e-05	1.81765	0.402997	0.666801	6.37313	0.0115861	0.0900849	6.03394	0.0140333	0.106081	20.969	4.66785e-06	0.000161455	DDB1 and CUL4 associated factor 17 [Source:MGI Symbol;Acc:MGI:1923013]	2	71055328	71099142	1	protein_coding	9	Dcaf17	189	188	296	291	0.649485	0.646048	1.01718	0.65	0.64	1.02	1.01	DDB1 and CUL4 associated factor 17	9.9e-05 ( 3.6e-06)	9.6e-01 (6.9e-01)	6.7e-01 (4.0e-01)	9.6e-01 (6.9e-01)
ENSMUSG00000029782	0.027605	0.868041	0.984744	25.0729	3.59318e-06	9.85871e-05	1.22077	0.543142	0.762726	7.96376	0.0047723	0.0514199	8.19738	0.00419509	0.0491415	14.9696	0.000109256	0.00196232	transmembrane protein 209 [Source:MGI Symbol;Acc:MGI:1919899]	6	30479053	30509783	-1	protein_coding	11	Tmem209	243	264	153	157	1.54777	1.68153	0.974522	1.68	1.59	0.97	0.92	transmembrane protein 209	9.9e-05 ( 3.6e-06)	9.8e-01 (8.7e-01)	7.6e-01 (5.4e-01)	9.8e-01 (8.7e-01)
ENSMUSG00000062054	0.0450533	0.831906	0.980326	25.0679	3.60228e-06	9.86434e-05	0.567336	0.753017	0.884196	9.64675	0.00189686	0.0281533	8.94726	0.00277887	0.0382954	22.8736	1.73011e-06	6.92193e-05	isoamyl acetate-hydrolyzing esterase 1 homolog [Source:MGI Symbol;Acc:MGI:1914982]	12	21316389	21323819	1	protein_coding	4	Iah1	3106	2782	3871	4032	0.770337	0.68998	0.960069	0.69	0.8	0.96	1.12	isoamyl acetate-hydrolyzing esterase 1 homolog	9.9e-05 ( 3.6e-06)	9.8e-01 (8.3e-01)	8.8e-01 (7.5e-01)	9.8e-01 (8.3e-01)
ENSMUSG00000052957	0.825103	0.363692	0.886251	25.06	3.6165e-06	9.88393e-05	1.86314	0.393934	0.659132	3.68109	0.055033	0.228338	3.4594	0.0628932	0.253898	16.116	5.95783e-05	0.00121962	growth arrest specific 1 [Source:MGI Symbol;Acc:MGI:95655]	13	60174405	60177365	-1	protein_coding	2	Gas1	230	174	378	503	0.457256	0.345924	0.751491	0.35	0.61	0.75	1.32	growth arrest specific 1	9.9e-05 ( 3.6e-06)	8.9e-01 (3.6e-01)	6.6e-01 (3.9e-01)	8.9e-01 (3.6e-01)
ENSMUSG00000018796	6.59745	0.0102125	0.333938	25.0259	3.67872e-06	0.000100148	8.15846	0.0169205	0.117963	13.0568	0.000302178	0.00807884	10.2719	0.00135072	0.0238894	25.0282	5.64966e-07	2.7644e-05	acyl-CoA synthetase long-chain family member 1 [Source:MGI Symbol;Acc:MGI:102797]	8	46471037	46536051	1	protein_coding	11	Acsl1	18598	11137	20235	28424	0.654306	0.391817	0.711898	0.39	0.92	0.71	1.67	acyl-CoA synthetase long-chain family member 1	1.0e-04 ( 3.7e-06)	3.3e-01 (1.0e-02)	1.2e-01 (1.7e-02)	3.3e-01 (1.0e-02)
ENSMUSG00000020988	0.0358888	0.849745	0.981331	25.0268	3.67702e-06	0.000100148	6.2115	0.044791	0.207344	8.97824	0.00273213	0.0354585	9.06041	0.00261203	0.0368651	27.3391	1.70721e-07	9.78546e-06	L-2-hydroxyglutarate dehydrogenase [Source:MGI Symbol;Acc:MGI:2384968]	12	69690433	69724873	-1	protein_coding	3	L2hgdh	1112	817	1404	1301	0.854727	0.627978	1.07917	0.63	0.79	1.08	1.36	L-2-hydroxyglutarate dehydrogenase	1.0e-04 ( 3.7e-06)	9.8e-01 (8.5e-01)	2.1e-01 (4.5e-02)	9.8e-01 (8.5e-01)
ENSMUSG00000026158	0.207144	0.649015	0.94825	25.0167	3.69574e-06	0.000100416	1.50068	0.472206	0.715881	5.18078	0.0228381	0.135611	4.5529	0.032863	0.174281	11.1863	0.00082403	0.00901235	opioid growth factor receptor-like 1 [Source:MGI Symbol;Acc:MGI:1917405]	1	23366424	23397772	-1	protein_coding	4	Ogfrl1	319	325	357	613	0.520392	0.530179	0.582382	0.53	0.89	0.58	0.98	opioid growth factor receptor-like 1	1.0e-04 ( 3.7e-06)	9.5e-01 (6.5e-01)	7.2e-01 (4.7e-01)	9.5e-01 (6.5e-01)
ENSMUSG00000036473	0.997487	0.317919	0.864895	24.9796	3.76477e-06	0.000102094	8.46589	0.0145096	0.107311	15.1957	9.6926e-05	0.00366668	16.8424	4.06155e-05	0.00218621	25.9261	3.5474e-07	1.87637e-05	TBC1 domain family, member 24 [Source:MGI Symbol;Acc:MGI:2443456]	17	24175431	24209387	-1	protein_coding	16	Tbc1d24	618	808	565	549	1.12568	1.47177	1.02914	1.47	1.09	1.03	0.76	TBC1 domain family, member 24	1.0e-04 ( 3.8e-06)	8.6e-01 (3.2e-01)	1.1e-01 (1.5e-02)	8.6e-01 (3.2e-01)
ENSMUSG00000004207	6.23235	0.0125437	0.360426	24.9583	3.80516e-06	0.00010299	8.13674	0.0171053	0.118786	10.5516	0.00116085	0.0202854	9.26373	0.00233737	0.0342627	15.5248	8.14283e-05	0.00155708	prosaposin [Source:MGI Symbol;Acc:MGI:97783]	10	60277627	60302597	1	protein_coding	5	Psap	10939	13699	10239	9788	1.11759	1.39957	1.04608	1.4	1.07	1.05	0.8	prosaposin	1.0e-04 ( 3.8e-06)	3.6e-01 (1.3e-02)	1.2e-01 (1.7e-02)	3.6e-01 (1.3e-02)
ENSMUSG00000026509	3.26538	0.0707568	0.624355	24.8518	4.01332e-06	0.000107997	3.84187	0.14647	0.39929	1.00589	0.315889	0.604106	0.8992	0.342996	0.638232	7.72843	0.00543581	0.037128	calpain 2 [Source:MGI Symbol;Acc:MGI:88264]	1	182467260	182517608	-1	protein_coding	5	Capn2	1276	1051	961	854	1.49415	1.23068	1.12529	1.23	1.33	1.13	1.21	calpain 2	1.1e-04 ( 4.0e-06)	6.2e-01 (7.1e-02)	4.0e-01 (1.5e-01)	6.2e-01 (7.1e-02)
ENSMUSG00000019975	2.33168	0.126765	0.737393	24.7881	4.14326e-06	0.000111066	2.69518	0.259865	0.535221	2.83479	0.0922428	0.309122	2.53299	0.111488	0.352938	13.516	0.000236534	0.00347817	IKBKB interacting protein [Source:MGI Symbol;Acc:MGI:1914704]	10	91082940	91102607	1	protein_coding	6	Ikbip	144	95	58	69	2.08696	1.37681	0.84058	1.38	2.48	0.84	1.52	IKBKB interacting protein	1.1e-04 ( 4.1e-06)	7.4e-01 (1.3e-01)	5.4e-01 (2.6e-01)	7.4e-01 (1.3e-01)
ENSMUSG00000034957	0.402705	0.525696	0.929824	24.6862	4.35968e-06	0.000116422	0.432356	0.805592	0.910529	6.1323	0.0132734	0.097845	5.05013	0.0246241	0.147273	18.5015	1.69774e-05	0.000450584	CCAAT/enhancer binding protein (C/EBP), alpha [Source:MGI Symbol;Acc:MGI:99480]	7	35119293	35121928	1	protein_coding	2	Cebpa	6524	6284	7286	9751	0.66906	0.644447	0.747205	0.64	0.9	0.75	1.04	CCAAT/enhancer binding protein (C/EBP), alpha	1.2e-04 ( 4.4e-06)	9.3e-01 (5.3e-01)	9.1e-01 (8.1e-01)	9.3e-01 (5.3e-01)
ENSMUSG00000025355	0.430574	0.511708	0.926757	24.6388	4.46425e-06	0.000118987	0.5064	0.776313	0.896046	1.00911	0.315115	0.603748	0.997251	0.317977	0.614377	7.37306	0.00662082	0.0427084	matrix metallopeptidase 19 [Source:MGI Symbol;Acc:MGI:1927899]	10	128790910	128800824	1	protein_coding	3	Mmp19	1628	1714	983	1020	1.59608	1.68039	0.963725	1.68	1.66	0.96	0.95	matrix metallopeptidase 19	1.2e-04 ( 4.5e-06)	9.3e-01 (5.1e-01)	9.0e-01 (7.8e-01)	9.3e-01 (5.1e-01)
ENSMUSG00000068747	0.0243047	0.876112	0.98478	24.6167	4.51394e-06	0.000119888	14.0335	0.000896716	0.0175447	0.298383	0.584898	0.80979	0.153869	0.694865	0.870256	4.71427	0.0299133	0.123261	sortilin 1 [Source:MGI Symbol;Acc:MGI:1338015]	3	108284082	108361511	1	protein_coding	3	Sort1	590	430	430	264	2.23485	1.62879	1.62879	1.63	1.37	1.63	1.37	sortilin 1	1.2e-04 ( 4.5e-06)	9.8e-01 (8.8e-01)	1.8e-02 (9.0e-04)	9.8e-01 (8.8e-01)
ENSMUSG00000037926	3.59593	0.0579211	0.598753	24.6161	4.5152e-06	0.000119888	4.2503	0.119415	0.358886	2.28018	0.131036	0.379834	2.28234	0.130855	0.383471	8.82614	0.00296946	0.0239794	slingshot protein phosphatase 2 [Source:MGI Symbol;Acc:MGI:2679255]	11	77216287	77460220	1	protein_coding	7	Ssh2	317	344	464	459	0.690632	0.749455	1.01089	0.75	0.68	1.01	0.92	slingshot protein phosphatase 2	1.2e-04 ( 4.5e-06)	6.0e-01 (5.8e-02)	3.6e-01 (1.2e-01)	6.0e-01 (5.8e-02)
ENSMUSG00000021690	7.12038	0.00762127	0.298791	24.5778	4.60249e-06	0.000121975	7.34964	0.025354	0.149935	13.8723	0.000195663	0.006041	11.4076	0.000731431	0.0160995	17.1517	3.45097e-05	0.000799703	junction-mediating and regulatory protein [Source:MGI Symbol;Acc:MGI:1913096]	13	93430101	93499808	-1	protein_coding	2	Jmy	595	616	524	355	1.67606	1.73521	1.47606	1.74	1.14	1.48	0.97	junction-mediating and regulatory protein	1.2e-04 ( 4.6e-06)	3.0e-01 (7.6e-03)	1.5e-01 (2.5e-02)	3.0e-01 (7.6e-03)
ENSMUSG00000048481	0.13057	0.717842	0.963336	24.5222	4.73239e-06	0.00012518	0.24843	0.88319	0.94701	6.68175	0.00974049	0.0809943	6.56071	0.0104254	0.0887839	22.8605	1.74193e-06	6.94941e-05	Myb-related transcription factor, partner of profilin [Source:MGI Symbol;Acc:MGI:2446472]	7	18991245	19001766	1	protein_coding	3	Mypop	125	128	92	65	1.92308	1.96923	1.41538	1.97	1.36	1.42	0.98	Myb-related transcription factor, partner of profilin	1.3e-04 ( 4.7e-06)	9.6e-01 (7.2e-01)	9.5e-01 (8.8e-01)	9.6e-01 (7.2e-01)
ENSMUSG00000019866	2.5841	0.107942	0.704245	24.5003	4.78438e-06	0.000126317	9.62909	0.0081109	0.0747175	0.336867	0.561644	0.796113	0.312697	0.57603	0.805869	3.46393	0.0627211	0.202528	crystallin beta-gamma domain containing 1 [Source:MGI Symbol;Acc:MGI:109544]	10	43950636	44148853	-1	protein_coding	2	Crybg1	312	448	491	613	0.508972	0.730832	0.800979	0.73	0.64	0.8	0.7	crystallin beta-gamma domain containing 1	1.3e-04 ( 4.8e-06)	7.0e-01 (1.1e-01)	7.5e-02 (8.1e-03)	7.0e-01 (1.1e-01)
ENSMUSG00000032403	1.43669	0.230676	0.82063	24.4884	4.81299e-06	0.000126833	1.51399	0.469074	0.714149	3.3739	0.0662367	0.253215	3.21735	0.0728615	0.277288	13.9005	0.000192745	0.00298755	RIKEN cDNA 2300009A05 gene [Source:MGI Symbol;Acc:MGI:1916728]	9	63394447	63399246	-1	protein_coding	4	2300009A05Rik	187	256	367	379	0.493404	0.675462	0.968338	0.68	0.51	0.97	0.73	RIKEN cDNA 2300009A05 gene	1.3e-04 ( 4.8e-06)	8.2e-01 (2.3e-01)	7.1e-01 (4.7e-01)	8.2e-01 (2.3e-01)
ENSMUSG00000033216	0.671705	0.412458	0.902469	24.4798	4.83358e-06	0.000126897	4.8789	0.0872087	0.303863	13.0773	0.000298888	0.00807884	11.3079	0.00077177	0.0166482	23.6157	1.17625e-06	5.06563e-05	eukaryotic elongation factor, selenocysteine-tRNA-specific [Source:MGI Symbol;Acc:MGI:2137092]	6	88257334	88446539	-1	protein_coding	6	Eefsec	801	1074	667	735	1.0898	1.46122	0.907483	1.46	1.2	0.91	0.75	eukaryotic elongation factor, selenocysteine-tRNA-specific	1.3e-04 ( 4.8e-06)	9.0e-01 (4.1e-01)	3.0e-01 (8.7e-02)	9.0e-01 (4.1e-01)
ENSMUSG00000020733	0.0642775	0.799859	0.977594	24.4807	4.83154e-06	0.000126897	1.56826	0.456518	0.704867	3.84219	0.0499782	0.215809	3.69293	0.0546434	0.234267	14.5708	0.000134993	0.00227849	solute carrier family 9 (sodium/hydrogen exchanger), member 3 regulator 1 [Source:MGI Symbol;Acc:MGI:1349482]	11	115163341	115181181	1	protein_coding	1	Slc9a3r1	3737	4002	4117	5446	0.686192	0.734851	0.755968	0.73	0.91	0.76	0.93	solute carrier family 9 (sodium/hydrogen exchanger), member 3 regulator 1	1.3e-04 ( 4.8e-06)	9.8e-01 (8.0e-01)	7.0e-01 (4.6e-01)	9.8e-01 (8.0e-01)
ENSMUSG00000027332	0.185875	0.666372	0.951921	24.432	4.95072e-06	0.000129729	0.260404	0.877918	0.945179	9.62892	0.00191538	0.0283599	9.7899	0.00175473	0.0283563	21.2363	4.06e-06	0.000142536	isovaleryl coenzyme A dehydrogenase [Source:MGI Symbol;Acc:MGI:1929242]	2	118861954	118882909	1	protein_coding	8	Ivd	2945	3360	3930	4464	0.659722	0.752688	0.880376	0.75	0.75	0.88	0.88	isovaleryl coenzyme A dehydrogenase	1.3e-04 ( 5.0e-06)	9.5e-01 (6.7e-01)	9.5e-01 (8.8e-01)	9.5e-01 (6.7e-01)
ENSMUSG00000016528	7.51575	0.00611618	0.273967	24.4207	4.97862e-06	0.000130216	13.9156	0.000951196	0.0180353	23.4517	1.28091e-06	0.000146984	21.5196	3.5023e-06	0.000338678	19.6628	9.23833e-06	0.000277209	MAP kinase-activated protein kinase 2 [Source:MGI Symbol;Acc:MGI:109298]	1	131053700	131097826	-1	protein_coding	2	Mapkapk2	1431	2115	1431	1369	1.04529	1.54492	1.04529	1.54	1	1.05	0.68	MAP kinase-activated protein kinase 2	1.3e-04 ( 5.0e-06)	2.7e-01 (6.1e-03)	1.8e-02 (9.5e-04)	2.7e-01 (6.1e-03)
ENSMUSG00000029260	0.99985	0.317347	0.864895	24.4111	5.00256e-06	0.000130599	4.70624	0.095072	0.317277	2.05992	0.151218	0.410842	1.69396	0.19308	0.473115	6.0635	0.0138004	0.0719374	UDP glucuronosyltransferase 2 family, polypeptide B34 [Source:MGI Symbol;Acc:MGI:2140962]	5	86889767	86906937	-1	protein_coding	2	Ugt2b34	16410	15629	12433	10422	1.57455	1.49962	1.19296	1.5	1.32	1.19	1.05	UDP glucuronosyltransferase 2 family, polypeptide B34	1.3e-04 ( 5.0e-06)	8.6e-01 (3.2e-01)	3.2e-01 (9.5e-02)	8.6e-01 (3.2e-01)
ENSMUSG00000001761	3.4733	0.0623669	0.610495	24.4065	5.01425e-06	0.00013066	3.5119	0.172743	0.434357	1.75018	0.185854	0.456288	1.41818	0.233703	0.524285	10.0747	0.00150318	0.0143261	smoothened, frizzled class receptor [Source:MGI Symbol;Acc:MGI:108075]	6	29735503	29761365	1	protein_coding	2	Smo	271	198	159	129	2.10078	1.53488	1.23256	1.53	1.7	1.23	1.37	smoothened, frizzled class receptor	1.3e-04 ( 5.0e-06)	6.1e-01 (6.2e-02)	4.3e-01 (1.7e-01)	6.1e-01 (6.2e-02)
ENSMUSG00000019810	0.183048	0.668767	0.952436	24.3234	5.22698e-06	0.000135698	2.59119	0.273735	0.550815	2.05733	0.151475	0.411111	1.31129	0.252161	0.546496	12.4678	0.000414022	0.00531455	fucosidase, alpha-L- 2, plasma [Source:MGI Symbol;Acc:MGI:1914098]	10	13499540	13519035	1	protein_coding	6	Fuca2	255	190	146	104	2.45192	1.82692	1.40385	1.83	1.75	1.4	1.34	fucosidase, alpha-L- 2, plasma	1.4e-04 ( 5.2e-06)	9.5e-01 (6.7e-01)	5.5e-01 (2.7e-01)	9.5e-01 (6.7e-01)
ENSMUSG00000105096	0.116962	0.732353	0.964595	24.265	5.38185e-06	0.000139202	4.9994	0.0821094	0.292843	8.35672	0.00384263	0.0446901	15.8612	6.81631e-05	0.00325234	33.1037	8.73744e-09	7.86538e-07	guanylate-binding protein 10 [Source:MGI Symbol;Acc:MGI:4359647]	5	105215699	105239533	-1	protein_coding	2	Gbp10	47	22	141	56	0.839286	0.392857	2.51786	0.39	0.33	2.52	2.14	guanylate-binding protein 10	1.4e-04 ( 5.4e-06)	9.6e-01 (7.3e-01)	2.9e-01 (8.2e-02)	9.6e-01 (7.3e-01)
ENSMUSG00000026353	0.623241	0.429846	0.905798	24.239	5.45214e-06	0.00014076	4.6395	0.0982983	0.32326	1.04515	0.306626	0.596393	0.837407	0.360139	0.652689	5.3983	0.0201564	0.0931869	UBX domain protein 4 [Source:MGI Symbol;Acc:MGI:1915062]	1	128243964	128279378	1	protein_coding	4	Ubxn4	3491	3296	2716	2109	1.65529	1.56283	1.28781	1.56	1.29	1.29	1.06	UBX domain protein 4	1.4e-04 ( 5.5e-06)	9.1e-01 (4.3e-01)	3.2e-01 (9.8e-02)	9.1e-01 (4.3e-01)
ENSMUSG00000047394	14.0116	0.00018169	0.0464018	24.2319	5.47144e-06	0.000140998	17.7097	0.000142691	0.00493564	0.0471933	0.828021	0.932174	0.0572449	0.810905	0.926569	1.6484	0.199177	0.420925	outer dense fiber of sperm tails 3B [Source:MGI Symbol;Acc:MGI:1917363]	15	89377449	89379282	-1	protein_coding	7	Odf3b	288	225	168	264	1.09091	0.852273	0.636364	0.85	1.71	0.64	1.28	outer dense fiber of sperm tails 3B	1.4e-04 ( 5.5e-06)	4.6e-02 (1.8e-04)	4.9e-03 (1.4e-04)	4.6e-02 (1.8e-04)
ENSMUSG00000023828	1.82571	0.176635	0.776795	24.1867	5.59672e-06	0.000143662	2.9738	0.226073	0.497336	7.25874	0.00705568	0.0670509	5.83198	0.0157374	0.113508	13.9309	0.000189651	0.00295262	solute carrier family 22 (organic cation transporter), member 3 [Source:MGI Symbol;Acc:MGI:1333817]	17	12419972	12507704	-1	protein_coding	1	Slc22a3	148	212	105	85	1.74118	2.49412	1.23529	2.49	1.41	1.24	0.7	solute carrier family 22 (organic cation transporter), member 3	1.4e-04 ( 5.6e-06)	7.8e-01 (1.8e-01)	5.0e-01 (2.3e-01)	7.8e-01 (1.8e-01)
ENSMUSG00000035765	0.352882	0.552486	0.935424	24.1835	5.60561e-06	0.000143662	1.88981	0.388717	0.655607	3.8219	0.0505868	0.217206	3.25157	0.0713551	0.273333	12.548	0.000396628	0.00513823	dymeclin [Source:MGI Symbol;Acc:MGI:1918480]	18	75018772	75286966	1	protein_coding	1	Dym	631	680	775	932	0.677039	0.729614	0.831545	0.73	0.81	0.83	0.93	dymeclin	1.4e-04 ( 5.6e-06)	9.4e-01 (5.5e-01)	6.6e-01 (3.9e-01)	9.4e-01 (5.5e-01)
ENSMUSG00000027865	2.1815	0.139679	0.756635	24.1347	5.74406e-06	0.000146941	16.2147	0.000301309	0.00811836	27.8604	1.30392e-07	2.42634e-05	24.3687	7.95512e-07	0.000121428	23.3715	1.33545e-06	5.50101e-05	ganglioside-induced differentiation-associated-protein 2 [Source:MGI Symbol;Acc:MGI:1338001]	3	100162381	100206981	1	protein_coding	5	Gdap2	531	859	497	449	1.18263	1.91314	1.1069	1.91	1.07	1.11	0.62	ganglioside-induced differentiation-associated-protein 2	1.5e-04 ( 5.7e-06)	7.6e-01 (1.4e-01)	8.1e-03 (3.0e-04)	7.6e-01 (1.4e-01)
ENSMUSG00000047963	3.98419	0.0459291	0.564825	24.1078	5.82183e-06	0.000148659	5.2677	0.0718015	0.271326	12.1181	0.00049935	0.011537	10.7913	0.00101977	0.0198898	11.6424	0.000644659	0.00745712	starch binding domain 1 [Source:MGI Symbol;Acc:MGI:1261768]	5	92603041	92606579	1	protein_coding	3	Stbd1	4624	4266	3920	2472	1.87055	1.72573	1.58576	1.73	1.18	1.59	1.08	starch binding domain 1	1.5e-04 ( 5.8e-06)	5.6e-01 (4.6e-02)	2.7e-01 (7.2e-02)	5.6e-01 (4.6e-02)
ENSMUSG00000031596	18.8661	1.4022e-05	0.00815692	24.0917	5.86874e-06	0.000149583	42.081	7.28148e-10	3.39633e-07	16.1335	5.90319e-05	0.00262216	14.7968	0.000119736	0.00476332	9.50172	0.00205279	0.0180283	solute carrier family 7 (cationic amino acid transporter, y+ system), member 2 [Source:MGI Symbol;Acc:MGI:99828]	8	40862396	40922308	1	protein_coding	5	Slc7a2	12450	26463	14641	16788	0.741601	1.5763	0.872111	1.58	0.85	0.87	0.47	solute carrier family 7 (cationic amino acid transporter, y+ system), member 2	1.5e-04 ( 5.9e-06)	8.2e-03 (1.4e-05)	3.4e-07 (7.3e-10)	8.2e-03 (1.4e-05)
ENSMUSG00000027761	0.305992	0.58015	0.939129	24.0771	5.91186e-06	0.000150408	7.98304	0.0184716	0.123231	9.42485	0.00214064	0.0304511	9.5676	0.00198042	0.0305615	24.9807	5.79063e-07	2.82354e-05	arylacetamide deacetylase [Source:MGI Symbol;Acc:MGI:1915008]	3	60025717	60040160	1	protein_coding	3	Aadac	11576	7313	14079	12206	0.948386	0.599132	1.15345	0.6	0.82	1.15	1.58	arylacetamide deacetylase	1.5e-04 ( 5.9e-06)	9.4e-01 (5.8e-01)	1.2e-01 (1.8e-02)	9.4e-01 (5.8e-01)
ENSMUSG00000026856	2.58625	0.107795	0.704245	24.0532	5.98296e-06	0.000151666	2.99578	0.223602	0.494342	6.56088	0.0104245	0.0842729	6.29613	0.0121002	0.0967121	18.0727	2.12629e-05	0.000542876	dolichyl pyrophosphate phosphatase 1 [Source:MGI Symbol;Acc:MGI:1914093]	2	30392254	30400529	1	protein_coding	11	Dolpp1	245	232	282	394	0.621827	0.588832	0.715736	0.59	0.87	0.72	1.06	dolichyl pyrophosphate phosphatase 1	1.5e-04 ( 6.0e-06)	7.0e-01 (1.1e-01)	4.9e-01 (2.2e-01)	7.0e-01 (1.1e-01)
ENSMUSG00000053279	0.106149	0.744572	0.965954	24.0534	5.98233e-06	0.000151666	1.13912	0.565775	0.777344	3.78462	0.0517256	0.219698	3.30711	0.0689806	0.268337	8.00338	0.00466902	0.0332759	aldehyde dehydrogenase family 1, subfamily A1 [Source:MGI Symbol;Acc:MGI:1353450]	19	20492715	20643462	1	protein_coding	6	Aldh1a1	45613	45443	36225	25972	1.75624	1.74969	1.39477	1.75	1.26	1.39	1	aldehyde dehydrogenase family 1, subfamily A1	1.5e-04 ( 6.0e-06)	9.7e-01 (7.4e-01)	7.8e-01 (5.7e-01)	9.7e-01 (7.4e-01)
ENSMUSG00000020190	16.5241	4.80348e-05	0.0192804	24.0366	6.03282e-06	0.000152571	37.9465	5.75467e-09	2.01313e-06	22.5425	2.05542e-06	0.000204809	19.3533	1.08632e-05	0.000802904	12.2407	0.00046758	0.00579032	MAP kinase-interacting serine/threonine kinase 2 [Source:MGI Symbol;Acc:MGI:894279]	10	80665327	80678112	-1	protein_coding	5	Mknk2	3302	7177	3548	3649	0.904905	1.96684	0.972321	1.97	0.93	0.97	0.46	MAP kinase-interacting serine/threonine kinase 2	1.5e-04 ( 6.0e-06)	1.9e-02 (4.8e-05)	2.0e-06 (5.8e-09)	1.9e-02 (4.8e-05)
ENSMUSG00000016028	0.0336071	0.854545	0.982585	24.0341	6.04048e-06	0.000152571	1.82829	0.400858	0.664778	3.62838	0.0568021	0.231821	3.43707	0.0637488	0.255413	11.9672	0.000541459	0.00657192	cadherin, EGF LAG seven-pass G-type receptor 1 [Source:MGI Symbol;Acc:MGI:1100883]	15	85898929	86033777	-1	protein_coding	4	Celsr1	294	416	197	188	1.56383	2.21277	1.04787	2.21	1.49	1.05	0.71	cadherin, EGF LAG seven-pass G-type receptor 1	1.5e-04 ( 6.0e-06)	9.8e-01 (8.5e-01)	6.6e-01 (4.0e-01)	9.8e-01 (8.5e-01)
ENSMUSG00000021876	1.70652	0.191438	0.790436	23.9868	6.185e-06	0.00015566	1.87487	0.39163	0.657636	1.74328	0.186724	0.45755	1.93653	0.164046	0.437966	11.6936	0.00062716	0.00729677	ribonuclease, RNase A family 4 [Source:MGI Symbol;Acc:MGI:1926217]	14	51091077	51106151	1	protein_coding	2	Rnase4	19216	27852	35299	37016	0.519127	0.752431	0.953615	0.75	0.54	0.95	0.69	ribonuclease, RNase A family 4	1.6e-04 ( 6.2e-06)	7.9e-01 (1.9e-01)	6.6e-01 (3.9e-01)	7.9e-01 (1.9e-01)
ENSMUSG00000034216	0.65369	0.418796	0.905662	23.9594	6.27009e-06	0.000157518	10.9487	0.00419304	0.0488637	16.8809	3.98e-05	0.00198567	16.2688	5.49612e-05	0.0027565	18.0788	2.11953e-05	0.000542876	VPS18 CORVET/HOPS core subunit [Source:MGI Symbol;Acc:MGI:2443626]	2	119288740	119298453	1	protein_coding	3	Vps18	387	523	315	349	1.10888	1.49857	0.902579	1.5	1.23	0.9	0.74	VPS18 CORVET/HOPS core subunit	1.6e-04 ( 6.3e-06)	9.1e-01 (4.2e-01)	4.9e-02 (4.2e-03)	9.1e-01 (4.2e-01)
ENSMUSG00000025509	6.82009	0.00901378	0.317789	23.928	6.36941e-06	0.000159726	52.8344	3.36634e-12	3.14035e-09	0.104165	0.746888	0.8968	0.178805	0.672402	0.859441	0.083609	0.772465	0.890183	patatin-like phospholipase domain containing 2 [Source:MGI Symbol;Acc:MGI:1914103]	7	141455198	141460743	1	protein_coding	7	Pnpla2	1528	3545	2947	4570	0.334354	0.775711	0.644858	0.78	0.52	0.64	0.43	patatin-like phospholipase domain containing 2	1.6e-04 ( 6.4e-06)	3.2e-01 (9.0e-03)	3.1e-09 (3.4e-12)	3.2e-01 (9.0e-03)
ENSMUSG00000026858	3.12685	0.0770126	0.636423	23.91	6.42707e-06	0.000160884	3.12983	0.209105	0.477872	12.6331	0.000378983	0.009593	10.3379	0.0013033	0.0234643	25.84	3.70913e-07	1.93633e-05	mitoguardin 2 [Source:MGI Symbol;Acc:MGI:1922035]	2	30364233	30385521	1	protein_coding	12	Miga2	793	653	793	1307	0.606733	0.499617	0.606733	0.5	1	0.61	1.21	mitoguardin 2	1.6e-04 ( 6.4e-06)	6.4e-01 (7.7e-02)	4.8e-01 (2.1e-01)	6.4e-01 (7.7e-02)
ENSMUSG00000006732	0.366282	0.545038	0.934401	23.8899	6.49203e-06	0.000162174	0.436847	0.803785	0.910032	2.02028	0.155211	0.415685	2.18442	0.139413	0.397438	9.74559	0.00179753	0.0162856	methyltransferase like 1 [Source:MGI Symbol;Acc:MGI:1339986]	10	127041414	127046365	1	protein_coding	5	Mettl1	290	265	175	174	1.66667	1.52299	1.00575	1.52	1.66	1.01	1.09	methyltransferase like 1	1.6e-04 ( 6.5e-06)	9.3e-01 (5.5e-01)	9.1e-01 (8.0e-01)	9.3e-01 (5.5e-01)
ENSMUSG00000025779	0.330037	0.565637	0.936478	23.8734	6.54576e-06	0.00016298	0.711845	0.700527	0.856811	3.79639	0.0513631	0.218938	3.80195	0.0511928	0.225715	9.86741	0.00168232	0.0155427	lymphocyte antigen 96 [Source:MGI Symbol;Acc:MGI:1341909]	1	16688051	16709611	1	protein_coding	3	Ly96	202	186	118	108	1.87037	1.72222	1.09259	1.72	1.71	1.09	1.09	lymphocyte antigen 96	1.6e-04 ( 6.5e-06)	9.4e-01 (5.7e-01)	8.6e-01 (7.0e-01)	9.4e-01 (5.7e-01)
ENSMUSG00000024164	5.35882	0.0206177	0.418904	23.8148	6.74037e-06	0.000167231	14.4125	0.000741939	0.0152228	14.2092	0.000163573	0.00537565	11.2299	0.000804918	0.0171265	14.6377	0.000130285	0.00222037	complement component 3 [Source:MGI Symbol;Acc:MGI:88227]	17	57203970	57228136	-1	protein_coding	4	C3	109026	167480	102452	102948	1.05904	1.62684	0.995182	1.63	1.06	1	0.65	complement component 3	1.7e-04 ( 6.7e-06)	4.2e-01 (2.1e-02)	1.5e-02 (7.4e-04)	4.2e-01 (2.1e-02)
ENSMUSG00000031422	2.94009	0.086406	0.656747	23.7519	6.95575e-06	0.000172269	16.9725	0.000206281	0.00637065	0.0133321	0.908077	0.966846	0.0320581	0.8579	0.944605	2.5482	0.11042	0.294236	mortality factor 4 like 2 [Source:MGI Symbol;Acc:MGI:1927167]	X	136732942	136743690	-1	protein_coding	15	Morf4l2	2628	1901	1887	1668	1.57554	1.13969	1.13129	1.14	1.39	1.13	1.38	mortality factor 4 like 2	1.7e-04 ( 7.0e-06)	6.6e-01 (8.6e-02)	6.4e-03 (2.1e-04)	6.6e-01 (8.6e-02)
ENSMUSG00000068877	1.9548	0.16207	0.769852	23.7442	6.98238e-06	0.000172623	5.24123	0.072758	0.274052	17.1909	3.38056e-05	0.0017654	16.9909	3.75589e-05	0.00206839	32.6196	1.12079e-08	9.71558e-07	selenium binding protein 2 [Source:MGI Symbol;Acc:MGI:104859]	3	94693556	94704413	1	protein_coding	7	Selenbp2	2695	906	7173	15197	0.177338	0.059617	0.472001	0.06	0.38	0.47	2.97	selenium binding protein 2	1.7e-04 ( 7.0e-06)	7.7e-01 (1.6e-01)	2.7e-01 (7.3e-02)	7.7e-01 (1.6e-01)
ENSMUSG00000019437	0.125181	0.723482	0.963336	23.7297	7.03322e-06	0.000173573	0.517774	0.77191	0.893781	4.12505	0.0422527	0.195071	4.0436	0.0443392	0.20769	17.345	3.11712e-05	0.00072913	TLC domain containing 1 [Source:MGI Symbol;Acc:MGI:1915572]	11	78176711	78181909	1	protein_coding	8	Tlcd1	943	716	1121	1266	0.744866	0.565561	0.885466	0.57	0.84	0.89	1.32	TLC domain containing 1	1.7e-04 ( 7.0e-06)	9.6e-01 (7.2e-01)	8.9e-01 (7.7e-01)	9.6e-01 (7.2e-01)
ENSMUSG00000022149	0.040515	0.840477	0.980687	23.5533	7.68175e-06	0.000189027	5.04792	0.0801416	0.288728	14.2557	0.000159579	0.0052822	17.0701	3.60255e-05	0.00200756	38.7894	4.72079e-10	6.26201e-08	complement component 9 [Source:MGI Symbol;Acc:MGI:1098282]	15	6445327	6498751	1	protein_coding	4	C9	6721	5032	10479	10367	0.648307	0.485386	1.0108	0.49	0.64	1.01	1.34	complement component 9	1.9e-04 ( 7.7e-06)	9.8e-01 (8.4e-01)	2.9e-01 (8.0e-02)	9.8e-01 (8.4e-01)
ENSMUSG00000024150	0.0145311	0.904051	0.988472	23.5521	7.68644e-06	0.000189027	4.58733	0.100896	0.32803	1.57358	0.209688	0.486873	1.35265	0.244815	0.537765	5.73483	0.0166317	0.0818071	multiple coagulation factor deficiency 2 [Source:MGI Symbol;Acc:MGI:2183439]	17	87254658	87265935	-1	protein_coding	7	Mcfd2	7861	6765	5925	5246	1.49848	1.28955	1.12943	1.29	1.33	1.13	1.16	multiple coagulation factor deficiency 2	1.9e-04 ( 7.7e-06)	9.9e-01 (9.0e-01)	3.3e-01 (1.0e-01)	9.9e-01 (9.0e-01)
ENSMUSG00000027435	4.97759	0.0256777	0.462773	23.5067	7.86299e-06	0.000193029	6.29266	0.0430096	0.203254	14.3497	0.000151806	0.00508605	14.1201	0.000171506	0.00613143	27.9476	1.24643e-07	7.61026e-06	CD93 antigen [Source:MGI Symbol;Acc:MGI:106664]	2	148436640	148443563	-1	protein_coding	1	Cd93	192	312	192	116	1.65517	2.68966	1.65517	2.69	1	1.66	0.62	CD93 antigen	1.9e-04 ( 7.9e-06)	4.6e-01 (2.6e-02)	2.0e-01 (4.3e-02)	4.6e-01 (2.6e-02)
ENSMUSG00000011831	1.0388	0.308102	0.861937	23.4175	8.22141e-06	0.000200772	1.09309	0.578945	0.784441	8.00634	0.00466139	0.0508736	7.04935	0.00792941	0.0748841	13.8594	0.000197007	0.00303684	ecotropic viral integration site 5 [Source:MGI Symbol;Acc:MGI:104736]	5	107744795	107875107	-1	protein_coding	13	Evi5	1960	2089	1822	1441	1.36017	1.44969	1.2644	1.45	1.08	1.26	0.94	ecotropic viral integration site 5	2.0e-04 ( 8.2e-06)	8.6e-01 (3.1e-01)	7.8e-01 (5.8e-01)	8.6e-01 (3.1e-01)
ENSMUSG00000028792	0.0845635	0.771206	0.971631	23.4094	8.25509e-06	0.000201243	4.31348	0.115702	0.35288	5.78161	0.0161947	0.111001	5.8305	0.0157506	0.113545	22.027	2.68845e-06	0.000100677	adenylate kinase 2 [Source:MGI Symbol;Acc:MGI:87978]	4	128991958	129011529	1	protein_coding	4	Ak2	5568	4320	6725	6806	0.818102	0.634734	0.988099	0.63	0.83	0.99	1.29	adenylate kinase 2	2.0e-04 ( 8.3e-06)	9.7e-01 (7.7e-01)	3.5e-01 (1.2e-01)	9.7e-01 (7.7e-01)
ENSMUSG00000022236	0.568952	0.450676	0.910523	23.3932	8.32207e-06	0.000202523	1.48737	0.475359	0.718152	9.01821	0.00267303	0.0349882	10.1187	0.00146776	0.0251819	27.2701	1.76928e-07	1.00591e-05	ropporin 1-like [Source:MGI Symbol;Acc:MGI:2182357]	15	31441211	31453737	-1	protein_coding	1	Ropn1l	231	210	307	382	0.604712	0.549738	0.803665	0.55	0.75	0.8	1.1	ropporin 1-like	2.0e-04 ( 8.3e-06)	9.1e-01 (4.5e-01)	7.2e-01 (4.8e-01)	9.1e-01 (4.5e-01)
ENSMUSG00000052712	0.0785243	0.779307	0.973609	23.3586	8.46715e-06	0.000205696	11.846	0.00267715	0.036372	0.476087	0.4902	0.745615	0.342548	0.558362	0.79385	4.97511	0.0257146	0.110847	cDNA sequence BC004004 [Source:MGI Symbol;Acc:MGI:2136782]	17	29268788	29302881	1	protein_coding	5	BC004004	3007	2262	2262	1895	1.58681	1.19367	1.19367	1.19	1.33	1.19	1.33	cDNA sequence BC004004	2.1e-04 ( 8.5e-06)	9.7e-01 (7.8e-01)	3.6e-02 (2.7e-03)	9.7e-01 (7.8e-01)
ENSMUSG00000025702	0.106141	0.744581	0.965954	23.3333	8.57491e-06	0.000207953	12.7592	0.00169583	0.0267538	7.14844	0.00750292	0.0697767	7.2492	0.00709327	0.0697555	18.7889	1.46017e-05	0.000402139	membrane-associated ring finger (C3HC4) 8 [Source:MGI Symbol;Acc:MGI:1919029]	6	116338024	116409540	1	protein_coding	16	2018-03-08	2301	1538	3092	2333	0.986284	0.659237	1.32533	0.66	0.74	1.33	1.5	membrane-associated ring finger (C3HC4) 8	2.1e-04 ( 8.6e-06)	9.7e-01 (7.4e-01)	2.7e-02 (1.7e-03)	9.7e-01 (7.4e-01)
ENSMUSG00000017754	2.3353	0.126471	0.737348	23.2541	8.92153e-06	0.000215239	2.56663	0.277117	0.554525	7.6154	0.00578721	0.0579984	7.34211	0.00673577	0.0677745	18.6071	1.60617e-05	0.000430448	phospholipid transfer protein [Source:MGI Symbol;Acc:MGI:103151]	2	164839518	164857711	-1	protein_coding	7	Pltp	614	432	800	2276	0.269772	0.189807	0.351494	0.19	0.77	0.35	1.42	phospholipid transfer protein	2.2e-04 ( 8.9e-06)	7.4e-01 (1.3e-01)	5.5e-01 (2.8e-01)	7.4e-01 (1.3e-01)
ENSMUSG00000042248	0.956677	0.328025	0.868406	23.2274	9.04137e-06	0.000217755	2.22911	0.328061	0.60617	6.09387	0.0135652	0.0991886	6.04266	0.0139642	0.105771	11.9392	0.000549649	0.0066312	cytochrome P450, family 2. subfamily c, polypeptide 37 [Source:MGI Symbol;Acc:MGI:1306806]	19	39992424	40012243	1	protein_coding	1	Cyp2c37	16250	21877	11706	10355	1.56929	2.1127	1.13047	2.11	1.39	1.13	0.74	cytochrome P450, family 2. subfamily c, polypeptide 37	2.2e-04 ( 9.0e-06)	8.7e-01 (3.3e-01)	6.1e-01 (3.3e-01)	8.7e-01 (3.3e-01)
ENSMUSG00000038894	20.4907	5.99205e-06	0.00392142	23.1302	9.49154e-06	0.000228205	31.1411	1.72902e-07	2.78094e-05	20.0064	7.71847e-06	0.000590463	16.5061	4.84939e-05	0.00251292	5.33221	0.0209348	0.0954815	insulin receptor substrate 2 [Source:MGI Symbol;Acc:MGI:109334]	8	10984681	11008458	-1	protein_coding	1	Irs2	275	793	460	352	0.78125	2.25284	1.30682	2.25	0.6	1.31	0.35	insulin receptor substrate 2	2.3e-04 ( 9.5e-06)	3.9e-03 (6.0e-06)	2.8e-05 (1.7e-07)	3.9e-03 (6.0e-06)
ENSMUSG00000019872	1.07541	0.299728	0.859378	23.1238	9.5221e-06	0.000228547	3.63556	0.162386	0.419934	1.8248	0.176742	0.443819	1.5866	0.207812	0.491546	7.04065	0.007968	0.0489264	sphingomyelin phosphodiesterase, acid-like 3A [Source:MGI Symbol;Acc:MGI:1931437]	10	57794335	57811830	1	protein_coding	3	Smpdl3a	1426	1351	1234	971	1.46859	1.39135	1.27085	1.39	1.16	1.27	1.06	sphingomyelin phosphodiesterase, acid-like 3A	2.3e-04 ( 9.5e-06)	8.6e-01 (3.0e-01)	4.2e-01 (1.6e-01)	8.6e-01 (3.0e-01)
ENSMUSG00000034168	6.66498	0.00983257	0.325813	23.0727	9.76865e-06	0.000234063	6.7663	0.0339403	0.175325	0.96516	0.32589	0.613718	1.10236	0.293748	0.589974	6.07961	0.0136751	0.0715309	interferon regulatory factor 2 binding protein-like [Source:MGI Symbol;Acc:MGI:2442463]	12	86880701	86884798	-1	protein_coding	1	Irf2bpl	508	569	775	674	0.753709	0.844214	1.14985	0.84	0.66	1.15	0.89	interferon regulatory factor 2 binding protein-like	2.3e-04 ( 9.8e-06)	3.3e-01 (9.8e-03)	1.8e-01 (3.4e-02)	3.3e-01 (9.8e-03)
ENSMUSG00000030157	0.610559	0.434577	0.905798	23.0079	1.00902e-05	0.000241353	16.7324	0.000232597	0.00690453	12.5465	0.000396941	0.00990655	11.7787	0.000599135	0.0139705	17.3978	3.0318e-05	0.000717954	C-type lectin domain family 2, member d [Source:MGI Symbol;Acc:MGI:2135589]	6	129180615	129186534	1	protein_coding	1	Clec2d	2998	2205	4289	4214	0.711438	0.523256	1.0178	0.52	0.7	1.02	1.36	C-type lectin domain family 2, member d	2.4e-04 ( 1.0e-05)	9.1e-01 (4.3e-01)	6.9e-03 (2.3e-04)	9.1e-01 (4.3e-01)
ENSMUSG00000042406	0.716191	0.397396	0.896851	22.9531	1.03702e-05	0.000247628	1.63802	0.440868	0.694384	8.18264	0.00422931	0.0475408	8.19441	0.00420197	0.0491735	18.704	1.52663e-05	0.000415474	activating transcription factor 4 [Source:MGI Symbol;Acc:MGI:88096]	15	80255184	80257541	1	protein_coding	3	Atf4	3963	4196	2725	2433	1.62885	1.72462	1.12002	1.72	1.45	1.12	0.94	activating transcription factor 4	2.5e-04 ( 1.0e-05)	9.0e-01 (4.0e-01)	6.9e-01 (4.4e-01)	9.0e-01 (4.0e-01)
ENSMUSG00000027361	1.81865	0.177475	0.778524	22.9346	1.0467e-05	0.000249515	2.47744	0.289754	0.568897	8.10227	0.00442097	0.0489363	7.32421	0.00680319	0.0683384	14.8582	0.000115906	0.00204291	GA repeat binding protein, beta 1 [Source:MGI Symbol;Acc:MGI:95611]	2	126627442	126676337	-1	protein_coding	9	Gabpb1	250	238	206	137	1.82482	1.73723	1.50365	1.74	1.21	1.5	1.05	GA repeat binding protein, beta 1	2.5e-04 ( 1.0e-05)	7.8e-01 (1.8e-01)	5.7e-01 (2.9e-01)	7.8e-01 (1.8e-01)
ENSMUSG00000026227	4.60348	0.0319071	0.496433	22.9188	1.055e-05	0.00024979	25.2409	3.30373e-06	0.000280176	23.1708	1.48235e-06	0.000160984	22.7191	1.87497e-06	0.000218682	20.4769	6.03557e-06	0.000198032	RIKEN cDNA 2810459M11 gene [Source:MGI Symbol;Acc:MGI:1920042]	1	86045863	86055456	1	protein_coding	2	2810459M11Rik	1293	744	1411	1299	0.995381	0.572748	1.08622	0.57	0.92	1.09	1.74	RIKEN cDNA 2810459M11 gene	2.5e-04 ( 1.1e-05)	5.0e-01 (3.2e-02)	2.8e-04 (3.3e-06)	5.0e-01 (3.2e-02)
ENSMUSG00000017929	2.41695	0.120029	0.726906	22.9189	1.05491e-05	0.00024979	19.9511	4.65234e-05	0.00223098	6.0949	0.0135573	0.0991886	7.61783	0.00577941	0.0609312	10.8908	0.000966441	0.010189	UDP-Gal:betaGlcNAc beta 1,4-galactosyltransferase, polypeptide 5 [Source:MGI Symbol;Acc:MGI:1927169]	2	167298444	167349183	-1	protein_coding	4	B4galt5	647	482	966	634	1.0205	0.760252	1.52366	0.76	0.67	1.52	1.34	UDP-Gal:betaGlcNAc beta 1,4-galactosyltransferase, polypeptide 5	2.5e-04 ( 1.1e-05)	7.3e-01 (1.2e-01)	2.2e-03 (4.7e-05)	7.3e-01 (1.2e-01)
ENSMUSG00000030717	0.28537	0.593203	0.943647	22.9235	1.05253e-05	0.00024979	4.66397	0.0971026	0.320907	27.3218	1.72262e-07	2.85789e-05	26.7472	2.31889e-07	4.34189e-05	118.102	1.64696e-27	5.78207e-24	nuclear protein transcription regulator 1 [Source:MGI Symbol;Acc:MGI:1891834]	7	126623249	126630861	-1	protein_coding	6	Nupr1	104	238	40	51	2.03922	4.66667	0.784314	4.67	2.6	0.78	0.44	nuclear protein transcription regulator 1	2.5e-04 ( 1.1e-05)	9.4e-01 (5.9e-01)	3.2e-01 (9.7e-02)	9.4e-01 (5.9e-01)
ENSMUSG00000040139	0.263604	0.607655	0.944873	22.928	1.05013e-05	0.00024979	0.390245	0.822734	0.918891	10.2477	0.00136855	0.0224758	8.07553	0.00448669	0.0511564	20.7745	5.16655e-06	0.000173779	RIKEN cDNA 9430038I01 gene [Source:MGI Symbol;Acc:MGI:1924502]	7	137375574	137410762	-1	protein_coding	5	9430038I01Rik	166	142	224	262	0.633588	0.541985	0.854962	0.54	0.74	0.85	1.17	RIKEN cDNA 9430038I01 gene	2.5e-04 ( 1.1e-05)	9.4e-01 (6.1e-01)	9.2e-01 (8.2e-01)	9.4e-01 (6.1e-01)
ENSMUSG00000022129	0.365475	0.545481	0.934401	22.8235	1.10645e-05	0.000261529	1.33951	0.511833	0.743018	5.26425	0.0217678	0.131581	4.77626	0.0288547	0.160988	17.267	3.24771e-05	0.000756346	dopachrome tautomerase [Source:MGI Symbol;Acc:MGI:102563]	14	118012790	118052244	-1	protein_coding	4	Dct	16	11	153	95	0.168421	0.115789	1.61053	0.12	0.1	1.61	1.45	dopachrome tautomerase	2.6e-04 ( 1.1e-05)	9.3e-01 (5.5e-01)	7.4e-01 (5.1e-01)	9.3e-01 (5.5e-01)
ENSMUSG00000051346	1.20778	0.271772	0.846381	22.7292	1.1599e-05	0.00027324	1.559	0.458636	0.70656	8.06197	0.00452041	0.0496776	6.42453	0.0112555	0.0929224	19.8309	8.46037e-06	0.000259408	SPRY domain containing 4 [Source:MGI Symbol;Acc:MGI:1913951]	10	128209908	128211807	-1	protein_coding	1	Spryd4	693	610	797	988	0.701417	0.617409	0.80668	0.62	0.87	0.81	1.14	SPRY domain containing 4	2.7e-04 ( 1.2e-05)	8.5e-01 (2.7e-01)	7.1e-01 (4.6e-01)	8.5e-01 (2.7e-01)
ENSMUSG00000004561	0.609424	0.435005	0.905798	22.7091	1.17163e-05	0.00027554	0.704439	0.703126	0.858762	6.72321	0.0095166	0.0799046	6.09841	0.0135304	0.104342	10.5131	0.00118529	0.0119234	methyltransferase like 17 [Source:MGI Symbol;Acc:MGI:1098577]	14	51884842	51893039	1	protein_coding	16	Mettl17	286	236	326	400	0.715	0.59	0.815	0.59	0.88	0.82	1.21	methyltransferase like 17	2.8e-04 ( 1.2e-05)	9.1e-01 (4.4e-01)	8.6e-01 (7.0e-01)	9.1e-01 (4.4e-01)
ENSMUSG00000024539	12.1841	0.000481977	0.0801076	22.6935	1.18078e-05	0.000277225	26.056	2.19794e-06	0.000209223	15.858	6.8279e-05	0.00292119	12.7081	0.000364067	0.00999704	9.75766	0.00178577	0.0162105	protein tyrosine phosphatase, non-receptor type 2 [Source:MGI Symbol;Acc:MGI:97806]	18	67665511	67724595	-1	protein_coding	4	Ptpn2	295	486	295	302	0.976821	1.60927	0.976821	1.61	1	0.98	0.61	protein tyrosine phosphatase, non-receptor type 2	2.8e-04 ( 1.2e-05)	8.0e-02 (4.8e-04)	2.1e-04 (2.2e-06)	8.0e-02 (4.8e-04)
ENSMUSG00000034108	3.36755	0.0664927	0.618258	22.6703	1.19455e-05	0.000279988	7.24198	0.0267562	0.154519	17.0322	3.6751e-05	0.00187289	14.82	0.000118277	0.00471863	20.0389	7.58814e-06	0.000240001	copper chaperone for superoxide dismutase [Source:MGI Symbol;Acc:MGI:1333783]	19	4825366	4839322	-1	protein_coding	1	Ccs	4239	3218	4727	4945	0.85723	0.650758	0.955915	0.65	0.9	0.96	1.32	copper chaperone for superoxide dismutase	2.8e-04 ( 1.2e-05)	6.2e-01 (6.6e-02)	1.5e-01 (2.7e-02)	6.2e-01 (6.6e-02)
ENSMUSG00000022858	0.83429	0.361035	0.885296	22.6662	1.19702e-05	0.000280098	2.55297	0.279017	0.556714	1.09603	0.29514	0.585771	0.622751	0.430027	0.709453	7.1287	0.00758595	0.0470953	transformer 2 beta [Source:MGI Symbol;Acc:MGI:106016]	16	22244549	22266005	-1	protein_coding	9	Tra2b	1045	810	695	565	1.84956	1.43363	1.23009	1.43	1.5	1.23	1.29	transformer 2 beta	2.8e-04 ( 1.2e-05)	8.9e-01 (3.6e-01)	5.6e-01 (2.8e-01)	8.9e-01 (3.6e-01)
ENSMUSG00000044252	5.43889	0.0196932	0.412089	22.6447	1.20995e-05	0.000282651	5.62005	0.0602034	0.245301	1.08371	0.29787	0.588728	1.07323	0.300217	0.596119	5.27345	0.0216531	0.0978454	oxysterol binding protein-like 1A [Source:MGI Symbol;Acc:MGI:1927551]	18	12755314	12941841	-1	protein_coding	18	Osbpl1a	2623	3021	3583	3504	0.748573	0.862158	1.02255	0.86	0.73	1.02	0.87	oxysterol binding protein-like 1A	2.8e-04 ( 1.2e-05)	4.1e-01 (2.0e-02)	2.5e-01 (6.0e-02)	4.1e-01 (2.0e-02)
ENSMUSG00000030800	3.95012	0.0468682	0.567372	22.6197	1.22515e-05	0.00028525	4.26304	0.118657	0.357375	7.17275	0.00740191	0.0691951	6.90083	0.00861557	0.0794409	22.1933	2.46537e-06	9.30676e-05	protease, serine 8 (prostasin) [Source:MGI Symbol;Acc:MGI:1923810]	7	127925716	127930104	-1	protein_coding	3	Prss8	252	303	239	126	2	2.40476	1.89683	2.4	1.05	1.9	0.83	protease, serine 8 (prostasin)	2.9e-04 ( 1.2e-05)	5.7e-01 (4.7e-02)	3.6e-01 (1.2e-01)	5.7e-01 (4.7e-02)
ENSMUSG00000022241	1.75371	0.185411	0.784736	22.6017	1.23623e-05	0.000287351	1.75376	0.416079	0.676448	1.38291	0.239606	0.521201	1.29487	0.255153	0.549472	8.7603	0.00307859	0.0246902	threonyl-tRNA synthetase [Source:MGI Symbol;Acc:MGI:106314]	15	11382301	11399665	-1	protein_coding	7	Tars	2703	2241	1850	1655	1.63323	1.35408	1.11782	1.35	1.46	1.12	1.21	threonyl-tRNA synthetase	2.9e-04 ( 1.2e-05)	7.8e-01 (1.9e-01)	6.8e-01 (4.2e-01)	7.8e-01 (1.9e-01)
ENSMUSG00000027253	1.34943	0.245377	0.830381	22.5061	1.29677e-05	0.000299433	1.43425	0.488153	0.726484	2.1877	0.139117	0.393517	1.88698	0.169543	0.445188	9.211	0.00240565	0.0203264	low density lipoprotein receptor-related protein 4 [Source:MGI Symbol;Acc:MGI:2442252]	2	91457511	91513779	1	protein_coding	4	Lrp4	397	471	530	625	0.6352	0.7536	0.848	0.75	0.75	0.85	0.84	low density lipoprotein receptor-related protein 4	3.0e-04 ( 1.3e-05)	8.3e-01 (2.5e-01)	7.3e-01 (4.9e-01)	8.3e-01 (2.5e-01)
ENSMUSG00000006641	4.90449	0.026787	0.468258	22.405	1.36402e-05	0.000313412	5.40256	0.0671197	0.260818	0.862465	0.35305	0.640744	0.848511	0.356974	0.650774	6.28559	0.0121724	0.0663573	solute carrier family 5 (sodium-dependent vitamin transporter), member 6 [Source:MGI Symbol;Acc:MGI:2660847]	5	31036036	31048924	-1	protein_coding	7	Slc5a6	212	304	355	371	0.571429	0.819407	0.956873	0.82	0.6	0.96	0.7	solute carrier family 5 (sodium-dependent vitamin transporter), member 6	3.1e-04 ( 1.4e-05)	4.7e-01 (2.7e-02)	2.6e-01 (6.7e-02)	4.7e-01 (2.7e-02)
ENSMUSG00000030137	4.24312	0.0394097	0.535226	22.3283	1.41734e-05	0.000325128	6.41003	0.0405583	0.195364	13.6021	0.000225932	0.00657733	12.9141	0.00032612	0.0093273	25.4364	4.57217e-07	2.29311e-05	tubulin, alpha 8 [Source:MGI Symbol;Acc:MGI:1858225]	6	121210696	121226854	1	protein_coding	1	Tuba8	206	423	132	76	2.71053	5.56579	1.73684	5.57	1.56	1.74	0.49	tubulin, alpha 8	3.3e-04 ( 1.4e-05)	5.4e-01 (3.9e-02)	2.0e-01 (4.1e-02)	5.4e-01 (3.9e-02)
ENSMUSG00000031157	6.44111	0.0111509	0.345446	22.2505	1.47353e-05	0.000336914	6.53454	0.0381103	0.188513	8.23289	0.00411379	0.0467384	6.86991	0.00876592	0.0803523	6.33529	0.0118359	0.0649518	polyglutamine binding protein 1 [Source:MGI Symbol;Acc:MGI:1859638]	X	7894519	7899269	-1	protein_coding	5	Pqbp1	593	542	680	971	0.610711	0.558187	0.700309	0.56	0.87	0.7	1.09	polyglutamine binding protein 1	3.4e-04 ( 1.5e-05)	3.5e-01 (1.1e-02)	1.9e-01 (3.8e-02)	3.5e-01 (1.1e-02)
ENSMUSG00000026142	0.0482798	0.826084	0.979456	22.2108	1.50313e-05	0.00034312	2.0676	0.355653	0.629302	3.70553	0.0542324	0.22664	3.34696	0.0673293	0.264699	9.16406	0.00246815	0.0207298	rhomboid domain containing 1 [Source:MGI Symbol;Acc:MGI:1924117]	1	82316452	82445366	1	protein_coding	3	Rhbdd1	519	444	393	330	1.57273	1.34545	1.19091	1.35	1.32	1.19	1.17	rhomboid domain containing 1	3.4e-04 ( 1.5e-05)	9.8e-01 (8.3e-01)	6.3e-01 (3.6e-01)	9.8e-01 (8.3e-01)
ENSMUSG00000035105	3.88939	0.0485921	0.5685	22.1974	1.51321e-05	0.000344299	9.31711	0.00948013	0.0814337	82.4943	1.05973e-19	4.86416e-16	86.1713	1.65001e-20	1.15856e-16	31.6386	1.85697e-08	1.525e-06	egl-9 family hypoxia-inducible factor 3 [Source:MGI Symbol;Acc:MGI:1932288]	12	54178981	54203860	-1	protein_coding	1	Egln3	484	617	424	409	1.18337	1.50856	1.03667	1.51	1.14	1.04	0.78	egl-9 family hypoxia-inducible factor 3	3.4e-04 ( 1.5e-05)	5.7e-01 (4.9e-02)	8.1e-02 (9.5e-03)	5.7e-01 (4.9e-02)
ENSMUSG00000022462	7.97533	0.0047419	0.244282	22.1802	1.5263e-05	0.000346151	11.623	0.00299301	0.0392146	14.7989	0.000119606	0.00425577	12.4199	0.000424778	0.0110466	16.2073	5.67739e-05	0.0011794	solute carrier family 38, member 2 [Source:MGI Symbol;Acc:MGI:1915010]	15	96687392	96699730	-1	protein_coding	2	Slc38a2	3971	6465	3971	3834	1.03573	1.68623	1.03573	1.69	1	1.04	0.61	solute carrier family 38, member 2	3.5e-04 ( 1.5e-05)	2.4e-01 (4.7e-03)	3.9e-02 (3.0e-03)	2.4e-01 (4.7e-03)
ENSMUSG00000001313	0.289272	0.590688	0.943212	22.1832	1.52399e-05	0.000346151	0.322904	0.850907	0.932604	2.38506	0.1225	0.364324	2.51644	0.112665	0.354424	11.5779	0.00066741	0.00764733	Rho family GTPase 2 [Source:MGI Symbol;Acc:MGI:1338755]	11	101464999	101471853	1	protein_coding	3	Rnd2	397	369	276	271	1.46494	1.36162	1.01845	1.36	1.44	1.02	1.08	Rho family GTPase 2	3.5e-04 ( 1.5e-05)	9.4e-01 (5.9e-01)	9.3e-01 (8.5e-01)	9.4e-01 (5.9e-01)
ENSMUSG00000023027	5.00226	0.0253142	0.461724	22.1635	1.53903e-05	0.000348474	6.95811	0.0308365	0.166987	6.49664	0.0108079	0.0862749	4.83312	0.0279181	0.15815	6.55294	0.0104711	0.0596292	activating transcription factor 1 [Source:MGI Symbol;Acc:MGI:1298366]	15	100227819	100261244	1	protein_coding	9	Atf1	628	697	575	376	1.67021	1.85372	1.52926	1.85	1.09	1.53	0.9	activating transcription factor 1	3.5e-04 ( 1.5e-05)	4.6e-01 (2.5e-02)	1.7e-01 (3.1e-02)	4.6e-01 (2.5e-02)
ENSMUSG00000040331	0.647259	0.421094	0.905798	22.1324	1.56318e-05	0.000352799	2.16215	0.339231	0.616439	6.82048	0.00901181	0.0773245	6.63434	0.0100031	0.0869866	20.7723	5.17266e-06	0.000173779	NSE4 homolog A, SMC5-SMC6 complex component [Source:MGI Symbol;Acc:MGI:1915122]	7	130532526	130573118	-1	protein_coding	7	Nsmce4a	828	731	1022	999	0.828829	0.731732	1.02302	0.73	0.81	1.02	1.13	NSE4 homolog A, SMC5-SMC6 complex component	3.5e-04 ( 1.6e-05)	9.1e-01 (4.2e-01)	6.2e-01 (3.4e-01)	9.1e-01 (4.2e-01)
ENSMUSG00000001249	2.51858	0.112512	0.71228	22.1024	1.58684e-05	0.000357563	2.78577	0.248358	0.523151	4.53999	0.0331118	0.170727	5.04089	0.0247558	0.147469	11.4668	0.000708513	0.00800454	hepsin [Source:MGI Symbol;Acc:MGI:1196620]	7	31098725	31115290	-1	protein_coding	11	Hpn	10296	10984	13462	12671	0.812564	0.866861	1.06243	0.87	0.76	1.06	0.94	hepsin	3.6e-04 ( 1.6e-05)	7.1e-01 (1.1e-01)	5.2e-01 (2.5e-01)	7.1e-01 (1.1e-01)
ENSMUSG00000044066	0.0397998	0.841873	0.980687	22.0964	1.5916e-05	0.000358058	0.292408	0.863981	0.938899	6.06931	0.013755	0.100056	5.46959	0.0193502	0.127815	15.2815	9.26203e-05	0.00171366	centrosomal protein 68 [Source:MGI Symbol;Acc:MGI:2667663]	11	20227037	20249429	-1	protein_coding	4	Cep68	214	206	288	307	0.697068	0.67101	0.938111	0.67	0.74	0.94	1.04	centrosomal protein 68	3.6e-04 ( 1.6e-05)	9.8e-01 (8.4e-01)	9.4e-01 (8.6e-01)	9.8e-01 (8.4e-01)
ENSMUSG00000046070	3.14533	0.0761446	0.63497	22.0547	1.6251e-05	0.000364424	5.39608	0.0673375	0.261248	25.1515	5.29974e-07	7.44667e-05	23.0386	1.58784e-06	0.000200884	43.2198	4.89232e-11	9.16038e-09	insulin-like growth factor binding protein, acid labile subunit [Source:MGI Symbol;Acc:MGI:107973]	17	24878770	24882008	1	protein_coding	1	Igfals	2067	1581	2186	2632	0.785334	0.600684	0.830547	0.6	0.95	0.83	1.31	insulin-like growth factor binding protein, acid labile subunit	3.6e-04 ( 1.6e-05)	6.3e-01 (7.6e-02)	2.6e-01 (6.7e-02)	6.3e-01 (7.6e-02)
ENSMUSG00000071281	10.0022	0.00156357	0.137581	22.0505	1.62852e-05	0.000364606	10.6281	0.00492196	0.0545253	16.3235	5.33986e-05	0.00245099	13.4278	0.000247924	0.00784144	10.4917	0.00119909	0.012002	zinc finger protein 65 [Source:MGI Symbol;Acc:MGI:107769]	13	67705309	67729173	-1	protein_coding	4	Zfp65	153	205	145	119	1.28571	1.72269	1.21849	1.72	1.06	1.22	0.75	zinc finger protein 65	3.6e-04 ( 1.6e-05)	1.4e-01 (1.6e-03)	5.5e-02 (4.9e-03)	1.4e-01 (1.6e-03)
ENSMUSG00000010663	0.0283213	0.866356	0.984744	22.0271	1.64765e-05	0.0003683	1.75657	0.415495	0.676128	5.81817	0.0158614	0.109261	6.52431	0.010641	0.0896407	15.9938	6.35506e-05	0.00128409	fatty acid desaturase 1 [Source:MGI Symbol;Acc:MGI:1923517]	19	10182888	10196870	1	protein_coding	1	Fads1	11324	10914	20480	17726	0.638836	0.615706	1.15537	0.62	0.55	1.16	1.04	fatty acid desaturase 1	3.7e-04 ( 1.6e-05)	9.8e-01 (8.7e-01)	6.8e-01 (4.2e-01)	9.8e-01 (8.7e-01)
ENSMUSG00000030946	5.03807	0.0247961	0.460011	22.0183	1.65499e-05	0.000369351	17.887	0.000130585	0.00464955	17.4461	2.95577e-05	0.00164117	17.3993	3.02933e-05	0.00176518	13.2449	0.000273315	0.00389267	phospholysine phosphohistidine inorganic pyrophosphate phosphatase [Source:MGI Symbol;Acc:MGI:1923679]	7	132610638	132706420	1	protein_coding	7	Lhpp	2435	3938	2435	2367	1.02873	1.66371	1.02873	1.66	1	1.03	0.62	phospholysine phosphohistidine inorganic pyrophosphate phosphatase	3.7e-04 ( 1.7e-05)	4.6e-01 (2.5e-02)	4.6e-03 (1.3e-04)	4.6e-01 (2.5e-02)
ENSMUSG00000055817	0.220884	0.638368	0.948095	22.0074	1.66398e-05	0.000370766	0.225372	0.893431	0.95223	2.14386	0.143141	0.399045	1.90054	0.168018	0.442672	10.8419	0.000992266	0.010391	metastasis associated 3 [Source:MGI Symbol;Acc:MGI:2151172]	17	83706163	83821516	1	protein_coding	9	Mta3	328	313	222	201	1.63184	1.55721	1.10448	1.56	1.48	1.1	1.05	metastasis associated 3	3.7e-04 ( 1.7e-05)	9.5e-01 (6.4e-01)	9.5e-01 (8.9e-01)	9.5e-01 (6.4e-01)
ENSMUSG00000074183	1.90975	0.166991	0.77436	21.9744	1.69167e-05	0.000376335	2.09462	0.35088	0.626098	3.68047	0.0550534	0.228338	3.48269	0.062014	0.2522	12.8504	0.000337405	0.00452981	glutathione S-transferase, alpha 1 (Ya) [Source:MGI Symbol;Acc:MGI:1095417]	9	78230656	78242684	1	protein_coding	2	Gsta1	1241	1785	168	32	38.7812	55.7812	5.25	55.78	7.39	5.25	0.7	glutathione S-transferase, alpha 1 (Ya)	3.8e-04 ( 1.7e-05)	7.7e-01 (1.7e-01)	6.3e-01 (3.5e-01)	7.7e-01 (1.7e-01)
ENSMUSG00000021947	0.0619411	0.803454	0.979163	21.913	1.74444e-05	0.000386847	0.0773046	0.962085	0.983227	3.48355	0.0619817	0.243575	3.17404	0.0748172	0.280774	7.81032	0.00519486	0.0359543	crystallin, lambda 1 [Source:MGI Symbol;Acc:MGI:1915881]	14	57274993	57398529	-1	protein_coding	4	Cryl1	473	440	341	291	1.62543	1.51203	1.17182	1.51	1.39	1.17	1.08	crystallin, lambda 1	3.9e-04 ( 1.7e-05)	9.8e-01 (8.0e-01)	9.8e-01 (9.6e-01)	9.8e-01 (8.0e-01)
ENSMUSG00000024924	0.920136	0.337439	0.871986	21.8989	1.7568e-05	0.000388969	2.27635	0.320403	0.600429	13.8214	0.000201033	0.00612401	12.9814	0.000314599	0.00914681	47.3428	5.95967e-12	1.52167e-09	very low density lipoprotein receptor [Source:MGI Symbol;Acc:MGI:98935]	19	27216484	27254231	1	protein_coding	8	Vldlr	205	338	117	73	2.80822	4.63014	1.60274	4.63	1.75	1.6	0.61	very low density lipoprotein receptor	3.9e-04 ( 1.8e-05)	8.7e-01 (3.4e-01)	6.0e-01 (3.2e-01)	8.7e-01 (3.4e-01)
ENSMUSG00000004032	1.49577	0.221323	0.815116	21.8853	1.76871e-05	0.000390989	1.52735	0.46595	0.711562	2.00825	0.156445	0.417412	1.70942	0.191061	0.470548	9.56588	0.00198227	0.0175406	glutathione S-transferase, mu 5 [Source:MGI Symbol;Acc:MGI:1309466]	3	107895821	107898686	1	protein_coding	6	Gstm5	395	367	299	266	1.48496	1.3797	1.12406	1.38	1.32	1.12	1.08	glutathione S-transferase, mu 5	3.9e-04 ( 1.8e-05)	8.2e-01 (2.2e-01)	7.1e-01 (4.7e-01)	8.2e-01 (2.2e-01)
ENSMUSG00000027765	2.20718	0.137369	0.752299	21.8564	1.79448e-05	0.000395545	3.59471	0.165737	0.425215	12.0238	0.000525258	0.0118765	12.7255	0.000360701	0.00996768	27.779	1.35995e-07	8.09227e-06	purinergic receptor P2Y, G-protein coupled 1 [Source:MGI Symbol;Acc:MGI:105049]	3	61002795	61008982	1	protein_coding	3	P2ry1	141	74	141	287	0.491289	0.25784	0.491289	0.26	1	0.49	1.91	purinergic receptor P2Y, G-protein coupled 1	4.0e-04 ( 1.8e-05)	7.5e-01 (1.4e-01)	4.3e-01 (1.7e-01)	7.5e-01 (1.4e-01)
ENSMUSG00000053436	0.0486196	0.825483	0.979456	21.8559	1.79498e-05	0.000395545	0.219855	0.895899	0.95297	8.48234	0.0035861	0.0427792	8.01485	0.00463953	0.0523703	25.9224	3.55418e-07	1.87637e-05	mitogen-activated protein kinase 14 [Source:MGI Symbol;Acc:MGI:1346865]	17	28691342	28748404	1	protein_coding	7	Mapk14	1600	1613	1726	2257	0.708906	0.714665	0.764732	0.71	0.93	0.76	0.99	mitogen-activated protein kinase 14	4.0e-04 ( 1.8e-05)	9.8e-01 (8.3e-01)	9.5e-01 (9.0e-01)	9.8e-01 (8.3e-01)
ENSMUSG00000024587	2.33701e-05	0.996143	0.999474	21.8422	1.80733e-05	0.000397016	0.94392	0.623779	0.813318	2.5772	0.108414	0.339594	2.04149	0.15306	0.420343	9.61246	0.00193262	0.0172097	asparaginyl-tRNA synthetase [Source:MGI Symbol;Acc:MGI:1917473]	18	64499665	64516557	-1	protein_coding	1	Nars	2235	1988	1605	1557	1.43545	1.27681	1.03083	1.28	1.39	1.03	1.12	asparaginyl-tRNA synthetase	4.0e-04 ( 1.8e-05)	1.0e+00 (1.0e+00)	8.1e-01 (6.2e-01)	1.0e+00 (1.0e+00)
ENSMUSG00000020205	0.866036	0.352055	0.882159	21.8003	1.8455e-05	0.000404767	4.13412	0.126557	0.36895	11.405	0.000732478	0.0149365	10.7525	0.00104138	0.0202367	18.4274	1.76498e-05	0.000461558	pleckstrin homology like domain, family A, member 1 [Source:MGI Symbol;Acc:MGI:1096880]	10	111506286	111508645	1	protein_coding	2	Phlda1	1364	469	1364	1709	0.798128	0.274429	0.798128	0.27	1	0.8	2.91	pleckstrin homology like domain, family A, member 1	4.0e-04 ( 1.8e-05)	8.8e-01 (3.5e-01)	3.7e-01 (1.3e-01)	8.8e-01 (3.5e-01)
ENSMUSG00000029833	3.21749	0.0728551	0.629101	21.789	1.85597e-05	0.000406425	17.1002	0.000193528	0.00611653	15.495	8.27242e-05	0.00329596	14.1801	0.000166123	0.00601252	12.0627	0.000514412	0.00628711	tripartite motif-containing 24 [Source:MGI Symbol;Acc:MGI:109275]	6	37870811	37966296	1	protein_coding	8	Trim24	773	1250	658	731	1.05746	1.70999	0.900137	1.71	1.17	0.9	0.62	tripartite motif-containing 24	4.1e-04 ( 1.9e-05)	6.3e-01 (7.3e-02)	6.1e-03 (1.9e-04)	6.3e-01 (7.3e-02)
ENSMUSG00000047412	0.264359	0.607141	0.944873	21.7739	1.87009e-05	0.000408878	0.422246	0.809675	0.912731	3.24817	0.0715034	0.264012	3.12047	0.0773144	0.286456	14.9791	0.000108711	0.00195721	zinc finger and BTB domain containing 44 [Source:MGI Symbol;Acc:MGI:1925123]	9	31030644	31075885	1	protein_coding	6	Zbtb44	803	817	1121	1155	0.695238	0.707359	0.970563	0.71	0.72	0.97	0.98	zinc finger and BTB domain containing 44	4.1e-04 ( 1.9e-05)	9.4e-01 (6.1e-01)	9.1e-01 (8.1e-01)	9.4e-01 (6.1e-01)
ENSMUSG00000041132	9.81891	0.00172726	0.142677	21.7477	1.89477e-05	0.000413627	12.7184	0.00173072	0.0270592	38.4248	5.6904e-10	2.17658e-07	36.6292	1.42872e-09	6.07986e-07	18.5489	1.656e-05	0.00044044	NEDD4 binding protein 2-like 1 [Source:MGI Symbol;Acc:MGI:2140872]	5	150571644	150597188	-1	protein_coding	7	N4bp2l1	2746	4117	3023	2471	1.11129	1.66613	1.22339	1.67	0.91	1.22	0.67	NEDD4 binding protein 2-like 1	4.1e-04 ( 1.9e-05)	1.4e-01 (1.7e-03)	2.7e-02 (1.7e-03)	1.4e-01 (1.7e-03)
ENSMUSG00000073842	1.79596	0.180202	0.781844	21.7388	1.90321e-05	0.000414823	4.09651	0.12896	0.372111	10.0409	0.00153098	0.0242597	9.67954	0.00186332	0.0295065	10.9448	0.000938679	0.00997871	major urinary protein 7 [Source:MGI Symbol;Acc:MGI:3709615]	4	60066469	60070475	-1	protein_coding	3	Mup7	136966	77954	516346	501453	0.273138	0.155456	1.0297	0.16	0.27	1.03	1.76	major urinary protein 7	4.1e-04 ( 1.9e-05)	7.8e-01 (1.8e-01)	3.7e-01 (1.3e-01)	7.8e-01 (1.8e-01)
ENSMUSG00000031595	7.87882	0.00500172	0.251793	21.7306	1.911e-05	0.000415873	22.8078	1.11521e-05	0.000757529	0.79396	0.372905	0.657998	0.609942	0.43481	0.712489	1.3346	0.247989	0.480546	platelet-derived growth factor receptor-like [Source:MGI Symbol;Acc:MGI:1916047]	8	40926212	40990785	1	protein_coding	2	Pdgfrl	164	100	117	36	4.55556	2.77778	3.25	2.78	1.4	3.25	1.64	platelet-derived growth factor receptor-like	4.2e-04 ( 1.9e-05)	2.5e-01 (5.0e-03)	7.6e-04 (1.1e-05)	2.5e-01 (5.0e-03)
ENSMUSG00000028413	0.630675	0.427108	0.905798	21.7253	1.91603e-05	0.00041632	0.698794	0.705113	0.85958	9.96555	0.00159496	0.02494	9.27088	0.00232826	0.0342006	23.1939	1.46458e-06	5.97879e-05	UDP-Gal:betaGlcNAc beta 1,4- galactosyltransferase, polypeptide 1 [Source:MGI Symbol;Acc:MGI:95705]	4	40804602	40854005	-1	protein_coding	2	B4galt1	782	607	842	1199	0.65221	0.506255	0.702252	0.51	0.93	0.7	1.29	UDP-Gal:betaGlcNAc beta 1,4- galactosyltransferase, polypeptide 1	4.2e-04 ( 1.9e-05)	9.1e-01 (4.3e-01)	8.6e-01 (7.1e-01)	9.1e-01 (4.3e-01)
ENSMUSG00000005373	2.39423	0.121784	0.729183	21.6497	1.98991e-05	0.000428494	7.9845	0.0184581	0.123231	5.24273	0.0220387	0.132521	5.58335	0.018132	0.123407	13.6626	0.000218764	0.00328216	MLX interacting protein-like [Source:MGI Symbol;Acc:MGI:1927999]	5	135089890	135138382	1	protein_coding	10	Mlxipl	9040	9298	6529	7517	1.20261	1.23693	0.868565	1.24	1.38	0.87	0.97	MLX interacting protein-like	4.3e-04 ( 2.0e-05)	7.3e-01 (1.2e-01)	1.2e-01 (1.8e-02)	7.3e-01 (1.2e-01)
ENSMUSG00000028937	1.56691	0.210657	0.806517	21.643	1.99656e-05	0.000428494	6.26786	0.0435464	0.204755	2.17604	0.140175	0.394968	2.063	0.150913	0.416688	6.19973	0.012777	0.068327	acyl-CoA thioesterase 7 [Source:MGI Symbol;Acc:MGI:1917275]	4	152178134	152271855	1	protein_coding	6	Acot7	415	570	570	745	0.557047	0.765101	0.765101	0.77	0.73	0.77	0.73	acyl-CoA thioesterase 7	4.3e-04 ( 2.0e-05)	8.1e-01 (2.1e-01)	2.0e-01 (4.4e-02)	8.1e-01 (2.1e-01)
ENSMUSG00000028675	0.00804652	0.928524	0.991088	21.6517	1.98789e-05	0.000428494	3.76702	0.152056	0.408007	4.10024	0.0428771	0.197135	3.51854	0.060686	0.248894	9.14622	0.00249232	0.0208828	proline-rich nuclear receptor coactivator 2 [Source:MGI Symbol;Acc:MGI:106512]	4	135870918	135873850	-1	protein_coding	3	Pnrc2	1298	1033	997	826	1.57143	1.25061	1.20702	1.25	1.3	1.21	1.26	proline-rich nuclear receptor coactivator 2	4.3e-04 ( 2.0e-05)	9.9e-01 (9.3e-01)	4.1e-01 (1.5e-01)	9.9e-01 (9.3e-01)
ENSMUSG00000031753	0.665276	0.414703	0.903529	21.6449	1.9947e-05	0.000428494	2.62163	0.269601	0.546514	18.4336	1.75925e-05	0.00111123	18.1071	2.0882e-05	0.00133288	64.2118	1.11737e-15	6.27651e-13	component of oligomeric golgi complex 4 [Source:MGI Symbol;Acc:MGI:2142808]	8	110846600	110882227	1	protein_coding	14	Cog4	1153	920	1496	1615	0.713932	0.569659	0.926316	0.57	0.77	0.93	1.25	component of oligomeric golgi complex 4	4.3e-04 ( 2.0e-05)	9.0e-01 (4.1e-01)	5.5e-01 (2.7e-01)	9.0e-01 (4.1e-01)
ENSMUSG00000040774	0.640587	0.423498	0.905798	21.6485	1.99105e-05	0.000428494	2.53892	0.280983	0.558598	3.69097	0.0547077	0.227695	3.26448	0.0707956	0.272136	8.22931	0.00412191	0.0306589	choline/ethanolaminephosphotransferase 1 [Source:MGI Symbol;Acc:MGI:2139793]	3	106502260	106547802	-1	protein_coding	7	Cept1	1756	1625	1514	1001	1.75425	1.62338	1.51249	1.62	1.16	1.51	1.08	choline/ethanolaminephosphotransferase 1	4.3e-04 ( 2.0e-05)	9.1e-01 (4.2e-01)	5.6e-01 (2.8e-01)	9.1e-01 (4.2e-01)
ENSMUSG00000021096	5.94079	0.0147944	0.382136	21.6215	2.01815e-05	0.000431803	12.0803	0.00238117	0.0333865	2.19444	0.13851	0.392261	2.5215	0.112304	0.354043	9.16453	0.00246751	0.0207298	protein phosphatase 1A, magnesium dependent, alpha isoform [Source:MGI Symbol;Acc:MGI:99878]	12	72757455	72799819	1	protein_coding	8	Ppm1a	3028	2701	4133	3069	0.986641	0.880091	1.34669	0.88	0.73	1.35	1.12	protein phosphatase 1A, magnesium dependent, alpha isoform	4.3e-04 ( 2.0e-05)	3.8e-01 (1.5e-02)	3.3e-02 (2.4e-03)	3.8e-01 (1.5e-02)
ENSMUSG00000032536	0.675084	0.411285	0.901709	21.61	2.02977e-05	0.000433626	13.8807	0.000967935	0.0182457	0.740879	0.389379	0.671646	0.58604	0.443955	0.719293	3.40919	0.0648344	0.207019	trafficking protein, kinesin binding 1 [Source:MGI Symbol;Acc:MGI:1914345]	9	121297502	121474918	1	protein_coding	14	Trak1	1305	1606	1606	2109	0.618777	0.761498	0.761498	0.76	0.81	0.76	0.81	trafficking protein, kinesin binding 1	4.3e-04 ( 2.0e-05)	9.0e-01 (4.1e-01)	1.8e-02 (9.7e-04)	9.0e-01 (4.1e-01)
ENSMUSG00000051285	6.34817	0.0117502	0.356628	21.4895	2.15588e-05	0.000459866	6.79525	0.0334526	0.174275	1.32668	0.249396	0.532845	1.70172	0.192063	0.471694	7.2935	0.00692044	0.0441744	protein-L-isoaspartate (D-aspartate) O-methyltransferase domain containing 1 [Source:MGI Symbol;Acc:MGI:2441773]	1	7088920	7173628	1	protein_coding	8	Pcmtd1	1837	2077	2591	2222	0.826733	0.934743	1.16607	0.93	0.71	1.17	0.88	protein-L-isoaspartate (D-aspartate) O-methyltransferase domain containing 1	4.6e-04 ( 2.2e-05)	3.6e-01 (1.2e-02)	1.7e-01 (3.3e-02)	3.6e-01 (1.2e-02)
ENSMUSG00000034800	7.33049	0.00677947	0.288037	21.4831	2.16278e-05	0.000460635	7.4965	0.0235589	0.142772	11.2906	0.000779024	0.0155017	8.24237	0.00409237	0.0482934	9.11459	0.00253579	0.0211587	zinc finger protein 661 [Source:MGI Symbol;Acc:MGI:1919430]	2	127574662	127587094	-1	protein_coding	4	Zfp661	108	67	113	151	0.715232	0.443709	0.748344	0.44	0.96	0.75	1.61	zinc finger protein 661	4.6e-04 ( 2.2e-05)	2.9e-01 (6.8e-03)	1.4e-01 (2.4e-02)	2.9e-01 (6.8e-03)
ENSMUSG00000047126	0.982729	0.321526	0.864895	21.4652	2.18213e-05	0.000464051	2.9914	0.224092	0.495061	3.29267	0.0695899	0.260607	2.44315	0.118039	0.362685	7.75041	0.00537005	0.03684	clathrin, heavy polypeptide (Hc) [Source:MGI Symbol;Acc:MGI:2388633]	11	86694351	86757565	-1	protein_coding	6	Cltc	3680	3403	2947	2486	1.48029	1.36887	1.18544	1.37	1.25	1.19	1.08	clathrin, heavy polypeptide (Hc)	4.6e-04 ( 2.2e-05)	8.6e-01 (3.2e-01)	5.0e-01 (2.2e-01)	8.6e-01 (3.2e-01)
ENSMUSG00000022674	7.4158	0.00646536	0.283258	21.4458	2.2034e-05	0.000467324	10.915	0.00426422	0.0493542	3.15558	0.0756677	0.273187	2.75949	0.0966791	0.326263	7.41073	0.0064836	0.0420294	ubiquitin-conjugating enzyme E2 variant 2 [Source:MGI Symbol;Acc:MGI:1917870]	16	15552077	15595773	-1	protein_coding	6	Ube2v2	634	640	630	455	1.39341	1.40659	1.38462	1.41	1.01	1.38	0.99	ubiquitin-conjugating enzyme E2 variant 2	4.7e-04 ( 2.2e-05)	2.8e-01 (6.5e-03)	4.9e-02 (4.3e-03)	2.8e-01 (6.5e-03)
ENSMUSG00000035031	0.567543	0.451237	0.910523	21.4451	2.2042e-05	0.000467324	1.38253	0.500942	0.735052	10.4426	0.00123143	0.0212224	11.7402	0.000611634	0.0141269	21.6674	3.24256e-06	0.000116757	complement component 8, alpha polypeptide [Source:MGI Symbol;Acc:MGI:2668347]	4	104815679	104876398	-1	protein_coding	4	C8a	11366	8720	13435	16275	0.698372	0.535791	0.825499	0.54	0.85	0.83	1.3	complement component 8, alpha polypeptide	4.7e-04 ( 2.2e-05)	9.1e-01 (4.5e-01)	7.4e-01 (5.0e-01)	9.1e-01 (4.5e-01)
ENSMUSG00000074890	0.172177	0.678184	0.953588	21.4324	2.21824e-05	0.000468421	20.4497	3.62577e-05	0.0018316	13.3564	0.000257541	0.00722269	12.7225	0.000361287	0.00996768	14.595	0.000133267	0.00225751	leucine carboxyl methyltransferase 2 [Source:MGI Symbol;Acc:MGI:1353659]	2	121128307	121140653	-1	protein_coding	2	Lcmt2	277	401	221	266	1.04135	1.50752	0.830827	1.51	1.25	0.83	0.69	leucine carboxyl methyltransferase 2	4.7e-04 ( 2.2e-05)	9.5e-01 (6.8e-01)	1.8e-03 (3.6e-05)	9.5e-01 (6.8e-01)
ENSMUSG00000036501	0.143325	0.704998	0.960001	21.4314	2.21942e-05	0.000468421	5.13034	0.0769061	0.284226	12.3837	0.000433103	0.0104628	14.0251	0.000180391	0.00638092	23.5611	1.21007e-06	5.13385e-05	family with sequence similarity 13, member B [Source:MGI Symbol;Acc:MGI:2447834]	18	34442352	34506823	-1	protein_coding	1	Fam13b	319	370	238	209	1.52632	1.77033	1.13876	1.77	1.34	1.14	0.86	family with sequence similarity 13, member B	4.7e-04 ( 2.2e-05)	9.6e-01 (7.0e-01)	2.8e-01 (7.7e-02)	9.6e-01 (7.0e-01)
ENSMUSG00000005982	0.528941	0.467052	0.914144	21.4344	2.216e-05	0.000468421	0.706267	0.702483	0.858202	2.47986	0.115313	0.351736	2.61196	0.10606	0.342865	11.7385	0.0006122	0.0071805	N(alpha)-acetyltransferase 60, NatF catalytic subunit [Source:MGI Symbol;Acc:MGI:1922013]	16	3872375	3904780	1	protein_coding	12	Naa60	1927	1859	2343	2593	0.743155	0.71693	0.903587	0.72	0.82	0.9	1.04	N(alpha)-acetyltransferase 60, NatF catalytic subunit	4.7e-04 ( 2.2e-05)	9.1e-01 (4.7e-01)	8.6e-01 (7.0e-01)	9.1e-01 (4.7e-01)
ENSMUSG00000036057	0.17422	0.676389	0.953588	21.4159	2.23665e-05	0.000471348	23.6009	7.50119e-06	0.000547746	18.0428	2.15999e-05	0.00129318	18.2098	1.97857e-05	0.00126873	20.2347	6.85005e-06	0.000219123	protein tyrosine phosphatase, non-receptor type 23 [Source:MGI Symbol;Acc:MGI:2144837]	9	110385082	110408213	-1	protein_coding	4	Ptpn23	393	675	338	430	0.913953	1.56977	0.786047	1.57	1.16	0.79	0.58	protein tyrosine phosphatase, non-receptor type 23	4.7e-04 ( 2.2e-05)	9.5e-01 (6.8e-01)	5.5e-04 (7.5e-06)	9.5e-01 (6.8e-01)
ENSMUSG00000018765	4.24764	0.0393048	0.534494	21.373	2.28516e-05	0.000480208	15.1163	0.000521853	0.0118585	15.9449	6.52147e-05	0.00282392	15.6594	7.58328e-05	0.00350755	18.2562	1.93093e-05	0.000501221	fragile X mental retardation, autosomal homolog 2 [Source:MGI Symbol;Acc:MGI:1346074]	11	69632990	69653297	1	protein_coding	6	Fxr2	1148	1511	1018	1087	1.05612	1.39006	0.936523	1.39	1.13	0.94	0.76	fragile X mental retardation, autosomal homolog 2	4.8e-04 ( 2.3e-05)	5.3e-01 (3.9e-02)	1.2e-02 (5.2e-04)	5.3e-01 (3.9e-02)
ENSMUSG00000012429	6.25369	0.0123935	0.360426	21.3726	2.28556e-05	0.000480208	6.78388	0.0336433	0.174785	16.2424	5.57313e-05	0.00249974	12.8606	0.000335581	0.00952551	12.6921	0.000367197	0.00483729	M-phase specific PLK1 intereacting protein [Source:MGI Symbol;Acc:MGI:1913558]	13	17695192	17699748	1	protein_coding	3	Mplkip	253	195	253	315	0.803175	0.619048	0.803175	0.62	1	0.8	1.3	M-phase specific PLK1 intereacting protein	4.8e-04 ( 2.3e-05)	3.6e-01 (1.2e-02)	1.7e-01 (3.4e-02)	3.6e-01 (1.2e-02)
ENSMUSG00000054405	0.0467386	0.828839	0.980048	21.2201	2.46666e-05	0.000516706	0.506267	0.776364	0.896046	5.99035	0.0143844	0.102469	5.83264	0.0157315	0.113508	12.8786	0.000332358	0.00449212	DnaJ heat shock protein family (Hsp40) member C8 [Source:MGI Symbol;Acc:MGI:1915848]	4	132535550	132553742	1	protein_coding	12	Dnajc8	518	500	645	730	0.709589	0.684932	0.883562	0.68	0.8	0.88	1.04	DnaJ heat shock protein family (Hsp40) member C8	5.2e-04 ( 2.5e-05)	9.8e-01 (8.3e-01)	9.0e-01 (7.8e-01)	9.8e-01 (8.3e-01)
ENSMUSG00000029771	1.87976	0.170361	0.776539	21.2027	2.48829e-05	0.000520458	4.03547	0.132957	0.378835	21.1772	4.18717e-06	0.000360833	19.1819	1.18835e-05	0.000847106	16.8158	4.1188e-05	0.000923967	interferon regulatory factor 5 [Source:MGI Symbol;Acc:MGI:1350924]	6	29526625	29541871	1	protein_coding	6	Irf5	270	188	295	311	0.868167	0.604502	0.948553	0.6	0.92	0.95	1.44	interferon regulatory factor 5	5.2e-04 ( 2.5e-05)	7.8e-01 (1.7e-01)	3.8e-01 (1.3e-01)	7.8e-01 (1.7e-01)
ENSMUSG00000020077	5.18029	0.0228445	0.440041	21.1866	2.50836e-05	0.000523092	5.71365	0.0574509	0.238894	12.6629	0.000372988	0.00945863	9.17876	0.0024484	0.0355195	20.2969	6.63077e-06	0.00021406	serglycin [Source:MGI Symbol;Acc:MGI:97756]	10	62493833	62527451	-1	protein_coding	6	Srgn	243	332	234	188	1.29255	1.76596	1.24468	1.77	1.04	1.24	0.73	serglycin	5.2e-04 ( 2.5e-05)	4.4e-01 (2.3e-02)	2.4e-01 (5.7e-02)	4.4e-01 (2.3e-02)
ENSMUSG00000025350	0.721061	0.395796	0.895695	21.1876	2.50712e-05	0.000523092	1.0065	0.604563	0.801939	15.2628	9.35405e-05	0.00357793	15.7342	7.2895e-05	0.00341222	26.12	3.20842e-07	1.72628e-05	retinol dehydrogenase 5 [Source:MGI Symbol;Acc:MGI:1201412]	10	128913593	128922888	-1	protein_coding	7	Rdh5	324	296	412	500	0.648	0.592	0.824	0.59	0.79	0.82	1.09	retinol dehydrogenase 5	5.2e-04 ( 2.5e-05)	9.0e-01 (4.0e-01)	8.0e-01 (6.0e-01)	9.0e-01 (4.0e-01)
ENSMUSG00000050332	1.50241	0.2203	0.813851	21.1724	2.52627e-05	0.000526044	6.7983	0.0334016	0.17412	3.25681	0.0711274	0.263357	2.22246	0.136016	0.392211	7.40145	0.00651715	0.0421558	APC membrane recruitment 1 [Source:MGI Symbol;Acc:MGI:1919595]	X	95420318	95444872	-1	protein_coding	1	Amer1	68	69	81	168	0.404762	0.410714	0.482143	0.41	0.84	0.48	0.99	APC membrane recruitment 1	5.3e-04 ( 2.5e-05)	8.1e-01 (2.2e-01)	1.7e-01 (3.3e-02)	8.1e-01 (2.2e-01)
ENSMUSG00000027796	1.52211	0.217301	0.810105	21.161	2.54062e-05	0.000527461	1.5324	0.464776	0.710696	11.5967	0.000660687	0.0140063	8.9875	0.00271833	0.037833	9.83407	0.00171309	0.0157854	SMAD family member 9 [Source:MGI Symbol;Acc:MGI:1859993]	3	54755582	54801257	1	protein_coding	1	Smad9	230	152	273	372	0.61828	0.408602	0.733871	0.41	0.84	0.73	1.51	SMAD family member 9	5.3e-04 ( 2.5e-05)	8.1e-01 (2.2e-01)	7.1e-01 (4.6e-01)	8.1e-01 (2.2e-01)
ENSMUSG00000024570	0.455908	0.499543	0.923766	21.1625	2.53871e-05	0.000527461	1.29251	0.524005	0.750126	8.21959	0.00414405	0.0468933	7.30361	0.00688164	0.0687821	27.9537	1.24256e-07	7.61026e-06	ribosome binding factor A [Source:MGI Symbol;Acc:MGI:1915981]	18	80192265	80200658	-1	protein_coding	1	Rbfa	838	697	874	1092	0.767399	0.638278	0.800366	0.64	0.96	0.8	1.2	ribosome binding factor A	5.3e-04 ( 2.5e-05)	9.2e-01 (5.0e-01)	7.5e-01 (5.2e-01)	9.2e-01 (5.0e-01)
ENSMUSG00000022032	0.6798	0.409656	0.901312	21.1543	2.54925e-05	0.000528469	3.25011	0.1969	0.463765	5.03032	0.0249073	0.143591	4.99385	0.0254375	0.149966	9.93415	0.00162241	0.0151351	scavenger receptor class A, member 5 [Source:MGI Symbol;Acc:MGI:1918395]	14	65666403	65764826	1	protein_coding	3	Scara5	37	47	196	741	0.0499325	0.0634278	0.264507	0.06	0.19	0.26	0.79	scavenger receptor class A, member 5	5.3e-04 ( 2.5e-05)	9.0e-01 (4.1e-01)	4.6e-01 (2.0e-01)	9.0e-01 (4.1e-01)
ENSMUSG00000022010	17.4392	2.96651e-05	0.0134949	21.1473	2.55811e-05	0.000528739	23.6009	7.50125e-06	0.000547746	1.10354	0.293492	0.583424	1.12865	0.288063	0.584238	0.000325641	0.985603	0.994169	TSC22 domain family, member 1 [Source:MGI Symbol;Acc:MGI:109127]	14	76414961	76507765	1	protein_coding	16	Tsc22d1	1446	835	904	1021	1.41626	0.817826	0.885406	0.82	1.6	0.89	1.73	TSC22 domain family, member 1	5.3e-04 ( 2.6e-05)	1.3e-02 (3.0e-05)	5.5e-04 (7.5e-06)	1.3e-02 (3.0e-05)
ENSMUSG00000035376	3.97383	0.0462126	0.566642	21.1478	2.55752e-05	0.000528739	11.8156	0.00271815	0.0366426	2.76578	0.0962999	0.317389	2.16135	0.14152	0.401342	6.46573	0.0109974	0.0616761	3-hydroxyacyl-CoA dehydratase 2 [Source:MGI Symbol;Acc:MGI:1918007]	16	35022428	35109177	1	protein_coding	3	Hacd2	3040	2797	2797	1898	1.60169	1.47366	1.47366	1.47	1.09	1.47	1.09	3-hydroxyacyl-CoA dehydratase 2	5.3e-04 ( 2.6e-05)	5.7e-01 (4.6e-02)	3.7e-02 (2.7e-03)	5.7e-01 (4.6e-02)
ENSMUSG00000027552	0.0472449	0.827929	0.979708	21.1376	2.57052e-05	0.00053052	1.80756	0.405036	0.668673	2.39851	0.121451	0.362458	1.7206	0.189616	0.468426	8.94205	0.0027868	0.0227927	E2F transcription factor 5 [Source:MGI Symbol;Acc:MGI:105091]	3	14578641	14606309	1	protein_coding	2	E2f5	137	151	182	239	0.573222	0.631799	0.761506	0.63	0.75	0.76	0.91	E2F transcription factor 5	5.3e-04 ( 2.6e-05)	9.8e-01 (8.3e-01)	6.7e-01 (4.1e-01)	9.8e-01 (8.3e-01)
ENSMUSG00000003477	9.66129	0.00188191	0.151581	21.1091	2.60749e-05	0.000536567	23.5624	7.64693e-06	0.000551564	13.6425	0.000221128	0.00654241	13.0524	0.000302895	0.00897207	11.705	0.000623338	0.00726407	indolethylamine N-methyltransferase [Source:MGI Symbol;Acc:MGI:102963]	6	55170626	55175043	-1	protein_coding	2	Inmt	21917	7918	18528	18328	1.19582	0.432017	1.01091	0.43	1.18	1.01	2.77	indolethylamine N-methyltransferase	5.4e-04 ( 2.6e-05)	1.5e-01 (1.9e-03)	5.5e-04 (7.6e-06)	1.5e-01 (1.9e-03)
ENSMUSG00000021226	2.94784	0.0859924	0.656005	21.0695	2.65959e-05	0.000544886	9.72909	0.00771532	0.0723596	66.6705	3.20902e-16	5.52353e-13	84.5239	3.7959e-20	1.35442e-16	58.7552	1.7856e-14	8.08875e-12	acyl-CoA thioesterase 2 [Source:MGI Symbol;Acc:MGI:2159605]	12	83987861	83993873	1	protein_coding	1	Acot2	341	838	213	198	1.72222	4.23232	1.07576	4.23	1.6	1.08	0.41	acyl-CoA thioesterase 2	5.4e-04 ( 2.7e-05)	6.6e-01 (8.6e-02)	7.2e-02 (7.7e-03)	6.6e-01 (8.6e-02)
ENSMUSG00000018449	1.60256	0.205541	0.80363	21.0424	2.69582e-05	0.0005515	8.56755	0.0137905	0.104478	12.6717	0.000371236	0.00943664	11.7084	0.000622183	0.0142735	21.7622	3.08627e-06	0.000111991	RPA interacting protein [Source:MGI Symbol;Acc:MGI:1916973]	11	70970213	70977833	1	protein_coding	13	Rpain	527	383	577	606	0.869637	0.632013	0.952145	0.63	0.91	0.95	1.38	RPA interacting protein	5.5e-04 ( 2.7e-05)	8.0e-01 (2.1e-01)	1.0e-01 (1.4e-02)	8.0e-01 (2.1e-01)
ENSMUSG00000000056	0.376873	0.539282	0.933709	21.0043	2.74769e-05	0.000559656	3.85742	0.145335	0.398227	10.3256	0.00131199	0.0218718	10.6696	0.00108913	0.0208943	25.9003	3.59517e-07	1.88722e-05	nuclear prelamin A recognition factor [Source:MGI Symbol;Acc:MGI:1914858]	11	121237253	121255856	1	protein_coding	3	Narf	884	736	1255	1278	0.691706	0.5759	0.982003	0.58	0.7	0.98	1.2	nuclear prelamin A recognition factor	5.6e-04 ( 2.7e-05)	9.3e-01 (5.4e-01)	4.0e-01 (1.5e-01)	9.3e-01 (5.4e-01)
ENSMUSG00000044349	2.24845	0.133748	0.746792	21.0065	2.7447e-05	0.000559656	2.96245	0.227359	0.499	7.19476	0.00731168	0.0686365	6.68899	0.00970102	0.0854651	12.2086	0.000475701	0.00587019	small nucleolar RNA host gene 11 [Source:MGI Symbol;Acc:MGI:2441845]	2	158375638	158386145	1	protein_coding	5	Snhg11	172	235	140	115	1.49565	2.04348	1.21739	2.04	1.23	1.22	0.73	small nucleolar RNA host gene 11	5.6e-04 ( 2.7e-05)	7.5e-01 (1.3e-01)	5.0e-01 (2.3e-01)	7.5e-01 (1.3e-01)
ENSMUSG00000037887	6.75813	0.00933216	0.323566	21	2.75358e-05	0.000560041	12.6826	0.00176204	0.0274263	25.9668	3.47333e-07	5.23373e-05	23.5942	1.18946e-06	0.000160611	25.6009	4.19846e-07	2.12848e-05	dual specificity phosphatase 8 [Source:MGI Symbol;Acc:MGI:106626]	7	142079490	142095843	-1	protein_coding	2	Dusp8	47	308	26	8	5.875	38.5	3.25	38.5	1.81	3.25	0.15	dual specificity phosphatase 8	5.6e-04 ( 2.8e-05)	3.2e-01 (9.3e-03)	2.7e-02 (1.8e-03)	3.2e-01 (9.3e-03)
ENSMUSG00000023963	1.03154	0.309797	0.861937	20.924	2.8603e-05	0.000580061	3.52957	0.171224	0.431627	14.5235	0.000138421	0.00477708	13.6723	0.000217639	0.00725962	27.0566	1.97579e-07	1.10542e-05	cytochrome P450, family 39, subfamily a, polypeptide 1 [Source:MGI Symbol;Acc:MGI:1927096]	17	43667425	43751431	1	protein_coding	1	Cyp39a1	1526	2151	1303	944	1.61653	2.2786	1.3803	2.28	1.17	1.38	0.71	cytochrome P450, family 39, subfamily a, polypeptide 1	5.8e-04 ( 2.9e-05)	8.6e-01 (3.1e-01)	4.3e-01 (1.7e-01)	8.6e-01 (3.1e-01)
ENSMUSG00000003518	5.4394	0.0196875	0.412089	20.8423	2.97961e-05	0.000602509	8.06251	0.017752	0.120702	19.8572	8.34498e-06	0.000624513	20.2075	6.94783e-06	0.000567258	20.3463	6.46185e-06	0.00020957	dual specificity phosphatase 3 (vaccinia virus phosphatase VH1-related) [Source:MGI Symbol;Acc:MGI:1919599]	11	101971143	101987013	-1	protein_coding	7	Dusp3	1437	2079	1437	1220	1.17787	1.7041	1.17787	1.7	1	1.18	0.69	dual specificity phosphatase 3 (vaccinia virus phosphatase VH1-related)	6.0e-04 ( 3.0e-05)	4.1e-01 (2.0e-02)	1.2e-01 (1.8e-02)	4.1e-01 (2.0e-02)
ENSMUSG00000020620	0.276897	0.598742	0.944377	20.8113	3.02605e-05	0.000611018	1.54234	0.462471	0.709315	11.9748	0.000539259	0.0120959	10.9231	0.000949716	0.0189444	19.5062	1.00276e-05	0.000294598	ATP-binding cassette, sub-family A (ABC1), member 8b [Source:MGI Symbol;Acc:MGI:1351668]	11	109932190	109995845	-1	protein_coding	2	Abca8b	1311	1469	1122	1034	1.26789	1.4207	1.08511	1.42	1.17	1.09	0.89	ATP-binding cassette, sub-family A (ABC1), member 8b	6.1e-04 ( 3.0e-05)	9.4e-01 (6.0e-01)	7.1e-01 (4.6e-01)	9.4e-01 (6.0e-01)
ENSMUSG00000027397	10.4583	0.00122101	0.122528	20.7929	3.05409e-05	0.00061579	39.5872	2.53361e-09	1.0249e-06	36.7318	1.35548e-09	4.44405e-07	34.7062	3.83416e-09	1.43273e-06	16.0188	6.27165e-05	0.00127273	solute carrier family 20, member 1 [Source:MGI Symbol;Acc:MGI:108392]	2	129198764	129211616	1	protein_coding	8	Slc20a1	693	1339	693	812	0.853448	1.64901	0.853448	1.65	1	0.85	0.52	solute carrier family 20, member 1	6.2e-04 ( 3.1e-05)	1.2e-01 (1.2e-03)	1.0e-06 (2.5e-09)	1.2e-01 (1.2e-03)
ENSMUSG00000021069	4.28395	0.0384739	0.531838	20.7795	3.0746e-05	0.000619035	7.84685	0.0197732	0.127918	0.0923694	0.761186	0.902103	0.0797103	0.77769	0.91032	2.47873	0.115396	0.302126	liver glycogen phosphorylase [Source:MGI Symbol;Acc:MGI:97829]	12	70190811	70231488	-1	protein_coding	6	Pygl	15001	9623	8948	8576	1.74918	1.12208	1.04338	1.12	1.68	1.04	1.56	liver glycogen phosphorylase	6.2e-04 ( 3.1e-05)	5.3e-01 (3.8e-02)	1.3e-01 (2.0e-02)	5.3e-01 (3.8e-02)
ENSMUSG00000064341	0.175259	0.67548	0.953588	20.7492	3.12152e-05	0.000627578	2.8961	0.235029	0.507777	6.30512	0.012039	0.0921494	5.27363	0.0216508	0.136464	21.5981	3.36177e-06	0.00012074	mitochondrially encoded NADH dehydrogenase 1 [Source:MGI Symbol;Acc:MGI:101787]	MT	2751	3707	1	protein_coding	1	mt-Nd1	178837	220024	130749	144977	1.23355	1.51765	0.90186	1.52	1.37	0.9	0.81	mitochondrially encoded NADH dehydrogenase 1	6.3e-04 ( 3.1e-05)	9.5e-01 (6.8e-01)	5.1e-01 (2.4e-01)	9.5e-01 (6.8e-01)
ENSMUSG00000030108	0.333766	0.56345	0.936478	20.6997	3.19983e-05	0.000641478	0.942949	0.624081	0.81341	5.67301	0.0172279	0.11489	5.81358	0.0159029	0.114221	20.0922	7.37974e-06	0.000233936	solute carrier family 6 (neurotransmitter transporter, GABA), member 13 [Source:MGI Symbol;Acc:MGI:95629]	6	121300227	121337733	1	protein_coding	4	Slc6a13	5654	5866	4529	4626	1.22222	1.26805	0.979032	1.27	1.25	0.98	0.96	solute carrier family 6 (neurotransmitter transporter, GABA), member 13	6.4e-04 ( 3.2e-05)	9.4e-01 (5.6e-01)	8.1e-01 (6.2e-01)	9.4e-01 (5.6e-01)
ENSMUSG00000053411	1.1861	0.276118	0.849668	20.6856	3.22245e-05	0.000645089	1.48197	0.476644	0.718716	2.07274	0.149952	0.408807	1.82632	0.176562	0.454447	7.00972	0.00810684	0.049326	chromobox 7 [Source:MGI Symbol;Acc:MGI:1196439]	15	79915807	79971119	-1	protein_coding	9	Cbx7	217	272	292	350	0.62	0.777143	0.834286	0.78	0.74	0.83	0.8	chromobox 7	6.5e-04 ( 3.2e-05)	8.5e-01 (2.8e-01)	7.2e-01 (4.8e-01)	8.5e-01 (2.8e-01)
ENSMUSG00000032369	7.09447	0.0077322	0.299932	20.6721	3.24425e-05	0.000648525	7.49128	0.0236205	0.142959	15.2385	9.47521e-05	0.00359766	12.2099	0.000475376	0.0119636	8.10182	0.00442208	0.0321092	phospholipid scramblase 1 [Source:MGI Symbol;Acc:MGI:893575]	9	92249750	92272278	1	protein_coding	3	Plscr1	268	234	292	408	0.656863	0.573529	0.715686	0.57	0.92	0.72	1.15	phospholipid scramblase 1	6.5e-04 ( 3.2e-05)	3.0e-01 (7.7e-03)	1.4e-01 (2.4e-02)	3.0e-01 (7.7e-03)
ENSMUSG00000063445	0.0970986	0.75534	0.967304	20.65	3.28021e-05	0.000654779	0.0972075	0.952559	0.979268	2.87473	0.08998	0.304055	2.46753	0.116221	0.360268	16.8659	4.01167e-05	0.000904268	NmrA-like family domain containing 1 [Source:MGI Symbol;Acc:MGI:1915074]	16	4710059	4719356	-1	protein_coding	6	Nmral1	234	256	167	130	1.8	1.96923	1.28462	1.97	1.4	1.28	0.91	NmrA-like family domain containing 1	6.5e-04 ( 3.3e-05)	9.7e-01 (7.6e-01)	9.8e-01 (9.5e-01)	9.7e-01 (7.6e-01)
ENSMUSG00000037583	5.81869	0.0158568	0.389684	20.6091	3.34801e-05	0.000666411	31.154	1.71787e-07	2.78094e-05	0.273845	0.600764	0.817604	0.517338	0.47198	0.740312	0.819986	0.365184	0.604964	nuclear receptor subfamily 0, group B, member 2 [Source:MGI Symbol;Acc:MGI:1346344]	4	133553376	133556536	1	protein_coding	1	Nr0b2	1318	541	615	497	2.65191	1.08853	1.23742	1.09	2.14	1.24	2.44	nuclear receptor subfamily 0, group B, member 2	6.7e-04 ( 3.3e-05)	3.9e-01 (1.6e-02)	2.8e-05 (1.7e-07)	3.9e-01 (1.6e-02)
ENSMUSG00000046160	0.852425	0.355867	0.882686	20.5838	3.39062e-05	0.000672979	1.03738	0.595299	0.795058	7.58523	0.00588484	0.0585422	7.42103	0.0064466	0.0657919	31.7103	1.78974e-08	1.48718e-06	oligodendrocyte transcription factor 1 [Source:MGI Symbol;Acc:MGI:1355334]	16	91269772	91271933	1	protein_coding	1	Olig1	64	51	99	157	0.407643	0.324841	0.630573	0.32	0.65	0.63	1.25	oligodendrocyte transcription factor 1	6.7e-04 ( 3.4e-05)	8.8e-01 (3.6e-01)	8.0e-01 (6.0e-01)	8.8e-01 (3.6e-01)
ENSMUSG00000001323	0.097321	0.755069	0.967288	20.5358	3.47298e-05	0.000688348	2.44786	0.294072	0.57295	6.93466	0.00845413	0.0743381	6.34241	0.0117885	0.0951336	11.9588	0.000543898	0.00658445	serine racemase [Source:MGI Symbol;Acc:MGI:1351636]	11	74906359	74925948	-1	protein_coding	10	Srr	2630	2992	2128	2201	1.19491	1.35938	0.966833	1.36	1.24	0.97	0.88	serine racemase	6.9e-04 ( 3.5e-05)	9.7e-01 (7.6e-01)	5.7e-01 (2.9e-01)	9.7e-01 (7.6e-01)
ENSMUSG00000028603	3.41088	0.0647679	0.616946	20.5225	3.49628e-05	0.000691987	5.80845	0.0547913	0.232473	9.53437	0.00201659	0.0292916	9.18901	0.00243473	0.0354253	25.6587	4.07444e-07	2.08823e-05	sterol carrier protein 2, liver [Source:MGI Symbol;Acc:MGI:98254]	4	108043839	108144998	-1	protein_coding	9	Scp2	57542	42021	59808	67086	0.857735	0.626375	0.891512	0.63	0.96	0.89	1.37	sterol carrier protein 2, liver	6.9e-04 ( 3.5e-05)	6.2e-01 (6.5e-02)	2.3e-01 (5.5e-02)	6.2e-01 (6.5e-02)
ENSMUSG00000037071	1.16867	0.279675	0.849668	20.5162	3.50718e-05	0.000693164	1.60717	0.44772	0.699604	3.71438	0.0539455	0.225939	3.48324	0.0619934	0.2522	15.1436	9.96356e-05	0.00182423	stearoyl-Coenzyme A desaturase 1 [Source:MGI Symbol;Acc:MGI:98239]	19	44394451	44407709	-1	protein_coding	1	Scd1	28931	18265	46445	126647	0.228438	0.14422	0.366728	0.14	0.62	0.37	1.58	stearoyl-Coenzyme A desaturase 1	6.9e-04 ( 3.5e-05)	8.5e-01 (2.8e-01)	7.0e-01 (4.5e-01)	8.5e-01 (2.8e-01)
ENSMUSG00000071226	3.56989	0.0588362	0.601542	20.5121	3.5145e-05	0.000693631	32.8967	7.18747e-08	1.43677e-05	20.8474	4.97368e-06	0.000415076	19.249	1.14728e-05	0.000834778	13.1089	0.000293888	0.00412708	CECR2, histone acetyl-lysine reader [Source:MGI Symbol;Acc:MGI:1923799]	6	120666369	120771190	1	protein_coding	8	Cecr2	348	641	348	401	0.86783	1.5985	0.86783	1.6	1	0.87	0.54	CECR2, histone acetyl-lysine reader	6.9e-04 ( 3.5e-05)	6.0e-01 (5.9e-02)	1.4e-05 (7.2e-08)	6.0e-01 (5.9e-02)
ENSMUSG00000034173	0.163519	0.685937	0.956313	20.487	3.55881e-05	0.000701386	34.4795	3.25746e-08	7.35187e-06	0.0495962	0.823767	0.930259	0.0012474	0.971826	0.989902	1.0204	0.312424	0.552555	zinc finger, BED type containing 5 [Source:MGI Symbol;Acc:MGI:1919220]	5	129895723	129903623	1	protein_coding	3	Zbed5	56	124	106	233	0.240343	0.532189	0.454936	0.53	0.53	0.45	0.45	zinc finger, BED type containing 5	7.0e-04 ( 3.6e-05)	9.6e-01 (6.9e-01)	7.4e-06 (3.3e-08)	9.6e-01 (6.9e-01)
ENSMUSG00000023829	0.396986	0.52865	0.930657	20.4797	3.57184e-05	0.000702965	1.64732	0.438822	0.692067	2.01428	0.155825	0.416644	1.74708	0.186244	0.465309	5.76635	0.0163359	0.0807765	solute carrier family 22 (organic cation transporter), member 1 [Source:MGI Symbol;Acc:MGI:108111]	17	12648874	12675838	-1	protein_coding	1	Slc22a1	17007	17053	13303	11667	1.4577	1.46164	1.14022	1.46	1.28	1.14	1	solute carrier family 22 (organic cation transporter), member 1	7.0e-04 ( 3.6e-05)	9.3e-01 (5.3e-01)	6.9e-01 (4.4e-01)	9.3e-01 (5.3e-01)
ENSMUSG00000050423	13.4865	0.000240288	0.0535331	20.43	3.66166e-05	0.00071862	32.6796	8.01162e-08	1.53571e-05	25.9539	3.49675e-07	5.23373e-05	25.4032	4.6514e-07	7.86983e-05	18.8413	1.42061e-05	0.000392709	protein phosphatase 1, regulatory (inhibitor) subunit 3G [Source:MGI Symbol;Acc:MGI:1923737]	13	35958839	35970388	1	protein_coding	3	Ppp1r3g	119	3194	138	388	0.306701	8.23196	0.35567	8.23	0.86	0.36	0.04	protein phosphatase 1, regulatory (inhibitor) subunit 3G	7.2e-04 ( 3.7e-05)	5.4e-02 (2.4e-04)	1.5e-05 (8.0e-08)	5.4e-02 (2.4e-04)
ENSMUSG00000033446	4.55252	0.0328703	0.503908	20.4307	3.66048e-05	0.00071862	4.65528	0.0975258	0.321546	16.8969	3.9466e-05	0.00197617	15.6625	7.57093e-05	0.00350755	11.9216	0.000554859	0.00667963	lysophosphatidic acid receptor 6 [Source:MGI Symbol;Acc:MGI:1914418]	14	73237895	73243294	1	protein_coding	1	Lpar6	347	240	347	457	0.7593	0.525164	0.7593	0.53	1	0.76	1.45	lysophosphatidic acid receptor 6	7.2e-04 ( 3.7e-05)	5.0e-01 (3.3e-02)	3.2e-01 (9.8e-02)	5.0e-01 (3.3e-02)
ENSMUSG00000103766	0.159133	0.689956	0.95716	20.423	3.67448e-05	0.000720125	0.818629	0.664105	0.83643	3.32493	0.0682368	0.257149	2.43077	0.118975	0.364318	13.5007	0.00023847	0.00349931	predicted gene, 38392 [Source:MGI Symbol;Acc:MGI:5613632]	3	88243380	88287210	-1	protein_coding	2	Gm38392	199	197	122	86	2.31395	2.2907	1.4186	2.29	1.63	1.42	1.01	predicted gene, 38392	7.2e-04 ( 3.7e-05)	9.6e-01 (6.9e-01)	8.4e-01 (6.6e-01)	9.6e-01 (6.9e-01)
ENSMUSG00000079427	0.1258	0.722827	0.963336	20.4003	3.71644e-05	0.000726315	13.9522	0.00093392	0.0178454	12.6869	0.000368232	0.00938992	12.8266	0.000341731	0.00962845	13.781	0.000205407	0.00314562	5, 10-methenyltetrahydrofolate synthetase-like [Source:MGI Symbol;Acc:MGI:3780550]	9	88688602	88720296	-1	protein_coding	7	Mthfsl	597	482	769	700	0.852857	0.688571	1.09857	0.69	0.78	1.1	1.24	5, 10-methenyltetrahydrofolate synthetase-like	7.3e-04 ( 3.7e-05)	9.6e-01 (7.2e-01)	1.8e-02 (9.3e-04)	9.6e-01 (7.2e-01)
ENSMUSG00000020865	0.441129	0.506578	0.925257	20.3783	3.75765e-05	0.000731305	0.900108	0.637594	0.821776	5.29663	0.0213667	0.130706	4.75029	0.0292933	0.162214	13.3146	0.000263341	0.00377357	ATP-binding cassette, sub-family C (CFTR/MRP), member 3 [Source:MGI Symbol;Acc:MGI:1923658]	11	94343295	94392997	-1	protein_coding	6	Abcc3	9022	11549	7364	6225	1.44932	1.85526	1.18297	1.86	1.23	1.18	0.78	ATP-binding cassette, sub-family C (CFTR/MRP), member 3	7.3e-04 ( 3.8e-05)	9.3e-01 (5.1e-01)	8.2e-01 (6.4e-01)	9.3e-01 (5.1e-01)
ENSMUSG00000031980	2.79487	0.0945667	0.674988	20.3728	3.76787e-05	0.000732275	20.1626	4.18551e-05	0.00206225	11.0606	0.000881811	0.0168646	10.9622	0.000929915	0.0186288	12.3348	0.000444584	0.00558934	angiotensinogen (serpin peptidase inhibitor, clade A, member 8) [Source:MGI Symbol;Acc:MGI:87963]	8	124556534	124569706	-1	protein_coding	1	Agt	22436	39490	20773	22125	1.01406	1.78486	0.938893	1.78	1.08	0.94	0.57	angiotensinogen (serpin peptidase inhibitor, clade A, member 8)	7.3e-04 ( 3.8e-05)	6.7e-01 (9.5e-02)	2.1e-03 (4.2e-05)	6.7e-01 (9.5e-02)
ENSMUSG00000022401	0.218667	0.640058	0.948095	20.3509	3.80942e-05	0.000739323	3.39373	0.183257	0.448817	8.37411	0.00380604	0.0445278	8.14652	0.00431439	0.0501133	22.4699	2.13459e-06	8.23144e-05	X-prolyl aminopeptidase 3, mitochondrial [Source:MGI Symbol;Acc:MGI:2445217]	15	81400138	81457482	1	protein_coding	7	Xpnpep3	414	352	490	509	0.81336	0.691552	0.962672	0.69	0.84	0.96	1.18	X-prolyl aminopeptidase 3, mitochondrial	7.4e-04 ( 3.8e-05)	9.5e-01 (6.4e-01)	4.5e-01 (1.8e-01)	9.5e-01 (6.4e-01)
ENSMUSG00000003814	6.90891	0.00857674	0.313769	20.3369	3.8361e-05	0.000743364	6.91131	0.0315665	0.168914	0.180027	0.67135	0.859401	0.178602	0.672577	0.859441	3.54319	0.0597902	0.196445	calreticulin [Source:MGI Symbol;Acc:MGI:88252]	8	84841850	84846934	-1	protein_coding	4	Calr	26457	20703	18731	19731	1.34088	1.04926	0.949318	1.05	1.41	0.95	1.28	calreticulin	7.4e-04 ( 3.8e-05)	3.1e-01 (8.6e-03)	1.7e-01 (3.2e-02)	3.1e-01 (8.6e-03)
ENSMUSG00000063954	0.0034769	0.95298	0.99389	20.3345	3.84086e-05	0.000743364	0.022091	0.989015	0.994668	3.13639	0.0765631	0.275349	2.70266	0.100181	0.333218	9.9281	0.00162775	0.0151481	histone cluster 2, H2aa2 [Source:MGI Symbol;Acc:MGI:2448283]	3	96239749	96240276	-1	protein_coding	1	Hist2h2aa2	529	485	1110	1142	0.463222	0.424694	0.971979	0.42	0.48	0.97	1.09	histone cluster 2, H2aa2	7.4e-04 ( 3.8e-05)	9.9e-01 (9.5e-01)	9.9e-01 (9.9e-01)	9.9e-01 (9.5e-01)
ENSMUSG00000062624	0.0490944	0.824647	0.979456	20.3188	3.87096e-05	0.000748155	4.30176	0.116381	0.353566	2.49634	0.114112	0.349492	2.57856	0.10832	0.347055	15.8181	6.97333e-05	0.00136769	cytochrome P450, family 2, subfamily c, polypeptide 67 [Source:MGI Symbol;Acc:MGI:3612288]	19	39608842	39649051	-1	protein_coding	1	Cyp2c67	4739	3002	6053	6165	0.768694	0.486942	0.981833	0.49	0.78	0.98	1.58	cytochrome P450, family 2, subfamily c, polypeptide 67	7.5e-04 ( 3.9e-05)	9.8e-01 (8.2e-01)	3.5e-01 (1.2e-01)	9.8e-01 (8.2e-01)
ENSMUSG00000024429	3.40361	0.065054	0.616946	20.2942	3.9189e-05	0.000755817	9.69748	0.00783823	0.0732091	0.54605	0.459936	0.723409	0.35832	0.549441	0.788556	4.12793	0.042181	0.156181	guanine nucleotide binding protein-like 1 [Source:MGI Symbol;Acc:MGI:95764]	17	35979851	35989462	1	protein_coding	2	Gnl1	537	738	771	908	0.59141	0.812775	0.849119	0.81	0.7	0.85	0.73	guanine nucleotide binding protein-like 1	7.6e-04 ( 3.9e-05)	6.2e-01 (6.5e-02)	7.3e-02 (7.8e-03)	6.2e-01 (6.5e-02)
ENSMUSG00000028601	5.37954	0.0203742	0.418904	20.2902	3.92681e-05	0.000755817	6.80321	0.0333197	0.174036	15.0739	0.000103382	0.0038579	12.0295	0.00052366	0.0128114	17.8654	2.3709e-05	0.000585143	enoyl Coenzyme A hydratase domain containing 2 [Source:MGI Symbol;Acc:MGI:1289238]	4	108165437	108179308	1	protein_coding	13	Echdc2	6216	4202	6216	7194	0.864053	0.584098	0.864053	0.58	1	0.86	1.48	enoyl Coenzyme A hydratase domain containing 2	7.6e-04 ( 3.9e-05)	4.2e-01 (2.0e-02)	1.7e-01 (3.3e-02)	4.2e-01 (2.0e-02)
ENSMUSG00000031379	1.25235	0.263103	0.844214	20.2914	3.92439e-05	0.000755817	1.28732	0.525366	0.750734	3.47247	0.062398	0.244166	2.87387	0.090028	0.314218	9.9895	0.00157436	0.0147884	pirin [Source:MGI Symbol;Acc:MGI:1916906]	X	164269371	164373011	1	protein_coding	5	Pir	733	884	635	498	1.47189	1.7751	1.2751	1.78	1.15	1.28	0.83	pirin	7.6e-04 ( 3.9e-05)	8.4e-01 (2.6e-01)	7.5e-01 (5.3e-01)	8.4e-01 (2.6e-01)
ENSMUSG00000022951	1.03559	0.308851	0.861937	20.2775	3.95191e-05	0.000759602	8.09086	0.0175022	0.120009	14.1888	0.000165353	0.0054212	12.8595	0.000335764	0.00952551	10.4807	0.00120627	0.0120527	regulator of calcineurin 1 [Source:MGI Symbol;Acc:MGI:1890564]	16	92391953	92470867	-1	protein_coding	7	Rcan1	745	985	493	557	1.33752	1.7684	0.885099	1.77	1.51	0.89	0.76	regulator of calcineurin 1	7.6e-04 ( 4.0e-05)	8.6e-01 (3.1e-01)	1.2e-01 (1.8e-02)	8.6e-01 (3.1e-01)
ENSMUSG00000021282	5.80957	0.0159392	0.389951	20.2714	3.96392e-05	0.000760136	11.8086	0.00272772	0.0366827	2.6348	0.104545	0.332468	1.9	0.168079	0.442672	4.18103	0.0408788	0.153124	eukaryotic translation initiation factor 5 [Source:MGI Symbol;Acc:MGI:95309]	12	111538016	111546752	1	protein_coding	17	Eif5	6531	6517	6289	4430	1.47427	1.47111	1.41964	1.47	1.04	1.42	1	eukaryotic translation initiation factor 5	7.6e-04 ( 4.0e-05)	3.9e-01 (1.6e-02)	3.7e-02 (2.7e-03)	3.9e-01 (1.6e-02)
ENSMUSG00000021957	0.380814	0.537168	0.932964	20.2706	3.96555e-05	0.000760136	1.63489	0.441559	0.694943	2.42353	0.119525	0.358803	2.00899	0.15637	0.425397	8.24832	0.00407897	0.0304035	transketolase [Source:MGI Symbol;Acc:MGI:105992]	14	30548359	30574720	1	protein_coding	9	Tkt	5078	4590	4298	3238	1.56825	1.41754	1.32736	1.42	1.18	1.33	1.11	transketolase	7.6e-04 ( 4.0e-05)	9.3e-01 (5.4e-01)	6.9e-01 (4.4e-01)	9.3e-01 (5.4e-01)
ENSMUSG00000059423	11.7461	0.000609712	0.0933258	20.2421	4.02247e-05	0.000769993	11.7561	0.00280024	0.0373178	0.0706146	0.790444	0.917029	0.0532002	0.817585	0.929261	1.8066	0.178916	0.395476	zinc finger protein 933 [Source:MGI Symbol;Acc:MGI:1922865]	4	147822986	147848366	-1	protein_coding	2	Zfp933	170	113	79	110	1.54545	1.02727	0.718182	1.03	2.15	0.72	1.5	zinc finger protein 933	7.7e-04 ( 4.0e-05)	9.3e-02 (6.1e-04)	3.7e-02 (2.8e-03)	9.3e-02 (6.1e-04)
ENSMUSG00000030556	1.84829	0.173983	0.776692	20.2257	4.05543e-05	0.00077524	4.12194	0.12733	0.370345	28.3631	1.00563e-07	1.92327e-05	27.4563	1.60687e-07	3.27033e-05	21.8073	3.0145e-06	0.000110241	leucine rich repeat containing 28 [Source:MGI Symbol;Acc:MGI:1915689]	7	67513410	67645268	-1	protein_coding	12	Lrrc28	640	898	640	565	1.13274	1.58938	1.13274	1.59	1	1.13	0.71	leucine rich repeat containing 28	7.8e-04 ( 4.1e-05)	7.8e-01 (1.7e-01)	3.7e-01 (1.3e-01)	7.8e-01 (1.7e-01)
ENSMUSG00000040026	7.27131	0.00700648	0.288037	20.2197	4.06774e-05	0.00077576	7.38331	0.0249307	0.14822	7.96463	0.00477003	0.0514199	7.08643	0.00776698	0.073947	9.61091	0.00193425	0.0172103	serum amyloid A 3 [Source:MGI Symbol;Acc:MGI:98223]	7	46711998	46715700	-1	protein_coding	3	Saa3	157	321	186	111	1.41441	2.89189	1.67568	2.89	0.84	1.68	0.49	serum amyloid A 3	7.8e-04 ( 4.1e-05)	2.9e-01 (7.0e-03)	1.5e-01 (2.5e-02)	2.9e-01 (7.0e-03)
ENSMUSG00000029269	2.16301	0.141367	0.759065	20.215	4.07731e-05	0.000776243	8.54971	0.0139141	0.105129	19.8167	8.52359e-06	0.000633075	34.7156	3.81571e-09	1.43273e-06	42.9631	5.57809e-11	1.0307e-08	sulfotransferase family 1B, member 1 [Source:MGI Symbol;Acc:MGI:2136282]	5	87513339	87538195	-1	protein_coding	3	Sult1b1	665	269	731	1107	0.600723	0.242999	0.660343	0.24	0.91	0.66	2.47	sulfotransferase family 1B, member 1	7.8e-04 ( 4.1e-05)	7.6e-01 (1.4e-01)	1.1e-01 (1.4e-02)	7.6e-01 (1.4e-01)
ENSMUSG00000042524	6.45367	0.0110724	0.344032	20.1732	4.16328e-05	0.000790458	11.2483	0.00360968	0.0445416	0.386894	0.533937	0.778162	0.341256	0.559105	0.794084	3.2975	0.0693852	0.215857	Sad1 and UNC84 domain containing 2 [Source:MGI Symbol;Acc:MGI:2443011]	15	79724070	79742536	-1	protein_coding	10	Sun2	1531	2183	2183	2412	0.634743	0.905058	0.905058	0.91	0.7	0.91	0.7	Sad1 and UNC84 domain containing 2	7.9e-04 ( 4.2e-05)	3.4e-01 (1.1e-02)	4.5e-02 (3.6e-03)	3.4e-01 (1.1e-02)
ENSMUSG00000040483	0.0522749	0.819151	0.979456	20.1603	4.19039e-05	0.000794527	1.10186	0.576414	0.783692	9.07889	0.00258576	0.0340967	9.70711	0.00183557	0.0292919	31.5807	1.91317e-08	1.55299e-06	XIAP associated factor 1 [Source:MGI Symbol;Acc:MGI:3772572]	11	72301629	72313733	1	protein_coding	5	Xaf1	74	58	125	120	0.616667	0.483333	1.04167	0.48	0.59	1.04	1.28	XIAP associated factor 1	7.9e-04 ( 4.2e-05)	9.8e-01 (8.2e-01)	7.8e-01 (5.8e-01)	9.8e-01 (8.2e-01)
ENSMUSG00000001418	0.631529	0.426795	0.905798	20.1391	4.23505e-05	0.000800851	10.5174	0.00520208	0.0563551	13.277	0.000268681	0.00747422	13.048	0.00030361	0.00897207	21.393	3.74129e-06	0.000132674	glycosylated lysosomal membrane protein [Source:MGI Symbol;Acc:MGI:1913318]	3	88325023	88331313	1	protein_coding	10	Glmp	1661	2168	1442	1584	1.04861	1.36869	0.910354	1.37	1.15	0.91	0.77	glycosylated lysosomal membrane protein	8.0e-04 ( 4.2e-05)	9.1e-01 (4.3e-01)	5.6e-02 (5.2e-03)	9.1e-01 (4.3e-01)
ENSMUSG00000072115	0.557817	0.455141	0.910523	20.139	4.23519e-05	0.000800851	4.55561	0.102509	0.331058	2.71909	0.0991543	0.322152	2.81532	0.0933683	0.320721	8.5274	0.0034984	0.0270827	angiogenin, ribonuclease, RNase A family, 5 [Source:MGI Symbol;Acc:MGI:88022]	14	51091150	51102009	1	protein_coding	2	Ang	3795	4613	5077	6367	0.596042	0.724517	0.797393	0.72	0.75	0.8	0.82	angiogenin, ribonuclease, RNase A family, 5	8.0e-04 ( 4.2e-05)	9.1e-01 (4.6e-01)	3.3e-01 (1.0e-01)	9.1e-01 (4.6e-01)
ENSMUSG00000043391	0.00997753	0.920434	0.98982	20.1319	4.25029e-05	0.000802622	1.4186	0.491989	0.729976	8.43176	0.00368724	0.0436197	7.58537	0.00588439	0.0616215	27.3711	1.67919e-07	9.70406e-06	RIKEN cDNA 2510009E07 gene [Source:MGI Symbol;Acc:MGI:1919440]	16	21649045	21694665	-1	protein_coding	4	2510009E07Rik	223	236	136	133	1.67669	1.77444	1.02256	1.77	1.64	1.02	0.94	RIKEN cDNA 2510009E07 gene	8.0e-04 ( 4.3e-05)	9.9e-01 (9.2e-01)	7.3e-01 (4.9e-01)	9.9e-01 (9.2e-01)
ENSMUSG00000020483	4.73492	0.0295562	0.489189	20.1286	4.25732e-05	0.000802866	4.7366	0.0936398	0.314998	6.63417	0.0100041	0.0824392	5.64411	0.0175141	0.121167	9.99817	0.00156696	0.0147441	dynein light chain LC8-type 2 [Source:MGI Symbol;Acc:MGI:1915347]	11	87979525	87987533	-1	protein_coding	4	Dynll2	2808	3004	2672	2307	1.21717	1.30212	1.15821	1.3	1.05	1.16	0.93	dynein light chain LC8-type 2	8.0e-04 ( 4.3e-05)	4.9e-01 (3.0e-02)	3.1e-01 (9.4e-02)	4.9e-01 (3.0e-02)
ENSMUSG00000063524	1.73677	0.187548	0.787096	20.1227	4.26979e-05	0.000804135	1.75248	0.416346	0.676804	2.52087	0.112348	0.346441	2.48574	0.114883	0.358033	8.46429	0.00362186	0.0277859	enolase 1, alpha non-neuron [Source:MGI Symbol;Acc:MGI:95393]	4	150236721	150248879	1	protein_coding	11	Eno1	17835	17015	13216	13485	1.32258	1.26177	0.980052	1.26	1.35	0.98	1.05	enolase 1, alpha non-neuron	8.0e-04 ( 4.3e-05)	7.9e-01 (1.9e-01)	6.8e-01 (4.2e-01)	7.9e-01 (1.9e-01)
ENSMUSG00000037851	0.66767	0.413865	0.902469	20.1053	4.30705e-05	0.000810061	0.73436	0.692685	0.851386	6.80565	0.00908696	0.0777189	6.84961	0.00886605	0.0810586	14.4139	0.000146716	0.0024266	isoleucine-tRNA synthetase [Source:MGI Symbol;Acc:MGI:2145219]	13	49682100	49734267	1	protein_coding	9	Iars	1081	1100	851	732	1.47678	1.50273	1.16257	1.5	1.27	1.16	0.98	isoleucine-tRNA synthetase	8.1e-04 ( 4.3e-05)	9.0e-01 (4.1e-01)	8.5e-01 (6.9e-01)	9.0e-01 (4.1e-01)
ENSMUSG00000038859	9.41133	0.00215649	0.163628	20.087	4.3467e-05	0.000816421	23.1995	9.1685e-06	0.000644698	46.9392	7.32233e-12	5.04143e-09	48.6474	3.06375e-12	2.86828e-09	19.5985	9.55459e-06	0.000283668	BAI1-associated protein 2-like 1 [Source:MGI Symbol;Acc:MGI:1914148]	5	144264526	144358112	-1	protein_coding	2	Baiap2l1	1534	2413	1547	1622	0.945746	1.48767	0.953761	1.49	0.99	0.95	0.64	BAI1-associated protein 2-like 1	8.2e-04 ( 4.3e-05)	1.6e-01 (2.2e-03)	6.4e-04 (9.2e-06)	1.6e-01 (2.2e-03)
ENSMUSG00000069135	2.34403	0.125764	0.736013	20.0623	4.40073e-05	0.000825461	5.09601	0.0782375	0.285992	3.6012	0.057738	0.23377	3.38917	0.0656259	0.260261	10.9225	0.000950011	0.0100839	Fgfr1 oncogene partner [Source:MGI Symbol;Acc:MGI:1922546]	17	8165501	8196804	1	protein_coding	4	Fgfr1op	275	269	379	320	0.859375	0.840625	1.18437	0.84	0.73	1.18	1.02	Fgfr1 oncogene partner	8.3e-04 ( 4.4e-05)	7.4e-01 (1.3e-01)	2.9e-01 (7.8e-02)	7.4e-01 (1.3e-01)
ENSMUSG00000060579	1.94323	0.163318	0.769852	20.0561	4.41432e-05	0.000826902	2.99668	0.223501	0.494319	8.98583	0.00272081	0.0354117	6.45693	0.0110521	0.0918722	10.034	0.00153677	0.014545	fragile histidine triad gene [Source:MGI Symbol;Acc:MGI:1277947]	14	9550092	11162035	-1	protein_coding	8	Fhit	56	47	74	120	0.466667	0.391667	0.616667	0.39	0.76	0.62	1.19	fragile histidine triad gene	8.3e-04 ( 4.4e-05)	7.7e-01 (1.6e-01)	4.9e-01 (2.2e-01)	7.7e-01 (1.6e-01)
ENSMUSG00000053175	4.21035	0.040178	0.536612	20.027	4.47916e-05	0.000836615	11.3437	0.00344153	0.0431143	40.0802	2.43746e-10	1.11879e-07	20.7274	5.29519e-06	0.000472973	18.9353	1.35226e-05	0.000376034	B cell leukemia/lymphoma 3 [Source:MGI Symbol;Acc:MGI:88140]	7	19808462	19822770	-1	protein_coding	6	Bcl3	702	1998	697	610	1.15082	3.27541	1.14262	3.28	1.01	1.14	0.35	B cell leukemia/lymphoma 3	8.4e-04 ( 4.5e-05)	5.4e-01 (4.0e-02)	4.3e-02 (3.4e-03)	5.4e-01 (4.0e-02)
ENSMUSG00000109865	5.72664	0.0167094	0.398117	20.0248	4.48411e-05	0.000836615	8.71708	0.012797	0.0994569	13.9088	0.000191898	0.00599193	11.9492	0.000546718	0.013102	19.4098	1.05466e-05	0.000304744	heat shock protein 14 [Source:MGI Symbol;Acc:MGI:1354164]	2	3488850	3512814	-1	protein_coding	6	Hspa14	261	198	313	354	0.737288	0.559322	0.884181	0.56	0.83	0.88	1.32	heat shock protein 14	8.4e-04 ( 4.5e-05)	4.0e-01 (1.7e-02)	9.9e-02 (1.3e-02)	4.0e-01 (1.7e-02)
ENSMUSG00000028007	0.315532	0.574305	0.936873	20.029	4.47472e-05	0.000836615	0.764725	0.682248	0.845386	3.6792	0.0550953	0.228338	3.36279	0.0666849	0.262902	9.64867	0.00189489	0.0170032	sorting nexin 7 [Source:MGI Symbol;Acc:MGI:1923811]	3	117781647	117868936	-1	protein_coding	5	Snx7	704	627	564	422	1.66825	1.48578	1.33649	1.49	1.25	1.34	1.12	sorting nexin 7	8.4e-04 ( 4.5e-05)	9.4e-01 (5.7e-01)	8.5e-01 (6.8e-01)	9.4e-01 (5.7e-01)
ENSMUSG00000032673	0.44567	0.504399	0.924817	20.0029	4.5335e-05	0.000844703	5.5446	0.062518	0.250376	15.5068	8.22101e-05	0.00329079	14.4426	0.000144497	0.00539673	35.8411	2.14083e-09	2.27755e-07	prolyl-tRNA synthetase domain containing 1 [Source:MGI Symbol;Acc:MGI:1915189]	11	29511757	29515033	-1	protein_coding	2	Prorsd1	400	266	527	519	0.770713	0.512524	1.01541	0.51	0.76	1.02	1.5	prolyl-tRNA synthetase domain containing 1	8.4e-04 ( 4.5e-05)	9.2e-01 (5.0e-01)	2.5e-01 (6.3e-02)	9.2e-01 (5.0e-01)
ENSMUSG00000037795	2.27416	0.131546	0.744572	19.9372	4.68478e-05	0.000871731	2.30736	0.315473	0.595039	8.00568	0.00466309	0.0508736	6.86378	0.00879602	0.0804793	22.4968	2.10495e-06	8.18011e-05	NEDD4 binding protein 2 [Source:MGI Symbol;Acc:MGI:2684414]	5	65763521	65830108	1	protein_coding	9	N4bp2	348	303	367	476	0.731092	0.636555	0.771008	0.64	0.95	0.77	1.15	NEDD4 binding protein 2	8.7e-04 ( 4.7e-05)	7.4e-01 (1.3e-01)	6.0e-01 (3.2e-01)	7.4e-01 (1.3e-01)
ENSMUSG00000019189	5.00185	0.0253202	0.461724	19.9303	4.701e-05	0.000873588	5.4316	0.0661519	0.258349	0.788847	0.374449	0.660031	0.857582	0.354416	0.648731	3.47008	0.0624883	0.202002	ring finger protein 145 [Source:MGI Symbol;Acc:MGI:1921565]	11	44518964	44565520	1	protein_coding	6	Rnf145	255	375	408	444	0.574324	0.844595	0.918919	0.84	0.62	0.92	0.68	ring finger protein 145	8.7e-04 ( 4.7e-05)	4.6e-01 (2.5e-02)	2.6e-01 (6.6e-02)	4.6e-01 (2.5e-02)
ENSMUSG00000034064	1.19655	0.274013	0.848369	19.925	4.71337e-05	0.000874724	1.82212	0.402097	0.665768	1.83807	0.175177	0.442036	1.66071	0.197508	0.477706	6.1147	0.0134062	0.0705372	protein O-glucosyltransferase 1 [Source:MGI Symbol;Acc:MGI:2444232]	16	38525137	38550258	-1	protein_coding	5	Poglut1	310	270	238	214	1.4486	1.26168	1.11215	1.26	1.3	1.11	1.15	protein O-glucosyltransferase 1	8.7e-04 ( 4.7e-05)	8.5e-01 (2.7e-01)	6.7e-01 (4.0e-01)	8.5e-01 (2.7e-01)
ENSMUSG00000038388	1.07195	0.300506	0.860128	19.9107	4.74727e-05	0.000879848	1.09333	0.578876	0.784441	12.2624	0.000462172	0.011037	11.4798	0.000703584	0.0156584	14.4948	0.000140549	0.00234967	membrane protein, palmitoylated 6 (MAGUK p55 subfamily member 6) [Source:MGI Symbol;Acc:MGI:1927340]	6	50110241	50198939	1	protein_coding	9	Mpp6	1758	1769	1562	1287	1.36597	1.37451	1.21368	1.37	1.13	1.21	0.99	membrane protein, palmitoylated 6 (MAGUK p55 subfamily member 6)	8.8e-04 ( 4.7e-05)	8.6e-01 (3.0e-01)	7.8e-01 (5.8e-01)	8.6e-01 (3.0e-01)
ENSMUSG00000047496	4.88753	0.0270514	0.470523	19.9069	4.75638e-05	0.000880371	5.62505	0.0600532	0.245053	4.92783	0.0264274	0.149203	4.15231	0.0415778	0.19951	11.7535	0.000607303	0.0071367	ring finger protein 152 [Source:MGI Symbol;Acc:MGI:2443787]	1	105276914	105356710	-1	protein_coding	2	Rnf152	195	74	218	248	0.78629	0.298387	0.879032	0.3	0.89	0.88	2.64	ring finger protein 152	8.8e-04 ( 4.8e-05)	4.7e-01 (2.7e-02)	2.5e-01 (6.0e-02)	4.7e-01 (2.7e-02)
ENSMUSG00000004105	2.81139	0.0935972	0.673544	19.8906	4.79521e-05	0.000886385	2.81342	0.244948	0.519957	5.24894	0.0219602	0.1323	4.75903	0.0291449	0.161957	7.9872	0.00471092	0.0334456	angiopoietin-like 2 [Source:MGI Symbol;Acc:MGI:1347002]	2	33216069	33247717	1	protein_coding	4	Angptl2	220	168	220	450	0.488889	0.373333	0.488889	0.37	1	0.49	1.31	angiopoietin-like 2	8.9e-04 ( 4.8e-05)	6.7e-01 (9.4e-02)	5.2e-01 (2.4e-01)	6.7e-01 (9.4e-02)
ENSMUSG00000060613	13.8286	0.000200267	0.047659	19.8583	4.87325e-05	0.000898437	13.987	0.000917816	0.0177167	0.0460926	0.830008	0.933303	0.138553	0.709724	0.87717	0.884608	0.346943	0.588633	cytochrome P450, family 2, subfamily c, polypeptide 70 [Source:MGI Symbol;Acc:MGI:2385878]	19	40153353	40187333	-1	protein_coding	4	Cyp2c70	6287	9059	9059	7236	0.86885	1.25193	1.25193	1.25	0.69	1.25	0.69	cytochrome P450, family 2, subfamily c, polypeptide 70	9.0e-04 ( 4.9e-05)	4.8e-02 (2.0e-04)	1.8e-02 (9.2e-04)	4.8e-02 (2.0e-04)
ENSMUSG00000032238	4.54101	0.033092	0.503908	19.8472	4.90039e-05	0.000901722	10.2359	0.00598817	0.0609473	41.5191	1.16727e-10	6.18203e-08	38.0872	6.76514e-10	3.23043e-07	24.624	6.96776e-07	3.30568e-05	RAR-related orphan receptor alpha [Source:MGI Symbol;Acc:MGI:104661]	9	68653786	69388246	1	protein_coding	6	Rora	1106	1447	1062	968	1.14256	1.49483	1.09711	1.49	1.04	1.1	0.76	RAR-related orphan receptor alpha	9.0e-04 ( 4.9e-05)	5.0e-01 (3.3e-02)	6.1e-02 (6.0e-03)	5.0e-01 (3.3e-02)
ENSMUSG00000051098	5.04918	0.0246376	0.460011	19.8435	4.90957e-05	0.000901722	7.23784	0.0268117	0.154661	18.8762	1.3948e-05	0.000923383	16.8159	4.11868e-05	0.00220758	19.9199	8.07539e-06	0.000252006	metallo-beta-lactamase domain containing 2 [Source:MGI Symbol;Acc:MGI:1920102]	13	81711341	81753275	1	protein_coding	2	Mblac2	154	103	160	215	0.716279	0.47907	0.744186	0.48	0.96	0.74	1.5	metallo-beta-lactamase domain containing 2	9.0e-04 ( 4.9e-05)	4.6e-01 (2.5e-02)	1.5e-01 (2.7e-02)	4.6e-01 (2.5e-02)
ENSMUSG00000050627	4.50843	0.0337283	0.507804	19.8431	4.9104e-05	0.000901722	5.32024	0.0699399	0.26725	2.19765	0.138222	0.392018	2.36375	0.124184	0.373795	7.56761	0.00594266	0.0395324	glycerol-3-phosphate dehydrogenase 1-like [Source:MGI Symbol;Acc:MGI:1289257]	9	114899341	114933987	-1	protein_coding	4	Gpd1l	764	835	909	1025	0.745366	0.814634	0.886829	0.81	0.84	0.89	0.91	glycerol-3-phosphate dehydrogenase 1-like	9.0e-04 ( 4.9e-05)	5.1e-01 (3.4e-02)	2.7e-01 (7.0e-02)	5.1e-01 (3.4e-02)
ENSMUSG00000050103	4.38269	0.0363056	0.522238	19.7402	5.16987e-05	0.000945648	7.2598	0.0265189	0.153841	3.67642	0.0551872	0.228347	2.81448	0.093417	0.320721	5.12217	0.023622	0.104152	alkylglycerol monooxygenase [Source:MGI Symbol;Acc:MGI:2442495]	12	37241641	37582202	1	protein_coding	6	Agmo	1943	1970	1773	1371	1.41721	1.43691	1.29322	1.44	1.1	1.29	0.99	alkylglycerol monooxygenase	9.5e-04 ( 5.2e-05)	5.2e-01 (3.6e-02)	1.5e-01 (2.7e-02)	5.2e-01 (3.6e-02)
ENSMUSG00000032310	2.40223	0.121162	0.728197	19.7195	5.22353e-05	0.00095297	8.74595	0.0126137	0.0983303	8.97632	0.00273501	0.0354624	7.3447	0.00672609	0.0677745	15.4611	8.42199e-05	0.00160041	cytochrome P450, family 1, subfamily a, polypeptide 2 [Source:MGI Symbol;Acc:MGI:88589]	9	57676937	57683703	-1	protein_coding	2	Cyp1a2	23016	43472	19225	20804	1.10633	2.0896	0.924101	2.09	1.2	0.92	0.53	cytochrome P450, family 1, subfamily a, polypeptide 2	9.5e-04 ( 5.2e-05)	7.3e-01 (1.2e-01)	9.8e-02 (1.3e-02)	7.3e-01 (1.2e-01)
ENSMUSG00000022787	0.482227	0.487415	0.91938	19.7205	5.2208e-05	0.00095297	1.38314	0.500789	0.735052	1.35103	0.245098	0.528228	1.13455	0.286807	0.582786	6.62498	0.0100559	0.0577832	WD repeat domain 53 [Source:MGI Symbol;Acc:MGI:1916230]	16	32247227	32257083	1	protein_coding	4	Wdr53	168	175	248	269	0.624535	0.650558	0.921933	0.65	0.68	0.92	0.96	WD repeat domain 53	9.5e-04 ( 5.2e-05)	9.2e-01 (4.9e-01)	7.4e-01 (5.0e-01)	9.2e-01 (4.9e-01)
ENSMUSG00000062382	1.85286	0.173451	0.776692	19.6936	5.2915e-05	0.000964113	7.20322	0.0272798	0.156189	10.0309	0.00153932	0.0243357	11.4104	0.000730351	0.0160995	18.7743	1.47136e-05	0.000403562	ferritin light polypeptide 1, pseudogene 1 [Source:MGI Symbol;Acc:MGI:3779109]	13	74399694	74407346	1	protein_coding	2	Ftl1-ps1	6333	8059	5087	4738	1.33664	1.70093	1.07366	1.7	1.24	1.07	0.79	ferritin light polypeptide 1, pseudogene 1	9.6e-04 ( 5.3e-05)	7.8e-01 (1.7e-01)	1.6e-01 (2.7e-02)	7.8e-01 (1.7e-01)
ENSMUSG00000034620	3.04954	0.0807598	0.645556	19.6447	5.42272e-05	0.000986738	13.5166	0.00116118	0.0206986	2.50698	0.113343	0.348145	2.8475	0.0915162	0.316824	6.09203	0.0135793	0.0711809	transmembrane protein 5 [Source:MGI Symbol;Acc:MGI:2384919]	10	122078114	122097371	-1	protein_coding	6	Tmem5	499	401	725	562	0.8879	0.713523	1.29004	0.71	0.69	1.29	1.24	transmembrane protein 5	9.9e-04 ( 5.4e-05)	6.5e-01 (8.1e-02)	2.1e-02 (1.2e-03)	6.5e-01 (8.1e-02)
ENSMUSG00000074264	0.178826	0.672384	0.953405	19.6022	5.53918e-05	0.00100662	0.618429	0.734023	0.874513	5.78059	0.0162041	0.11101	5.50815	0.0189281	0.126454	23.4007	1.3153e-06	5.48094e-05	amylase 1, salivary [Source:MGI Symbol;Acc:MGI:88019]	3	113555710	113606699	-1	protein_coding	5	Amy1	4481	4497	5541	6294	0.711948	0.71449	0.880362	0.71	0.81	0.88	1	amylase 1, salivary	1.0e-03 ( 5.5e-05)	9.5e-01 (6.7e-01)	8.7e-01 (7.3e-01)	9.5e-01 (6.7e-01)
ENSMUSG00000040761	0.413214	0.520343	0.9286	19.5987	5.54884e-05	0.00100707	30.9661	1.88711e-07	2.967e-05	11.3975	0.000735437	0.0149365	11.2694	0.000787952	0.0168567	13.4664	0.000242868	0.00354163	spen family transcription repressor [Source:MGI Symbol;Acc:MGI:1891706]	4	141467890	141538597	-1	protein_coding	6	Spen	338	875	296	513	0.658869	1.70565	0.576998	1.71	1.14	0.58	0.39	spen family transcription repressor	1.0e-03 ( 5.5e-05)	9.3e-01 (5.2e-01)	3.0e-05 (1.9e-07)	9.3e-01 (5.2e-01)
ENSMUSG00000026064	6.4069	0.0113678	0.350094	19.573	5.62062e-05	0.00101877	36.4065	1.24287e-08	3.5493e-06	21.7383	3.12484e-06	0.000284961	19.72	8.96598e-06	0.000691809	12.471	0.000413325	0.00531045	protein tyrosine phosphatase 4a1 [Source:MGI Symbol;Acc:MGI:1277096]	1	30940302	30949770	-1	protein_coding	6	Ptp4a1	5040	12149	5141	7393	0.681726	1.64331	0.695388	1.64	0.98	0.7	0.41	protein tyrosine phosphatase 4a1	1.0e-03 ( 5.6e-05)	3.5e-01 (1.1e-02)	3.5e-06 (1.2e-08)	3.5e-01 (1.1e-02)
ENSMUSG00000022620	0.405224	0.524403	0.929376	19.545	5.69982e-05	0.00103179	6.48118	0.0391408	0.191545	15.8899	6.7136e-05	0.00288895	14.9719	0.000109126	0.00450724	16.3441	5.28214e-05	0.00111713	arylsulfatase A [Source:MGI Symbol;Acc:MGI:88077]	15	89472476	89477425	-1	protein_coding	4	Arsa	1517	1961	1254	1291	1.17506	1.51898	0.97134	1.52	1.21	0.97	0.77	arylsulfatase A	1.0e-03 ( 5.7e-05)	9.3e-01 (5.2e-01)	1.9e-01 (3.9e-02)	9.3e-01 (5.2e-01)
ENSMUSG00000023961	0.117808	0.731424	0.964577	19.5326	5.73519e-05	0.00103685	7.54001	0.023052	0.141123	9.32649	0.00225865	0.0313841	9.7159	0.00182681	0.0292185	16.6395	4.51989e-05	0.000987135	ectonucleotide pyrophosphatase/phosphodiesterase 4 [Source:MGI Symbol;Acc:MGI:2682634]	17	44096308	44105809	-1	protein_coding	2	Enpp4	173	123	214	204	0.848039	0.602941	1.04902	0.6	0.81	1.05	1.41	ectonucleotide pyrophosphatase/phosphodiesterase 4	1.0e-03 ( 5.7e-05)	9.6e-01 (7.3e-01)	1.4e-01 (2.3e-02)	9.6e-01 (7.3e-01)
ENSMUSG00000046805	1.22095	0.269175	0.845009	19.5206	5.76977e-05	0.00104176	1.81687	0.403154	0.666903	3.30421	0.0691027	0.259418	3.07146	0.0796779	0.291157	8.13586	0.00433983	0.0317253	macrophage expressed gene 1 [Source:MGI Symbol;Acc:MGI:1333743]	19	12460779	12465284	1	protein_coding	1	Mpeg1	575	634	645	993	0.579053	0.638469	0.649547	0.64	0.89	0.65	0.91	macrophage expressed gene 1	1.0e-03 ( 5.8e-05)	8.5e-01 (2.7e-01)	6.7e-01 (4.0e-01)	8.5e-01 (2.7e-01)
ENSMUSG00000028961	0.561545	0.453638	0.910523	19.5147	5.78668e-05	0.00104347	2.9953	0.223655	0.494342	0.27585	0.599434	0.817077	0.114671	0.734888	0.889045	6.29687	0.0120951	0.0660131	phosphogluconate dehydrogenase [Source:MGI Symbol;Acc:MGI:97553]	4	149149991	149166771	-1	protein_coding	5	Pgd	1282	1055	782	673	1.9049	1.56761	1.16196	1.57	1.64	1.16	1.22	phosphogluconate dehydrogenase	1.0e-03 ( 5.8e-05)	9.1e-01 (4.5e-01)	4.9e-01 (2.2e-01)	9.1e-01 (4.5e-01)
ENSMUSG00000034201	0.846816	0.357455	0.882686	19.5072	5.80837e-05	0.00104603	8.47612	0.0144356	0.106933	16.326	5.33275e-05	0.00245099	18.576	1.63263e-05	0.00108268	27.6591	1.44691e-07	8.50163e-06	growth arrest-specific 2 like 1 [Source:MGI Symbol;Acc:MGI:1926176]	11	5054132	5065327	-1	protein_coding	7	Gas2l1	437	713	410	383	1.14099	1.86162	1.0705	1.86	1.07	1.07	0.61	growth arrest-specific 2 like 1	1.0e-03 ( 5.8e-05)	8.8e-01 (3.6e-01)	1.1e-01 (1.4e-02)	8.8e-01 (3.6e-01)
ENSMUSG00000025813	0.0919933	0.761658	0.969922	19.5022	5.82304e-05	0.00104732	7.1377	0.0281883	0.159282	10.3441	0.0012989	0.0217589	11.9593	0.000543765	0.0130979	17.459	2.93572e-05	0.000701801	homer scaffolding protein 2 [Source:MGI Symbol;Acc:MGI:1347354]	7	81600481	81707527	-1	protein_coding	9	Homer2	603	482	604	755	0.798675	0.638411	0.8	0.64	1	0.8	1.25	homer scaffolding protein 2	1.0e-03 ( 5.8e-05)	9.7e-01 (7.6e-01)	1.6e-01 (2.8e-02)	9.7e-01 (7.6e-01)
ENSMUSG00000022404	0.298251	0.584981	0.94126	19.4861	5.87021e-05	0.00105445	7.65839	0.0217271	0.136373	0.522119	0.469939	0.730039	0.235601	0.627402	0.833864	3.55276	0.0594464	0.195734	solute carrier family 25 (mitochondrial carrier, peroxisomal membrane protein), member 17 [Source:MGI Symbol;Acc:MGI:1342248]	15	81318911	81360812	-1	protein_coding	7	Slc25a17	1397	1164	1051	812	1.72044	1.4335	1.29433	1.43	1.33	1.29	1.2	solute carrier family 25 (mitochondrial carrier, peroxisomal membrane protein), member 17	1.1e-03 ( 5.9e-05)	9.4e-01 (5.8e-01)	1.4e-01 (2.2e-02)	9.4e-01 (5.8e-01)
ENSMUSG00000043013	3.3533	0.0670703	0.618258	19.4833	5.87829e-05	0.00105455	3.45766	0.177492	0.44065	9.61178	0.00193333	0.0285338	7.53558	0.00604924	0.062786	27.7262	1.39755e-07	8.2809e-06	one cut domain, family member 1 [Source:MGI Symbol;Acc:MGI:1196423]	9	74861921	74891781	1	protein_coding	2	Onecut1	103	79	128	546	0.188645	0.144689	0.234432	0.14	0.8	0.23	1.3	one cut domain, family member 1	1.1e-03 ( 5.9e-05)	6.2e-01 (6.7e-02)	4.4e-01 (1.8e-01)	6.2e-01 (6.7e-02)
ENSMUSG00000045962	1.47322	0.224838	0.819332	19.446	5.98894e-05	0.00107302	1.50087	0.472161	0.715881	8.25787	0.00405758	0.0463233	6.53861	0.0105558	0.0893085	18.4356	1.75741e-05	0.000461558	WNK lysine deficient protein kinase 1 [Source:MGI Symbol;Acc:MGI:2442092]	6	119923969	120038672	-1	protein_coding	26	Wnk1	1403	1557	1216	1145	1.22533	1.35983	1.06201	1.36	1.15	1.06	0.9	WNK lysine deficient protein kinase 1	1.1e-03 ( 6.0e-05)	8.2e-01 (2.2e-01)	7.2e-01 (4.7e-01)	8.2e-01 (2.2e-01)
ENSMUSG00000009772	0.0201077	0.887237	0.986625	19.4363	6.01808e-05	0.00107687	2.08709	0.352204	0.627162	2.46369	0.116504	0.353441	1.88249	0.170051	0.445693	8.72598	0.00313708	0.0250877	NUAK family, SNF1-like kinase, 2 [Source:MGI Symbol;Acc:MGI:1921387]	1	132316126	132333488	1	protein_coding	4	Nuak2	178	213	251	335	0.531343	0.635821	0.749254	0.64	0.71	0.75	0.84	NUAK family, SNF1-like kinase, 2	1.1e-03 ( 6.0e-05)	9.9e-01 (8.9e-01)	6.3e-01 (3.5e-01)	9.9e-01 (8.9e-01)
ENSMUSG00000020718	1.46651	0.225897	0.820169	19.3947	6.14461e-05	0.0010967	1.69432	0.42863	0.685707	7.66335	0.00563537	0.0570546	5.33026	0.0209582	0.133744	13.5403	0.000233492	0.00344426	polymerase (DNA directed), gamma 2, accessory subunit [Source:MGI Symbol;Acc:MGI:1354947]	11	106768253	106779537	-1	protein_coding	6	Polg2	139	118	182	235	0.591489	0.502128	0.774468	0.5	0.76	0.77	1.18	polymerase (DNA directed), gamma 2, accessory subunit	1.1e-03 ( 6.1e-05)	8.2e-01 (2.3e-01)	6.9e-01 (4.3e-01)	8.2e-01 (2.3e-01)
ENSMUSG00000051934	2.14732	0.142819	0.7609	19.3806	6.18821e-05	0.00110308	2.36421	0.306633	0.584805	3.53974	0.0599149	0.238744	4.20683	0.0402615	0.196738	17.3628	3.08807e-05	0.000723969	spermatogenesis associated, serine-rich 2 [Source:MGI Symbol;Acc:MGI:1919822]	15	99125916	99213215	1	protein_coding	7	Spats2	210	213	131	149	1.4094	1.42953	0.879195	1.43	1.6	0.88	0.99	spermatogenesis associated, serine-rich 2	1.1e-03 ( 6.2e-05)	7.6e-01 (1.4e-01)	5.8e-01 (3.1e-01)	7.6e-01 (1.4e-01)
ENSMUSG00000063406	0.345925	0.556429	0.936414	19.3488	6.28731e-05	0.00111475	0.664973	0.717138	0.865676	5.85401	0.0155416	0.108056	4.9981	0.0253751	0.149787	11.4829	0.000702382	0.00794807	transmembrane p24 trafficking protein 5 [Source:MGI Symbol;Acc:MGI:1921586]	5	108106366	108132620	-1	protein_coding	6	Tmed5	2125	2144	2684	2818	0.754081	0.760823	0.952449	0.76	0.79	0.95	0.99	transmembrane p24 trafficking protein 5	1.1e-03 ( 6.3e-05)	9.4e-01 (5.6e-01)	8.7e-01 (7.2e-01)	9.4e-01 (5.6e-01)
ENSMUSG00000030731	4.64733	0.031102	0.493438	19.3007	6.44034e-05	0.00113931	19.5649	5.64337e-05	0.00259762	3.95938	0.0466107	0.208033	4.61013	0.0317836	0.170683	6.04431	0.0139512	0.0724007	synaptotagmin III [Source:MGI Symbol;Acc:MGI:99665]	7	44384102	44400187	1	protein_coding	6	Syt3	144	196	102	155	0.929032	1.26452	0.658065	1.26	1.41	0.66	0.73	synaptotagmin III	1.1e-03 ( 6.4e-05)	4.9e-01 (3.1e-02)	2.6e-03 (5.6e-05)	4.9e-01 (3.1e-02)
ENSMUSG00000049086	10.8108	0.00100909	0.113614	19.2915	6.47015e-05	0.00114314	10.8988	0.00429899	0.0495517	18.2059	1.98262e-05	0.00122976	14.6154	0.000131833	0.00501715	13.9032	0.000192473	0.00298663	brain expressed myelocytomatosis oncogene [Source:MGI Symbol;Acc:MGI:88184]	2	25706739	25707721	1	protein_coding	1	Bmyc	177	114	158	235	0.753191	0.485106	0.67234	0.49	1.12	0.67	1.55	brain expressed myelocytomatosis oncogene	1.1e-03 ( 6.5e-05)	1.1e-01 (1.0e-03)	5.0e-02 (4.3e-03)	1.1e-01 (1.0e-03)
ENSMUSG00000078612	0.0901915	0.763934	0.970625	19.2854	6.48985e-05	0.00114518	0.208918	0.900812	0.955361	5.13002	0.0235155	0.138235	4.41689	0.0355849	0.182299	12.6298	0.000379651	0.00495486	FYN binding protein 2 [Source:MGI Symbol;Acc:MGI:2685466]	4	104913456	105016863	1	protein_coding	2	Fyb2	140	149	107	91	1.53846	1.63736	1.17582	1.64	1.31	1.18	0.94	FYN binding protein 2	1.1e-03 ( 6.5e-05)	9.7e-01 (7.6e-01)	9.6e-01 (9.0e-01)	9.7e-01 (7.6e-01)
ENSMUSG00000023393	3.66562	0.055546	0.58988	19.2549	6.58959e-05	0.00116131	3.7019	0.157088	0.413325	0.908127	0.340612	0.627875	0.754507	0.385053	0.672801	7.98905	0.00470612	0.0334453	solute carrier family 17, member 9 [Source:MGI Symbol;Acc:MGI:1919107]	2	180725263	180742280	1	protein_coding	5	Slc17a9	145	121	88	95	1.52632	1.27368	0.926316	1.27	1.65	0.93	1.2	solute carrier family 17, member 9	1.2e-03 ( 6.6e-05)	5.9e-01 (5.6e-02)	4.1e-01 (1.6e-01)	5.9e-01 (5.6e-02)
ENSMUSG00000031844	10.1166	0.00146937	0.133987	19.2453	6.62105e-05	0.00116257	12.6397	0.00180023	0.027835	0.191927	0.661317	0.853239	0.18089	0.67061	0.858701	0.873635	0.349951	0.591677	hydroxysteroid (17-beta) dehydrogenase 2 [Source:MGI Symbol;Acc:MGI:1096386]	8	117701904	117759027	1	protein_coding	3	Hsd17b2	4643	3397	3397	3539	1.31195	0.959876	0.959876	0.96	1.37	0.96	1.37	hydroxysteroid (17-beta) dehydrogenase 2	1.2e-03 ( 6.6e-05)	1.3e-01 (1.5e-03)	2.8e-02 (1.8e-03)	1.3e-01 (1.5e-03)
ENSMUSG00000037876	0.00756205	0.930703	0.99152	19.2468	6.61638e-05	0.00116257	8.3909	0.015064	0.109558	9.8586	0.00169039	0.0258918	9.39385	0.00217714	0.0325597	13.8408	0.000198971	0.00305706	jumonji domain containing 1C [Source:MGI Symbol;Acc:MGI:1918614]	10	67096125	67256326	1	protein_coding	12	Jmjd1c	584	692	453	490	1.19184	1.41224	0.92449	1.41	1.29	0.92	0.84	jumonji domain containing 1C	1.2e-03 ( 6.6e-05)	9.9e-01 (9.3e-01)	1.1e-01 (1.5e-02)	9.9e-01 (9.3e-01)
ENSMUSG00000020538	3.71105	0.0540534	0.58713	19.2452	6.62165e-05	0.00116257	8.07061	0.0176803	0.120628	21.4298	3.67031e-06	0.000326065	24.1008	9.14201e-07	0.000131001	26.0412	3.3421e-07	1.79134e-05	sterol regulatory element binding transcription factor 1 [Source:MGI Symbol;Acc:MGI:107606]	11	60199089	60222581	-1	protein_coding	12	Srebf1	1961	1293	2127	3073	0.638139	0.420761	0.692158	0.42	0.92	0.69	1.52	sterol regulatory element binding transcription factor 1	1.2e-03 ( 6.6e-05)	5.9e-01 (5.4e-02)	1.2e-01 (1.8e-02)	5.9e-01 (5.4e-02)
ENSMUSG00000055401	1.1191	0.290111	0.854293	19.2262	6.68466e-05	0.00117216	3.48019	0.175503	0.438696	1.03779	0.308336	0.597409	0.841931	0.358845	0.652073	6.59608	0.0102203	0.0584382	F-box protein 6 [Source:MGI Symbol;Acc:MGI:1354743]	4	148145716	148152140	-1	protein_coding	8	Fbxo6	1189	1029	958	902	1.31818	1.1408	1.06208	1.14	1.24	1.06	1.16	F-box protein 6	1.2e-03 ( 6.7e-05)	8.5e-01 (2.9e-01)	4.4e-01 (1.8e-01)	8.5e-01 (2.9e-01)
ENSMUSG00000029458	5.84964	0.0155803	0.389231	19.2038	6.75988e-05	0.00118387	11.6527	0.0029488	0.0387806	5.78577e-08	0.999808	0.999893	0.0275494	0.868173	0.948809	1.4669	0.225835	0.455174	BRCA1 associated protein [Source:MGI Symbol;Acc:MGI:1919649]	5	121660563	121687256	1	protein_coding	9	Brap	3581	5271	5214	5319	0.673247	0.990976	0.980259	0.99	0.69	0.98	0.68	BRCA1 associated protein	1.2e-03 ( 6.8e-05)	3.9e-01 (1.6e-02)	3.9e-02 (2.9e-03)	3.9e-01 (1.6e-02)
ENSMUSG00000021311	0.00493421	0.944	0.993666	19.1941	6.79285e-05	0.00118815	0.641503	0.725604	0.8704	7.14001	0.00753826	0.0698532	7.13981	0.0075391	0.0725645	14.0031	0.00018251	0.0028733	5-methyltetrahydrofolate-homocysteine methyltransferase [Source:MGI Symbol;Acc:MGI:894292]	13	12182712	12258113	-1	protein_coding	4	Mtr	139	125	185	198	0.70202	0.631313	0.934343	0.63	0.75	0.93	1.11	5-methyltetrahydrofolate-homocysteine methyltransferase	1.2e-03 ( 6.8e-05)	9.9e-01 (9.4e-01)	8.7e-01 (7.3e-01)	9.9e-01 (9.4e-01)
ENSMUSG00000022521	2.43039	0.119003	0.723729	19.1843	6.8261e-05	0.00119248	2.80412	0.246089	0.520728	9.57182	0.00197587	0.0289614	7.94416	0.00482427	0.053622	23.5946	1.18923e-06	5.06665e-05	CREB binding protein [Source:MGI Symbol;Acc:MGI:1098280]	16	4081328	4213997	-1	protein_coding	8	Crebbp	605	807	605	480	1.26042	1.68125	1.26042	1.68	1	1.26	0.75	CREB binding protein	1.2e-03 ( 6.8e-05)	7.2e-01 (1.2e-01)	5.2e-01 (2.5e-01)	7.2e-01 (1.2e-01)
ENSMUSG00000032116	0.0331473	0.855533	0.983022	19.1643	6.89488e-05	0.00120149	0.324711	0.850139	0.932218	4.55632	0.0327974	0.170347	3.88435	0.048738	0.219298	11.0974	0.000864482	0.0093817	STT3, subunit of the oligosaccharyltransferase complex, homolog A (S. cerevisiae) [Source:MGI Symbol;Acc:MGI:105124]	9	36729344	36767679	-1	protein_coding	9	Stt3a	2387	2411	1931	1843	1.29517	1.30819	1.04775	1.31	1.24	1.05	0.99	STT3, subunit of the oligosaccharyltransferase complex, homolog A (S. cerevisiae)	1.2e-03 ( 6.9e-05)	9.8e-01 (8.6e-01)	9.3e-01 (8.5e-01)	9.8e-01 (8.6e-01)
ENSMUSG00000042608	1.01167	0.314503	0.864418	19.141	6.97564e-05	0.00121406	13.4061	0.00122715	0.021477	15.3779	8.801e-05	0.00342344	16.1705	5.78885e-05	0.00286242	20.4641	6.07605e-06	0.000198895	serine/threonine kinase 40 [Source:MGI Symbol;Acc:MGI:1921428]	4	126103957	126141029	1	protein_coding	6	Stk40	726	949	562	616	1.17857	1.54058	0.912338	1.54	1.29	0.91	0.77	serine/threonine kinase 40	1.2e-03 ( 7.0e-05)	8.6e-01 (3.1e-01)	2.1e-02 (1.2e-03)	8.6e-01 (3.1e-01)
ENSMUSG00000020275	3.39583	0.0653616	0.616946	19.1322	7.00645e-05	0.0012179	7.78654	0.0203786	0.130387	18.0495	2.1523e-05	0.00129318	15.9145	6.62694e-05	0.00319951	18.4558	1.7389e-05	0.00045901	reticuloendotheliosis oncogene [Source:MGI Symbol;Acc:MGI:97897]	11	23736847	23770970	-1	protein_coding	1	Rel	135	222	133	96	1.40625	2.3125	1.38542	2.31	1.02	1.39	0.61	reticuloendotheliosis oncogene	1.2e-03 ( 7.0e-05)	6.2e-01 (6.5e-02)	1.3e-01 (2.0e-02)	6.2e-01 (6.5e-02)
ENSMUSG00000007570	0.361658	0.547587	0.934401	19.1165	7.06164e-05	0.00122446	2.02421	0.363454	0.635648	3.16304	0.0753228	0.272383	2.34037	0.12606	0.376481	9.66527	0.00187784	0.0168825	Fanconi anemia, complementation group E [Source:MGI Symbol;Acc:MGI:1920025]	17	28313530	28326568	1	protein_coding	14	Fance	154	180	257	299	0.51505	0.602007	0.859532	0.6	0.6	0.86	0.86	Fanconi anemia, complementation group E	1.2e-03 ( 7.1e-05)	9.3e-01 (5.5e-01)	6.4e-01 (3.6e-01)	9.3e-01 (5.5e-01)
ENSMUSG00000032372	0.334197	0.563198	0.936478	19.0991	7.12318e-05	0.00122957	2.31121	0.314866	0.594672	19.9298	8.03386e-06	0.000608291	17.4454	2.95683e-05	0.00174836	29.638	5.20729e-08	3.62009e-06	phospholipid scramblase 2 [Source:MGI Symbol;Acc:MGI:1270860]	9	92275602	92297752	1	protein_coding	5	Plscr2	581	487	641	784	0.741071	0.621173	0.817602	0.62	0.91	0.82	1.19	phospholipid scramblase 2	1.2e-03 ( 7.1e-05)	9.4e-01 (5.6e-01)	5.9e-01 (3.1e-01)	9.4e-01 (5.6e-01)
ENSMUSG00000001576	0.629444	0.427559	0.905798	19.0983	7.12631e-05	0.00122957	0.909482	0.634612	0.819805	5.47263	0.0193166	0.122632	5.11321	0.0237444	0.143973	16.6433	4.51082e-05	0.00098669	endoplasmic reticulum-golgi intermediate compartment (ERGIC) 1 [Source:MGI Symbol;Acc:MGI:1914708]	17	26561489	26656931	1	protein_coding	7	Ergic1	1755	1753	1345	1425	1.23158	1.23018	0.94386	1.23	1.3	0.94	1	endoplasmic reticulum-golgi intermediate compartment (ERGIC) 1	1.2e-03 ( 7.1e-05)	9.1e-01 (4.3e-01)	8.2e-01 (6.3e-01)	9.1e-01 (4.3e-01)
ENSMUSG00000019689	3.54399	0.0597616	0.603479	19.0908	7.15288e-05	0.00123264	6.41004	0.0405581	0.195364	14.9053	0.000113046	0.00406433	13.4719	0.000242162	0.00776411	19.9737	7.8516e-06	0.000246667	formation of mitochondrial complex V assembly factor 1 [Source:MGI Symbol;Acc:MGI:1913367]	6	38533502	38539449	1	protein_coding	2	Fmc1	871	616	1011	1135	0.767401	0.542731	0.890749	0.54	0.86	0.89	1.41	formation of mitochondrial complex V assembly factor 1	1.2e-03 ( 7.2e-05)	6.0e-01 (6.0e-02)	2.0e-01 (4.1e-02)	6.0e-01 (6.0e-02)
ENSMUSG00000046027	0.278865	0.597446	0.943833	19.0627	7.25406e-05	0.00124854	0.740632	0.690516	0.849814	2.91912	0.0875355	0.299246	2.73283	0.098305	0.329961	10.1581	0.00143667	0.0138186	StAR-related lipid transfer (START) domain containing 5 [Source:MGI Symbol;Acc:MGI:2156765]	7	83631959	83653127	1	protein_coding	5	Stard5	2275	2481	2481	3306	0.688143	0.750454	0.750454	0.75	0.92	0.75	0.92	StAR-related lipid transfer (START) domain containing 5	1.2e-03 ( 7.3e-05)	9.4e-01 (6.0e-01)	8.5e-01 (6.9e-01)	9.4e-01 (6.0e-01)
ENSMUSG00000025086	2.53827	0.111117	0.710383	19.037	7.34803e-05	0.00126161	3.33282	0.188924	0.454855	16.7825	4.19174e-05	0.00208376	15.1133	0.000101247	0.00423159	22.1472	2.5253e-06	9.50747e-05	TruB pseudouridine (psi) synthase family member 1 [Source:MGI Symbol;Acc:MGI:1919383]	19	57452906	57491005	1	protein_coding	2	Trub1	248	205	289	364	0.681319	0.563187	0.793956	0.56	0.86	0.79	1.21	TruB pseudouridine (psi) synthase family member 1	1.3e-03 ( 7.3e-05)	7.1e-01 (1.1e-01)	4.5e-01 (1.9e-01)	7.1e-01 (1.1e-01)
ENSMUSG00000015083	3.13842	0.0764681	0.63497	19.0253	7.39112e-05	0.0012659	6.93226	0.0312377	0.168315	15.9834	6.38988e-05	0.00278252	14.6882	0.000126839	0.00489342	24.137	8.97198e-07	4.13094e-05	complement component 8, gamma polypeptide [Source:MGI Symbol;Acc:MGI:88237]	2	25498651	25501719	-1	protein_coding	7	C8g	10165	6983	11922	11872	0.856216	0.588191	1.00421	0.59	0.85	1	1.46	complement component 8, gamma polypeptide	1.3e-03 ( 7.4e-05)	6.3e-01 (7.6e-02)	1.7e-01 (3.1e-02)	6.3e-01 (7.6e-02)
ENSMUSG00000017760	3.67453	0.0552499	0.588998	19.0112	7.44353e-05	0.00127332	9.13983	0.0103589	0.086435	9.15542	0.00247983	0.0334613	7.87572	0.0050103	0.0550559	11.4478	0.000715788	0.00806066	cathepsin A [Source:MGI Symbol;Acc:MGI:97748]	2	164832873	164841032	1	protein_coding	16	Ctsa	4312	5501	4073	3875	1.11277	1.41961	1.0511	1.42	1.06	1.05	0.78	cathepsin A	1.3e-03 ( 7.4e-05)	5.9e-01 (5.5e-02)	8.6e-02 (1.0e-02)	5.9e-01 (5.5e-02)
ENSMUSG00000028901	0.0190467	0.890233	0.986767	18.9936	7.50926e-05	0.00128299	0.750293	0.687188	0.848439	4.73404	0.0295713	0.158258	5.1722	0.0229512	0.141175	19.422	1.04793e-05	0.00030405	glucocorticoid modulatory element binding protein 1 [Source:MGI Symbol;Acc:MGI:2135604]	4	132221025	132261602	-1	protein_coding	7	Gmeb1	185	174	134	126	1.46825	1.38095	1.06349	1.38	1.38	1.06	1.06	glucocorticoid modulatory element binding protein 1	1.3e-03 ( 7.5e-05)	9.9e-01 (8.9e-01)	8.5e-01 (6.9e-01)	9.9e-01 (8.9e-01)
ENSMUSG00000027935	0.792977	0.373201	0.887872	18.9653	7.61602e-05	0.00129965	4.50561	0.105104	0.33595	10.2465	0.00136944	0.0224758	10.2495	0.00136721	0.0240598	14.9984	0.000107604	0.00194477	RAB13, member RAS oncogene family [Source:MGI Symbol;Acc:MGI:1927232]	3	90213695	90226385	1	protein_coding	3	Rab13	170	226	132	137	1.24088	1.64964	0.963504	1.65	1.29	0.96	0.75	RAB13, member RAS oncogene family	1.3e-03 ( 7.6e-05)	8.9e-01 (3.7e-01)	3.4e-01 (1.1e-01)	8.9e-01 (3.7e-01)
ENSMUSG00000027947	1.0099	0.314926	0.864418	18.9338	7.73701e-05	0.00131868	5.03934	0.080486	0.289522	1.54474	0.213914	0.492327	1.67166	0.196037	0.476453	5.27272	0.0216621	0.0978454	interleukin 6 receptor, alpha [Source:MGI Symbol;Acc:MGI:105304]	3	89864059	89913196	-1	protein_coding	2	Il6ra	1160	1216	1483	1795	0.64624	0.677437	0.826184	0.68	0.78	0.83	0.95	interleukin 6 receptor, alpha	1.3e-03 ( 7.7e-05)	8.6e-01 (3.1e-01)	2.9e-01 (8.0e-02)	8.6e-01 (3.1e-01)
ENSMUSG00000028826	7.82987	0.00513898	0.255025	18.9167	7.80356e-05	0.00132841	9.00095	0.0111037	0.0903394	0.361458	0.547698	0.787554	0.468624	0.493621	0.754618	3.77902	0.051899	0.178662	transmembrane protein 57 [Source:MGI Symbol;Acc:MGI:1913396]	4	134802759	134853345	-1	protein_coding	5	Tmem57	706	978	978	996	0.708835	0.981928	0.981928	0.98	0.72	0.98	0.72	transmembrane protein 57	1.3e-03 ( 7.8e-05)	2.6e-01 (5.1e-03)	9.0e-02 (1.1e-02)	2.6e-01 (5.1e-03)
ENSMUSG00000016409	4.70371	0.0300976	0.492425	18.8534	8.05443e-05	0.00136779	4.89864	0.0863522	0.301855	10.6179	0.00111995	0.0198634	8.91816	0.00282349	0.0385703	13.2116	0.000278229	0.00394924	NFKB activating protein [Source:MGI Symbol;Acc:MGI:1914300]	X	37126795	37150746	1	protein_coding	2	Nkap	166	124	175	229	0.724891	0.541485	0.764192	0.54	0.95	0.76	1.34	NFKB activating protein	1.4e-03 ( 8.1e-05)	4.9e-01 (3.0e-02)	3.0e-01 (8.6e-02)	4.9e-01 (3.0e-02)
ENSMUSG00000028158	0.0535527	0.816993	0.979456	18.8475	8.07838e-05	0.00137019	1.33501	0.512988	0.743623	2.89332	0.0889476	0.301974	2.49049	0.114536	0.35729	8.41603	0.00371928	0.0283185	microsomal triglyceride transfer protein [Source:MGI Symbol;Acc:MGI:106926]	3	138089854	138144968	-1	protein_coding	3	Mttp	8713	7379	7100	6113	1.42532	1.2071	1.16146	1.21	1.23	1.16	1.18	microsomal triglyceride transfer protein	1.4e-03 ( 8.1e-05)	9.8e-01 (8.2e-01)	7.4e-01 (5.1e-01)	9.8e-01 (8.2e-01)
ENSMUSG00000025159	2.04431	0.152776	0.769372	18.8328	8.13788e-05	0.00137861	54.6165	1.38097e-12	1.61033e-09	0.0586289	0.808676	0.923186	0.249123	0.617693	0.828257	0.611738	0.434134	0.667895	MMS19 (MET18 S. cerevisiae) [Source:MGI Symbol;Acc:MGI:1919449]	19	41941086	41981157	-1	protein_coding	18	Mms19	342	598	516	827	0.413543	0.723096	0.623942	0.72	0.66	0.62	0.57	MMS19 (MET18 S. cerevisiae)	1.4e-03 ( 8.1e-05)	7.7e-01 (1.5e-01)	1.6e-09 (1.4e-12)	7.7e-01 (1.5e-01)
ENSMUSG00000037465	1.08345	0.297927	0.857999	18.8089	8.23563e-05	0.0013918	1.15905	0.560165	0.773933	10.9224	0.000950104	0.0176177	8.79343	0.00302317	0.0399383	16.769	4.22172e-05	0.000936581	Kruppel-like factor 10 [Source:MGI Symbol;Acc:MGI:1101353]	15	38291463	38300706	-1	protein_coding	6	Klf10	1578	1793	979	576	2.73958	3.11285	1.69965	3.11	1.61	1.7	0.88	Kruppel-like factor 10	1.4e-03 ( 8.2e-05)	8.6e-01 (3.0e-01)	7.7e-01 (5.6e-01)	8.6e-01 (3.0e-01)
ENSMUSG00000000957	2.94503	0.0861421	0.656005	18.7933	8.30012e-05	0.00139932	3.37623	0.184867	0.450182	1.58341	0.208271	0.484768	1.74863	0.186049	0.465109	13.8446	0.000198565	0.00305416	matrix metallopeptidase 14 (membrane-inserted) [Source:MGI Symbol;Acc:MGI:101900]	14	54431612	54445364	1	protein_coding	7	Mmp14	771	852	659	654	1.1789	1.30275	1.00765	1.3	1.17	1.01	0.9	matrix metallopeptidase 14 (membrane-inserted)	1.4e-03 ( 8.3e-05)	6.6e-01 (8.6e-02)	4.5e-01 (1.8e-01)	6.6e-01 (8.6e-02)
ENSMUSG00000020715	0.0235448	0.878049	0.98478	18.7735	8.38277e-05	0.00141155	0.0237192	0.98821	0.994668	7.58419	0.00588823	0.0585422	6.75387	0.00935444	0.083512	13.1792	0.000283076	0.00400729	endoplasmic reticulum (ER) to nucleus signalling 1 [Source:MGI Symbol;Acc:MGI:1930134]	11	106394650	106487852	-1	protein_coding	5	Ern1	1113	1039	787	811	1.37238	1.28113	0.970407	1.28	1.41	0.97	1.07	endoplasmic reticulum (ER) to nucleus signalling 1	1.4e-03 ( 8.4e-05)	9.8e-01 (8.8e-01)	9.9e-01 (9.9e-01)	9.8e-01 (8.8e-01)
ENSMUSG00000035878	1.5314	0.215903	0.809741	18.7708	8.39424e-05	0.00141179	1.61714	0.445496	0.697608	6.03834	0.0139985	0.100937	5.96696	0.0145764	0.108362	15.2846	9.24665e-05	0.00171366	hydroxylysine kinase 1 [Source:MGI Symbol;Acc:MGI:2443139]	9	54917283	54949924	1	protein_coding	4	Hykk	1272	1231	1543	2155	0.590255	0.57123	0.716009	0.57	0.82	0.72	1.03	hydroxylysine kinase 1	1.4e-03 ( 8.4e-05)	8.1e-01 (2.2e-01)	7.0e-01 (4.5e-01)	8.1e-01 (2.2e-01)
ENSMUSG00000042978	0.205633	0.650212	0.948373	18.7681	8.40528e-05	0.00141195	9.3445	0.0093512	0.0808338	1.82471	0.176754	0.443819	1.5709	0.210077	0.494391	4.28	0.0385633	0.147367	SH3-binding kinase 1 [Source:MGI Symbol;Acc:MGI:2135937]	7	126272619	126295016	1	protein_coding	3	Sbk1	657	842	842	1127	0.582964	0.747116	0.747116	0.75	0.78	0.75	0.78	SH3-binding kinase 1	1.4e-03 ( 8.4e-05)	9.5e-01 (6.5e-01)	8.1e-02 (9.4e-03)	9.5e-01 (6.5e-01)
ENSMUSG00000021751	0.840198	0.35934	0.883905	18.7637	8.42389e-05	0.00141338	7.57467	0.0226559	0.139919	3.83201	0.0502825	0.216575	3.78843	0.0516082	0.226692	9.45936	0.00210074	0.0183234	acyl-Coenzyme A oxidase 2, branched chain [Source:MGI Symbol;Acc:MGI:1934852]	14	8225511	8259353	-1	protein_coding	8	Acox2	4177	5616	3448	3616	1.15514	1.5531	0.95354	1.55	1.21	0.95	0.74	acyl-Coenzyme A oxidase 2, branched chain	1.4e-03 ( 8.4e-05)	8.8e-01 (3.6e-01)	1.4e-01 (2.3e-02)	8.8e-01 (3.6e-01)
ENSMUSG00000022965	2.03918	0.153292	0.769372	18.7464	8.49718e-05	0.00142396	13.2104	0.00135331	0.0229908	6.06417	0.0137952	0.100242	6.75139	0.00936747	0.0835752	11.4708	0.000706978	0.00799363	interferon gamma receptor 2 [Source:MGI Symbol;Acc:MGI:107654]	16	91547072	91565623	1	protein_coding	3	Ifngr2	491	405	679	489	1.00409	0.828221	1.38855	0.83	0.72	1.39	1.21	interferon gamma receptor 2	1.4e-03 ( 8.5e-05)	7.7e-01 (1.5e-01)	2.3e-02 (1.4e-03)	7.7e-01 (1.5e-01)
ENSMUSG00000037339	0.0142727	0.904904	0.988472	18.7113	8.6477e-05	0.00144573	0.804692	0.668749	0.838557	4.27313	0.0387195	0.186553	3.04687	0.0808928	0.293647	11.754	0.00060713	0.0071367	family with sequence similarity 53, member A [Source:MGI Symbol;Acc:MGI:1919225]	5	33600347	33629635	-1	protein_coding	8	Fam53a	547	548	684	775	0.705806	0.707097	0.882581	0.71	0.8	0.88	1	family with sequence similarity 53, member A	1.4e-03 ( 8.6e-05)	9.9e-01 (9.0e-01)	8.4e-01 (6.7e-01)	9.9e-01 (9.0e-01)
ENSMUSG00000055866	0.0688695	0.79299	0.976452	18.6742	8.80941e-05	0.001471	0.247036	0.883806	0.94738	3.38825	0.0656625	0.251859	3.09501	0.0785325	0.288473	14.7586	0.000122191	0.0021263	period circadian clock 2 [Source:MGI Symbol;Acc:MGI:1195265]	1	91415982	91459324	-1	protein_coding	2	Per2	357	395	395	749	0.476636	0.52737	0.52737	0.53	0.9	0.53	0.9	period circadian clock 2	1.5e-03 ( 8.8e-05)	9.8e-01 (7.9e-01)	9.5e-01 (8.8e-01)	9.8e-01 (7.9e-01)
ENSMUSG00000021773	0.363306	0.546676	0.934401	18.6656	8.84737e-05	0.00147382	5.51961	0.0633042	0.251938	10.1105	0.00147426	0.0235505	10.0206	0.00154796	0.0260866	12.3248	0.000446977	0.00560502	catechol-O-methyltransferase domain containing 1 [Source:MGI Symbol;Acc:MGI:1916406]	14	21845855	21848977	-1	protein_coding	4	Comtd1	165	230	144	131	1.25954	1.75573	1.09924	1.76	1.15	1.1	0.72	catechol-O-methyltransferase domain containing 1	1.5e-03 ( 8.8e-05)	9.3e-01 (5.5e-01)	2.5e-01 (6.3e-02)	9.3e-01 (5.5e-01)
ENSMUSG00000020056	1.31453	0.251576	0.835475	18.6372	8.97396e-05	0.00149136	7.45079	0.0241035	0.144756	10.8118	0.00100855	0.0183813	11.9462	0.000547585	0.013102	18.0477	2.15441e-05	0.000545354	WASH complex subunit 3 [Source:MGI Symbol;Acc:MGI:1914532]	10	88201093	88246158	1	protein_coding	8	Washc3	539	442	579	648	0.83179	0.682099	0.893519	0.68	0.93	0.89	1.22	WASH complex subunit 3	1.5e-03 ( 9.0e-05)	8.4e-01 (2.5e-01)	1.4e-01 (2.4e-02)	8.4e-01 (2.5e-01)
ENSMUSG00000004936	0.0129422	0.909425	0.989072	18.6153	9.07271e-05	0.0015042	13.5276	0.00115486	0.0206385	16.4673	4.94966e-05	0.00232617	19.5079	1.00182e-05	0.00074833	20.8887	4.86765e-06	0.00016713	mitogen-activated protein kinase kinase 1 [Source:MGI Symbol;Acc:MGI:1346866]	9	64185770	64253631	-1	protein_coding	4	Map2k1	794	594	1083	885	0.897175	0.671186	1.22373	0.67	0.73	1.22	1.34	mitogen-activated protein kinase kinase 1	1.5e-03 ( 9.1e-05)	9.9e-01 (9.1e-01)	2.1e-02 (1.2e-03)	9.9e-01 (9.1e-01)
ENSMUSG00000027660	0.450477	0.502108	0.924817	18.6127	9.08473e-05	0.00150441	7.79334	0.0203094	0.130123	18.9881	1.31539e-05	0.000881236	21.1514	4.24394e-06	0.000399984	33.4278	7.39593e-09	6.83297e-07	SKI-like [Source:MGI Symbol;Acc:MGI:106203]	3	31095058	31122577	1	protein_coding	6	Skil	238	402	209	196	1.21429	2.05102	1.06633	2.05	1.14	1.07	0.59	SKI-like	1.5e-03 ( 9.1e-05)	9.2e-01 (5.0e-01)	1.3e-01 (2.0e-02)	9.2e-01 (5.0e-01)
ENSMUSG00000018882	0.953038	0.328947	0.868592	18.5709	9.27652e-05	0.00153435	1.17234	0.556453	0.771547	12.2084	0.000475736	0.0112	11.0272	0.000897864	0.0183266	30.2633	3.77199e-08	2.81755e-06	mitochondrial ribosomal protein L45 [Source:MGI Symbol;Acc:MGI:1914286]	11	97315716	97329920	1	protein_coding	2	Mrpl45	653	579	722	852	0.766432	0.679577	0.847418	0.68	0.9	0.85	1.13	mitochondrial ribosomal protein L45	1.5e-03 ( 9.3e-05)	8.7e-01 (3.3e-01)	7.7e-01 (5.6e-01)	8.7e-01 (3.3e-01)
ENSMUSG00000015501	13.3388	0.000259964	0.0544417	18.5641	9.30783e-05	0.00153772	60.7219	6.52243e-14	1.14085e-10	17.6277	2.68645e-05	0.00151608	17.0861	3.5723e-05	0.00199864	8.21702	0.00414993	0.0308021	human immunodeficiency virus type I enhancer binding protein 2 [Source:MGI Symbol;Acc:MGI:1338076]	10	13966075	14151374	1	protein_coding	6	Hivep2	129	393	149	235	0.548936	1.67234	0.634043	1.67	0.87	0.63	0.33	human immunodeficiency virus type I enhancer binding protein 2	1.5e-03 ( 9.3e-05)	5.4e-02 (2.6e-04)	1.1e-10 (6.5e-14)	5.4e-02 (2.6e-04)
ENSMUSG00000030403	0.108822	0.741489	0.965341	18.5169	9.53006e-05	0.00157257	0.898268	0.638181	0.821918	4.05392	0.0440689	0.200671	3.76096	0.0524624	0.228642	13.7644	0.000207229	0.00315631	vasodilator-stimulated phosphoprotein [Source:MGI Symbol;Acc:MGI:109268]	7	19256929	19271817	-1	protein_coding	4	Vasp	473	444	355	301	1.57143	1.47508	1.1794	1.48	1.33	1.18	1.07	vasodilator-stimulated phosphoprotein	1.6e-03 ( 9.5e-05)	9.7e-01 (7.4e-01)	8.2e-01 (6.4e-01)	9.7e-01 (7.4e-01)
ENSMUSG00000020604	6.80489	0.00909085	0.319016	18.509	9.56791e-05	0.00157696	11.0459	0.003994	0.0477675	0.0609619	0.804982	0.921171	0.103441	0.747738	0.894793	1.38995	0.238414	0.470165	arylsulfatase G [Source:MGI Symbol;Acc:MGI:1921258]	11	109473374	109573330	1	protein_coding	5	Arsg	551	323	319	320	1.72188	1.00937	0.996875	1.01	1.73	1	1.71	arylsulfatase G	1.6e-03 ( 9.6e-05)	3.2e-01 (9.1e-03)	4.8e-02 (4.0e-03)	3.2e-01 (9.1e-03)
ENSMUSG00000053219	0.19007	0.662858	0.950037	18.503	9.59656e-05	0.00157982	0.192418	0.908274	0.958471	3.35664	0.0669346	0.25461	2.23642	0.134793	0.389967	8.65658	0.00325883	0.0257159	retinoic acid early transcript 1E [Source:MGI Symbol;Acc:MGI:2675273]	10	22158569	22374139	1	protein_coding	4	Raet1e	365	313	131	51	7.15686	6.13725	2.56863	6.14	2.79	2.57	1.17	retinoic acid early transcript 1E	1.6e-03 ( 9.6e-05)	9.5e-01 (6.6e-01)	9.6e-01 (9.1e-01)	9.5e-01 (6.6e-01)
ENSMUSG00000023004	3.34164	0.0675472	0.618258	18.4991	9.61542e-05	0.00158106	20.5629	3.4262e-05	0.0017626	0.295523	0.586703	0.810321	0.105268	0.745597	0.893763	2.63706	0.104397	0.282994	tubulin, alpha 1B [Source:MGI Symbol;Acc:MGI:107804]	15	98931425	98934565	-1	protein_coding	2	Tuba1b	2453	1761	1905	1245	1.97028	1.41446	1.53012	1.41	1.29	1.53	1.39	tubulin, alpha 1B	1.6e-03 ( 9.6e-05)	6.2e-01 (6.8e-02)	1.8e-03 (3.4e-05)	6.2e-01 (6.8e-02)
ENSMUSG00000024871	0.388228	0.533232	0.932935	18.4952	9.63449e-05	0.00158234	0.390695	0.822549	0.918891	11.5039	0.000694494	0.0143807	10.6089	0.00112545	0.0214156	15.9115	6.63729e-05	0.00132397	double C2, gamma [Source:MGI Symbol;Acc:MGI:1926250]	19	4003321	4007005	1	protein_coding	4	Doc2g	53	52	82	100	0.53	0.52	0.82	0.52	0.65	0.82	1.02	double C2, gamma	1.6e-03 ( 9.6e-05)	9.3e-01 (5.3e-01)	9.2e-01 (8.2e-01)	9.3e-01 (5.3e-01)
ENSMUSG00000034300	0.00213165	0.963175	0.996092	18.4669	9.77136e-05	0.00160294	1.55961	0.458496	0.706502	7.6157	0.00578624	0.0579984	7.13198	0.00757209	0.0726501	14.2246	0.000162235	0.00261184	family with sequence similarity 53, member C [Source:MGI Symbol;Acc:MGI:1913556]	18	34758906	34773760	1	protein_coding	2	Fam53c	421	476	369	348	1.20977	1.36782	1.06034	1.37	1.14	1.06	0.88	family with sequence similarity 53, member C	1.6e-03 ( 9.8e-05)	1.0e+00 (9.6e-01)	7.1e-01 (4.6e-01)	1.0e+00 (9.6e-01)
ENSMUSG00000051391	1.64251	0.199981	0.799542	18.4588	9.8114e-05	0.00160762	1.81327	0.403882	0.66748	6.08116	0.0136631	0.0995455	5.68965	0.0170653	0.119764	11.6345	0.000647392	0.00748258	tyrosine 3-monooxygenase/tryptophan 5-monooxygenase activation protein, gamma polypeptide [Source:MGI Symbol;Acc:MGI:108109]	5	135908409	135934616	-1	protein_coding	5	Ywhag	2856	2958	2485	2068	1.38104	1.43037	1.20164	1.43	1.15	1.2	0.97	tyrosine 3-monooxygenase/tryptophan 5-monooxygenase activation protein, gamma polypeptide	1.6e-03 ( 9.8e-05)	8.0e-01 (2.0e-01)	6.7e-01 (4.0e-01)	8.0e-01 (2.0e-01)
ENSMUSG00000025795	0.0270542	0.869352	0.98478	18.45	9.85469e-05	0.00161283	3.72644	0.155172	0.411126	11.4028	0.000733343	0.0149365	13.0368	0.000305434	0.00897207	22.4608	2.14479e-06	8.23144e-05	Ras association (RalGDS/AF-6) domain family member 3 [Source:MGI Symbol;Acc:MGI:2179722]	10	121410350	121476347	-1	protein_coding	2	Rassf3	1590	1356	2076	2157	0.737135	0.628651	0.962448	0.63	0.77	0.96	1.17	Ras association (RalGDS/AF-6) domain family member 3	1.6e-03 ( 9.9e-05)	9.8e-01 (8.7e-01)	4.1e-01 (1.6e-01)	9.8e-01 (8.7e-01)
ENSMUSG00000003949	2.96576	0.0850443	0.653817	18.441	9.89902e-05	0.00161819	3.59437	0.165765	0.425215	5.53382	0.0186523	0.120245	4.89164	0.026987	0.155275	15.196	9.69089e-05	0.00178127	hepatic leukemia factor [Source:MGI Symbol;Acc:MGI:96108]	11	90336536	90390895	-1	protein_coding	6	Hlf	804	846	972	1322	0.608169	0.639939	0.73525	0.64	0.83	0.74	0.95	hepatic leukemia factor	1.6e-03 ( 9.9e-05)	6.5e-01 (8.5e-02)	4.3e-01 (1.7e-01)	6.5e-01 (8.5e-02)
ENSMUSG00000022911	8.36937	0.00381599	0.224673	18.4291	9.95812e-05	0.00162595	23.2757	8.82543e-06	0.000623708	0.0879938	0.766743	0.904795	0.0985913	0.753527	0.898126	0.703122	0.401737	0.639056	ADP-ribosylation factor-like 13B [Source:MGI Symbol;Acc:MGI:1915396]	16	62793685	62847040	-1	protein_coding	4	Arl13b	91	176	176	179	0.50838	0.98324	0.98324	0.98	0.52	0.98	0.52	ADP-ribosylation factor-like 13B	1.6e-03 ( 1.0e-04)	2.2e-01 (3.8e-03)	6.2e-04 (8.8e-06)	2.2e-01 (3.8e-03)
ENSMUSG00000031770	10.2078	0.00139846	0.131921	18.4172	0.000100174	0.00163373	10.9359	0.00421978	0.048974	7.83074	0.00513651	0.0536644	6.27028	0.012278	0.0975541	6.24115	0.0124815	0.0673888	homocysteine-inducible, endoplasmic reticulum stress-inducible, ubiquitin-like domain member 1 [Source:MGI Symbol;Acc:MGI:1927406]	8	94386438	94395377	1	protein_coding	6	Herpud1	20828	22681	20828	16134	1.29094	1.40579	1.29094	1.41	1	1.29	0.92	homocysteine-inducible, endoplasmic reticulum stress-inducible, ubiquitin-like domain member 1	1.6e-03 ( 1.0e-04)	1.3e-01 (1.4e-03)	4.9e-02 (4.2e-03)	1.3e-01 (1.4e-03)
ENSMUSG00000025227	3.15104	0.0758785	0.63464	18.3999	0.000101042	0.00164597	3.1533	0.206666	0.47472	1.17517	0.278341	0.566473	0.936166	0.333266	0.629801	10.5024	0.00119222	0.0119845	major facilitator superfamily domain containing 13a [Source:MGI Symbol;Acc:MGI:1922396]	19	46341121	46375252	1	protein_coding	5	Mfsd13a	176	141	86	78	2.25641	1.80769	1.10256	1.81	2.05	1.1	1.25	major facilitator superfamily domain containing 13a	1.6e-03 ( 1.0e-04)	6.3e-01 (7.6e-02)	4.7e-01 (2.1e-01)	6.3e-01 (7.6e-02)
ENSMUSG00000115338	0.000984364	0.974971	0.996381	18.372	0.000102462	0.00166522	0.00127052	0.999365	0.999832	2.88927	0.0891714	0.30251	2.97352	0.0846376	0.301653	9.92166	0.00163345	0.015181	purine-nucleoside phosphorylase [Source:MGI Symbol;Acc:MGI:97365]	14	50931082	50965237	1	protein_coding	5	Pnp	1806	1835	1559	1125	1.60533	1.63111	1.38578	1.63	1.16	1.39	0.98	purine-nucleoside phosphorylase	1.7e-03 ( 1.0e-04)	1.0e+00 (9.7e-01)	1.0e+00 (1.0e+00)	1.0e+00 (9.7e-01)
ENSMUSG00000026289	3.15052	0.0759029	0.63464	18.3408	0.000104076	0.00168722	3.17733	0.204199	0.471899	16.265	5.50717e-05	0.00248635	13.1575	0.000286376	0.00872697	24.3619	7.98312e-07	3.72449e-05	autophagy related 16-like 1 (S. cerevisiae) [Source:MGI Symbol;Acc:MGI:1924290]	1	87755870	87792428	1	protein_coding	11	Atg16l1	626	594	665	893	0.701008	0.665174	0.744681	0.67	0.94	0.74	1.05	autophagy related 16-like 1 (S. cerevisiae)	1.7e-03 ( 1.0e-04)	6.3e-01 (7.6e-02)	4.7e-01 (2.0e-01)	6.3e-01 (7.6e-02)
ENSMUSG00000037822	6.33565e-05	0.993649	0.999088	18.3388	0.000104177	0.00168722	0.445862	0.80017	0.907651	1.96046	0.161464	0.423014	1.87948	0.170393	0.446182	10.4426	0.00123139	0.0122294	small integral membrane protein 14 [Source:MGI Symbol;Acc:MGI:1915802]	5	65446844	65537184	-1	protein_coding	9	Smim14	2306	2151	1749	1709	1.34933	1.25863	1.02341	1.26	1.32	1.02	1.07	small integral membrane protein 14	1.7e-03 ( 1.0e-04)	1.0e+00 (9.9e-01)	9.1e-01 (8.0e-01)	1.0e+00 (9.9e-01)
ENSMUSG00000029059	1.69744	0.192623	0.792114	18.3143	0.000105461	0.00170602	3.73562	0.154461	0.41044	1.77608	0.182631	0.452552	2.15088	0.142489	0.402771	5.87588	0.0153497	0.0775382	family with sequence similarity 213, member B [Source:MGI Symbol;Acc:MGI:1913719]	4	154895504	154899135	-1	protein_coding	3	Fam213b	534	525	329	358	1.49162	1.46648	0.918994	1.47	1.62	0.92	1.02	family with sequence similarity 213, member B	1.7e-03 ( 1.1e-04)	7.9e-01 (1.9e-01)	4.1e-01 (1.5e-01)	7.9e-01 (1.9e-01)
ENSMUSG00000021922	2.68241	0.101462	0.691671	18.295	0.000106488	0.00172065	5.86846	0.0531716	0.229073	8.8074	0.0030001	0.0374877	6.04016	0.013984	0.105864	10.8673	0.000978793	0.0102806	inter alpha-trypsin inhibitor, heavy chain 4 [Source:MGI Symbol;Acc:MGI:109536]	14	30886476	30902353	1	protein_coding	5	Itih4	43112	52732	39062	36882	1.16892	1.42975	1.05911	1.43	1.1	1.06	0.82	inter alpha-trypsin inhibitor, heavy chain 4	1.7e-03 ( 1.1e-04)	6.9e-01 (1.0e-01)	2.3e-01 (5.3e-02)	6.9e-01 (1.0e-01)
ENSMUSG00000109764	0.248573	0.618082	0.946136	18.2599	0.000108372	0.00174907	10.0363	0.0066169	0.0649479	9.98712	0.00157639	0.0247796	10.1884	0.0014133	0.0246853	18.0693	2.13006e-05	0.000542876	kallikrein B, plasma 1 [Source:MGI Symbol;Acc:MGI:102849]	8	45266689	45294859	-1	protein_coding	1	Klkb1	10156	7661	11408	10050	1.01055	0.762289	1.13512	0.76	0.89	1.14	1.33	kallikrein B, plasma 1	1.7e-03 ( 1.1e-04)	9.5e-01 (6.2e-01)	6.5e-02 (6.6e-03)	9.5e-01 (6.2e-01)
ENSMUSG00000029167	3.80021	0.051246	0.575728	18.2516	0.000108822	0.0017523	10.5687	0.00507021	0.0554956	17.2127	3.34202e-05	0.0017654	15.5234	8.14901e-05	0.00364447	23.8202	1.05766e-06	4.65604e-05	peroxisome proliferative activated receptor, gamma, coactivator 1 alpha [Source:MGI Symbol;Acc:MGI:1342774]	5	51454250	51567726	-1	protein_coding	5	Ppargc1a	329	556	286	197	1.67005	2.82234	1.45178	2.82	1.15	1.45	0.59	peroxisome proliferative activated receptor, gamma, coactivator 1 alpha	1.8e-03 ( 1.1e-04)	5.8e-01 (5.1e-02)	5.5e-02 (5.1e-03)	5.8e-01 (5.1e-02)
ENSMUSG00000053617	11.3729	0.000745242	0.0975429	18.2329	0.000109844	0.00176469	11.4304	0.00329556	0.0418085	0.0600062	0.806486	0.921526	0.144482	0.703865	0.873849	2.09603	0.147682	0.352224	SH3 and PX domains 2A [Source:MGI Symbol;Acc:MGI:1298393]	19	47260174	47464411	-1	protein_coding	2	Sh3pxd2a	604	426	426	484	1.24793	0.880165	0.880165	0.88	1.42	0.88	1.42	SH3 and PX domains 2A	1.8e-03 ( 1.1e-04)	9.8e-02 (7.5e-04)	4.2e-02 (3.3e-03)	9.8e-02 (7.5e-04)
ENSMUSG00000017723	5.58347	0.0181308	0.405657	18.2338	0.000109793	0.00176469	5.60402	0.0606879	0.246082	0.260378	0.609861	0.824271	0.315427	0.574369	0.805378	11.2066	0.000815065	0.0089282	WAP four-disulfide core domain 2 [Source:MGI Symbol;Acc:MGI:1914951]	2	164562413	164568510	1	protein_coding	5	Wfdc2	364	246	178	213	1.70892	1.15493	0.835681	1.15	2.04	0.84	1.48	WAP four-disulfide core domain 2	1.8e-03 ( 1.1e-04)	4.1e-01 (1.8e-02)	2.5e-01 (6.1e-02)	4.1e-01 (1.8e-02)
ENSMUSG00000022940	3.66236	0.0556547	0.590158	18.226	0.000110223	0.00176876	4.32566	0.114999	0.351966	9.24568	0.00236052	0.0323175	8.26286	0.00404644	0.0479528	9.56339	0.00198496	0.0175534	phosphatidylinositol glycan anchor biosynthesis, class P [Source:MGI Symbol;Acc:MGI:1860433]	16	94358763	94371842	-1	protein_coding	8	Pigp	461	570	434	384	1.20052	1.48438	1.13021	1.48	1.06	1.13	0.81	phosphatidylinositol glycan anchor biosynthesis, class P	1.8e-03 ( 1.1e-04)	5.9e-01 (5.6e-02)	3.5e-01 (1.1e-01)	5.9e-01 (5.6e-02)
ENSMUSG00000062937	0.802629	0.370308	0.887872	18.2231	0.000110381	0.00176925	7.76917	0.0205564	0.130986	0.306041	0.58012	0.807561	0.150991	0.69759	0.870684	2.62162	0.105417	0.285015	methylthioadenosine phosphorylase [Source:MGI Symbol;Acc:MGI:1914152]	4	89137122	89181081	1	protein_coding	2	Mtap	531	399	385	282	1.88298	1.41489	1.36525	1.41	1.38	1.37	1.33	methylthioadenosine phosphorylase	1.8e-03 ( 1.1e-04)	8.9e-01 (3.7e-01)	1.3e-01 (2.1e-02)	8.9e-01 (3.7e-01)
ENSMUSG00000037017	6.27316	0.012258	0.360426	18.212	0.000110999	0.00177712	7.25239	0.0266173	0.154176	10.8583	0.000983561	0.0180582	11.2655	0.000789619	0.0168567	13.0673	0.000300502	0.00419507	zinc finger and SCAN domain containing 21 [Source:MGI Symbol;Acc:MGI:99182]	5	138116903	138134265	1	protein_coding	7	Zscan21	517	694	517	423	1.22222	1.64066	1.22222	1.64	1	1.22	0.74	zinc finger and SCAN domain containing 21	1.8e-03 ( 1.1e-04)	3.6e-01 (1.2e-02)	1.5e-01 (2.7e-02)	3.6e-01 (1.2e-02)
ENSMUSG00000022350	6.29871	0.0120826	0.360426	18.2026	0.000111518	0.0017828	8.52366	0.0140965	0.105822	15.7013	7.41742e-05	0.00309509	13.4652	0.000243023	0.00777398	12.8403	0.000339228	0.0045456	WASH complex subunit 5 [Source:MGI Symbol;Acc:MGI:2146110]	15	59331997	59374167	-1	protein_coding	2	Washc5	445	658	445	420	1.05952	1.56667	1.05952	1.57	1	1.06	0.68	WASH complex subunit 5	1.8e-03 ( 1.1e-04)	3.6e-01 (1.2e-02)	1.1e-01 (1.4e-02)	3.6e-01 (1.2e-02)
ENSMUSG00000035759	2.10101	0.147202	0.765376	18.201	0.000111608	0.0017828	3.55839	0.168774	0.429002	2.72468	0.0988079	0.321727	2.09476	0.147805	0.411751	11.7151	0.000619952	0.00724291	Bardet-Biedl syndrome 10 (human) [Source:MGI Symbol;Acc:MGI:1919019]	10	111298679	111301727	1	protein_coding	2	Bbs10	78	58	80	194	0.402062	0.298969	0.412371	0.3	0.98	0.41	1.34	Bardet-Biedl syndrome 10 (human)	1.8e-03 ( 1.1e-04)	7.7e-01 (1.5e-01)	4.3e-01 (1.7e-01)	7.7e-01 (1.5e-01)
ENSMUSG00000025188	0.380833	0.537158	0.932964	18.1909	0.000112175	0.00178778	7.75089	0.0207451	0.131828	5.8401	0.0156649	0.108449	5.98727	0.0144095	0.107691	12.6683	0.000371901	0.00488094	HPS1, biogenesis of lysosomal organelles complex 3 subunit 1 [Source:MGI Symbol;Acc:MGI:2177763]	19	42755105	42779978	-1	protein_coding	9	Hps1	168	226	121	134	1.25373	1.68657	0.902985	1.69	1.39	0.9	0.74	HPS1, biogenesis of lysosomal organelles complex 3 subunit 1	1.8e-03 ( 1.1e-04)	9.3e-01 (5.4e-01)	1.3e-01 (2.1e-02)	9.3e-01 (5.4e-01)
ENSMUSG00000089943	0.0119824	0.912834	0.989072	18.1655	0.000113609	0.00180857	0.45859	0.795094	0.905359	5.16681	0.0230224	0.136118	5.91268	0.0150323	0.110706	18.5782	1.63078e-05	0.000435382	UDP glucuronosyltransferase 1 family, polypeptide A5 [Source:MGI Symbol;Acc:MGI:3032634]	1	88166012	88218997	1	protein_coding	1	Ugt1a5	681	820	1484	2217	0.307172	0.369869	0.669373	0.37	0.46	0.67	0.83	UDP glucuronosyltransferase 1 family, polypeptide A5	1.8e-03 ( 1.1e-04)	9.9e-01 (9.1e-01)	9.1e-01 (8.0e-01)	9.9e-01 (9.1e-01)
ENSMUSG00000027983	4.50056	0.0338838	0.508627	18.1247	0.000115951	0.00184376	11.8882	0.00262121	0.0359595	9.36875	0.00220716	0.0310445	9.35236	0.00222698	0.0331242	16.1399	5.88329e-05	0.00120788	cytochrome P450, family 2, subfamily u, polypeptide 1 [Source:MGI Symbol;Acc:MGI:1918769]	3	131288441	131303227	-1	protein_coding	3	Cyp2u1	546	189	546	576	0.947917	0.328125	0.947917	0.33	1	0.95	2.89	cytochrome P450, family 2, subfamily u, polypeptide 1	1.8e-03 ( 1.2e-04)	5.1e-01 (3.4e-02)	3.6e-02 (2.6e-03)	5.1e-01 (3.4e-02)
ENSMUSG00000022635	0.105943	0.744811	0.965954	18.115	0.000116513	0.00185058	0.76433	0.682382	0.845386	6.85488	0.00883994	0.0764611	6.82017	0.00901341	0.0816089	11.1472	0.000841568	0.00917693	zinc finger CCHC-type and RNA binding motif 1 [Source:MGI Symbol;Acc:MGI:1914447]	15	93386097	93398334	-1	protein_coding	8	Zcrb1	817	798	988	1074	0.760708	0.743017	0.919926	0.74	0.83	0.92	1.02	zinc finger CCHC-type and RNA binding motif 1	1.9e-03 ( 1.2e-04)	9.7e-01 (7.4e-01)	8.5e-01 (6.8e-01)	9.7e-01 (7.4e-01)
ENSMUSG00000032932	1.20141	0.273039	0.847315	18.1086	0.000116886	0.00185441	12.5977	0.00183842	0.0281764	0.191603	0.661586	0.853239	0.100051	0.751769	0.896873	2.0812	0.149123	0.354517	heat shock protein 70 family, member 13 [Source:MGI Symbol;Acc:MGI:1309463]	16	75745431	75767104	-1	protein_coding	4	Hspa13	962	739	739	422	2.27962	1.75118	1.75118	1.75	1.3	1.75	1.3	heat shock protein 70 family, member 13	1.9e-03 ( 1.2e-04)	8.5e-01 (2.7e-01)	2.8e-02 (1.8e-03)	8.5e-01 (2.7e-01)
ENSMUSG00000023353	0.164703	0.684863	0.956288	18.0947	0.000117701	0.00186521	1.60292	0.448674	0.700469	3.58308	0.058371	0.235295	2.70847	0.0998165	0.332398	6.09303	0.0135716	0.0711809	ArfGAP with GTPase domain, ankyrin repeat and PH domain 3 [Source:MGI Symbol;Acc:MGI:2183446]	5	24452177	24502047	1	protein_coding	6	Agap3	668	698	838	1013	0.659427	0.689042	0.827246	0.69	0.8	0.83	0.96	ArfGAP with GTPase domain, ankyrin repeat and PH domain 3	1.9e-03 ( 1.2e-04)	9.6e-01 (6.8e-01)	7.0e-01 (4.5e-01)	9.6e-01 (6.8e-01)
ENSMUSG00000036904	0.327756	0.566983	0.936478	18.0909	0.000117926	0.00186668	4.98455	0.0827214	0.29431	1.01859	0.312853	0.601744	0.705242	0.401028	0.686701	6.43418	0.0111945	0.0624817	frizzled class receptor 8 [Source:MGI Symbol;Acc:MGI:108460]	18	9212856	9216201	1	protein_coding	1	Fzd8	178	218	253	320	0.55625	0.68125	0.790625	0.68	0.7	0.79	0.82	frizzled class receptor 8	1.9e-03 ( 1.2e-04)	9.4e-01 (5.7e-01)	2.9e-01 (8.3e-02)	9.4e-01 (5.7e-01)
ENSMUSG00000014496	0.510594	0.474882	0.915782	18.0779	0.000118696	0.00187674	5.91645	0.0519109	0.225937	13.6401	0.000221406	0.00654241	12.7763	0.00035103	0.00978079	27.793	1.35011e-07	8.07995e-06	ankyrin repeat domain 28 [Source:MGI Symbol;Acc:MGI:2145661]	14	31698768	31830651	-1	protein_coding	10	Ankrd28	665	467	709	715	0.93007	0.653147	0.991608	0.65	0.94	0.99	1.42	ankyrin repeat domain 28	1.9e-03 ( 1.2e-04)	9.2e-01 (4.7e-01)	2.3e-01 (5.2e-02)	9.2e-01 (4.7e-01)
ENSMUSG00000020572	2.1932	0.138621	0.755205	18.0545	0.000120095	0.00189671	2.21696	0.330061	0.607543	2.24536	0.134016	0.384778	2.26677	0.132175	0.38517	9.82574	0.00172086	0.0158155	nicotinamide phosphoribosyltransferase [Source:MGI Symbol;Acc:MGI:1929865]	12	32819545	32853349	1	protein_coding	3	Nampt	1631	1950	1950	2702	0.603627	0.721688	0.721688	0.72	0.84	0.72	0.84	nicotinamide phosphoribosyltransferase	1.9e-03 ( 1.2e-04)	7.6e-01 (1.4e-01)	6.1e-01 (3.3e-01)	7.6e-01 (1.4e-01)
ENSMUSG00000023830	3.34283	0.0674983	0.618258	18.0514	0.000120278	0.00189746	6.85424	0.0324803	0.171444	12.1807	0.000482869	0.0112904	11.5086	0.000692763	0.0155159	14.8926	0.000113809	0.00202194	insulin-like growth factor 2 receptor [Source:MGI Symbol;Acc:MGI:96435]	17	12682406	12769664	-1	protein_coding	4	Igf2r	854	1079	854	776	1.10052	1.39046	1.10052	1.39	1	1.1	0.79	insulin-like growth factor 2 receptor	1.9e-03 ( 1.2e-04)	6.2e-01 (6.7e-02)	1.7e-01 (3.2e-02)	6.2e-01 (6.7e-02)
ENSMUSG00000024589	0.00659946	0.935253	0.992844	18.0394	0.000121002	0.00190459	6.64336	0.0360922	0.182877	11.0084	0.000906984	0.017085	11.1472	0.000841579	0.0175069	19.546	9.82054e-06	0.000289119	neural precursor cell expressed, developmentally down-regulated gene 4-like [Source:MGI Symbol;Acc:MGI:1933754]	18	64887705	65217831	1	protein_coding	11	Nedd4l	1111	1528	985	801	1.38702	1.90762	1.22971	1.91	1.13	1.23	0.73	neural precursor cell expressed, developmentally down-regulated gene 4-like	1.9e-03 ( 1.2e-04)	9.9e-01 (9.4e-01)	1.8e-01 (3.6e-02)	9.9e-01 (9.4e-01)
ENSMUSG00000025479	0.259391	0.610539	0.945252	18.0289	0.00012164	0.00191248	0.287724	0.866007	0.939842	5.45965	0.0194606	0.12299	5.24388	0.0220241	0.13795	21.7821	3.05435e-06	0.000111408	cytochrome P450, family 2, subfamily e, polypeptide 1 [Source:MGI Symbol;Acc:MGI:88607]	7	140763739	140774987	1	protein_coding	4	Cyp2e1	188046	180392	224138	295211	0.636988	0.611061	0.759247	0.61	0.84	0.76	1.04	cytochrome P450, family 2, subfamily e, polypeptide 1	1.9e-03 ( 1.2e-04)	9.5e-01 (6.1e-01)	9.4e-01 (8.7e-01)	9.5e-01 (6.1e-01)
ENSMUSG00000033174	7.21493	0.00722997	0.288951	18.019	0.000122245	0.00191984	7.4522	0.0240866	0.144716	11.517	0.000689638	0.0143767	8.42051	0.00371012	0.0456467	12.2891	0.00045561	0.00567713	monoglyceride lipase [Source:MGI Symbol;Acc:MGI:1346042]	6	88724412	88828360	1	protein_coding	10	Mgll	4959	3854	4959	6988	0.709645	0.551517	0.709645	0.55	1	0.71	1.29	monoglyceride lipase	1.9e-03 ( 1.2e-04)	2.9e-01 (7.2e-03)	1.4e-01 (2.4e-02)	2.9e-01 (7.2e-03)
ENSMUSG00000020038	2.94856	0.085954	0.656005	18.0134	0.000122584	0.00192301	4.04891	0.132065	0.377527	0.354244	0.551721	0.789679	0.315235	0.574486	0.80544	3.13896	0.0764426	0.231006	cryptochrome 1 (photolyase-like) [Source:MGI Symbol;Acc:MGI:1270841]	10	85131700	85185064	-1	protein_coding	4	Cry1	134	166	183	229	0.585153	0.724891	0.799127	0.72	0.73	0.8	0.81	cryptochrome 1 (photolyase-like)	1.9e-03 ( 1.2e-04)	6.6e-01 (8.6e-02)	3.8e-01 (1.3e-01)	6.6e-01 (8.6e-02)
ENSMUSG00000109336	0.226546	0.634097	0.947721	18.0078	0.000122927	0.00192622	17.809	0.000135779	0.00478577	15.5166	8.17822e-05	0.00328321	14.6391	0.000130182	0.0049678	17.7095	2.57344e-05	0.000626323	sterile alpha motif domain containing 4B [Source:MGI Symbol;Acc:MGI:2448542]	7	28399522	28598144	-1	protein_coding	5	Samd4b	427	693	408	464	0.920259	1.49353	0.87931	1.49	1.05	0.88	0.62	sterile alpha motif domain containing 4B	1.9e-03 ( 1.2e-04)	9.5e-01 (6.3e-01)	4.8e-03 (1.4e-04)	9.5e-01 (6.3e-01)
ENSMUSG00000038975	4.39579	0.0360278	0.521286	17.9966	0.000123618	0.00193489	4.40359	0.110604	0.344773	0.769498	0.380372	0.665277	0.819821	0.365233	0.657701	5.47638	0.0192751	0.0901667	Rab geranylgeranyl transferase, b subunit [Source:MGI Symbol;Acc:MGI:99537]	3	153907287	153913009	-1	protein_coding	12	Rabggtb	849	920	1055	1023	0.829912	0.899316	1.03128	0.9	0.8	1.03	0.92	Rab geranylgeranyl transferase, b subunit	1.9e-03 ( 1.2e-04)	5.2e-01 (3.6e-02)	3.4e-01 (1.1e-01)	5.2e-01 (3.6e-02)
ENSMUSG00000024576	0.00919265	0.923617	0.989928	17.9765	0.000124872	0.00195232	1.30124	0.521722	0.749163	3.52917	0.060298	0.23968	2.80572	0.0939285	0.321116	11.0292	0.000896867	0.00962897	casein kinase 1, alpha 1 [Source:MGI Symbol;Acc:MGI:1934950]	18	61555274	61590061	1	protein_coding	10	Csnk1a1	2030	1975	1687	1557	1.30379	1.26846	1.08349	1.27	1.2	1.08	1.03	casein kinase 1, alpha 1	2.0e-03 ( 1.2e-04)	9.9e-01 (9.2e-01)	7.5e-01 (5.2e-01)	9.9e-01 (9.2e-01)
ENSMUSG00000034424	0.694567	0.404615	0.898448	17.9686	0.00012536	0.00195777	19.6347	5.44965e-05	0.00252506	19.6314	9.3914e-06	0.000663177	21.302	3.92328e-06	0.000372261	23.3879	1.3241e-06	5.49441e-05	glycine cleavage system protein H (aminomethyl carrier) [Source:MGI Symbol;Acc:MGI:1915383]	8	116981810	116993537	-1	protein_coding	2	Gcsh	2997	1936	3231	2833	1.05789	0.683375	1.14049	0.68	0.93	1.14	1.55	glycine cleavage system protein H (aminomethyl carrier)	2.0e-03 ( 1.3e-04)	9.0e-01 (4.0e-01)	2.5e-03 (5.4e-05)	9.0e-01 (4.0e-01)
ENSMUSG00000040481	0.0650374	0.798704	0.97747	17.956	0.000126153	0.00196796	3.39321	0.183305	0.448817	12.5667	0.00039268	0.00984918	11.2163	0.00081084	0.0171447	27.4124	1.6437e-07	9.53824e-06	bromodomain PHD finger transcription factor [Source:MGI Symbol;Acc:MGI:2444008]	11	107033081	107132127	-1	protein_coding	8	Bptf	466	547	375	395	1.17975	1.38481	0.949367	1.38	1.24	0.95	0.85	bromodomain PHD finger transcription factor	2.0e-03 ( 1.3e-04)	9.8e-01 (8.0e-01)	4.5e-01 (1.8e-01)	9.8e-01 (8.0e-01)
ENSMUSG00000027782	1.15345	0.282828	0.850814	17.9228	0.000128268	0.00199872	8.5712	0.0137654	0.104401	2.67145	0.102163	0.328381	2.13054	0.14439	0.405533	5.75577	0.0164346	0.0810646	karyopherin (importin) alpha 4 [Source:MGI Symbol;Acc:MGI:1100848]	3	69067149	69127113	-1	protein_coding	3	Kpna4	1067	868	868	599	1.7813	1.44908	1.44908	1.45	1.23	1.45	1.23	karyopherin (importin) alpha 4	2.0e-03 ( 1.3e-04)	8.5e-01 (2.8e-01)	1.0e-01 (1.4e-02)	8.5e-01 (2.8e-01)
ENSMUSG00000031584	1.03136	0.30984	0.861937	17.9185	0.00012854	0.00200074	2.6567	0.264915	0.541398	1.02364	0.311658	0.600778	0.604217	0.436974	0.713951	6.87541	0.00873895	0.052133	glutathione reductase [Source:MGI Symbol;Acc:MGI:95804]	8	33652523	33698163	1	protein_coding	3	Gsr	1871	2117	1552	1259	1.4861	1.68149	1.23272	1.68	1.21	1.23	0.88	glutathione reductase	2.0e-03 ( 1.3e-04)	8.6e-01 (3.1e-01)	5.4e-01 (2.6e-01)	8.6e-01 (3.1e-01)
ENSMUSG00000039307	1.92389	0.165429	0.771926	17.9128	0.000128912	0.0020043	2.61853	0.270019	0.546672	6.13415	0.0132596	0.0977954	4.51902	0.03352	0.175577	10.2758	0.00134787	0.0131406	hexosaminidase (glycosyl hydrolase family 20, catalytic domain) containing [Source:MGI Symbol;Acc:MGI:3605542]	11	121204433	121222655	1	protein_coding	8	Hexdc	183	167	210	258	0.709302	0.647287	0.813953	0.65	0.87	0.81	1.1	hexosaminidase (glycosyl hydrolase family 20, catalytic domain) containing	2.0e-03 ( 1.3e-04)	7.7e-01 (1.7e-01)	5.5e-01 (2.7e-01)	7.7e-01 (1.7e-01)
ENSMUSG00000040505	1.05457	0.304456	0.861227	17.9078	0.000129234	0.00200708	2.6824	0.261531	0.537466	18.5085	1.69146e-05	0.00108838	18.711	1.52101e-05	0.0010269	14.7964	0.000119761	0.00209702	ATP binding cassette subfamily G member 5 [Source:MGI Symbol;Acc:MGI:1351659]	17	84658234	84683011	-1	protein_coding	4	Abcg5	1717	1532	1819	2139	0.802712	0.716223	0.850397	0.72	0.94	0.85	1.12	ATP binding cassette subfamily G member 5	2.0e-03 ( 1.3e-04)	8.6e-01 (3.0e-01)	5.4e-01 (2.6e-01)	8.6e-01 (3.0e-01)
ENSMUSG00000013846	1.85014	0.173767	0.776692	17.8888	0.000130468	0.00202174	10.2573	0.00592459	0.0607751	3.33839	0.0676808	0.256034	3.20722	0.073314	0.278256	9.01092	0.00268371	0.0220652	ST3 beta-galactoside alpha-2,3-sialyltransferase 1 [Source:MGI Symbol;Acc:MGI:98304]	15	67102875	67176830	-1	protein_coding	5	St3gal1	1757	2151	1316	1557	1.12845	1.3815	0.845215	1.38	1.34	0.85	0.82	ST3 beta-galactoside alpha-2,3-sialyltransferase 1	2.0e-03 ( 1.3e-04)	7.8e-01 (1.7e-01)	6.1e-02 (5.9e-03)	7.8e-01 (1.7e-01)
ENSMUSG00000047492	0.638845	0.424129	0.905798	17.8652	0.000132015	0.00204346	1.03991	0.594548	0.794579	5.4595	0.0194622	0.12299	4.93069	0.0263837	0.153419	8.92436	0.00281392	0.0229477	inhibin beta-E [Source:MGI Symbol;Acc:MGI:109269]	10	127348857	127354411	-1	protein_coding	1	Inhbe	3063	2850	1421	1612	1.90012	1.76799	0.881514	1.77	2.16	0.88	1.07	inhibin beta-E	2.0e-03 ( 1.3e-04)	9.1e-01 (4.2e-01)	7.9e-01 (5.9e-01)	9.1e-01 (4.2e-01)
ENSMUSG00000020689	0.765417	0.381639	0.889278	17.8314	0.000134262	0.00207594	8.56882	0.0137818	0.104468	15.459	8.43152e-05	0.00330775	14.9828	0.000108498	0.00449449	23.6083	1.18074e-06	5.06563e-05	integrin beta 3 [Source:MGI Symbol;Acc:MGI:96612]	11	104608000	104670476	1	protein_coding	2	Itgb3	241	335	213	205	1.17561	1.63415	1.03902	1.63	1.13	1.04	0.72	integrin beta 3	2.1e-03 ( 1.3e-04)	8.9e-01 (3.8e-01)	1.0e-01 (1.4e-02)	8.9e-01 (3.8e-01)
ENSMUSG00000024772	0.413181	0.520359	0.9286	17.8103	0.000135688	0.00209567	0.427616	0.807503	0.911403	4.18553	0.0407704	0.1917	4.11549	0.0424923	0.202013	9.0605	0.0026119	0.0216013	EH-domain containing 1 [Source:MGI Symbol;Acc:MGI:1341878]	19	6276725	6300096	1	protein_coding	4	Ehd1	1127	1116	995	907	1.24256	1.23043	1.09702	1.23	1.13	1.1	1.01	EH-domain containing 1	2.1e-03 ( 1.4e-04)	9.3e-01 (5.2e-01)	9.1e-01 (8.1e-01)	9.3e-01 (5.2e-01)
ENSMUSG00000000001	0.41891	0.517481	0.92831	17.7818	0.000137636	0.00212342	0.612069	0.736361	0.875964	7.69534	0.00553636	0.0563109	6.45036	0.011093	0.0921226	12.6775	0.000370073	0.00486149	guanine nucleotide binding protein (G protein), alpha inhibiting 3 [Source:MGI Symbol;Acc:MGI:95773]	3	108107280	108146146	-1	protein_coding	1	Gnai3	1942	1808	1579	1459	1.33105	1.2392	1.08225	1.24	1.23	1.08	1.07	guanine nucleotide binding protein (G protein), alpha inhibiting 3	2.1e-03 ( 1.4e-04)	9.3e-01 (5.2e-01)	8.8e-01 (7.4e-01)	9.3e-01 (5.2e-01)
ENSMUSG00000028479	4.7135	0.0299267	0.491164	17.7624	0.000138974	0.0021417	11.7352	0.00282959	0.0375739	0.0294083	0.86384	0.948646	0.0321084	0.85779	0.944577	1.23593	0.266257	0.501707	glucosamine (UDP-N-acetyl)-2-epimerase/N-acetylmannosamine kinase [Source:MGI Symbol;Acc:MGI:1354951]	4	44034075	44084177	-1	protein_coding	14	Gne	3432	5161	5161	5657	0.606682	0.912321	0.912321	0.91	0.66	0.91	0.66	glucosamine (UDP-N-acetyl)-2-epimerase/N-acetylmannosamine kinase	2.1e-03 ( 1.4e-04)	4.9e-01 (3.0e-02)	3.8e-02 (2.8e-03)	4.9e-01 (3.0e-02)
ENSMUSG00000074240	5.73478	0.0166322	0.398117	17.7459	0.000140132	0.00215717	5.891	0.0525758	0.227276	5.25573	0.0218746	0.132014	4.84593	0.0277115	0.157529	6.39968	0.0114141	0.0632208	calcium and integrin binding family member 3 [Source:MGI Symbol;Acc:MGI:2685953]	8	72204335	72212837	-1	protein_coding	2	Cib3	95	36	139	218	0.43578	0.165138	0.637615	0.17	0.68	0.64	2.64	calcium and integrin binding family member 3	2.2e-03 ( 1.4e-04)	4.0e-01 (1.7e-02)	2.3e-01 (5.3e-02)	4.0e-01 (1.7e-02)
ENSMUSG00000025486	0.826376	0.363323	0.885969	17.7311	0.00014117	0.00217076	4.85651	0.0881907	0.305006	4.28801	0.0383821	0.185772	3.9835	0.0459481	0.212044	16.1634	5.81061e-05	0.00120096	sirtuin 3 [Source:MGI Symbol;Acc:MGI:1927665]	7	140863666	140882309	-1	protein_coding	10	Sirt3	2323	1860	3155	2719	0.854358	0.684075	1.16035	0.68	0.74	1.16	1.25	sirtuin 3	2.2e-03 ( 1.4e-04)	8.9e-01 (3.6e-01)	3.1e-01 (8.8e-02)	8.9e-01 (3.6e-01)
ENSMUSG00000033943	2.08269	0.148977	0.766805	17.6869	0.000144326	0.00221685	18.6612	8.86676e-05	0.00348518	39.7352	2.90841e-10	1.25153e-07	43.845	3.55435e-11	2.62704e-08	26.845	2.20439e-07	1.22842e-05	MAX gene associated [Source:MGI Symbol;Acc:MGI:1352483]	2	119897228	119969581	1	protein_coding	15	Mga	443	682	443	487	0.909651	1.40041	0.909651	1.4	1	0.91	0.65	MAX gene associated	2.2e-03 ( 1.4e-04)	7.7e-01 (1.5e-01)	3.5e-03 (8.9e-05)	7.7e-01 (1.5e-01)
ENSMUSG00000044548	13.3658	0.000256255	0.0544417	17.6481	0.000147154	0.00225781	21.8186	1.82872e-05	0.00110299	1.88402	0.169878	0.435526	2.19431	0.138521	0.396182	0.0609544	0.804994	0.90834	dishevelled-binding antagonist of beta-catenin 1 [Source:MGI Symbol;Acc:MGI:1891740]	12	71309884	71320107	1	protein_coding	2	Dact1	64	173	144	143	0.447552	1.20979	1.00699	1.21	0.44	1.01	0.37	dishevelled-binding antagonist of beta-catenin 1	2.3e-03 ( 1.5e-04)	5.4e-02 (2.6e-04)	1.1e-03 (1.8e-05)	5.4e-02 (2.6e-04)
ENSMUSG00000052632	0.994631	0.318613	0.864895	17.6399	0.000147753	0.00226452	1.90471	0.385831	0.653544	2.02132	0.155105	0.415685	1.69166	0.193382	0.473439	10.6869	0.00107896	0.011084	ArfGAP with SH3 domain, ankyrin repeat and PH domain 2 [Source:MGI Symbol;Acc:MGI:2685438]	12	20990459	21270171	1	protein_coding	5	Asap2	115	92	67	59	1.94915	1.55932	1.13559	1.56	1.72	1.14	1.25	ArfGAP with SH3 domain, ankyrin repeat and PH domain 2	2.3e-03 ( 1.5e-04)	8.6e-01 (3.2e-01)	6.5e-01 (3.9e-01)	8.6e-01 (3.2e-01)
ENSMUSG00000022261	1.07121	0.300672	0.860128	17.6315	0.000148377	0.0022716	1.1895	0.551701	0.769005	5.99325	0.0143607	0.102354	4.88534	0.0270857	0.155535	10.6484	0.00110165	0.0112595	syndecan 2 [Source:MGI Symbol;Acc:MGI:1349165]	15	32920723	33034935	1	protein_coding	1	Sdc2	4907	5131	4498	4168	1.1773	1.23105	1.07917	1.23	1.09	1.08	0.96	syndecan 2	2.3e-03 ( 1.5e-04)	8.6e-01 (3.0e-01)	7.7e-01 (5.5e-01)	8.6e-01 (3.0e-01)
ENSMUSG00000027510	15.6463	7.63609e-05	0.0249867	17.6141	0.000149671	0.00228202	20.9925	2.76403e-05	0.00151082	1.06769	0.301468	0.592268	0.70825	0.400025	0.686072	0.791245	0.373724	0.612607	RNA binding motif protein 38 [Source:MGI Symbol;Acc:MGI:1889294]	2	173020498	173034734	1	protein_coding	8	Rbm38	153	182	166	80	1.9125	2.275	2.075	2.28	0.92	2.08	0.84	RNA binding motif protein 38	2.3e-03 ( 1.5e-04)	2.5e-02 (7.6e-05)	1.5e-03 (2.8e-05)	2.5e-02 (7.6e-05)
ENSMUSG00000031803	0.0607324	0.805342	0.979456	17.6136	0.00014971	0.00228202	1.31184	0.518964	0.747566	2.79253	0.0947044	0.314132	2.18809	0.139082	0.396896	24.2761	8.34674e-07	3.86842e-05	UDP-GlcNAc:betaGal beta-1,3-N-acetylglucosaminyltransferase 3 [Source:MGI Symbol;Acc:MGI:2152535]	8	71690756	71701789	-1	protein_coding	1	B3gnt3	72	133	72	45	1.6	2.95556	1.6	2.96	1	1.6	0.54	UDP-GlcNAc:betaGal beta-1,3-N-acetylglucosaminyltransferase 3	2.3e-03 ( 1.5e-04)	9.8e-01 (8.1e-01)	7.5e-01 (5.2e-01)	9.8e-01 (8.1e-01)
ENSMUSG00000021418	0.112737	0.73705	0.965182	17.6153	0.000149582	0.00228202	1.0705	0.585523	0.78872	5.26779	0.0217236	0.131487	5.32322	0.0210431	0.134103	13.4847	0.000240511	0.00351822	ribonuclease P 40 subunit [Source:MGI Symbol;Acc:MGI:1346084]	13	35893472	35906359	-1	protein_coding	4	Rpp40	141	119	219	231	0.61039	0.515152	0.948052	0.52	0.64	0.95	1.18	ribonuclease P 40 subunit	2.3e-03 ( 1.5e-04)	9.7e-01 (7.4e-01)	7.9e-01 (5.9e-01)	9.7e-01 (7.4e-01)
ENSMUSG00000056749	8.94327	0.00278494	0.192372	17.6108	0.000149923	0.00228278	10.8246	0.00446134	0.0508782	17.1821	3.39626e-05	0.0017654	12.6706	0.00037146	0.0101093	9.75544	0.00178793	0.0162195	nuclear factor, interleukin 3, regulated [Source:MGI Symbol;Acc:MGI:109495]	13	52967209	52981073	-1	protein_coding	1	Nfil3	799	1509	799	584	1.36815	2.5839	1.36815	2.58	1	1.37	0.53	nuclear factor, interleukin 3, regulated	2.3e-03 ( 1.5e-04)	1.9e-01 (2.8e-03)	5.1e-02 (4.5e-03)	1.9e-01 (2.8e-03)
ENSMUSG00000026456	12.8796	0.000332191	0.0610241	17.5233	0.000156629	0.0023797	14.6785	0.000649535	0.0139615	27.3388	1.70754e-07	2.85789e-05	24.4255	7.7238e-07	0.000119193	12.6834	0.000368917	0.00485084	cytochrome b5 reductase 1 [Source:MGI Symbol;Acc:MGI:1919267]	1	134405559	134411740	1	protein_coding	10	Cyb5r1	227	465	351	241	0.941909	1.92946	1.45643	1.93	0.65	1.46	0.49	cytochrome b5 reductase 1	2.4e-03 ( 1.6e-04)	6.1e-02 (3.3e-04)	1.4e-02 (6.5e-04)	6.1e-02 (3.3e-04)
ENSMUSG00000074277	10.6916	0.00107623	0.116786	17.4979	0.000158629	0.00240487	10.7735	0.00457678	0.0517892	3.36244	0.0666991	0.254346	2.25087	0.133539	0.387537	3.1922	0.0739905	0.225733	pleckstrin homology like domain, family B, member 3 [Source:MGI Symbol;Acc:MGI:3642959]	7	24610763	24629297	1	protein_coding	4	Phldb3	134	88	134	201	0.666667	0.437811	0.666667	0.44	1	0.67	1.52	pleckstrin homology like domain, family B, member 3	2.4e-03 ( 1.6e-04)	1.2e-01 (1.1e-03)	5.2e-02 (4.6e-03)	1.2e-01 (1.1e-03)
ENSMUSG00000054226	0.0221008	0.881819	0.984985	17.4508	0.000162405	0.0024568	4.28352	0.117448	0.355388	8.14276	0.00432335	0.0482827	8.50816	0.00353557	0.0444494	23.4313	1.29454e-06	5.42665e-05	Tp53rk binding protein [Source:MGI Symbol;Acc:MGI:1917036]	6	85911865	85930284	1	protein_coding	14	Tprkb	2730	2182	2986	2976	0.917339	0.733199	1.00336	0.73	0.91	1	1.25	Tp53rk binding protein	2.5e-03 ( 1.6e-04)	9.8e-01 (8.8e-01)	3.6e-01 (1.2e-01)	9.8e-01 (8.8e-01)
ENSMUSG00000024535	2.41425	0.120236	0.727217	17.4456	0.000162831	0.00246057	3.60216	0.16512	0.424262	3.34245	0.0675138	0.255613	2.51366	0.112864	0.354892	7.88754	0.00497764	0.0348982	sorting nexing 24 [Source:MGI Symbol;Acc:MGI:1916476]	18	53245662	53390823	1	protein_coding	2	Snx24	223	218	213	139	1.60432	1.56835	1.53237	1.57	1.05	1.53	1.02	sorting nexing 24	2.5e-03 ( 1.6e-04)	7.3e-01 (1.2e-01)	4.2e-01 (1.7e-01)	7.3e-01 (1.2e-01)
ENSMUSG00000032548	0.0507595	0.821747	0.979456	17.4347	0.000163718	0.00247131	5.59202	0.0610532	0.24703	7.04407	0.00795282	0.0716093	7.08422	0.00777655	0.0739879	15.8553	6.8375e-05	0.00135238	solute carrier organic anion transporter family, member 2a1 [Source:MGI Symbol;Acc:MGI:1346021]	9	102988712	103096002	1	protein_coding	4	Slco2a1	1361	1718	936	1096	1.24179	1.56752	0.854015	1.57	1.45	0.85	0.79	solute carrier organic anion transporter family, member 2a1	2.5e-03 ( 1.6e-04)	9.8e-01 (8.2e-01)	2.5e-01 (6.1e-02)	9.8e-01 (8.2e-01)
ENSMUSG00000045435	0.333207	0.563776	0.936478	17.4169	0.000165181	0.00249071	0.526864	0.76841	0.892312	7.06949	0.00784077	0.0711014	6.66058	0.0098569	0.0860824	24.8657	6.14672e-07	2.9868e-05	transmembrane protein 60 [Source:MGI Symbol;Acc:MGI:2673965]	5	20882191	20886870	1	protein_coding	2	Tmem60	162	143	217	238	0.680672	0.60084	0.911765	0.6	0.75	0.91	1.13	transmembrane protein 60	2.5e-03 ( 1.7e-04)	9.4e-01 (5.6e-01)	8.9e-01 (7.7e-01)	9.4e-01 (5.6e-01)
ENSMUSG00000027359	0.859005	0.354017	0.882686	17.389	0.000167501	0.00252298	0.915081	0.632838	0.818939	5.1215	0.0236312	0.138487	5.20644	0.0225033	0.139799	19.4734	1.02008e-05	0.000298437	solute carrier family 27 (fatty acid transporter), member 2 [Source:MGI Symbol;Acc:MGI:1347099]	2	126552407	126588243	1	protein_coding	4	Slc27a2	33196	34321	44859	41472	0.800444	0.82757	1.08167	0.83	0.74	1.08	0.97	solute carrier family 27 (fatty acid transporter), member 2	2.5e-03 ( 1.7e-04)	8.8e-01 (3.5e-01)	8.2e-01 (6.3e-01)	8.8e-01 (3.5e-01)
ENSMUSG00000021607	1.4194	0.233503	0.823496	17.3813	0.000168149	0.00253001	2.58828	0.274133	0.551301	16.0396	6.20323e-05	0.00272033	13.3585	0.000257258	0.00806402	14.5161	0.000138968	0.0023288	mitochondrial ribosomal protein L36 [Source:MGI Symbol;Acc:MGI:2137228]	13	73328513	73332178	1	protein_coding	3	Mrpl36	542	481	695	718	0.754875	0.669916	0.967967	0.67	0.78	0.97	1.13	mitochondrial ribosomal protein L36	2.5e-03 ( 1.7e-04)	8.2e-01 (2.3e-01)	5.5e-01 (2.7e-01)	8.2e-01 (2.3e-01)
ENSMUSG00000048878	1.50306	0.220201	0.813851	17.365	0.000169526	0.00254713	13.4312	0.00121183	0.0213298	2.77266e-06	0.998671	0.999107	0.0270674	0.86932	0.949439	1.55877	0.211846	0.436743	hexamethylene bis-acetamide inducible 1 [Source:MGI Symbol;Acc:MGI:2385923]	11	103116231	103119725	1	protein_coding	1	Hexim1	1274	916	916	856	1.48832	1.07009	1.07009	1.07	1.39	1.07	1.39	hexamethylene bis-acetamide inducible 1	2.5e-03 ( 1.7e-04)	8.1e-01 (2.2e-01)	2.1e-02 (1.2e-03)	8.1e-01 (2.2e-01)
ENSMUSG00000053929	0.241689	0.622989	0.946136	17.3635	0.000169651	0.00254713	6.4738	0.0392854	0.191808	7.58557	0.00588374	0.0585422	7.41646	0.00646298	0.0658546	15.4464	8.48773e-05	0.00160477	cysteine and histidine rich 1 [Source:MGI Symbol;Acc:MGI:1859320]	15	76643395	76660117	-1	protein_coding	9	Cyhr1	1948	1673	2235	2244	0.868093	0.745544	0.995989	0.75	0.87	1	1.16	cysteine and histidine rich 1	2.5e-03 ( 1.7e-04)	9.5e-01 (6.2e-01)	1.9e-01 (3.9e-02)	9.5e-01 (6.2e-01)
ENSMUSG00000019889	0.187352	0.66513	0.950925	17.3494	0.000170857	0.00256249	0.187841	0.910355	0.959265	5.92812	0.0149012	0.105054	5.3009	0.0213144	0.135071	17.6026	2.72216e-05	0.000658202	protein tyrosine phosphatase, receptor type, K [Source:MGI Symbol;Acc:MGI:103310]	10	28074820	28597397	1	protein_coding	11	Ptprk	1563	1644	1469	1190	1.31345	1.38151	1.23445	1.38	1.06	1.23	0.95	protein tyrosine phosphatase, receptor type, K	2.6e-03 ( 1.7e-04)	9.5e-01 (6.7e-01)	9.6e-01 (9.1e-01)	9.5e-01 (6.7e-01)
ENSMUSG00000041712	3.10323	0.0781371	0.63744	17.3404	0.000171625	0.00257125	3.1109	0.211094	0.480177	2.02451	0.154779	0.415685	1.96785	0.160677	0.432654	7.47684	0.00624978	0.0409928	ubiquitin protein ligase E3 component n-recognin 7 (putative) [Source:MGI Symbol;Acc:MGI:1913872]	12	102757967	102777707	1	protein_coding	1	Ubr7	326	367	433	489	0.666667	0.750511	0.885481	0.75	0.75	0.89	0.89	ubiquitin protein ligase E3 component n-recognin 7 (putative)	2.6e-03 ( 1.7e-04)	6.4e-01 (7.8e-02)	4.8e-01 (2.1e-01)	6.4e-01 (7.8e-02)
ENSMUSG00000029822	1.40843	0.235317	0.824781	17.3038	0.000174791	0.00261588	4.15276	0.125384	0.36755	12.687	0.000368197	0.00938992	15.3854	8.76611e-05	0.00389565	20.3218	6.54501e-06	0.000211778	oxysterol binding protein-like 3 [Source:MGI Symbol;Acc:MGI:1918970]	6	50293330	50456201	-1	protein_coding	10	Osbpl3	79	41	79	122	0.647541	0.336066	0.647541	0.34	1	0.65	1.93	oxysterol binding protein-like 3	2.6e-03 ( 1.7e-04)	8.2e-01 (2.4e-01)	3.7e-01 (1.3e-01)	8.2e-01 (2.4e-01)
ENSMUSG00000027099	0.0903229	0.763767	0.970559	17.2891	0.000176085	0.00263244	6.21799	0.0446457	0.207001	18.9179	1.36464e-05	0.000907784	20.2928	6.64495e-06	0.000558773	25.2181	5.12004e-07	2.53172e-05	metaxin 2 [Source:MGI Symbol;Acc:MGI:1859652]	2	74825803	74878431	1	protein_coding	3	Mtx2	1007	802	1063	1148	0.877178	0.698606	0.925958	0.7	0.95	0.93	1.26	metaxin 2	2.6e-03 ( 1.8e-04)	9.7e-01 (7.6e-01)	2.1e-01 (4.5e-02)	9.7e-01 (7.6e-01)
ENSMUSG00000019838	12.2171	0.000473544	0.0799756	17.2731	0.000177495	0.00265068	15.7665	0.000377006	0.00953065	0.428504	0.512724	0.761741	0.551573	0.457676	0.729197	0.154329	0.694432	0.848288	solute carrier family 16 (monocarboxylic acid transporters), member 10 [Source:MGI Symbol;Acc:MGI:1919722]	10	40033532	40142258	-1	protein_coding	4	Slc16a10	2591	3726	3726	3456	0.749711	1.07812	1.07812	1.08	0.7	1.08	0.7	solute carrier family 16 (monocarboxylic acid transporters), member 10	2.7e-03 ( 1.8e-04)	8.0e-02 (4.7e-04)	9.5e-03 (3.8e-04)	8.0e-02 (4.7e-04)
ENSMUSG00000067148	0.0443247	0.833251	0.980326	17.2607	0.000178602	0.00266437	1.97417	0.372661	0.642752	9.34011	0.00224192	0.0312146	9.12863	0.0025164	0.0361756	19.2818	1.12779e-05	0.000322557	polymerase (RNA) I polypeptide C [Source:MGI Symbol;Acc:MGI:103288]	17	46243920	46248054	-1	protein_coding	8	Polr1c	491	450	588	581	0.845095	0.774527	1.01205	0.77	0.84	1.01	1.09	polymerase (RNA) I polypeptide C	2.7e-03 ( 1.8e-04)	9.8e-01 (8.3e-01)	6.4e-01 (3.7e-01)	9.8e-01 (8.3e-01)
ENSMUSG00000074211	0.889469	0.345621	0.877725	17.2513	0.000179441	0.00267403	1.7872	0.40918	0.672025	7.80348	0.00521456	0.054311	6.35551	0.0117017	0.0948223	13.2711	0.000269529	0.00384654	succinate dehydrogenase complex assembly factor 1 [Source:MGI Symbol;Acc:MGI:1915582]	7	30321406	30323895	-1	protein_coding	1	Sdhaf1	509	414	563	622	0.818328	0.665595	0.905145	0.67	0.9	0.91	1.23	succinate dehydrogenase complex assembly factor 1	2.7e-03 ( 1.8e-04)	8.8e-01 (3.5e-01)	6.7e-01 (4.1e-01)	8.8e-01 (3.5e-01)
ENSMUSG00000078687	1.83367	0.175695	0.776795	17.2421	0.000180273	0.00268357	6.85837	0.0324133	0.171284	14.789	0.000120236	0.00426714	13.4498	0.000245027	0.00780253	12.2961	0.0004539	0.00566552	major urinary protein 8 [Source:MGI Symbol;Acc:MGI:3709619]	4	60218621	60222599	-1	protein_coding	2	Mup8	240	65	335	270	0.888889	0.240741	1.24074	0.24	0.72	1.24	3.69	major urinary protein 8	2.7e-03 ( 1.8e-04)	7.8e-01 (1.8e-01)	1.7e-01 (3.2e-02)	7.8e-01 (1.8e-01)
ENSMUSG00000028932	0.719166	0.396417	0.896535	17.2348	0.000180932	0.00269052	3.06276	0.216237	0.48662	0.405992	0.524011	0.770235	0.377804	0.538781	0.78324	3.48257	0.0620184	0.201044	proteasome (prosome, macropain) 26S subunit, ATPase 2 [Source:MGI Symbol;Acc:MGI:109555]	5	21785283	21803787	1	protein_coding	2	Psmc2	2747	2330	2186	1953	1.40655	1.19304	1.1193	1.19	1.26	1.12	1.18	proteasome (prosome, macropain) 26S subunit, ATPase 2	2.7e-03 ( 1.8e-04)	9.0e-01 (4.0e-01)	4.9e-01 (2.2e-01)	9.0e-01 (4.0e-01)
ENSMUSG00000024999	8.68295	0.00321201	0.20511	17.2137	0.000182851	0.00271222	8.81711	0.0121727	0.0962333	10.9214	0.000950616	0.0176177	8.60974	0.0033437	0.042921	5.65226	0.0174329	0.0843883	NOC3 like DNA replication regulator [Source:MGI Symbol;Acc:MGI:1932610]	19	38788128	38819237	-1	protein_coding	1	Noc3l	150	194	150	98	1.53061	1.97959	1.53061	1.98	1	1.53	0.77	NOC3 like DNA replication regulator	2.7e-03 ( 1.8e-04)	2.1e-01 (3.2e-03)	9.6e-02 (1.2e-02)	2.1e-01 (3.2e-03)
ENSMUSG00000069835	0.747066	0.387407	0.891911	17.2123	0.000182973	0.00271222	8.0064	0.0182572	0.122646	5.60266	0.0179332	0.117535	6.83826	0.00892259	0.0812054	10.1368	0.00145341	0.0139414	spermidine/spermine N1-acetyl transferase 2 [Source:MGI Symbol;Acc:MGI:1916465]	11	69622024	69623870	1	protein_coding	3	Sat2	255	301	198	231	1.1039	1.30303	0.857143	1.3	1.29	0.86	0.85	spermidine/spermine N1-acetyl transferase 2	2.7e-03 ( 1.8e-04)	8.9e-01 (3.9e-01)	1.2e-01 (1.8e-02)	8.9e-01 (3.9e-01)
ENSMUSG00000052776	1.52895	0.216269	0.809741	17.2128	0.000182929	0.00271222	5.78397	0.0554659	0.23399	8.97186	0.00274169	0.0354822	8.4451	0.00366027	0.0453599	9.34936	0.00223064	0.0191589	2'-5' oligoadenylate synthetase 1A [Source:MGI Symbol;Acc:MGI:2180860]	5	120896256	120907521	-1	protein_coding	1	Oas1a	69	44	99	97	0.71134	0.453608	1.02062	0.45	0.7	1.02	1.57	2'-5' oligoadenylate synthetase 1A	2.7e-03 ( 1.8e-04)	8.1e-01 (2.2e-01)	2.3e-01 (5.5e-02)	8.1e-01 (2.2e-01)
ENSMUSG00000040549	0.0209756	0.884845	0.986625	17.2069	0.000183469	0.0027167	2.23595	0.326941	0.605545	16.2565	5.53194e-05	0.00248937	15.1907	9.71833e-05	0.00418633	19.2666	1.1368e-05	0.000323689	cytoskeleton associated protein 5 [Source:MGI Symbol;Acc:MGI:1923036]	2	91526762	91620664	1	protein_coding	9	Ckap5	215	245	161	170	1.26471	1.44118	0.947059	1.44	1.34	0.95	0.88	cytoskeleton associated protein 5	2.7e-03 ( 1.8e-04)	9.9e-01 (8.8e-01)	6.1e-01 (3.3e-01)	9.9e-01 (8.8e-01)
ENSMUSG00000026123	0.410396	0.521769	0.9286	17.2007	0.000184045	0.00272235	1.81304	0.403927	0.66748	0.987825	0.320275	0.608552	0.826501	0.363286	0.656242	10.5802	0.00114306	0.0116235	pleckstrin homology domain containing, family B (evectins) member 2 [Source:MGI Symbol;Acc:MGI:2385825]	1	34849976	34879580	1	protein_coding	4	Plekhb2	492	401	401	272	1.80882	1.47426	1.47426	1.47	1.23	1.47	1.23	pleckstrin homology domain containing, family B (evectins) member 2	2.7e-03 ( 1.8e-04)	9.3e-01 (5.2e-01)	6.7e-01 (4.0e-01)	9.3e-01 (5.2e-01)
ENSMUSG00000001175	2.10655	0.14667	0.765376	17.1908	0.000184952	0.00273288	11.6138	0.00300681	0.0392821	8.11461e-05	0.992813	0.997701	0.0122041	0.912035	0.967296	1.78843	0.181118	0.398194	calmodulin 1 [Source:MGI Symbol;Acc:MGI:88251]	12	100199435	100209814	1	protein_coding	4	Calm1	6291	4908	4908	4443	1.41594	1.10466	1.10466	1.1	1.28	1.1	1.28	calmodulin 1	2.7e-03 ( 1.8e-04)	7.7e-01 (1.5e-01)	3.9e-02 (3.0e-03)	7.7e-01 (1.5e-01)
ENSMUSG00000068011	0.159544	0.689576	0.95716	17.1604	0.000187789	0.00276895	0.362622	0.834176	0.924857	2.43128	0.118936	0.35782	1.85816	0.172837	0.449889	5.32745	0.0209921	0.0956494	makorin, ring finger protein 2, opposite strand [Source:MGI Symbol;Acc:MGI:1917541]	6	115583544	115592576	-1	protein_coding	2	Mkrn2os	578	559	455	372	1.55376	1.50269	1.22312	1.5	1.27	1.22	1.03	makorin, ring finger protein 2, opposite strand	2.8e-03 ( 1.9e-04)	9.6e-01 (6.9e-01)	9.2e-01 (8.3e-01)	9.6e-01 (6.9e-01)
ENSMUSG00000020847	0.198957	0.655564	0.948813	17.1363	0.000190065	0.00279955	0.683477	0.710534	0.862112	4.06356	0.0438181	0.199945	3.26039	0.0709723	0.272545	14.8077	0.00011905	0.0020924	rabphilin 3A-like (without C2 domains) [Source:MGI Symbol;Acc:MGI:1923492]	11	75830999	75938429	-1	protein_coding	5	Rph3al	93	105	65	62	1.5	1.69355	1.04839	1.69	1.43	1.05	0.89	rabphilin 3A-like (without C2 domains)	2.8e-03 ( 1.9e-04)	9.5e-01 (6.6e-01)	8.6e-01 (7.1e-01)	9.5e-01 (6.6e-01)
ENSMUSG00000022035	0.0581016	0.809522	0.979456	17.1247	0.000191173	0.00281292	10.0048	0.0067219	0.0655925	9.73404	0.00180886	0.0271952	9.47718	0.00208043	0.0316335	17.9556	2.26115e-05	0.000564003	coiled-coil domain containing 25 [Source:MGI Symbol;Acc:MGI:1914429]	14	65837302	65866607	1	protein_coding	3	Ccdc25	675	575	939	839	0.804529	0.68534	1.11919	0.69	0.72	1.12	1.17	coiled-coil domain containing 25	2.8e-03 ( 1.9e-04)	9.8e-01 (8.1e-01)	6.6e-02 (6.7e-03)	9.8e-01 (8.1e-01)
ENSMUSG00000073600	5.54638	0.0185189	0.408094	17.1003	0.00019352	0.00284147	11.14	0.00381055	0.0460655	0.00400892	0.949515	0.982626	0.0147235	0.903421	0.964116	1.65469	0.198321	0.419937	proline rich basic protein 1 [Source:MGI Symbol;Acc:MGI:2686460]	18	35650351	35655238	-1	protein_coding	3	Prob1	269	382	382	381	0.706037	1.00262	1.00262	1	0.7	1	0.7	proline rich basic protein 1	2.8e-03 ( 1.9e-04)	4.1e-01 (1.9e-02)	4.6e-02 (3.8e-03)	4.1e-01 (1.9e-02)
ENSMUSG00000016756	11.6653	0.000636774	0.0933258	17.0852	0.000194979	0.00285989	12.5889	0.00184651	0.0282694	7.1141	0.00764802	0.0703274	6.76226	0.0093106	0.0832794	6.90904	0.00857609	0.0514236	cytidine monophospho-N-acetylneuraminic acid hydroxylase [Source:MGI Symbol;Acc:MGI:103227]	13	24327404	24477377	1	protein_coding	10	Cmah	2607	1789	2108	2688	0.969866	0.665551	0.784226	0.67	1.24	0.78	1.46	cytidine monophospho-N-acetylneuraminic acid hydroxylase	2.9e-03 ( 1.9e-04)	9.3e-02 (6.4e-04)	2.8e-02 (1.8e-03)	9.3e-02 (6.4e-04)
ENSMUSG00000028426	0.286218	0.592655	0.943212	17.0787	0.000195615	0.00286623	4.8552	0.0882482	0.305023	1.30861	0.252646	0.536707	0.865212	0.352284	0.646939	5.10385	0.0238728	0.104973	RAD23 homolog B, nucleotide excision repair protein [Source:MGI Symbol;Acc:MGI:105128]	4	55350043	55392237	1	protein_coding	4	Rad23b	4308	3638	3167	2754	1.56427	1.32099	1.14996	1.32	1.36	1.15	1.18	RAD23 homolog B, nucleotide excision repair protein	2.9e-03 ( 2.0e-04)	9.4e-01 (5.9e-01)	3.1e-01 (8.8e-02)	9.4e-01 (5.9e-01)
ENSMUSG00000004317	7.83222	0.0051323	0.255025	17.0131	0.000202145	0.00295262	7.91321	0.019128	0.125436	9.8378	0.00170962	0.0261281	8.88933	0.00286841	0.0388065	11.2453	0.000798239	0.0087988	chloride channel, voltage-sensitive 5 [Source:MGI Symbol;Acc:MGI:99486]	X	7153810	7319358	-1	protein_coding	5	Clcn5	104	161	118	79	1.31646	2.03797	1.49367	2.04	0.88	1.49	0.65	chloride channel, voltage-sensitive 5	3.0e-03 ( 2.0e-04)	2.6e-01 (5.1e-03)	1.3e-01 (1.9e-02)	2.6e-01 (5.1e-03)
ENSMUSG00000024014	0.145615	0.702761	0.959548	16.9736	0.00020617	0.00300827	0.42525	0.808459	0.911953	7.67351	0.00560373	0.0568213	7.57448	0.00592004	0.0618105	14.9019	0.00011325	0.00201824	proviral integration site 1 [Source:MGI Symbol;Acc:MGI:97584]	17	29490812	29496111	1	protein_coding	1	Pim1	466	374	466	654	0.712538	0.571865	0.712538	0.57	1	0.71	1.25	proviral integration site 1	3.0e-03 ( 2.1e-04)	9.6e-01 (7.0e-01)	9.1e-01 (8.1e-01)	9.6e-01 (7.0e-01)
ENSMUSG00000039361	0.309508	0.577983	0.939129	16.9488	0.000208742	0.00304263	2.05893	0.357198	0.630618	11.6933	0.000627267	0.0135384	11.5206	0.000688283	0.0154402	17.451	2.94807e-05	0.000702881	phosphatidylinositol binding clathrin assembly protein [Source:MGI Symbol;Acc:MGI:2385902]	7	90130213	90213465	1	protein_coding	15	Picalm	2785	2971	2412	2408	1.15656	1.2338	1.00166	1.23	1.15	1	0.94	phosphatidylinositol binding clathrin assembly protein	3.0e-03 ( 2.1e-04)	9.4e-01 (5.8e-01)	6.3e-01 (3.6e-01)	9.4e-01 (5.8e-01)
ENSMUSG00000020661	7.7315	0.00542655	0.260832	16.94	0.000209663	0.00305157	20.7617	3.10211e-05	0.00161367	24.7934	6.38146e-07	8.78727e-05	27.5421	1.53708e-07	3.27033e-05	12.4385	0.000420568	0.00535452	DNA methyltransferase 3A [Source:MGI Symbol;Acc:MGI:1261827]	12	3806007	3914443	1	protein_coding	18	Dnmt3a	316	524	316	329	0.960486	1.59271	0.960486	1.59	1	0.96	0.6	DNA methyltransferase 3A	3.1e-03 ( 2.1e-04)	2.6e-01 (5.4e-03)	1.6e-03 (3.1e-05)	2.6e-01 (5.4e-03)
ENSMUSG00000023990	2.69707	0.100533	0.689731	16.9388	0.000209792	0.00305157	5.81195	0.0546954	0.232374	0.330186	0.56555	0.797812	0.264226	0.607231	0.824058	3.05593	0.0804427	0.238475	transcription factor EB [Source:MGI Symbol;Acc:MGI:103270]	17	47737030	47792419	1	protein_coding	15	Tfeb	207	294	285	369	0.560976	0.796748	0.772358	0.8	0.73	0.77	0.7	transcription factor EB	3.1e-03 ( 2.1e-04)	6.9e-01 (1.0e-01)	2.3e-01 (5.5e-02)	6.9e-01 (1.0e-01)
ENSMUSG00000036504	2.02391	0.15484	0.769444	16.9313	0.000210581	0.00305987	3.86712	0.144633	0.397019	11.0517	0.000886062	0.0168794	9.61842	0.00192635	0.0300242	15.013	0.000106776	0.00193478	phosphohistidine phosphatase 1 [Source:MGI Symbol;Acc:MGI:1922704]	2	25573430	25575224	-1	protein_coding	2	Phpt1	522	418	548	666	0.783784	0.627628	0.822823	0.63	0.95	0.82	1.25	phosphohistidine phosphatase 1	3.1e-03 ( 2.1e-04)	7.7e-01 (1.5e-01)	4.0e-01 (1.4e-01)	7.7e-01 (1.5e-01)
ENSMUSG00000020198	0.412487	0.52071	0.9286	16.9161	0.00021218	0.00307991	17.6967	0.000143617	0.00494982	7.62088	0.00576962	0.0579984	7.95608	0.00479261	0.0533724	10.0472	0.00152583	0.0144877	adaptor-related protein complex 3, delta 1 subunit [Source:MGI Symbol;Acc:MGI:107734]	10	80706956	80742264	-1	protein_coding	7	Ap3d1	1240	1498	1043	1251	0.991207	1.19744	0.833733	1.2	1.19	0.83	0.83	adaptor-related protein complex 3, delta 1 subunit	3.1e-03 ( 2.1e-04)	9.3e-01 (5.2e-01)	4.9e-03 (1.4e-04)	9.3e-01 (5.2e-01)
ENSMUSG00000035900	1.10348	0.293505	0.854293	16.9114	0.000212689	0.0030841	1.83633	0.399252	0.664158	4.43607	0.0351872	0.176367	4.83906	0.0278221	0.15767	16.4783	4.92095e-05	0.00105798	GRAM domain containing 4 [Source:MGI Symbol;Acc:MGI:2676308]	15	86057695	86137634	1	protein_coding	5	Gramd4	120	137	79	96	1.25	1.42708	0.822917	1.43	1.52	0.82	0.88	GRAM domain containing 4	3.1e-03 ( 2.1e-04)	8.5e-01 (2.9e-01)	6.6e-01 (4.0e-01)	8.5e-01 (2.9e-01)
ENSMUSG00000042198	1.91933	0.16593	0.773008	16.8915	0.000214816	0.00311172	2.50032	0.286459	0.564964	6.41586	0.0113106	0.0887652	5.04852	0.024647	0.147284	10.2751	0.0013484	0.0131406	coiled-coil-helix-coiled-coil-helix domain containing 7 [Source:MGI Symbol;Acc:MGI:1913683]	4	3938888	3951046	1	protein_coding	15	Chchd7	420	391	465	762	0.551181	0.513123	0.610236	0.51	0.9	0.61	1.07	coiled-coil-helix-coiled-coil-helix domain containing 7	3.1e-03 ( 2.1e-04)	7.7e-01 (1.7e-01)	5.6e-01 (2.9e-01)	7.7e-01 (1.7e-01)
ENSMUSG00000021286	1.95918	0.161602	0.769852	16.8646	0.000217716	0.00314721	2.86652	0.23853	0.512161	8.61572	0.00333274	0.0403267	7.58074	0.00589952	0.0616569	19.3444	1.09137e-05	0.000314705	zinc finger, FYVE domain containing 21 [Source:MGI Symbol;Acc:MGI:1915770]	12	111814170	111832192	1	protein_coding	7	Zfyve21	943	695	943	1222	0.771686	0.56874	0.771686	0.57	1	0.77	1.36	zinc finger, FYVE domain containing 21	3.1e-03 ( 2.2e-04)	7.7e-01 (1.6e-01)	5.1e-01 (2.4e-01)	7.7e-01 (1.6e-01)
ENSMUSG00000022130	0.0539915	0.816258	0.979456	16.8604	0.000218174	0.00315057	0.385541	0.824671	0.920078	4.51819	0.0335362	0.171926	4.34299	0.0371617	0.187285	11.7932	0.00059449	0.00703914	TDP-glucose 4,6-dehydratase [Source:MGI Symbol;Acc:MGI:1923605]	14	118111911	118132755	-1	protein_coding	4	Tgds	635	643	830	817	0.777234	0.787026	1.01591	0.79	0.77	1.02	0.99	TDP-glucose 4,6-dehydratase	3.2e-03 ( 2.2e-04)	9.8e-01 (8.2e-01)	9.2e-01 (8.2e-01)	9.8e-01 (8.2e-01)
ENSMUSG00000040841	5.73704	0.0166107	0.398117	16.8423	0.000220157	0.00317466	6.07091	0.0480529	0.216196	0.652501	0.41922	0.693017	0.958325	0.327609	0.624066	7.22825	0.00717653	0.0453337	sine oculis-related homeobox 5 [Source:MGI Symbol;Acc:MGI:106220]	7	19094594	19098549	1	protein_coding	1	Six5	141	111	86	116	1.21552	0.956897	0.741379	0.96	1.64	0.74	1.27	sine oculis-related homeobox 5	3.2e-03 ( 2.2e-04)	4.0e-01 (1.7e-02)	2.2e-01 (4.8e-02)	4.0e-01 (1.7e-02)
[truncated: 9,220 more rows]

## Sheet: ethanol changed genes
ensembl_gene	diffGavageEffect.stat	diffGavageEffect.pvalue	diffGavageEffect.padj	gavageEffect.stat	gavageEffect.pvalue	gavageEffect.padj	nmnEffect.stat	nmnEffect.pvalue	nmnEffect.padj	altEffect.stat	altEffect.pvalue	altEffect.padj	astEffect.stat	astEffect.pvalue	astEffect.padj	pEtOHEffect.stat	pEtOHEffect.pvalue	pEtOHEffect.padj	Gene.description	Chromosome	Gene.start..bp.	Gene.end..bp.	Strand	Gene.type	Transcript.count	Gene.name	EtOH_NMN_median	EtOH_Saline_median	Ctrl_NMN_median	Ctrl_Saline_median	EtOH_NMN_pctTC	EtOH_Saline_pctTC	Ctrl_NMN_pctTC	gavageEffect_Saline	gavageEffect_NMN	nmnEffect_Ctrl	nmnEffect_EtOH	description	EtOH_effect	diffEtOH_effect	NMN_effect	diffNMN_effect
[truncated: 1,778 more rows]

[truncated: 4 more sheets: nmn-dependent ethanol effect, nmn-independent ethanol effect, nmn-dependent KEGG pathways, nmn-independent KEGG pathways]
